# Supplementary material for: Enantioselective acyl transfer catalysis by a combination of common catalytic motifs and electrostatic interactions
Source: PubMed Central journal article supplement (PMC4835565; doi:10.1038/ncomms11297), 2016-04-15
Supplement: ncomms11297-s1.pdf [file ncomms11297-s1.pdf]

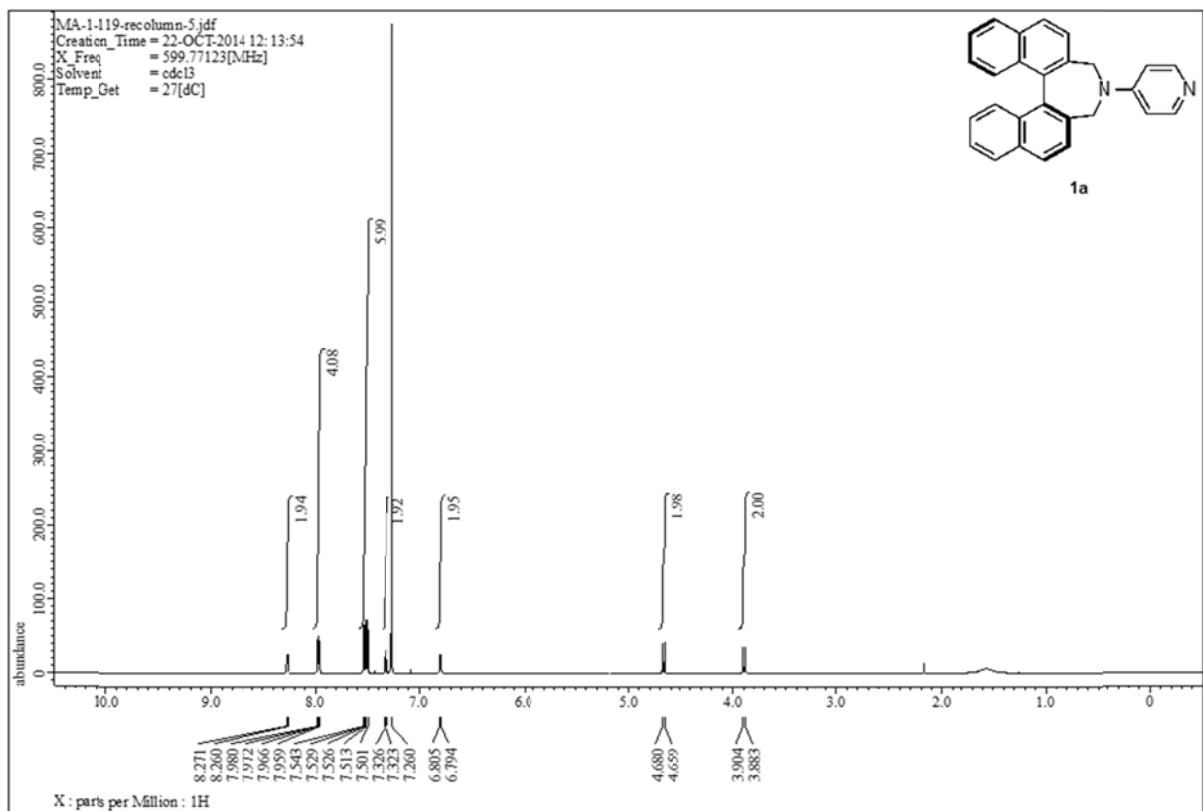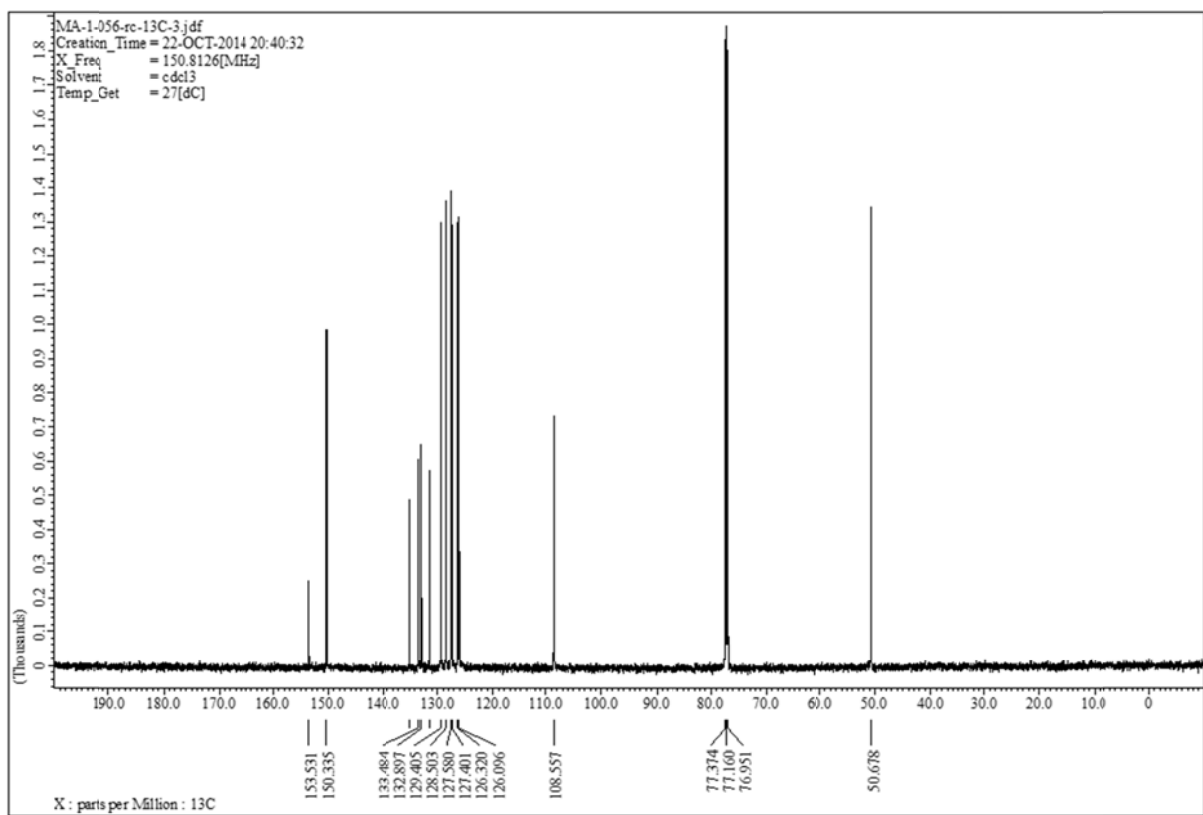

Supplementary Figure 1.  $^1\text{H}$  and  $^{13}\text{C}$ -NMR spectra for catalyst **1a**

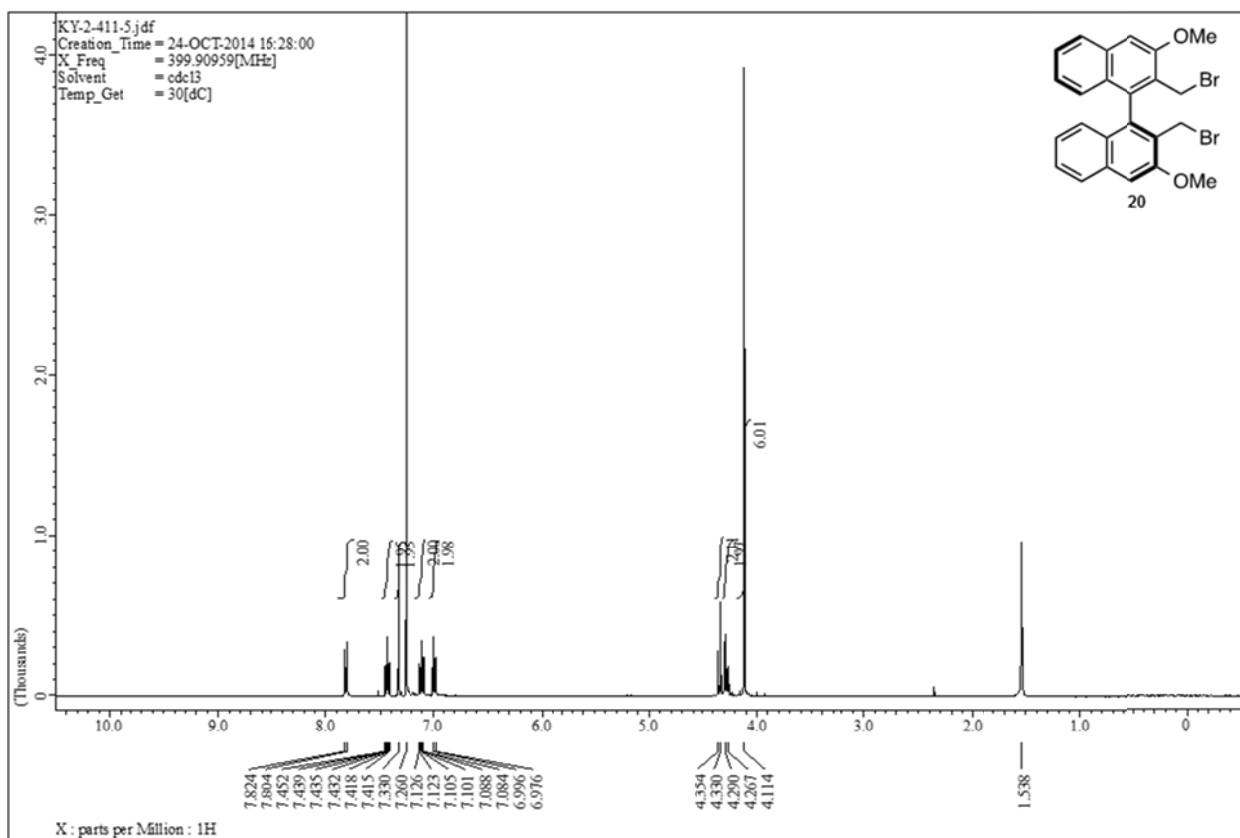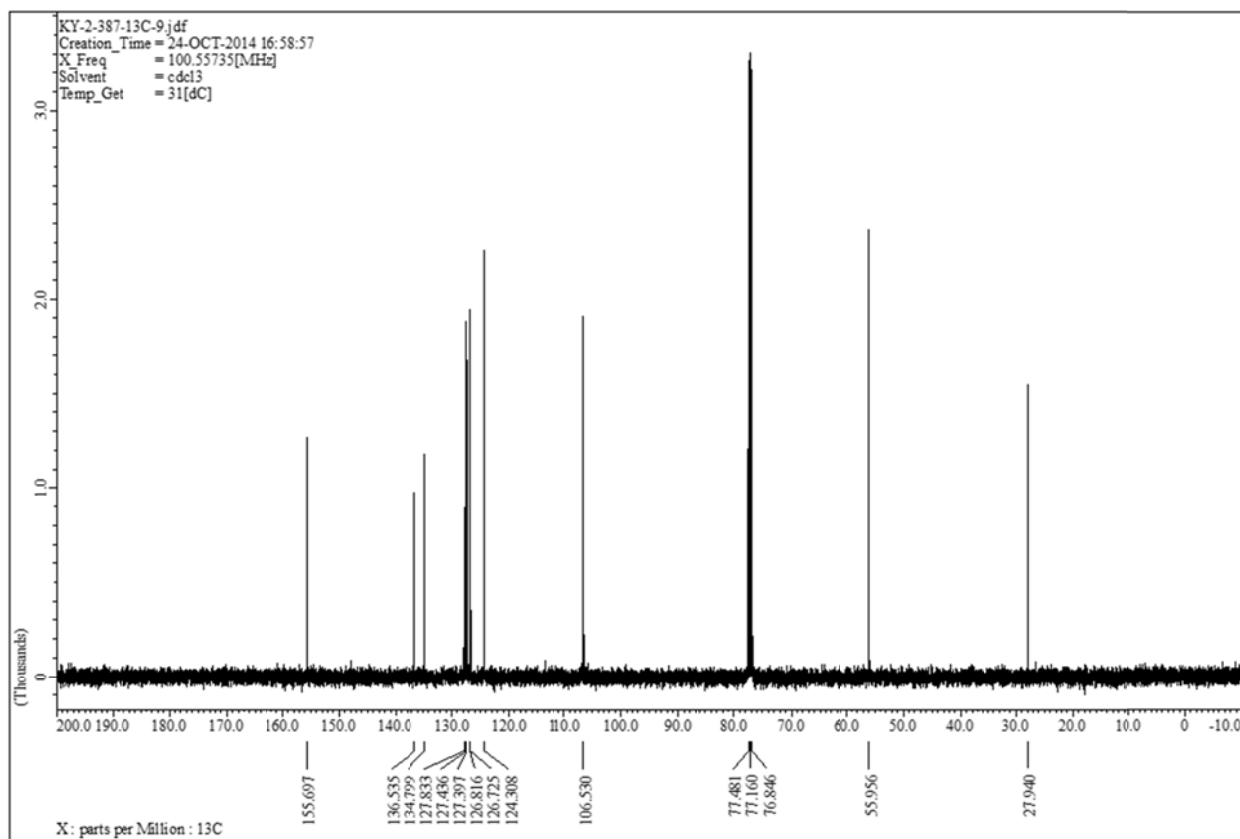

Supplementary Figure 2.  $^1\text{H}$  and  $^{13}\text{C}$ -NMR spectra for 20

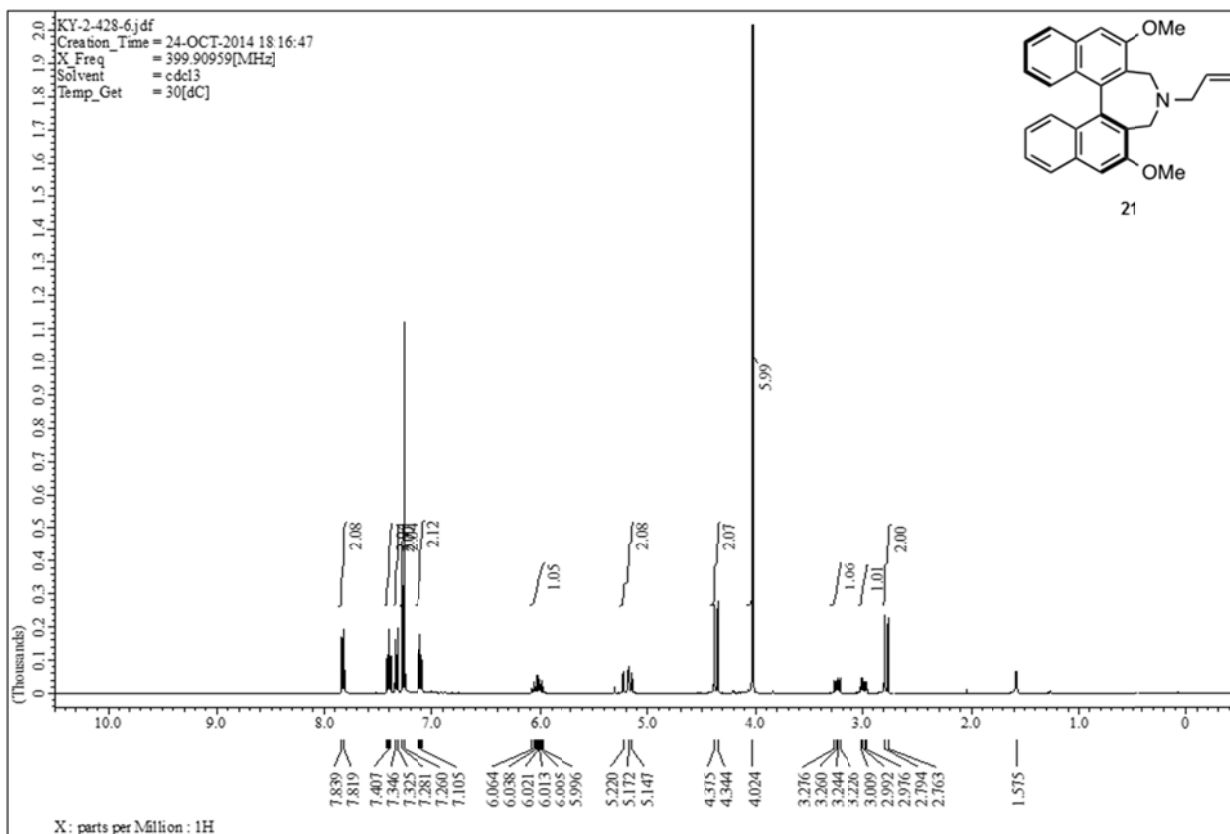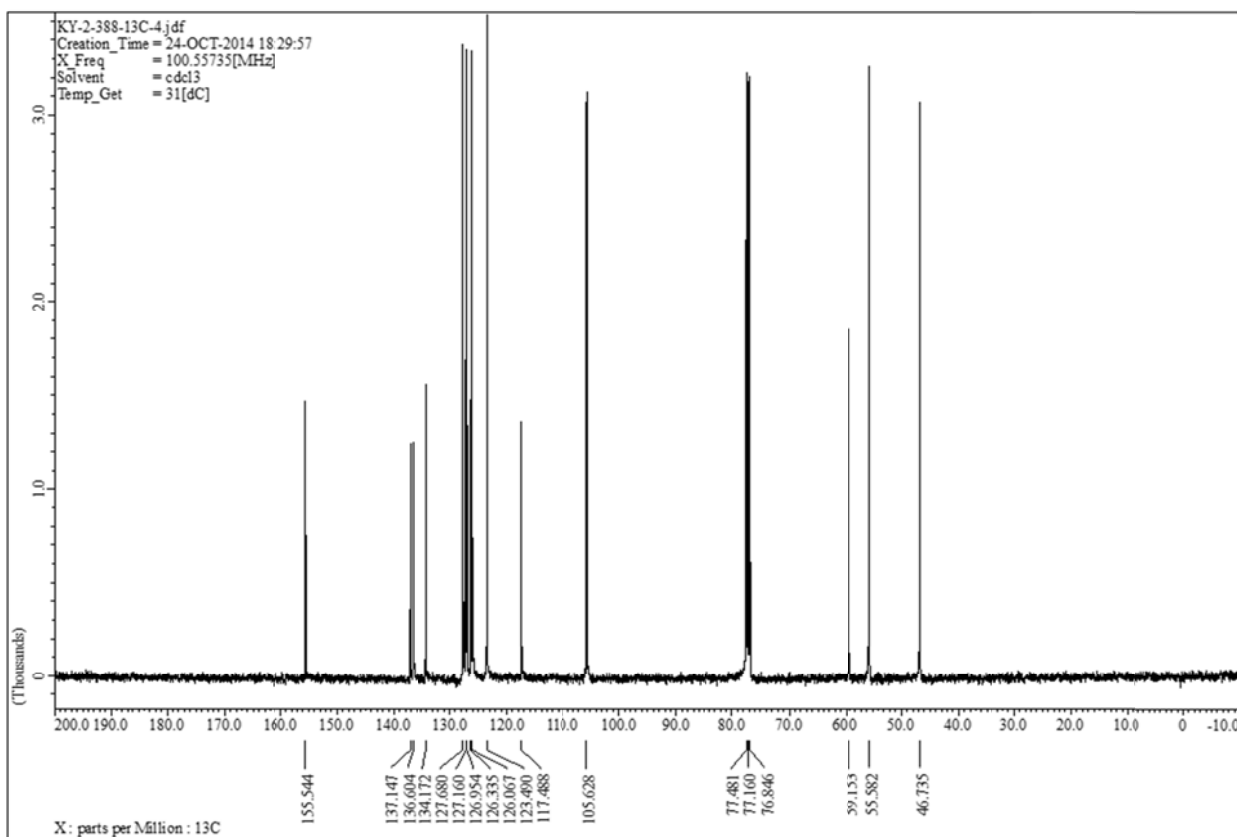

Supplementary Figure 3.  $^1\text{H}$  and  $^{13}\text{C}$ -NMR spectra for 21

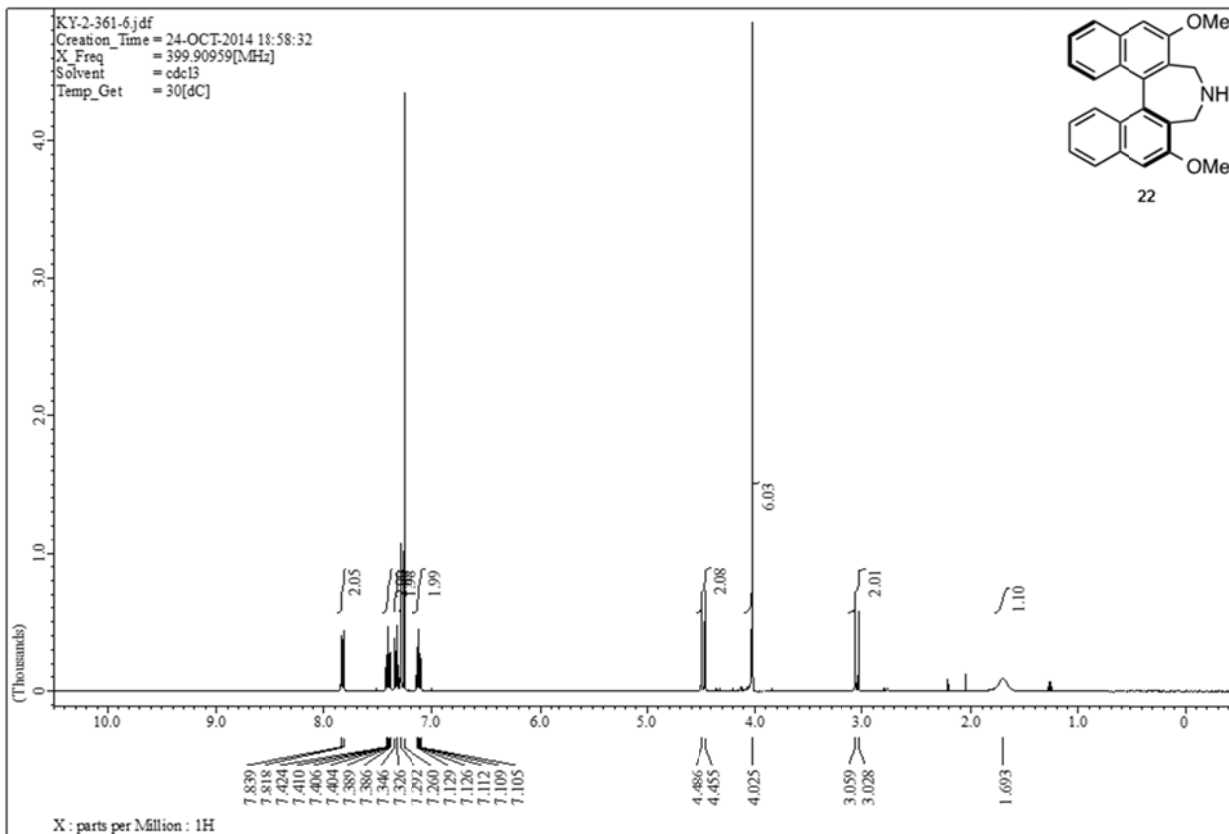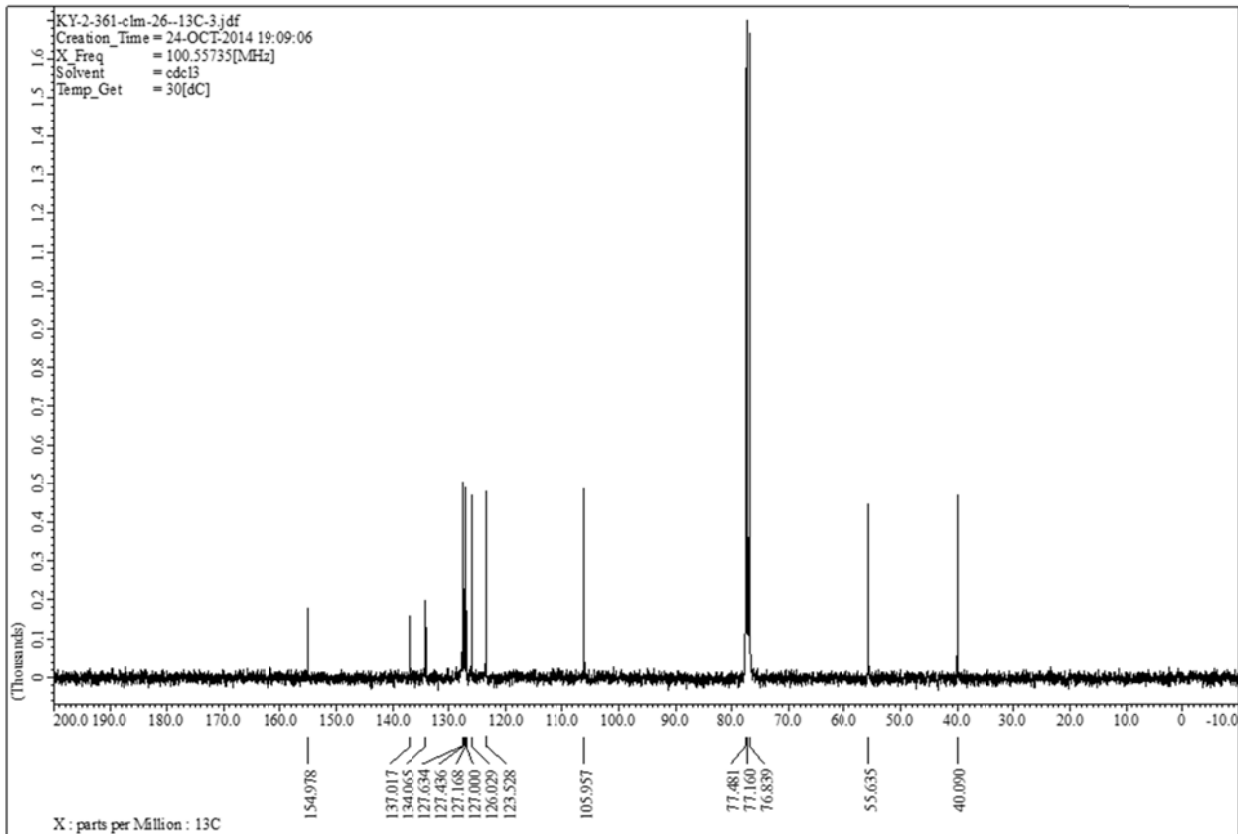

Supplementary Figure 4.  $^1\text{H}$  and  $^{13}\text{C}$ -NMR spectra for 22

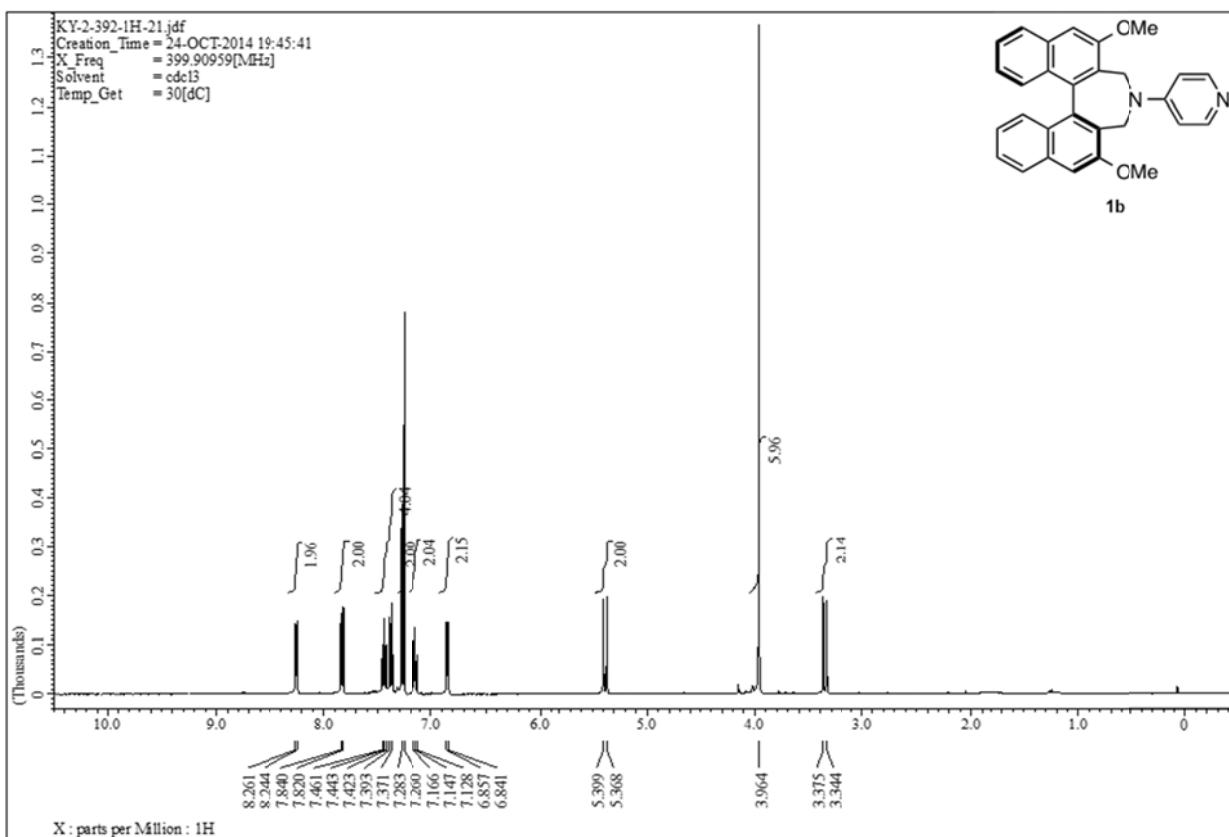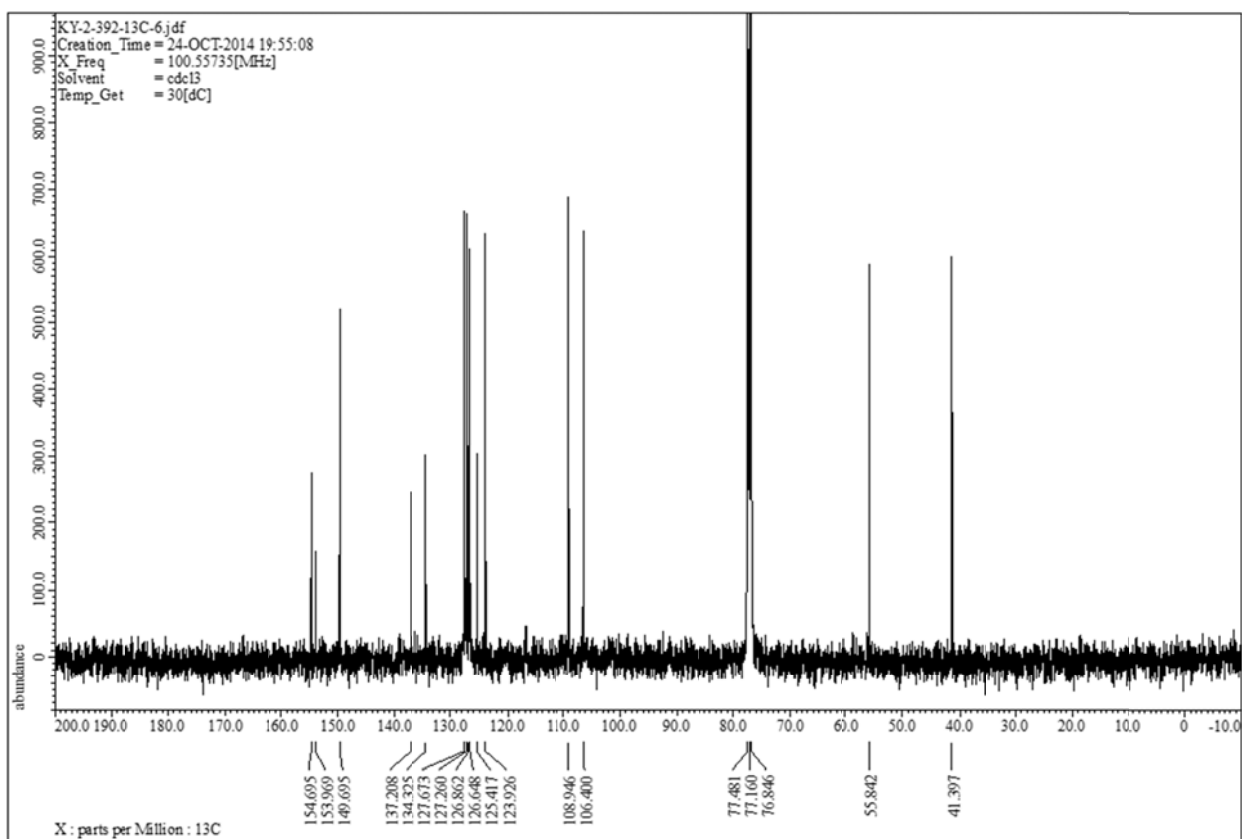

Supplementary Figure 5.  $^1\text{H}$  and  $^{13}\text{C}$ -NMR spectra for catalyst **1b**

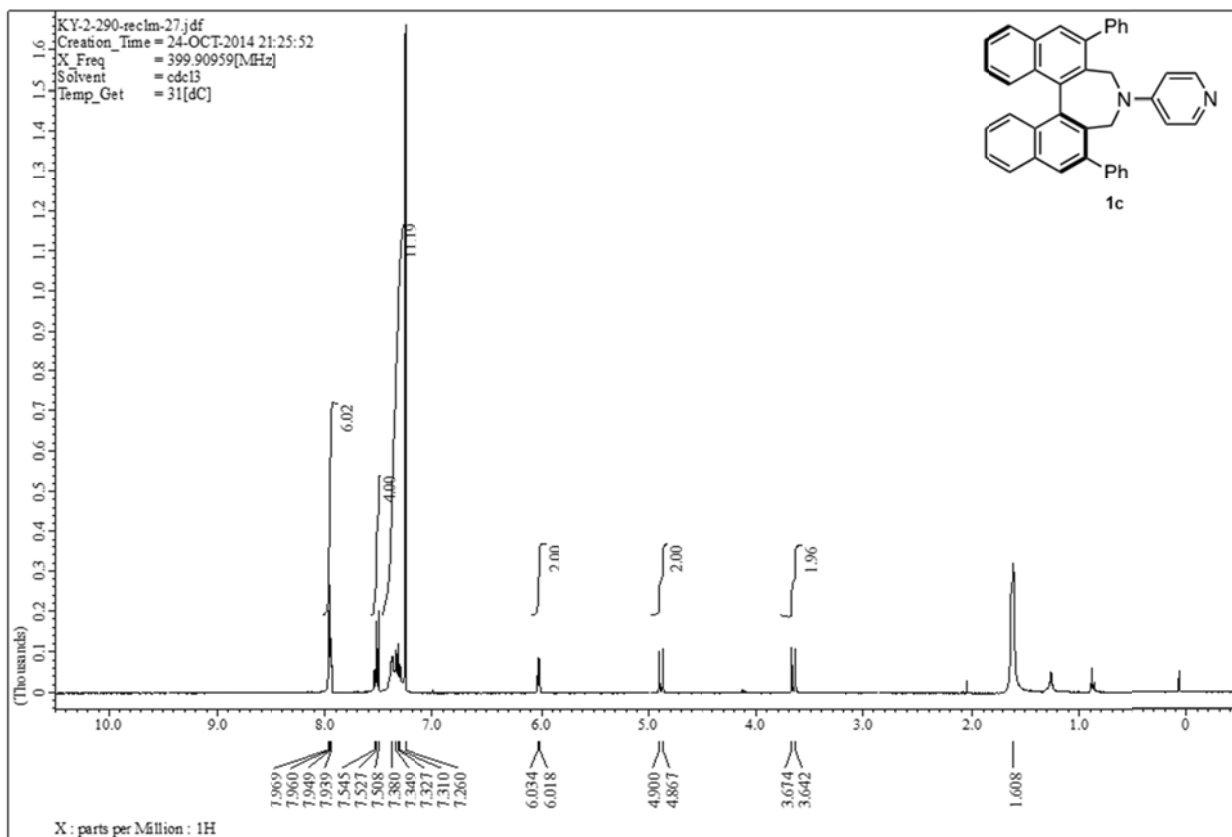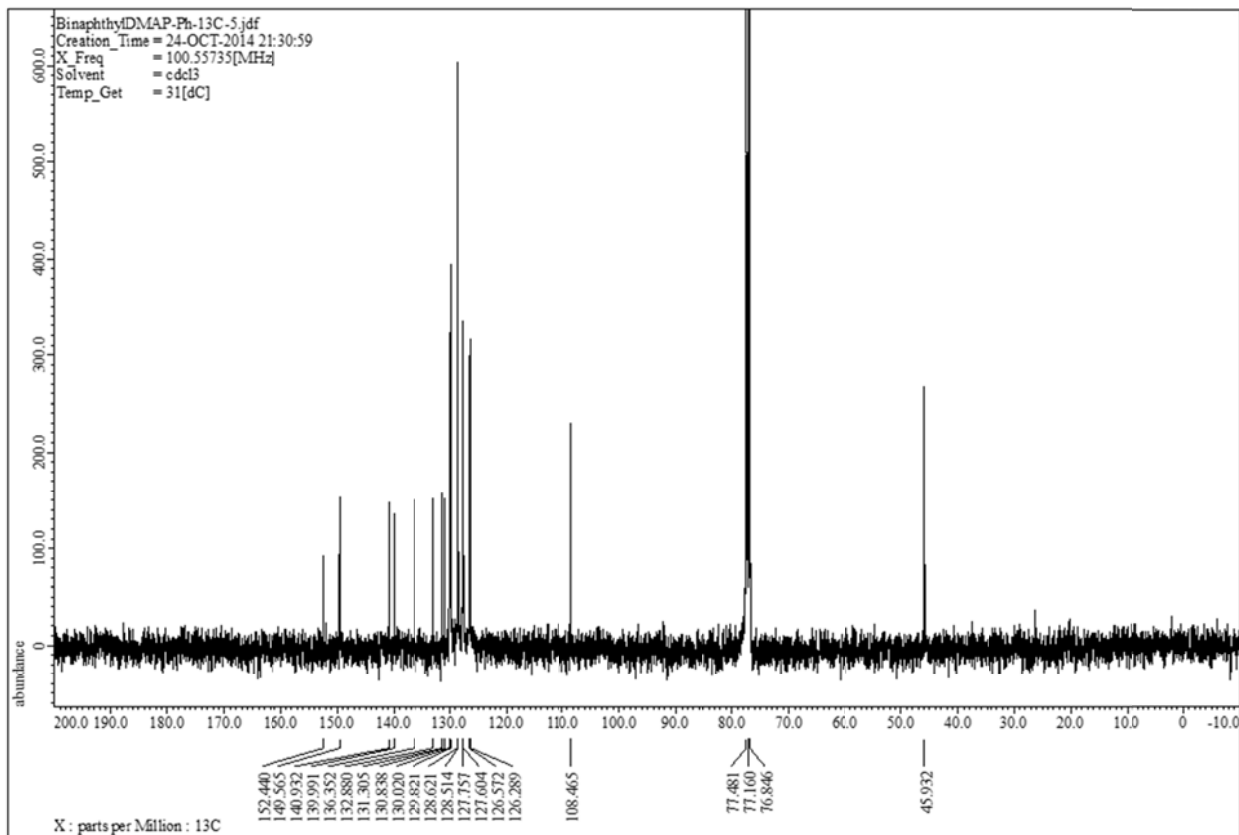

Supplementary Figure 6.  $^1\text{H}$  and  $^{13}\text{C}$ -NMR spectra for catalyst **1c**



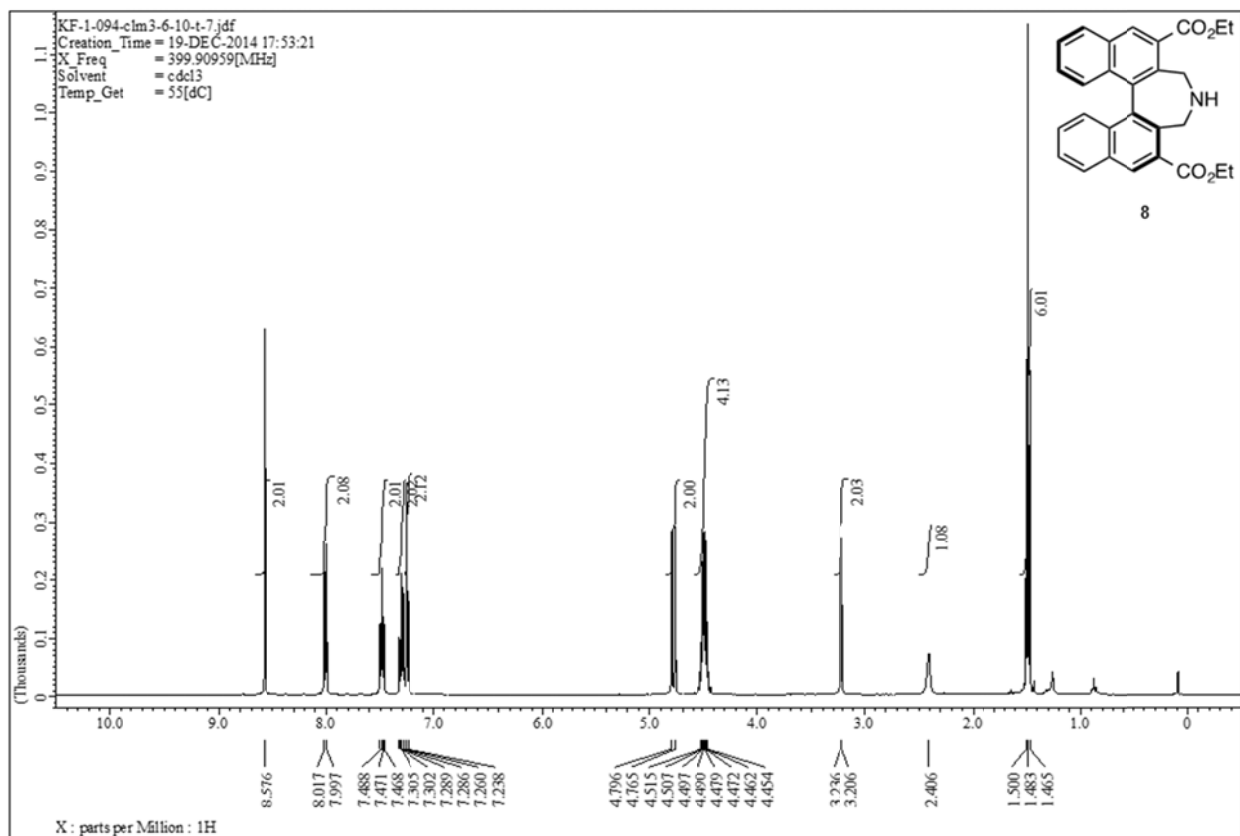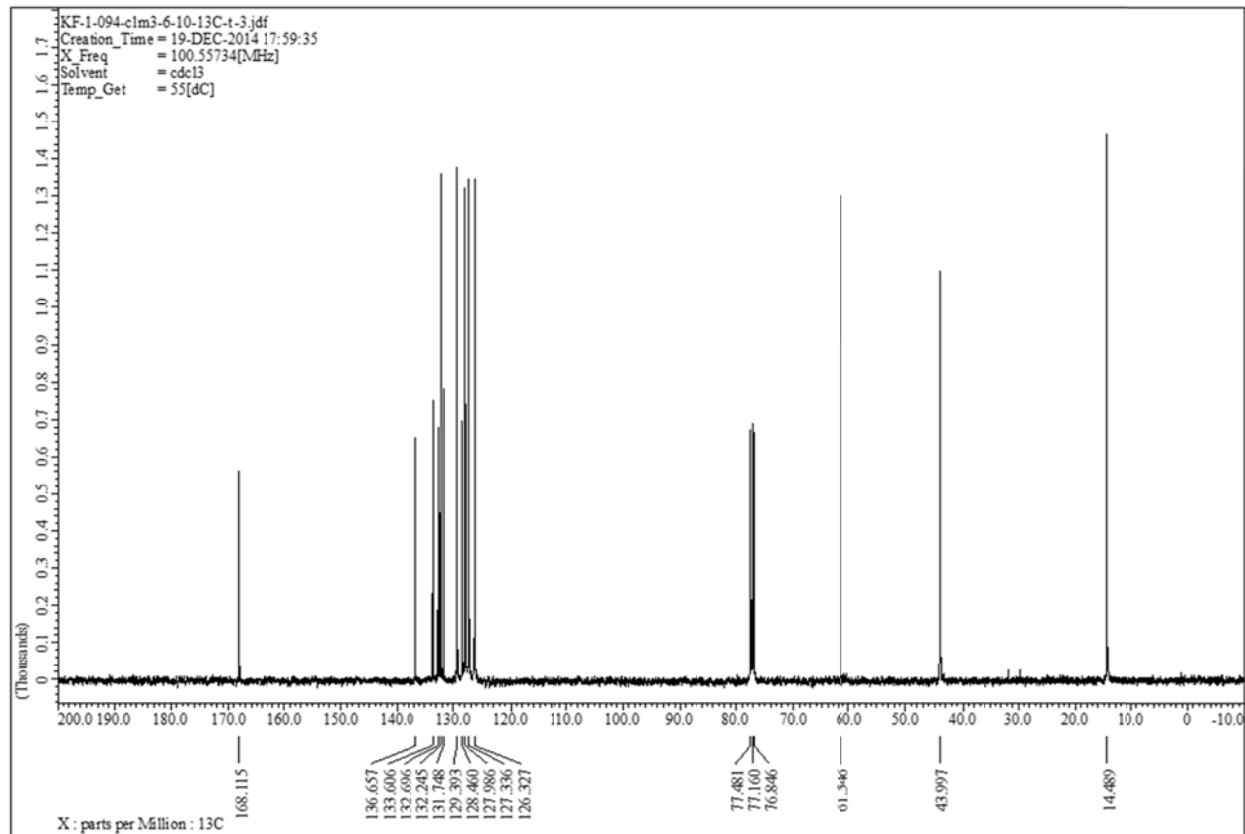

Supplementary Figure 8.  $^1\text{H}$  and  $^{13}\text{C}$ -NMR spectra for **8**



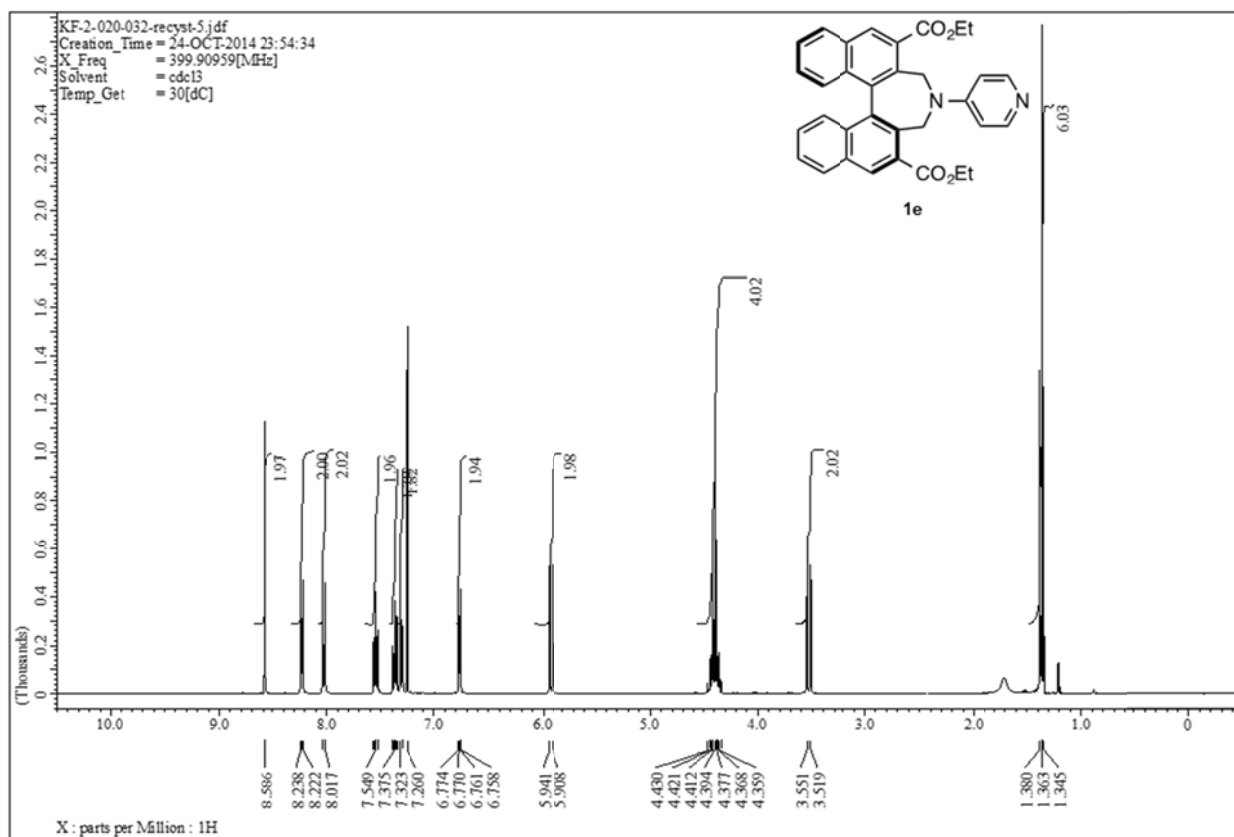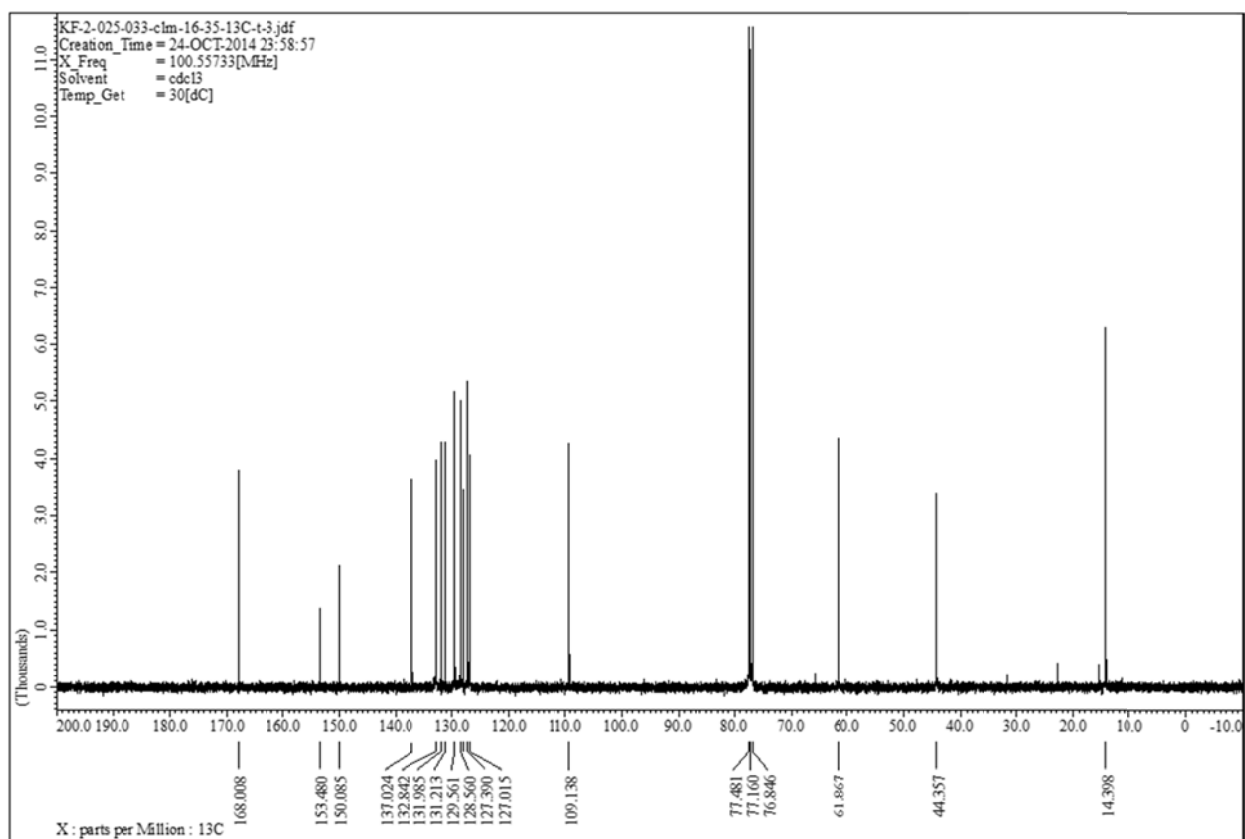

Supplementary Figure 9.  $^1\text{H}$  and  $^{13}\text{C}$ -NMR spectra for catalyst **1e**

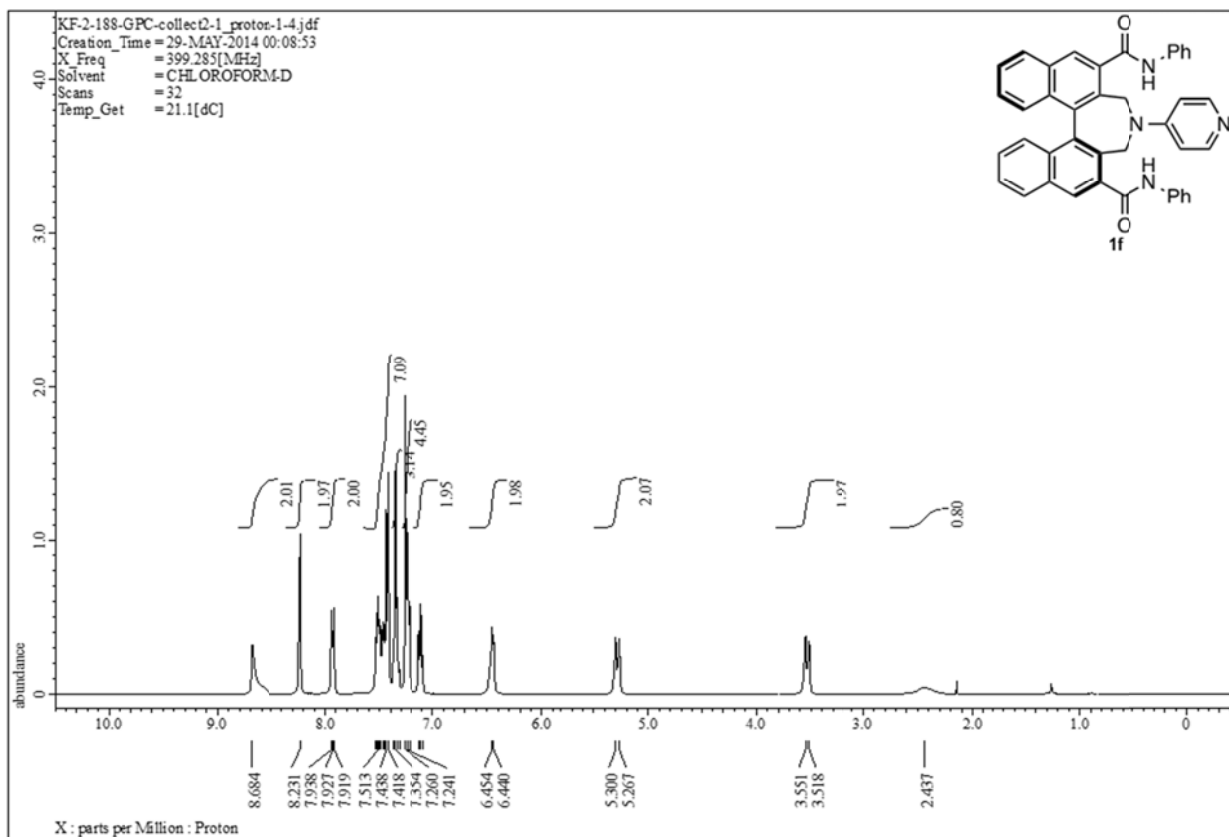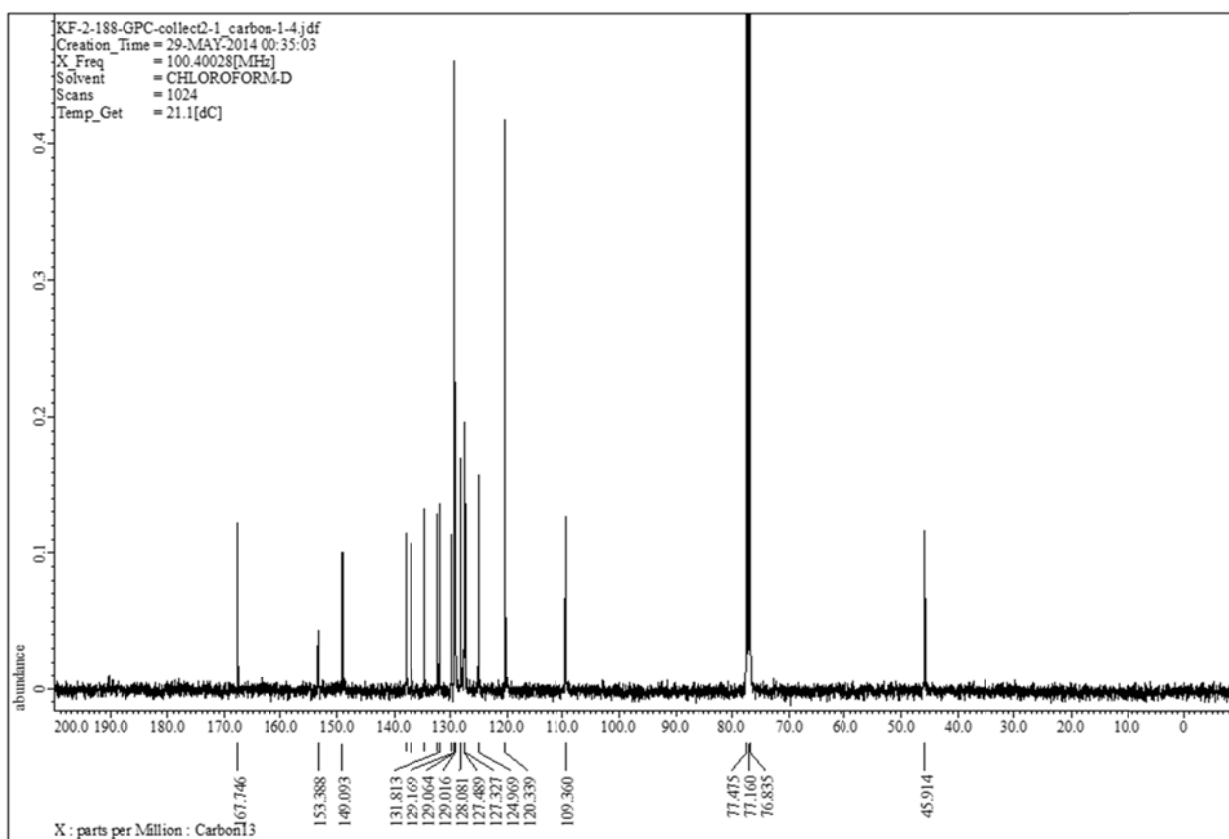

Supplementary Figure 10.  $^1\text{H}$  and  $^{13}\text{C}$ -NMR spectra for catalyst **1f**

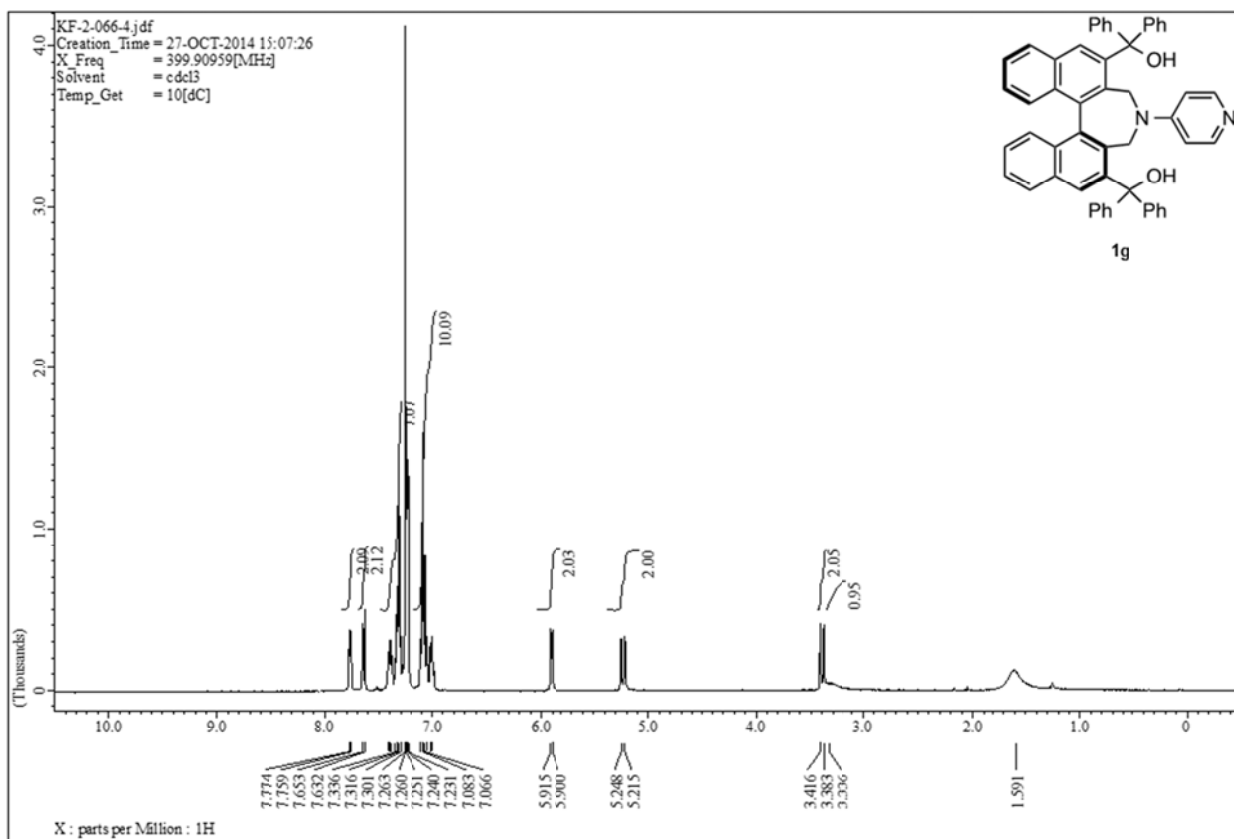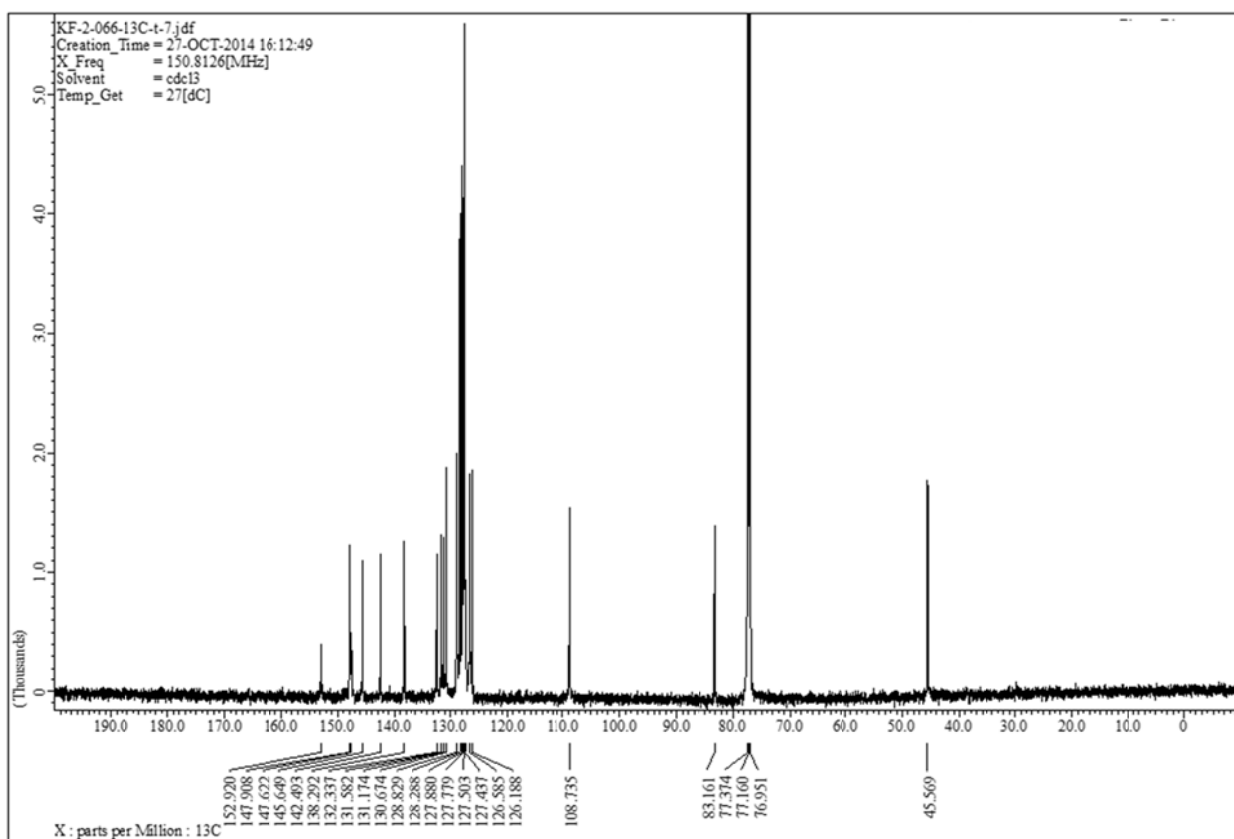

Supplementary Figure 11.  $^1\text{H}$  and  $^{13}\text{C}$ -NMR spectra for catalyst **1g**

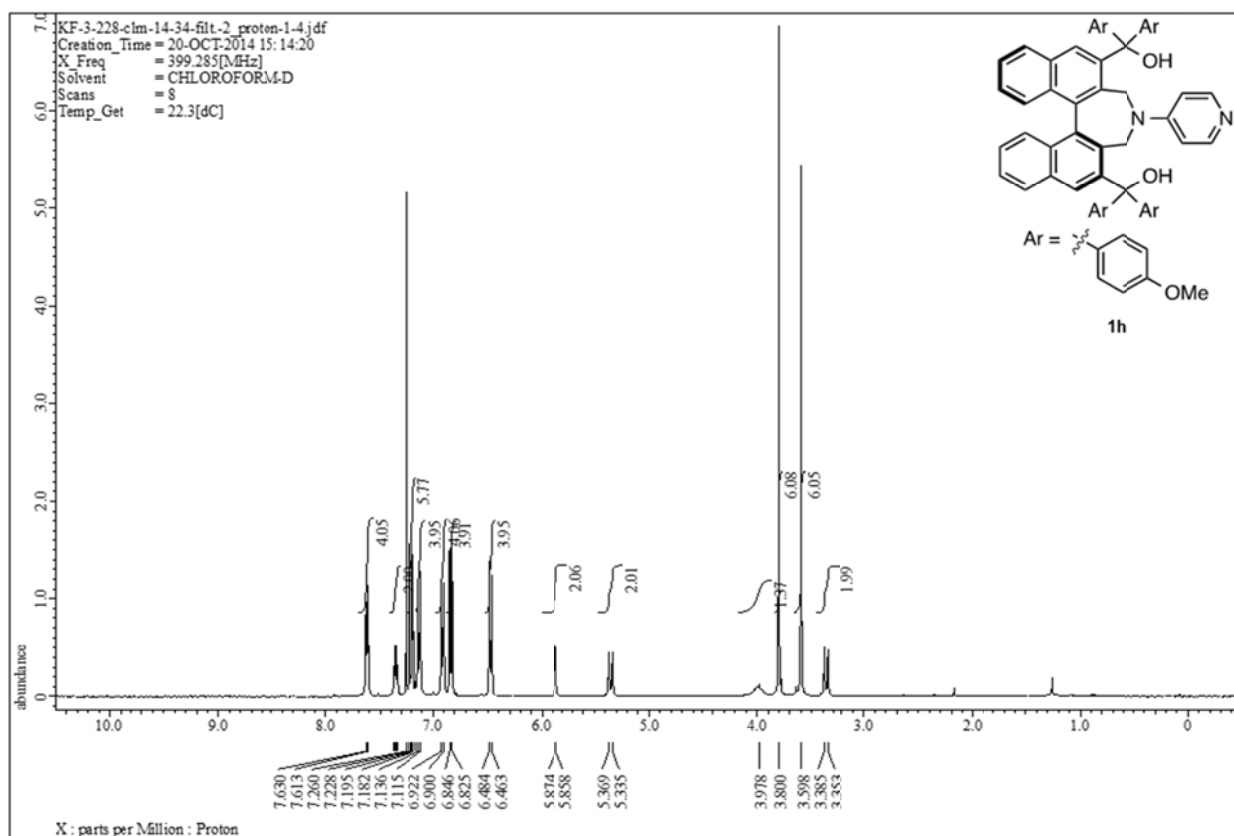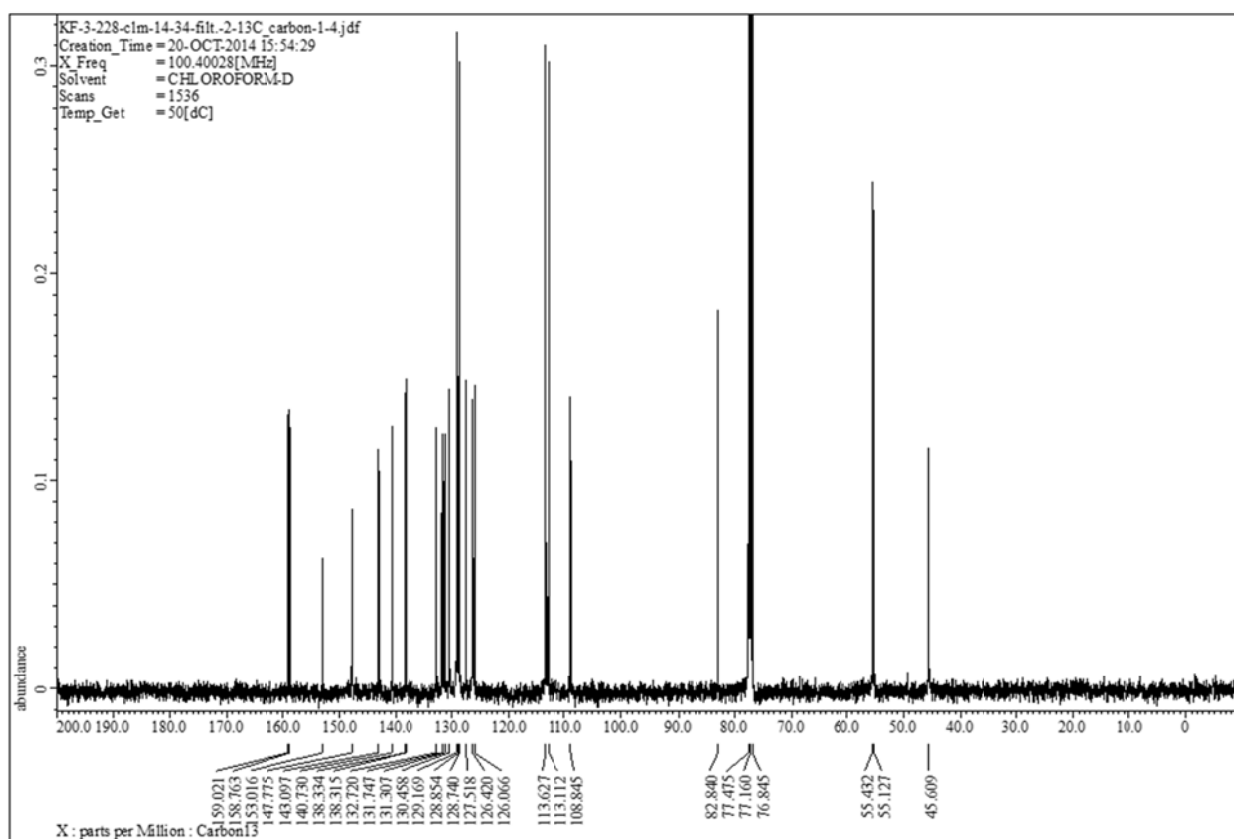

Supplementary Figure 12.  $^1\text{H}$  and  $^{13}\text{C}$ -NMR spectra for catalyst **1h**

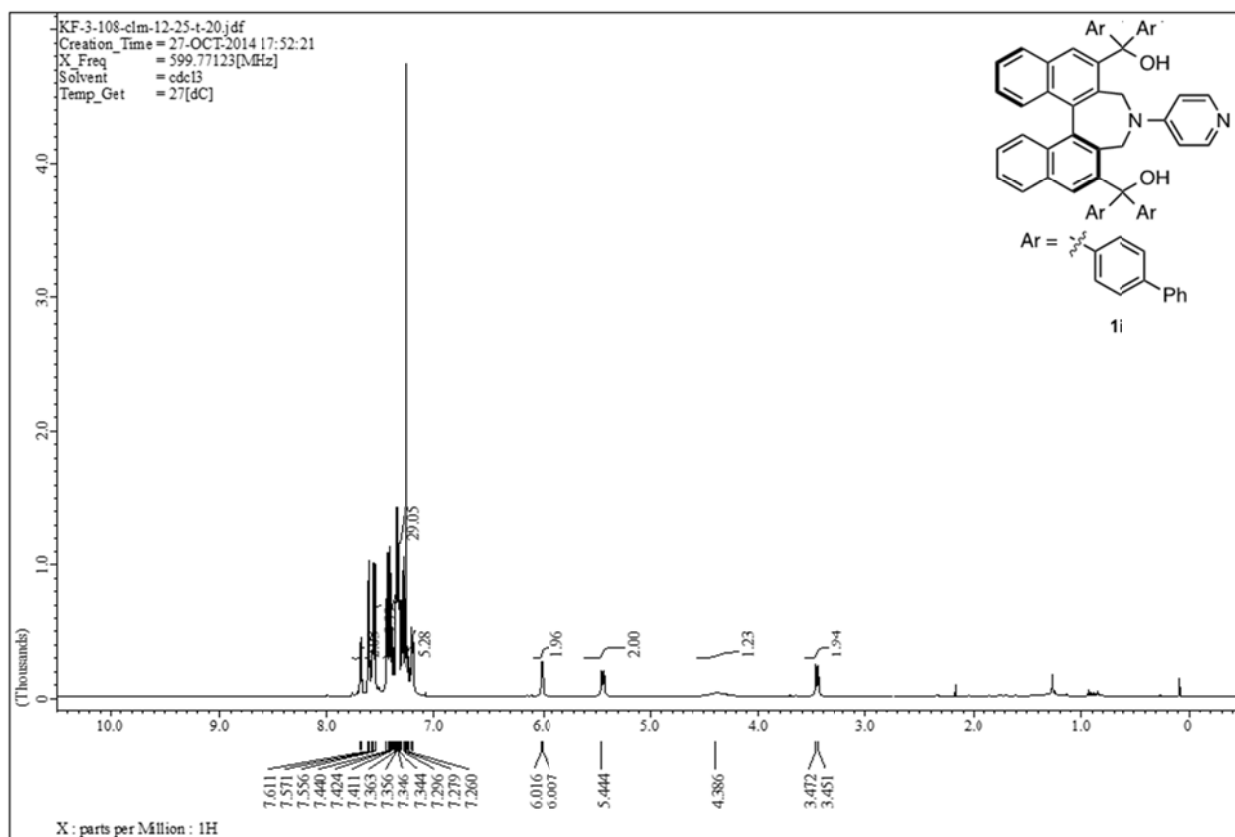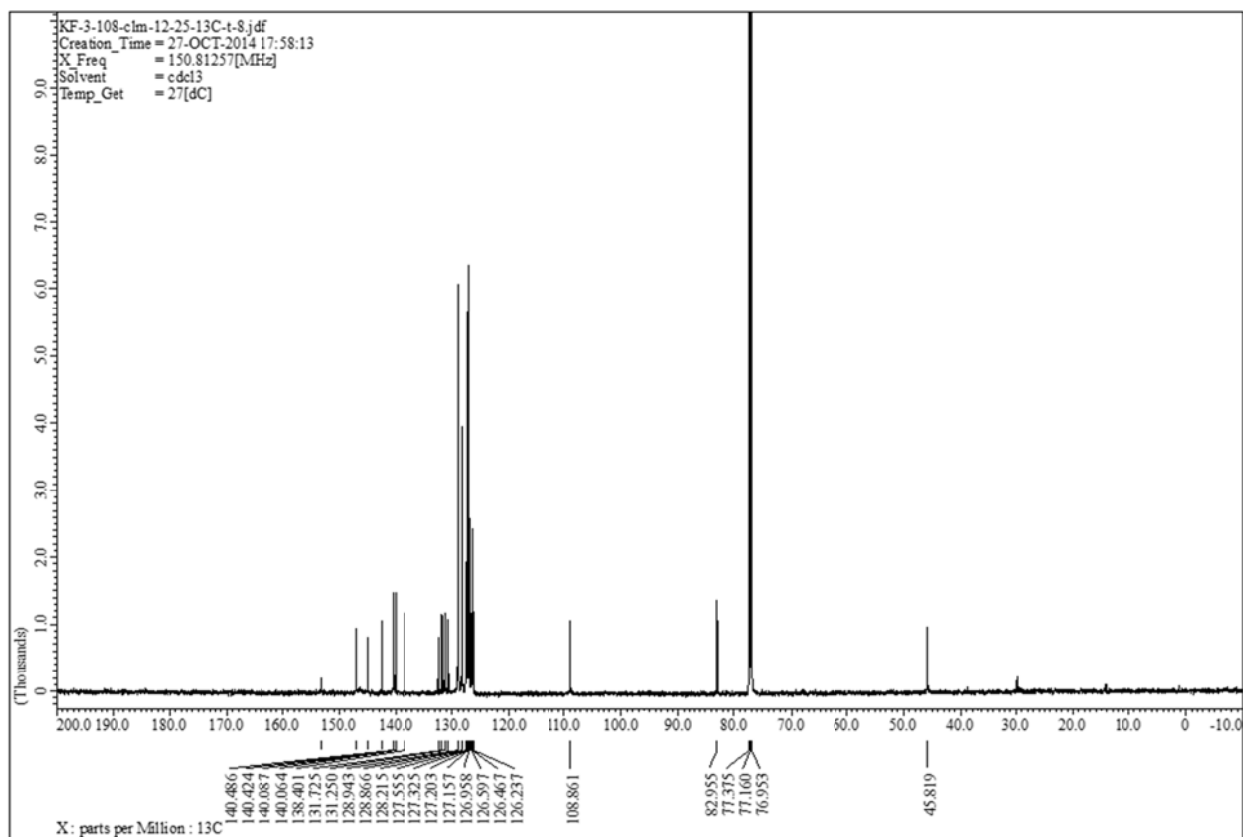

Supplementary Figure 13.  $^1\text{H}$  and  $^{13}\text{C}$ -NMR spectra for catalyst **1i**

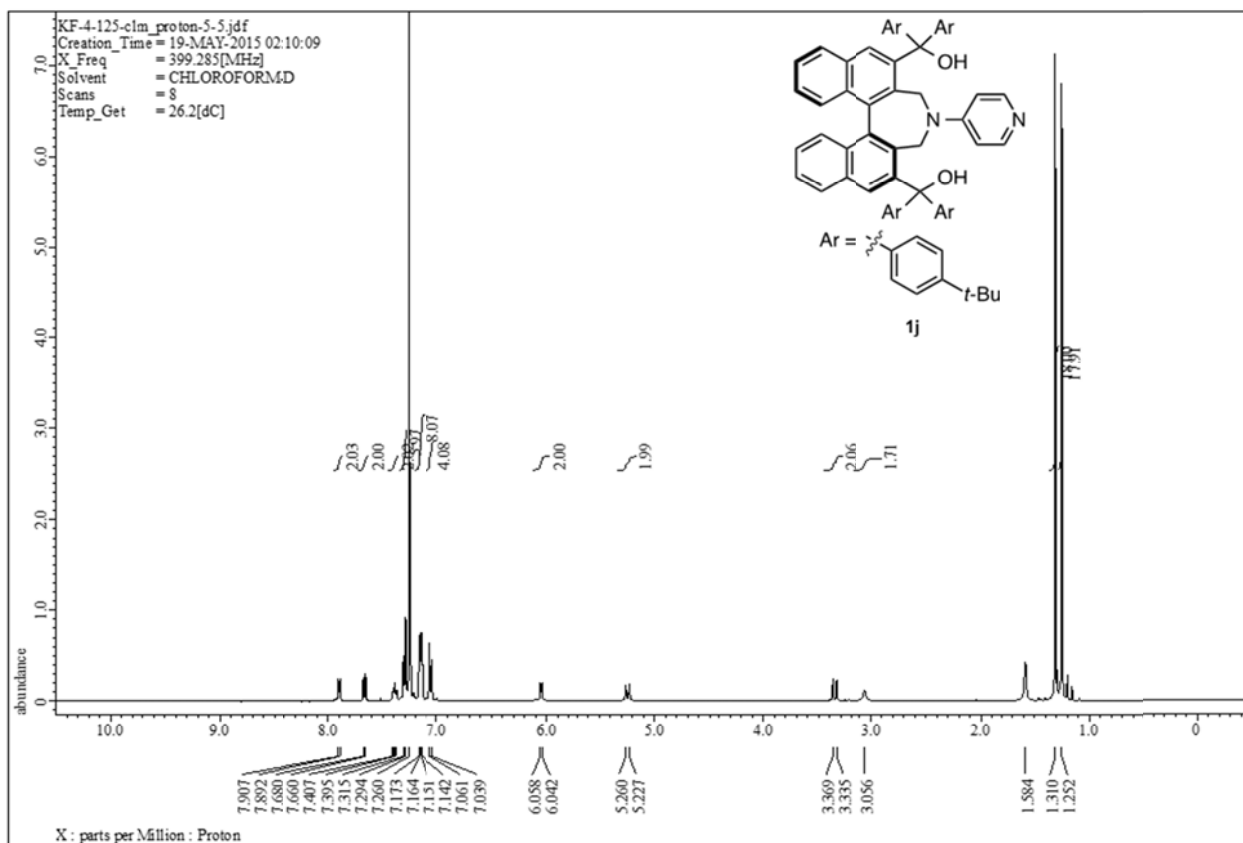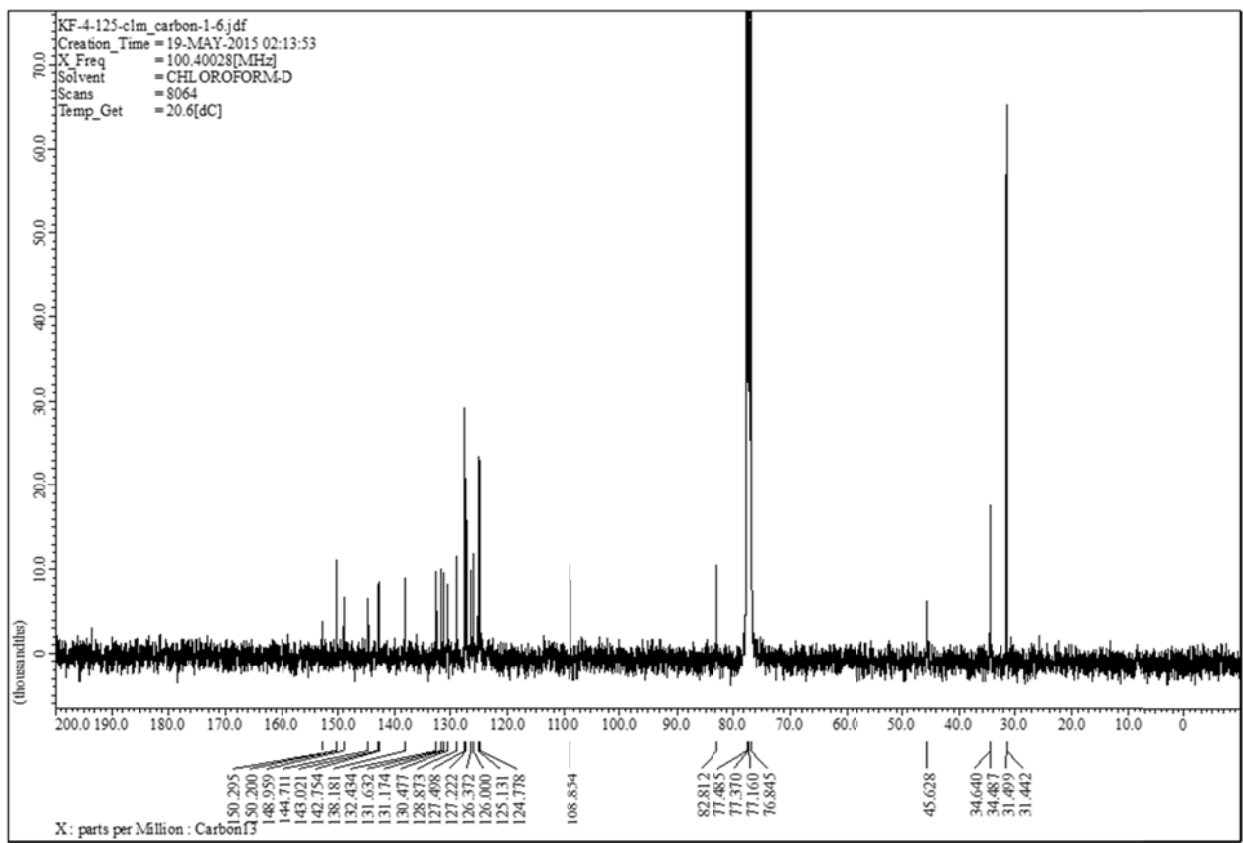

Supplementary Figure 14.  $^1\text{H}$  and  $^{13}\text{C}$ -NMR spectra for catalyst **1j**

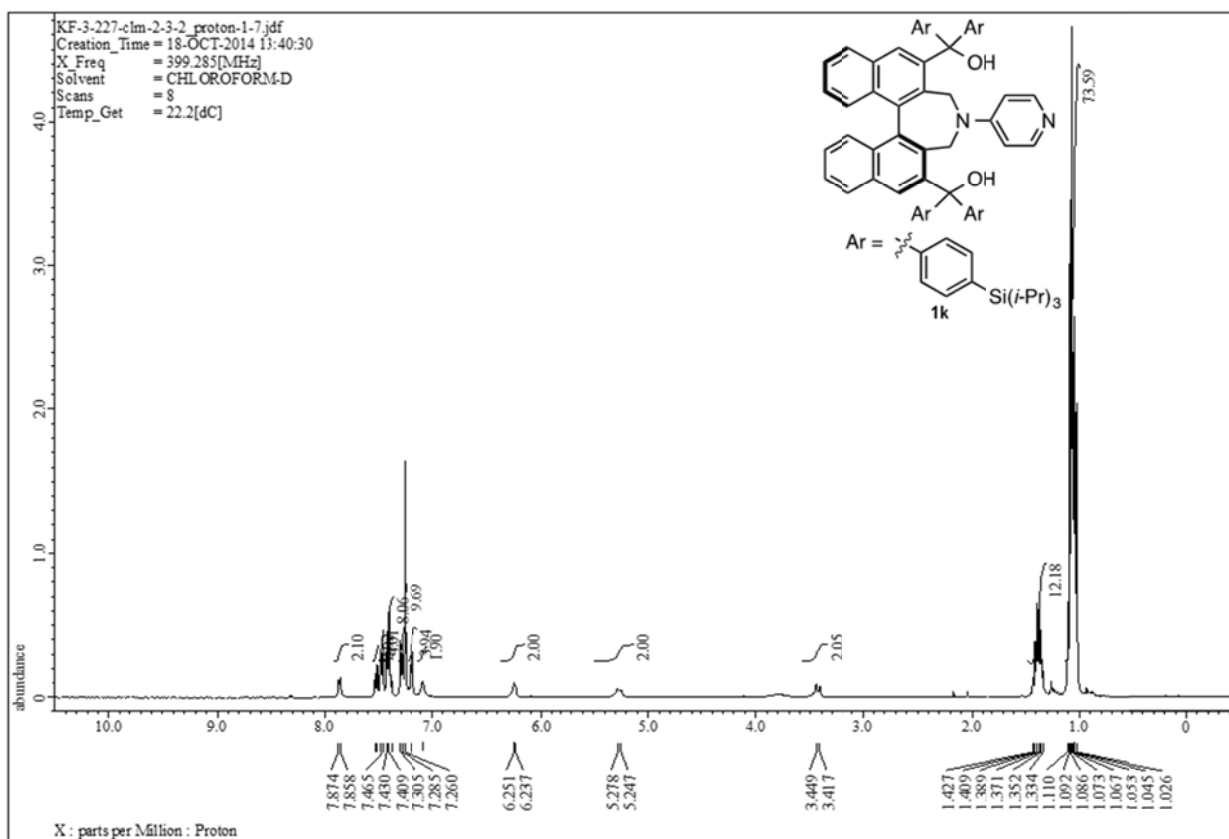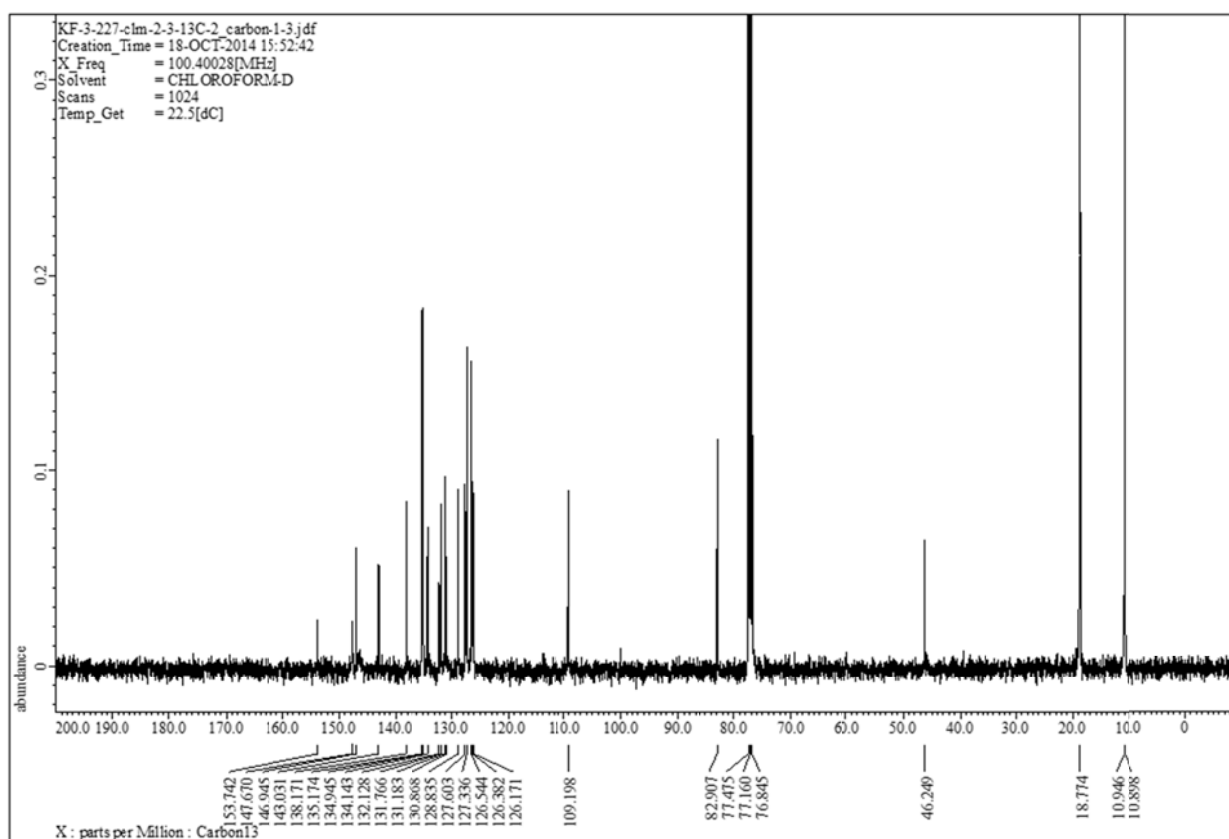

Supplementary Figure 15.  $^1\text{H}$  and  $^{13}\text{C}$ -NMR spectra for catalyst **1k**

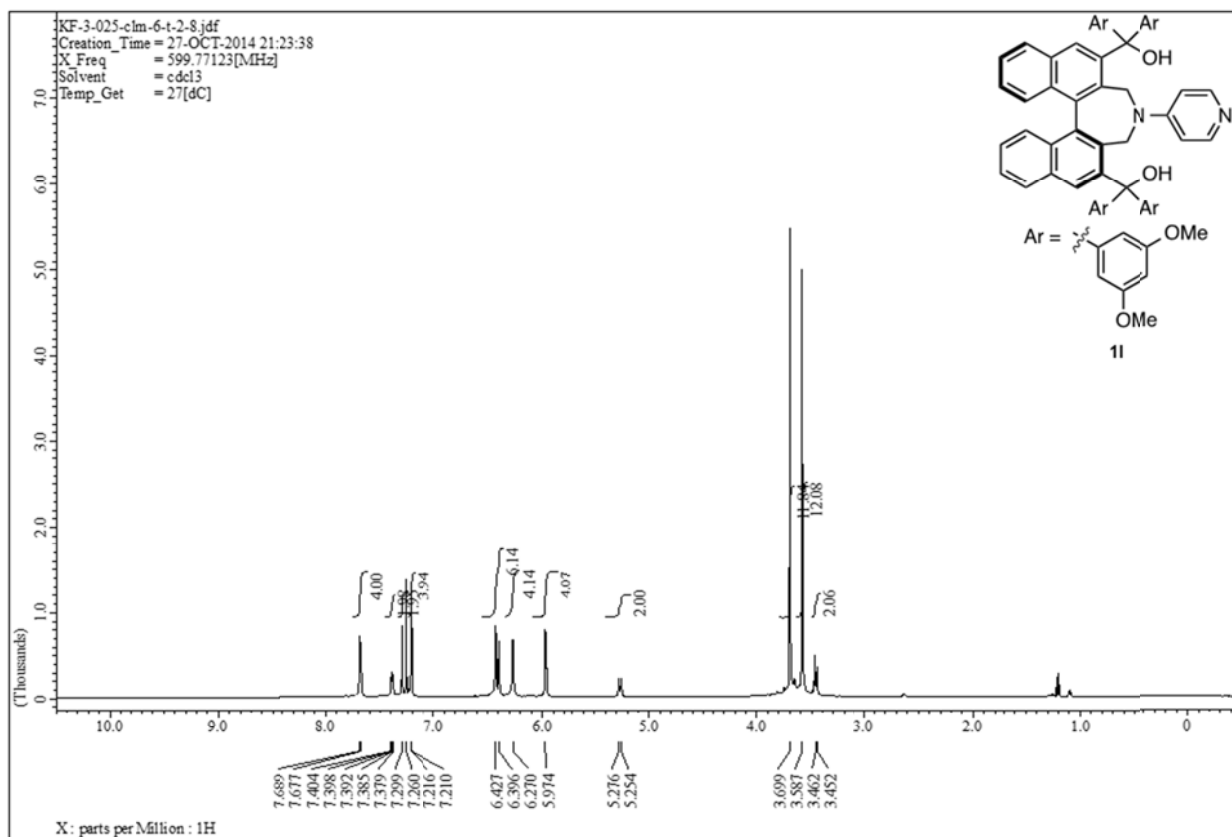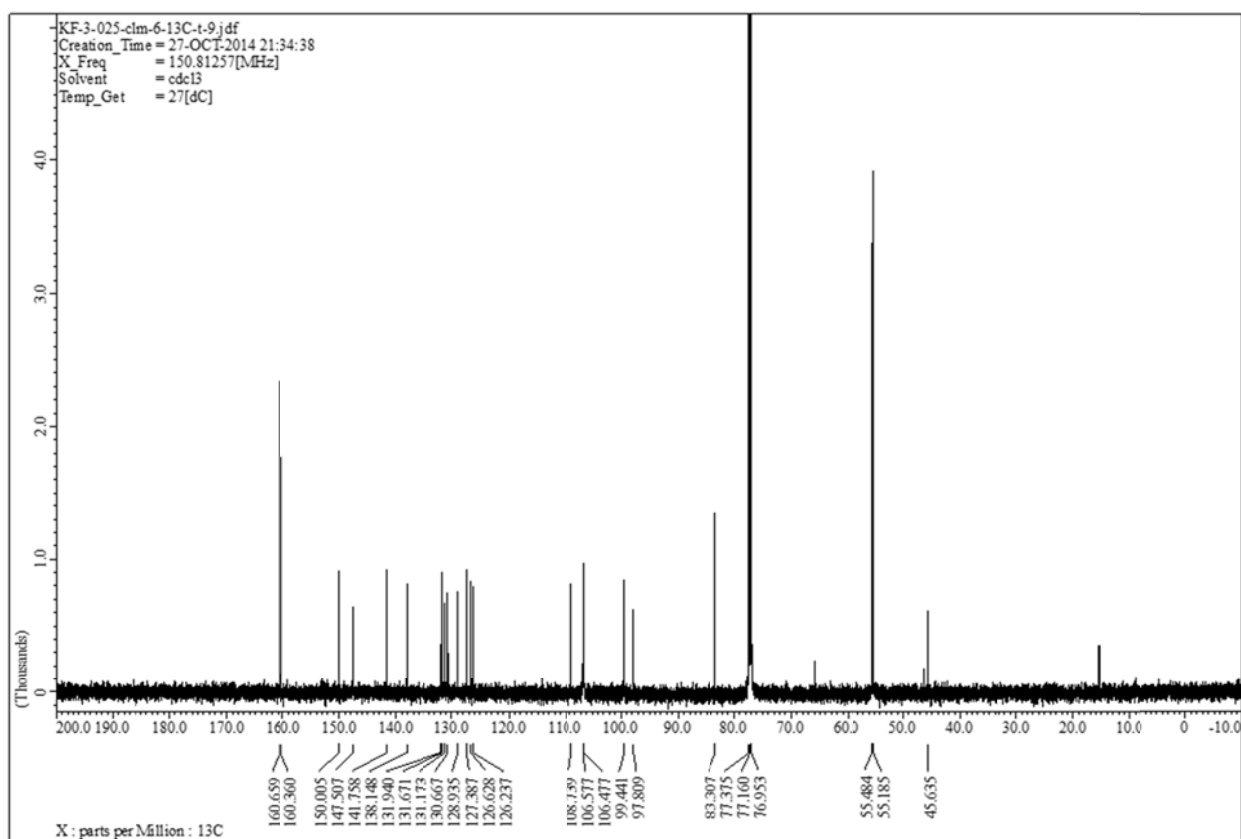

Supplementary Figure 16.  $^1\text{H}$  and  $^{13}\text{C}$ -NMR spectra for catalyst 11



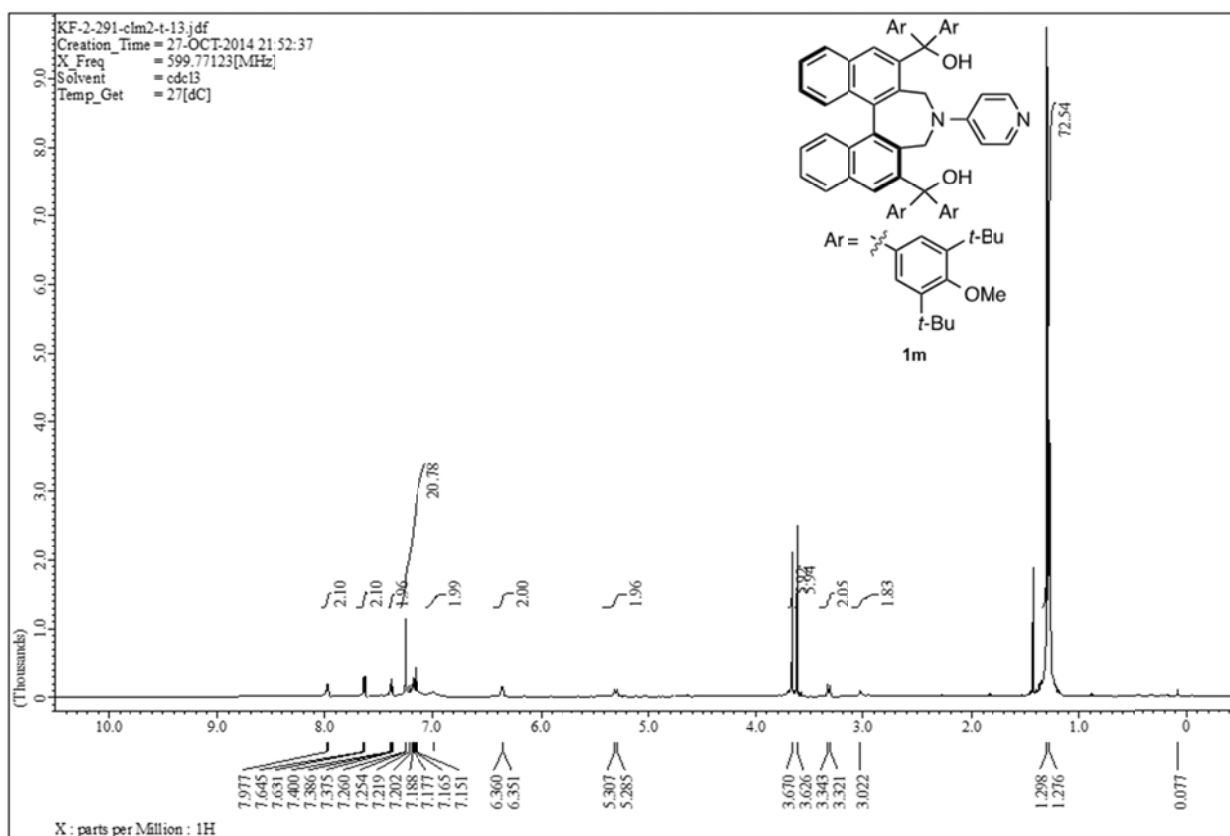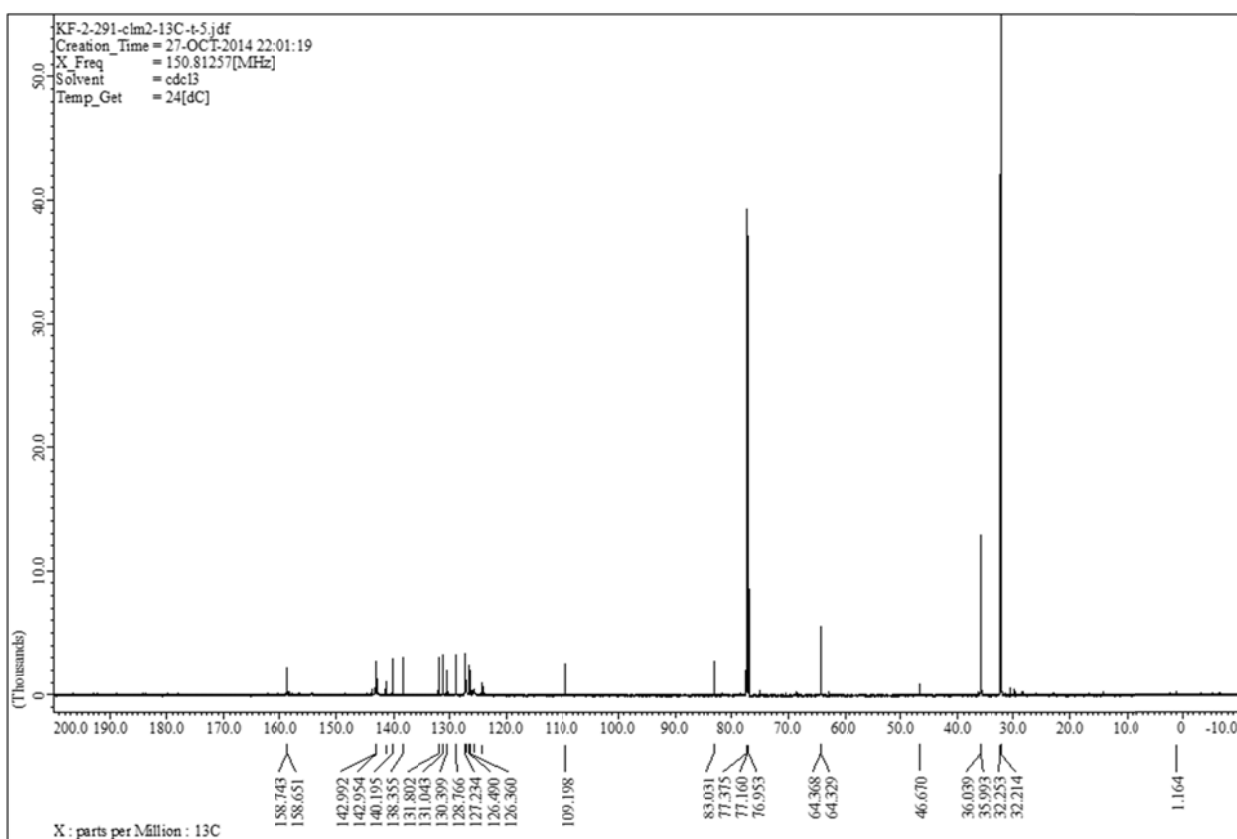

Supplementary Figure 17.  $^1\text{H}$  and  $^{13}\text{C}$ -NMR spectra for catalyst **1m**

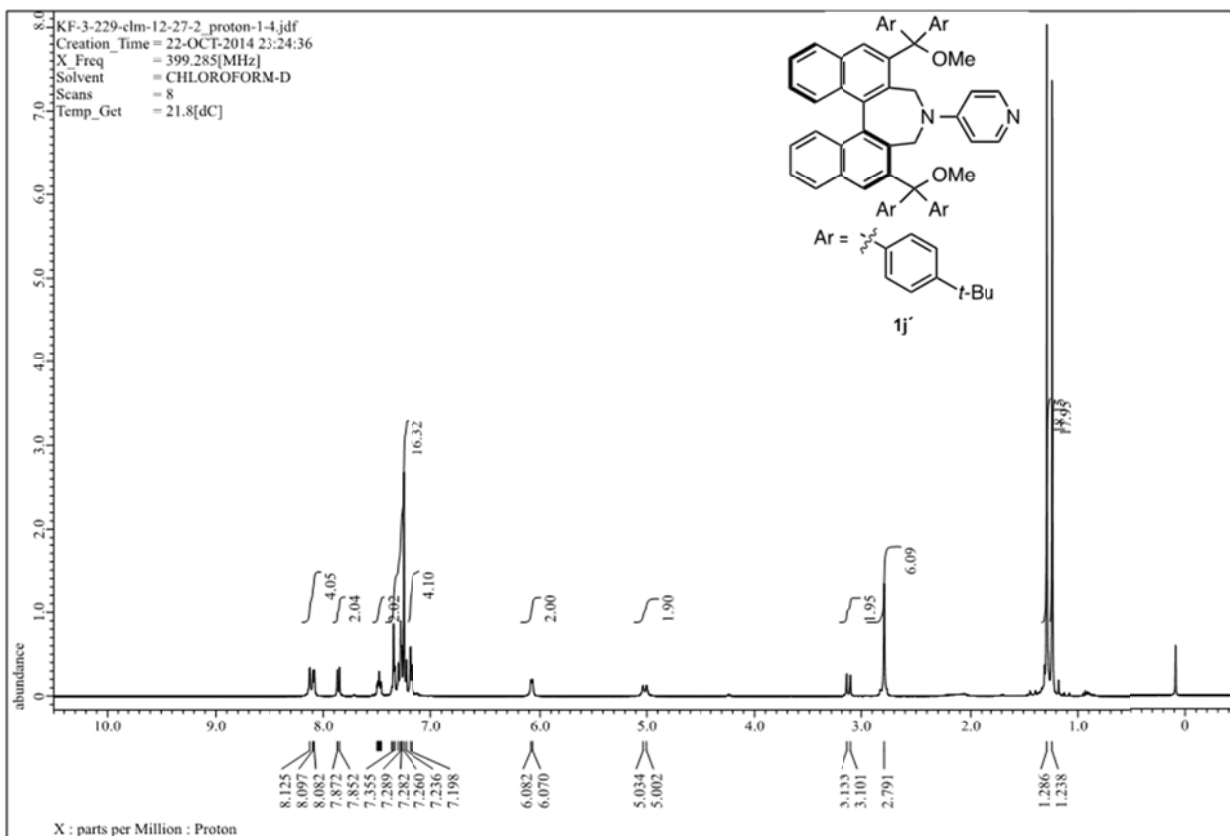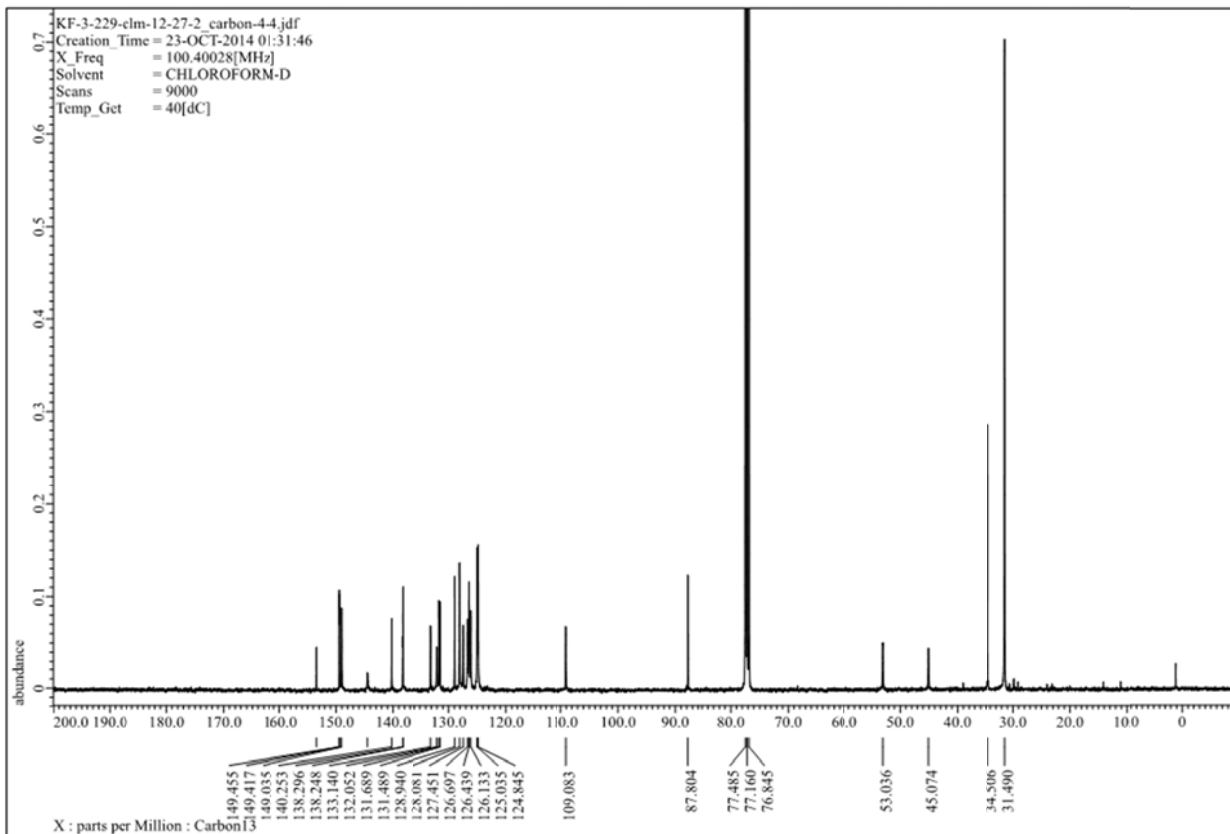

Supplementary Figure 18.  $^1\text{H}$  and  $^{13}\text{C}$ -NMR spectra for catalyst **1j'**

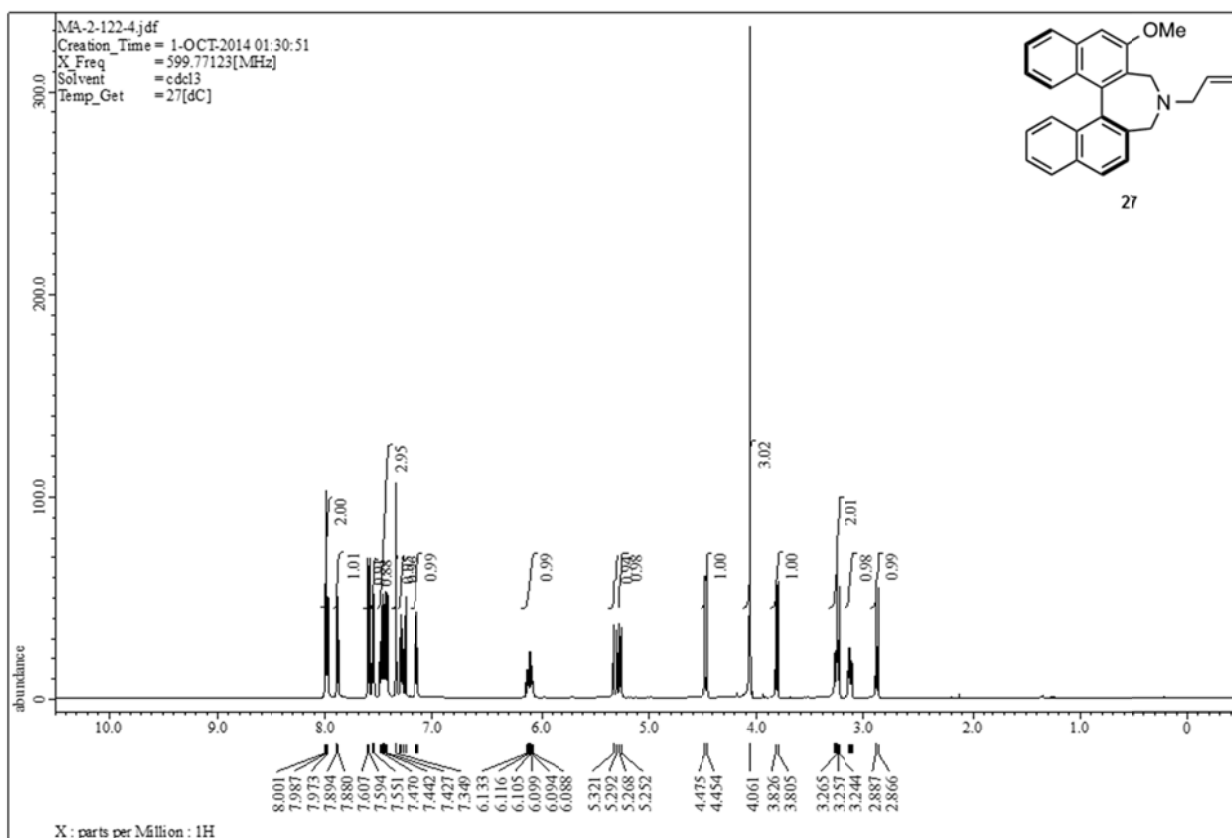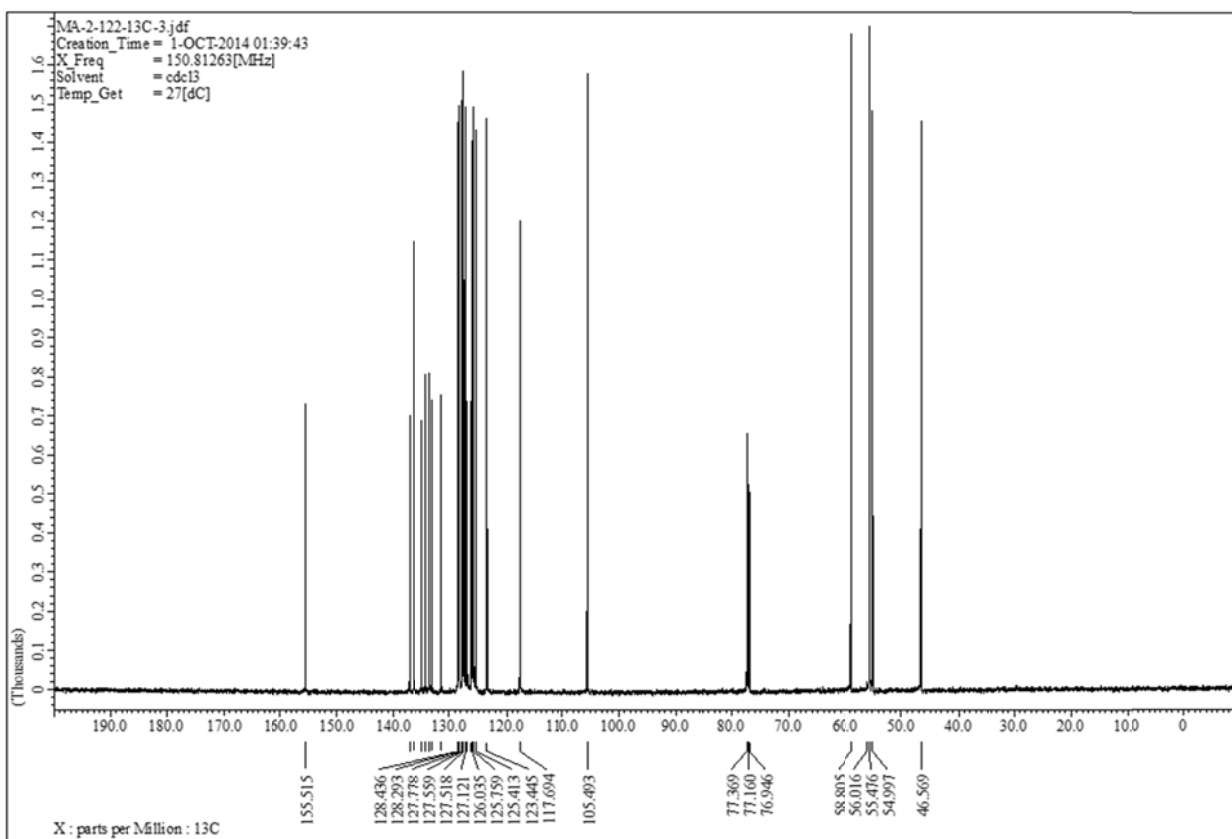

Supplementary Figure 19.  $^1\text{H}$  and  $^{13}\text{C}$ -NMR spectra for 27

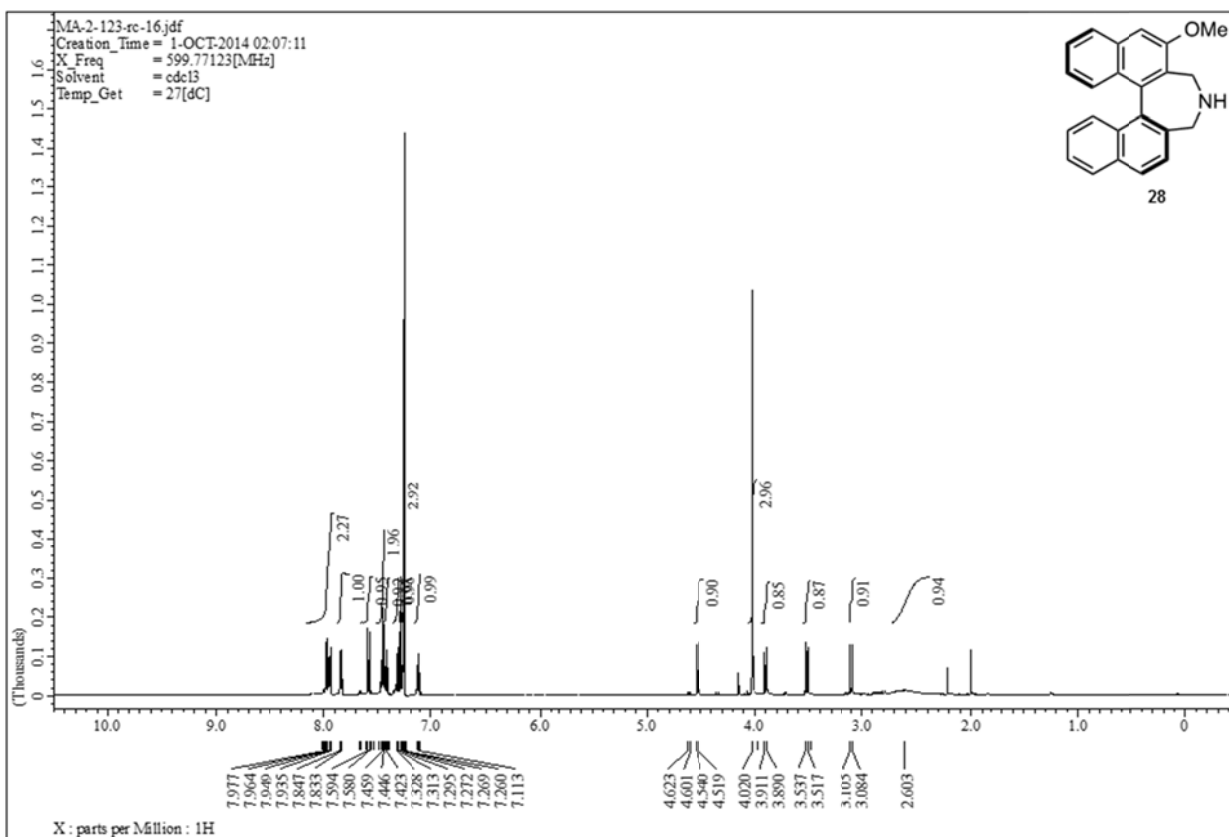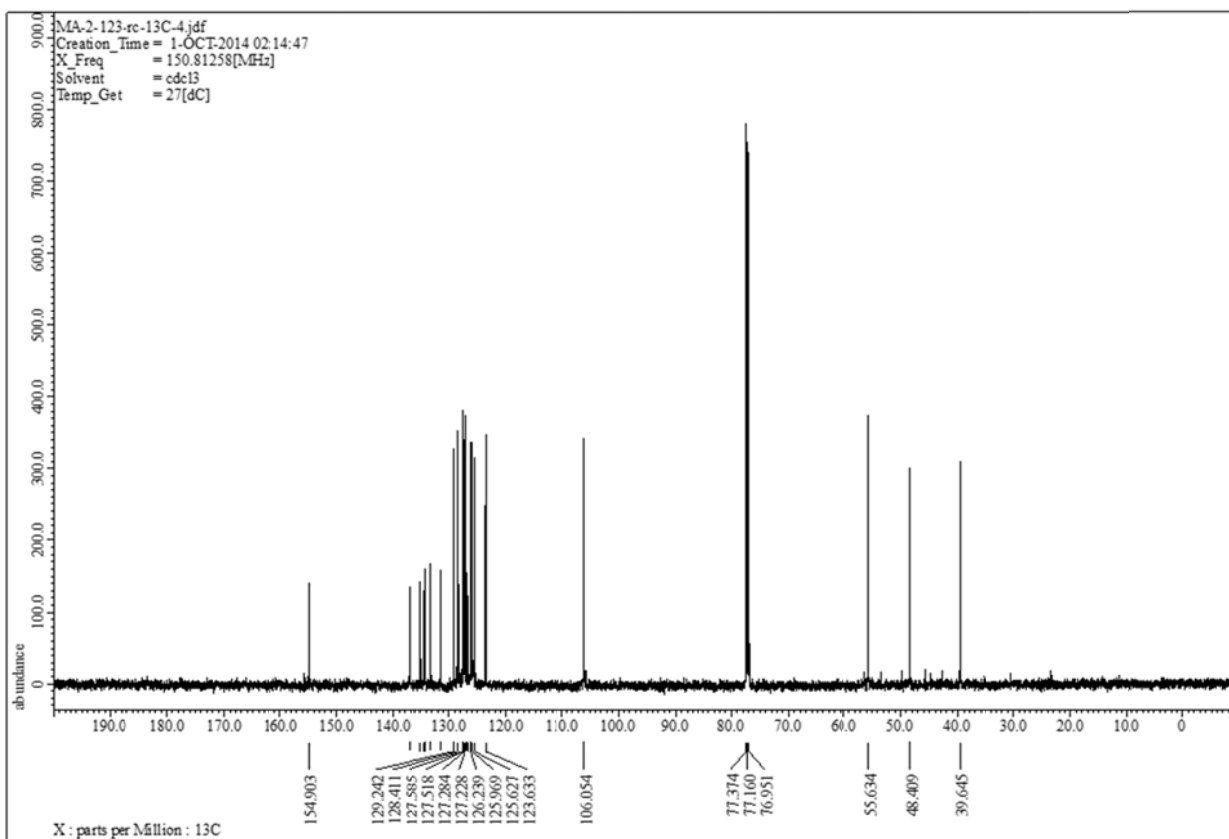

Supplementary Figure 20.  $^1\text{H}$  and  $^{13}\text{C}$ -NMR spectra for 28

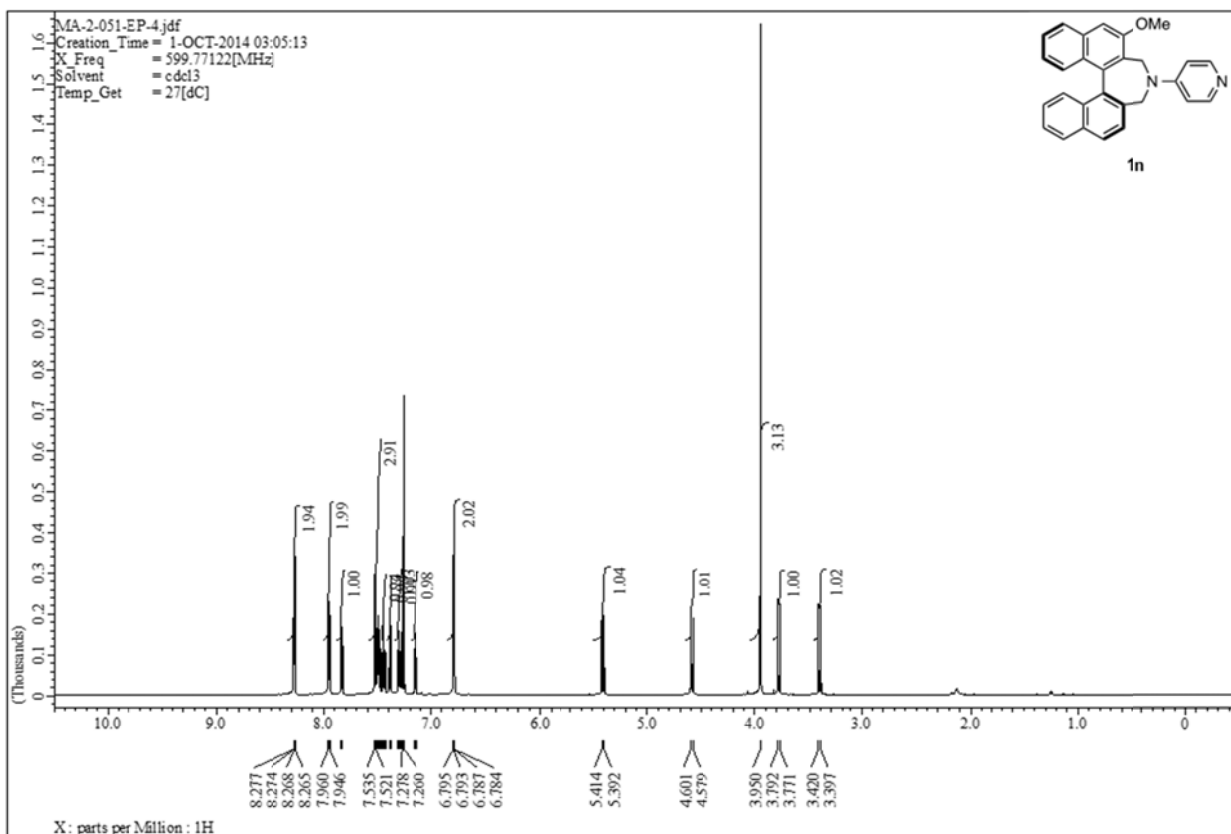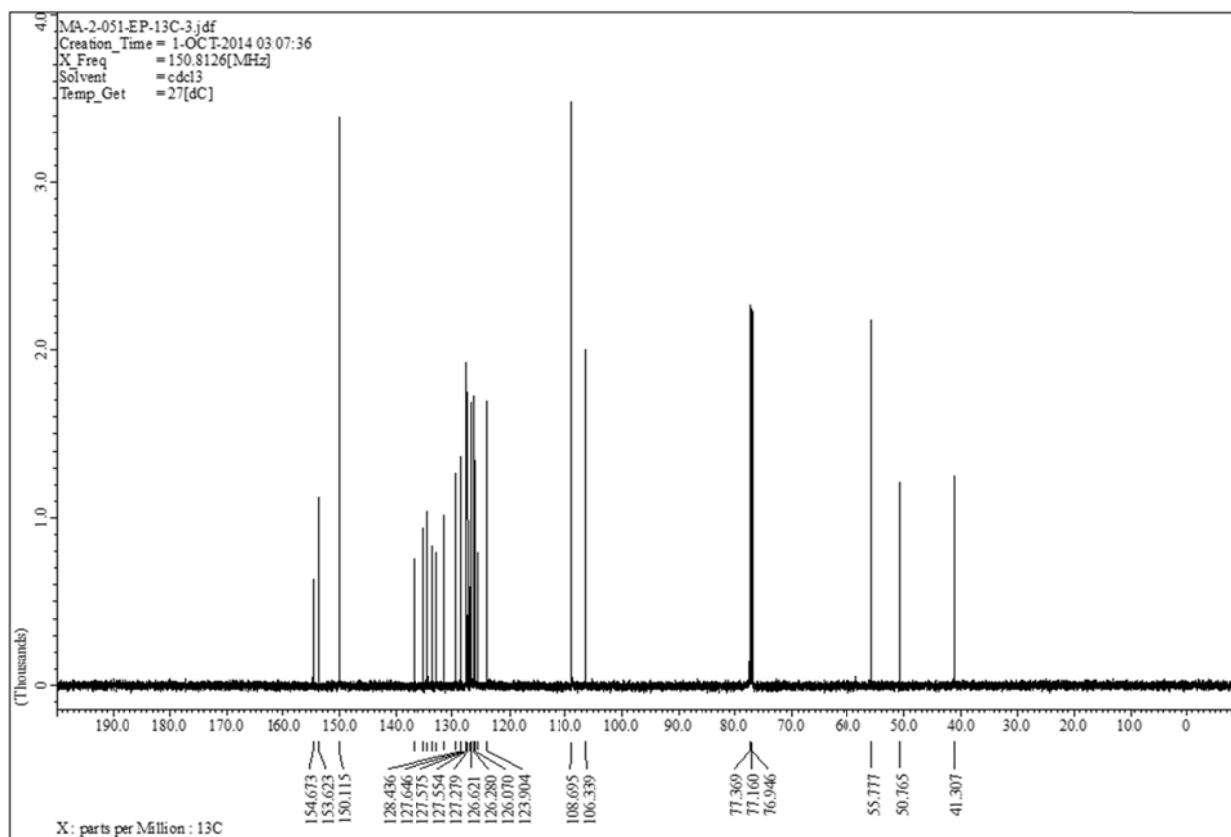

Supplementary Figure 21.  $^1\text{H}$  and  $^{13}\text{C}$ -NMR spectra for catalyst **1n**

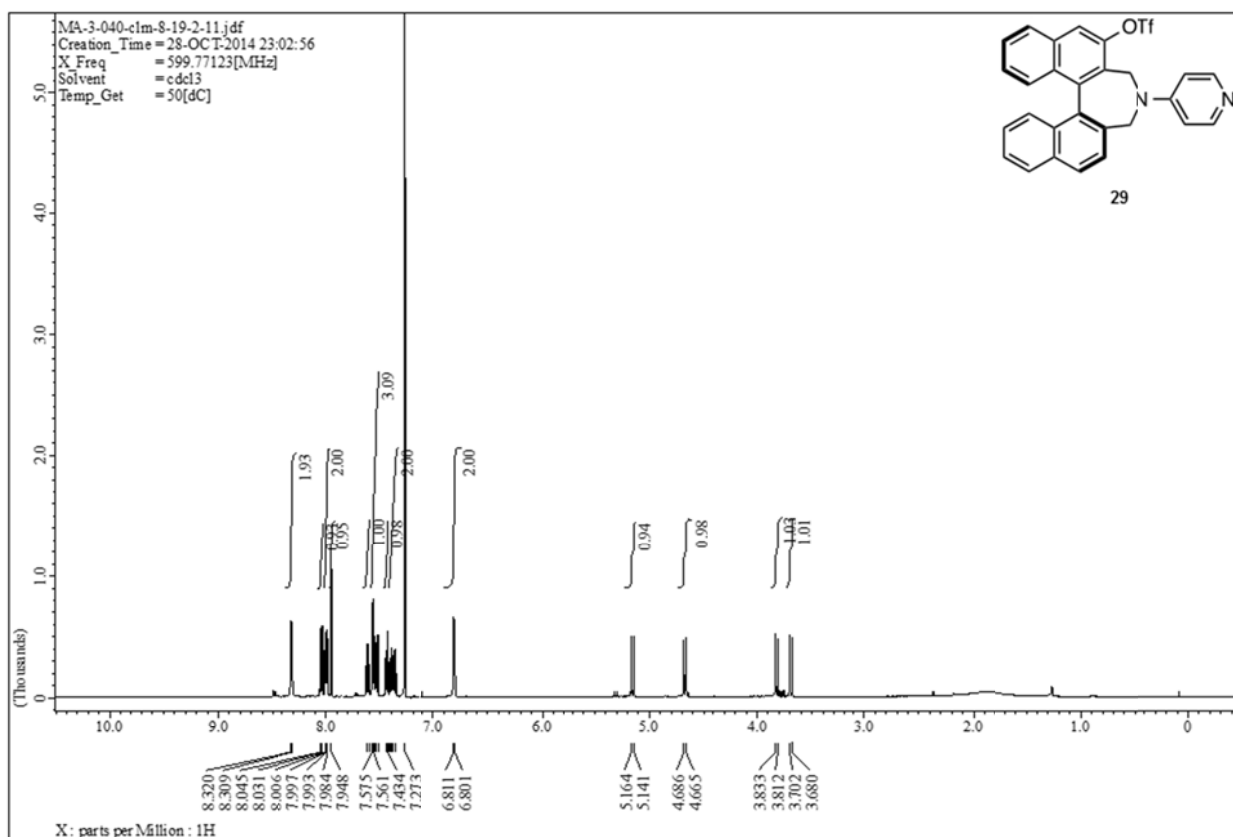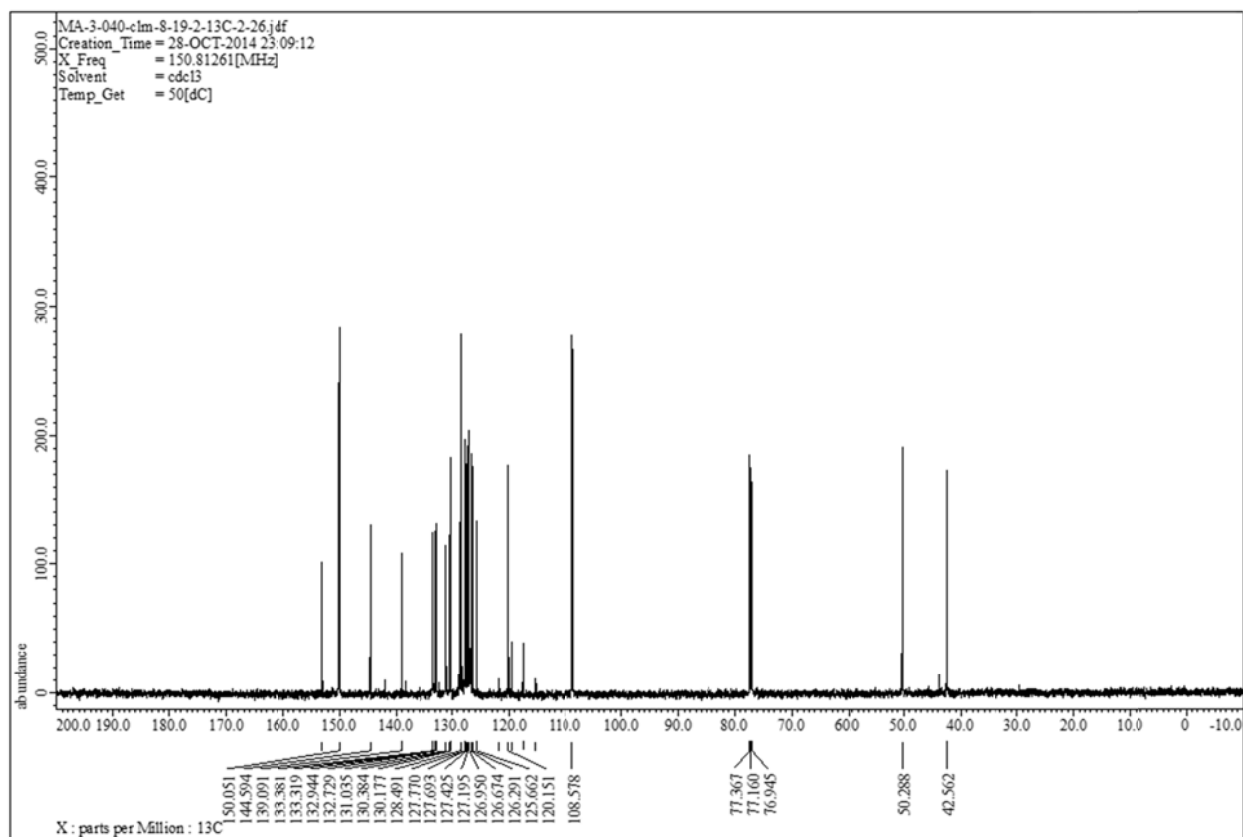

Supplementary Figure 22.  $^1\text{H}$  and  $^{13}\text{C}$ -NMR spectra for 29

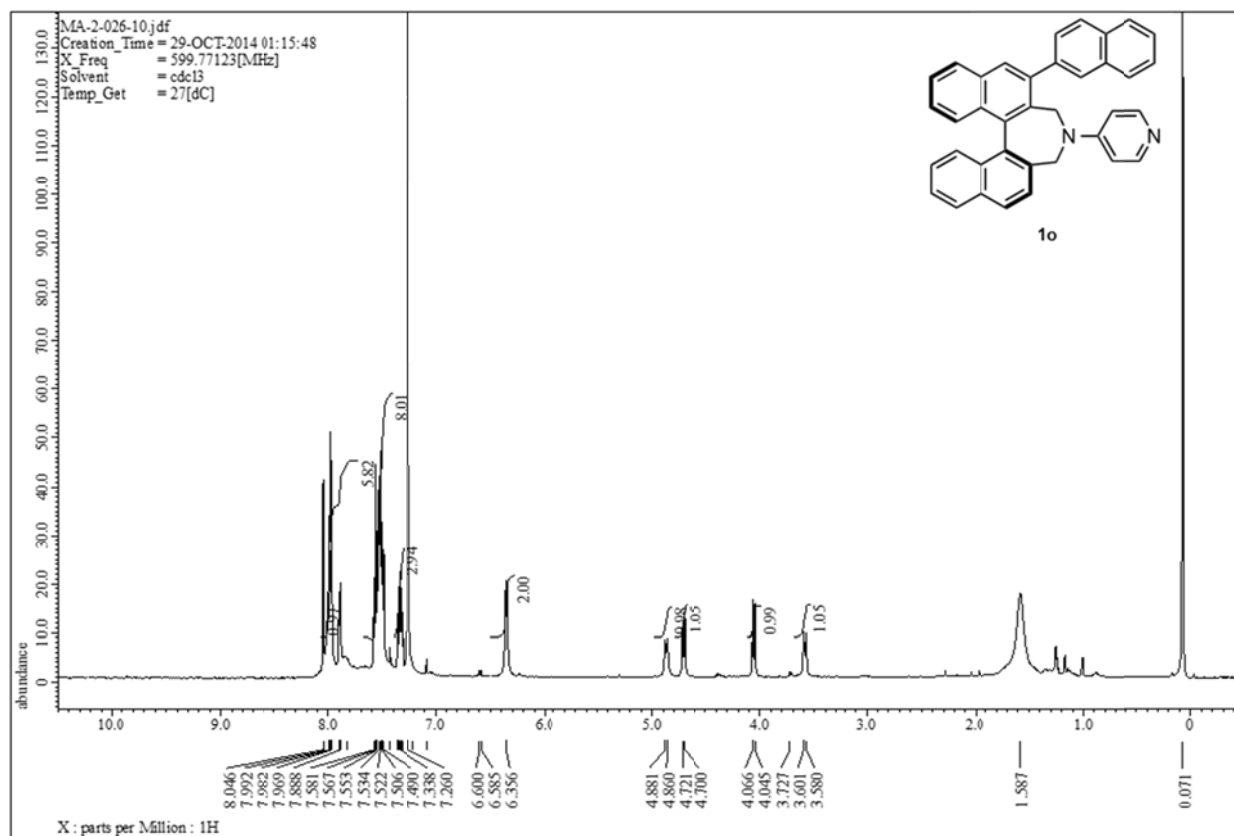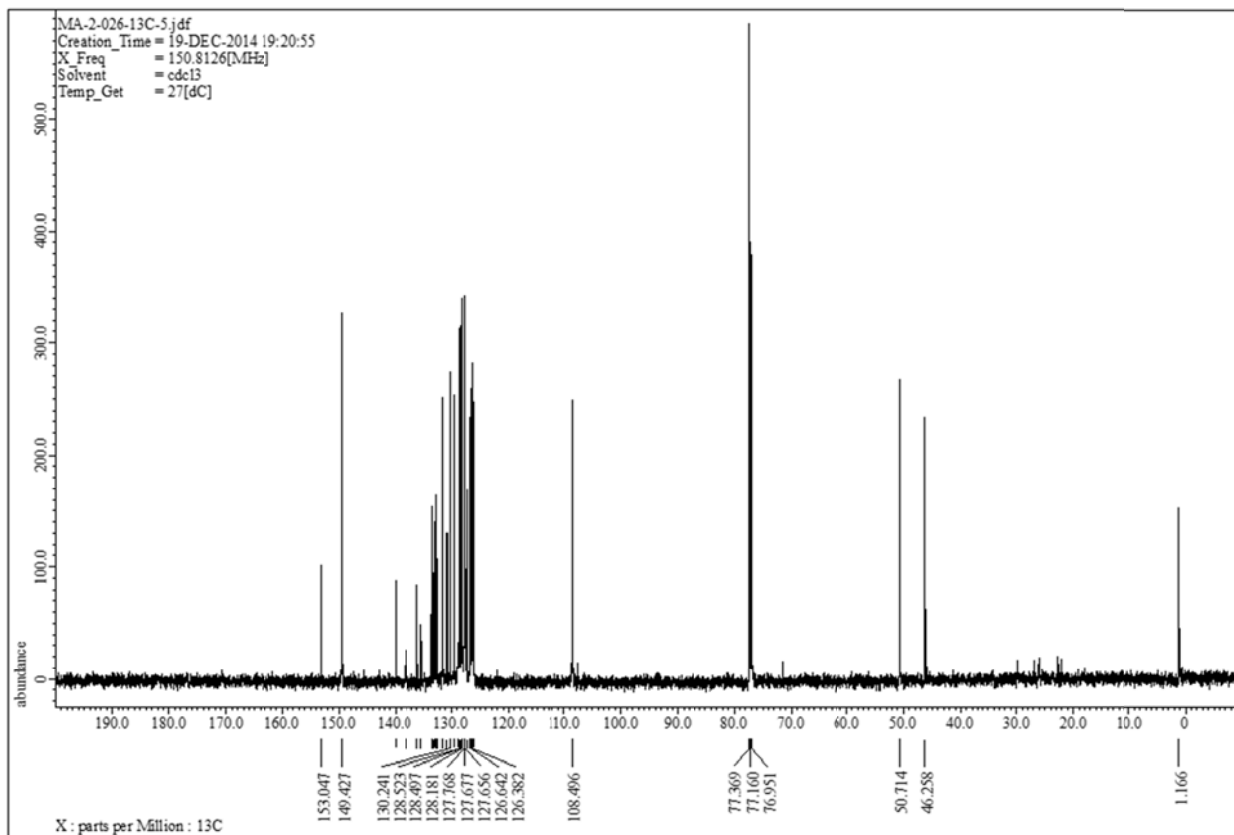

Supplementary Figure 23.  $^1\text{H}$  and  $^{13}\text{C}$ -NMR spectra for catalyst **1o**

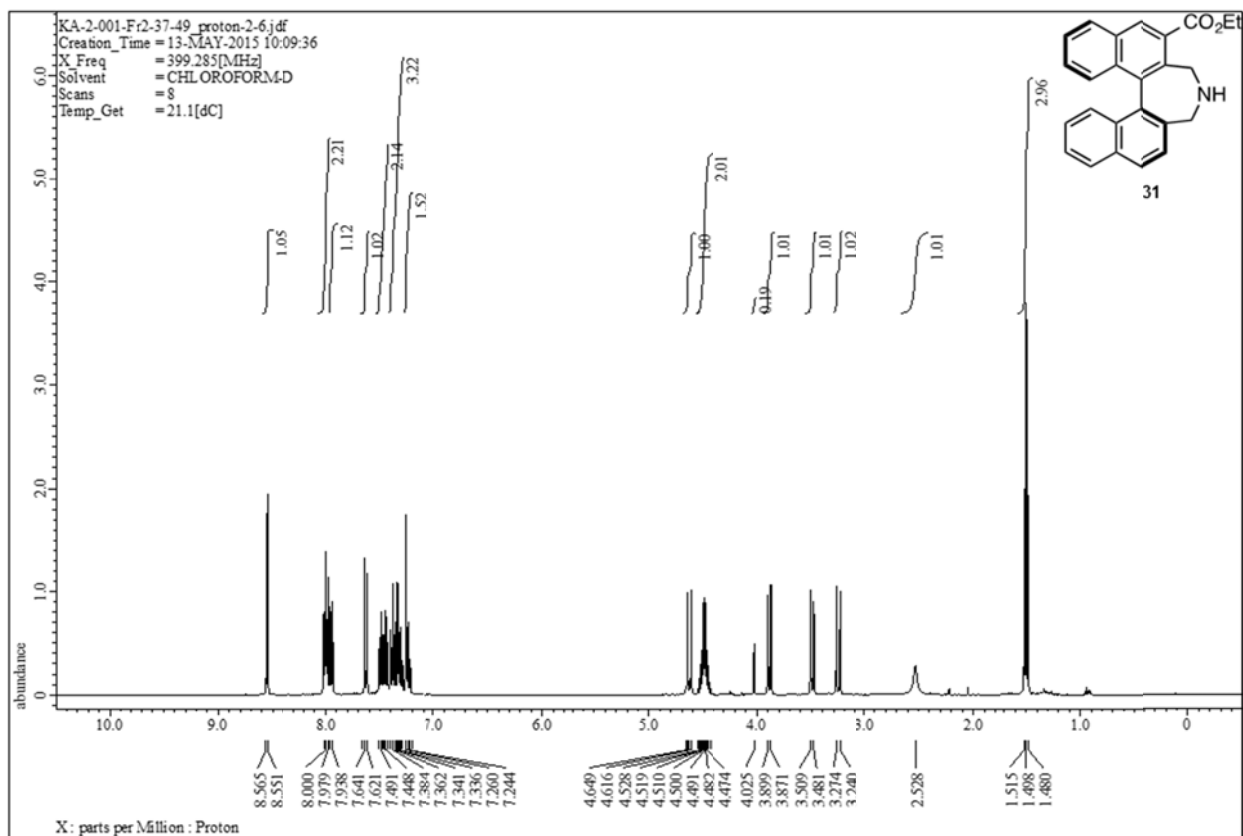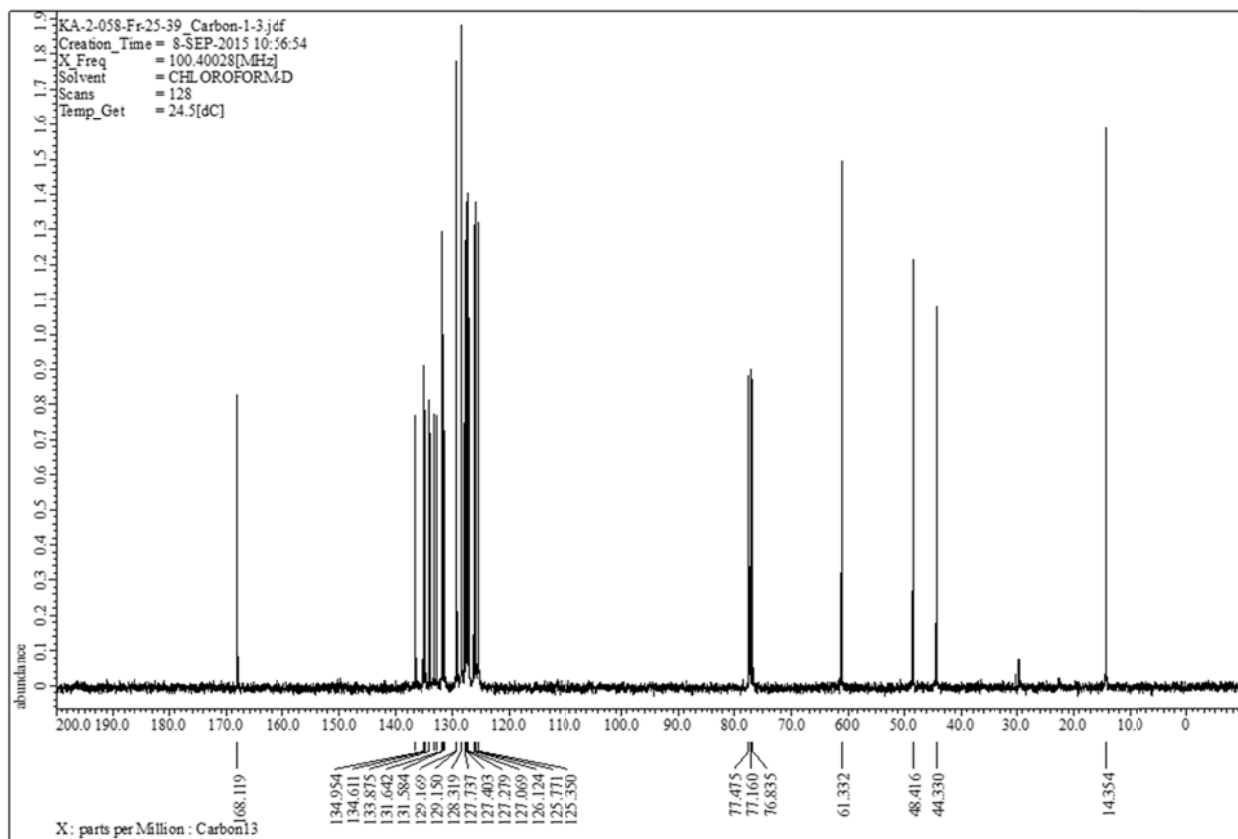

Supplementary Figure 24.  $^1\text{H}$  and  $^{13}\text{C}$ -NMR spectra for 31



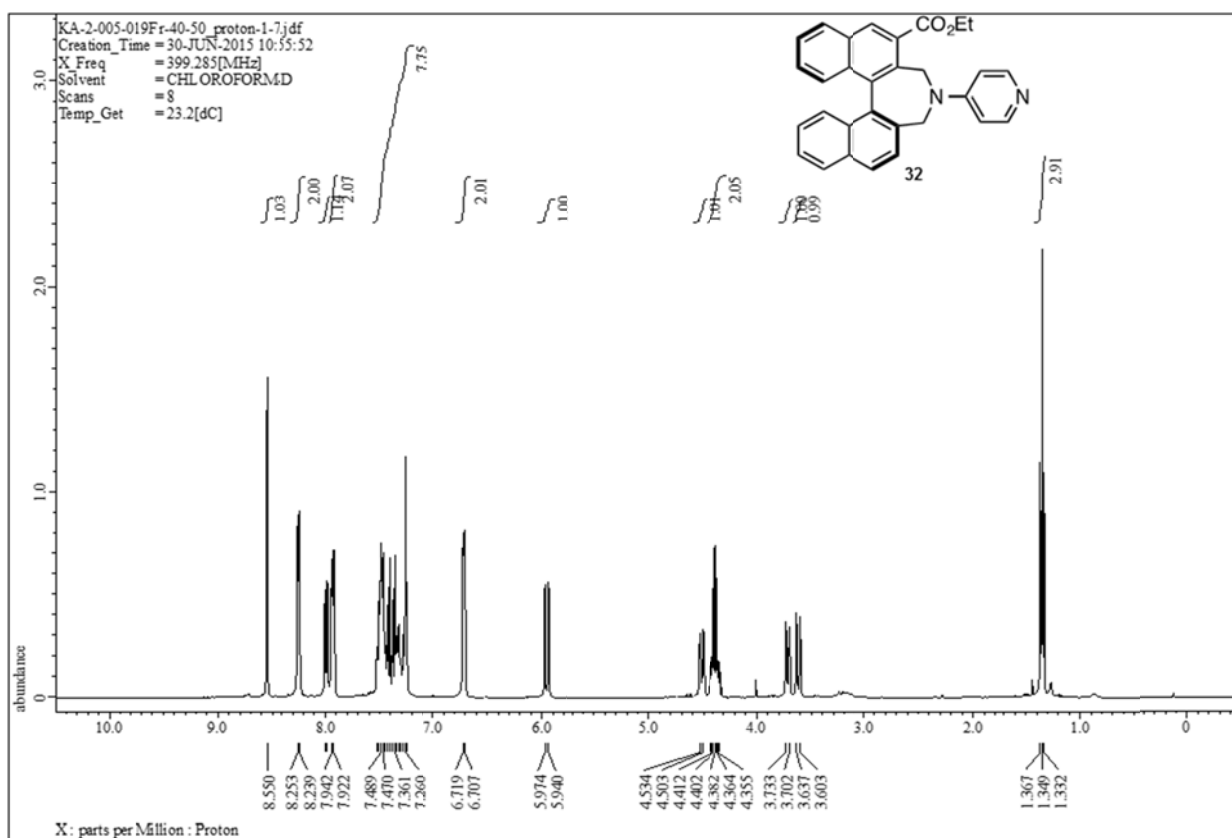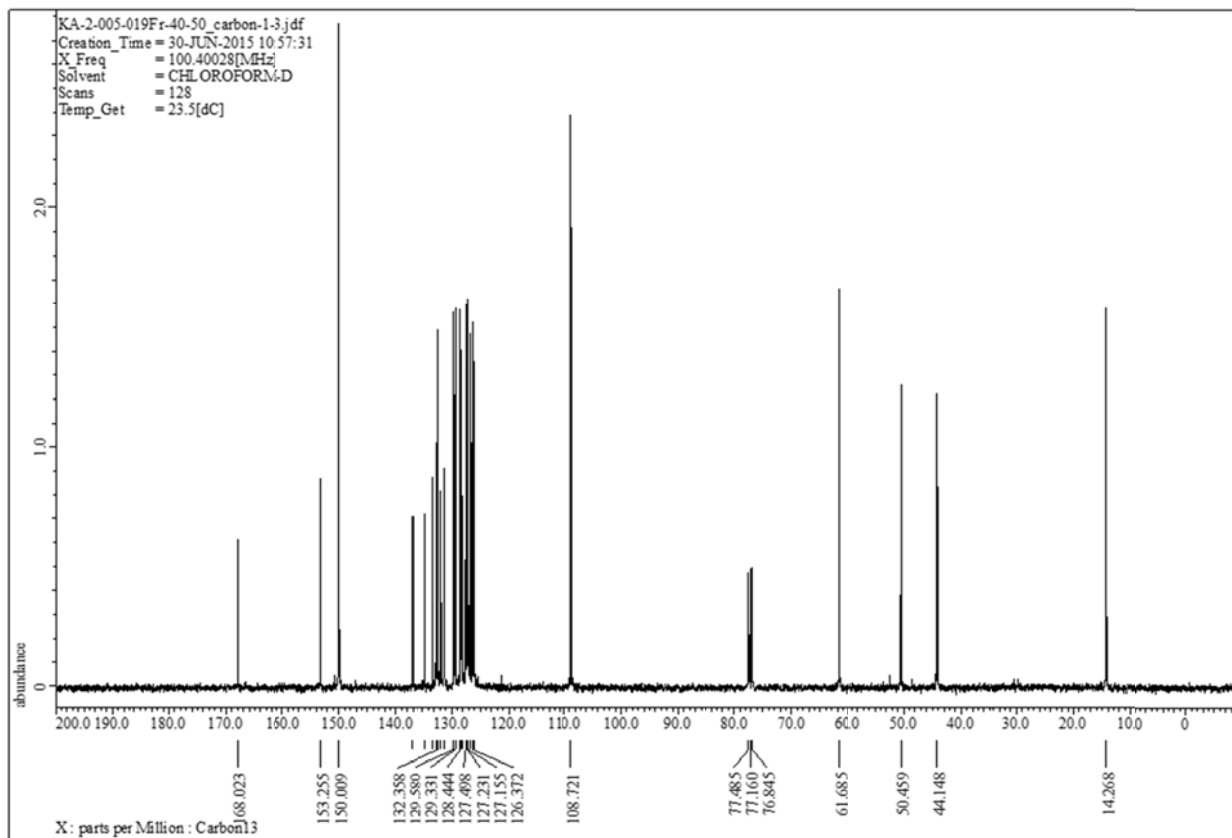

Supplementary Figure 25.  $^1\text{H}$  and  $^{13}\text{C}$ -NMR spectra for 32

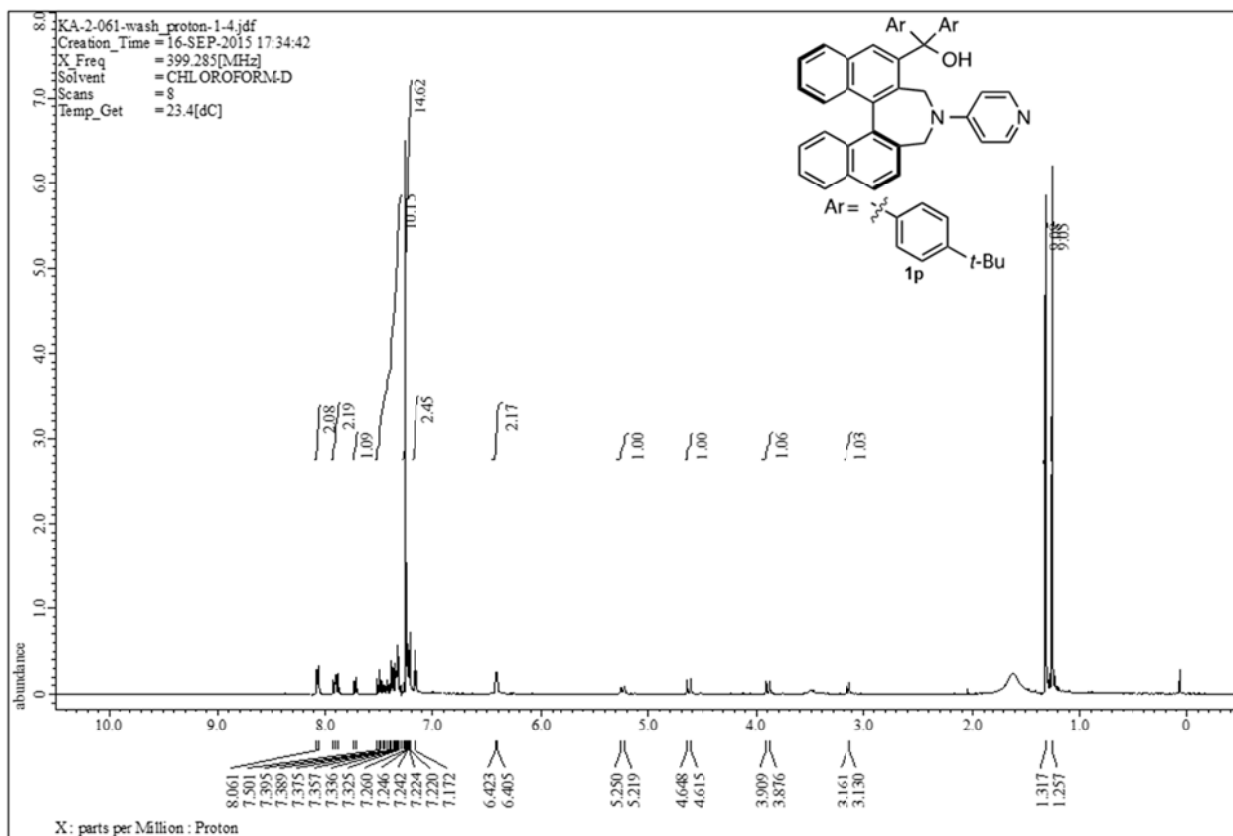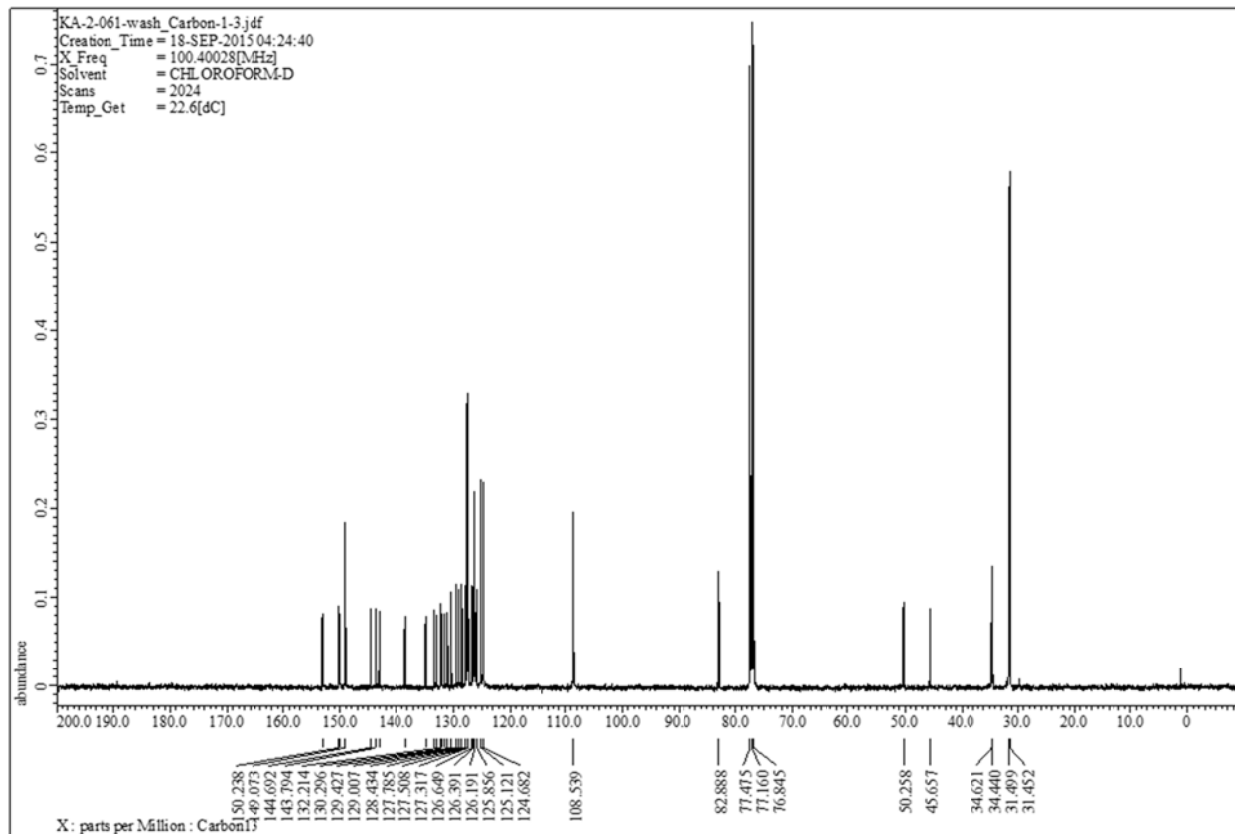

Supplementary Figure 26.  $^1\text{H}$  and  $^{13}\text{C}$ -NMR spectra for **1p**

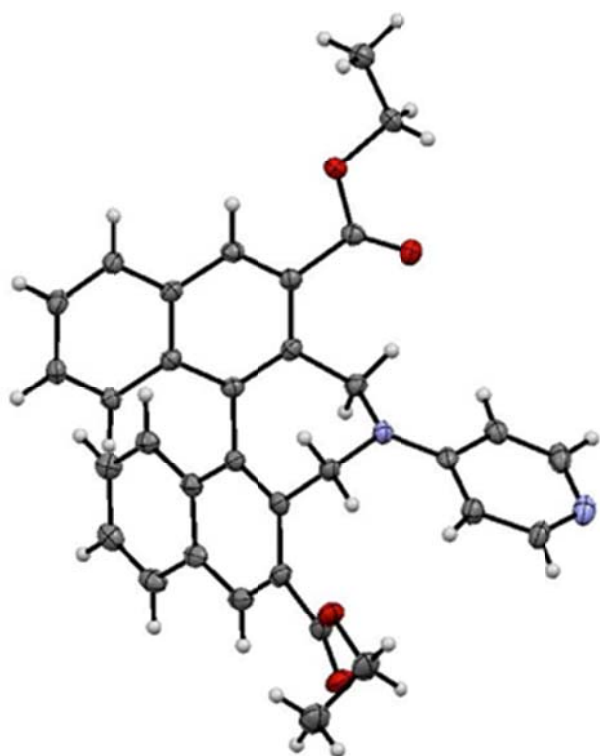

**Supplementary Figure 27.** X-ray structure of catalyst **1e**

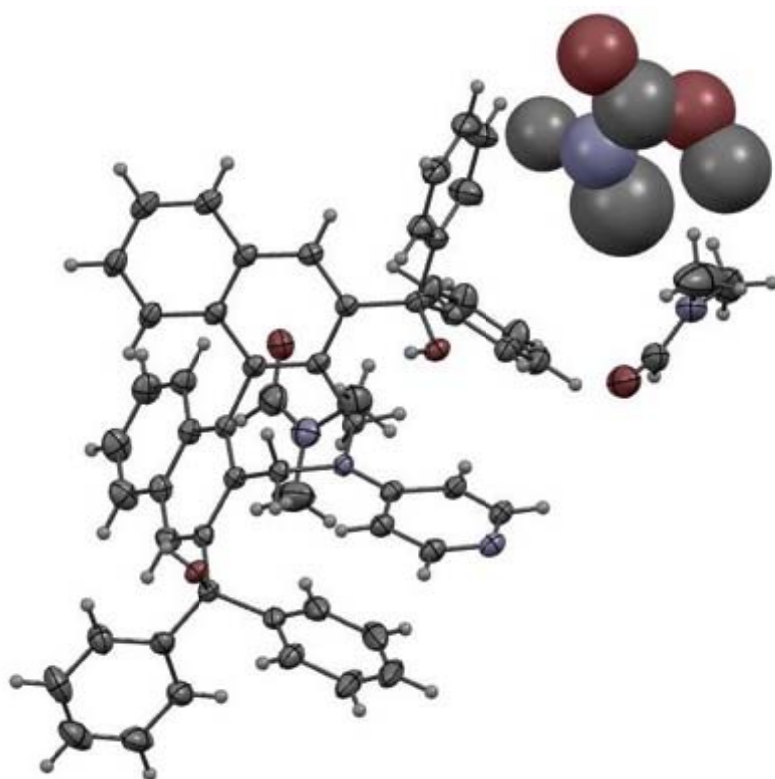

**Supplementary Figure 28.** X-ray structure of catalyst **1g**

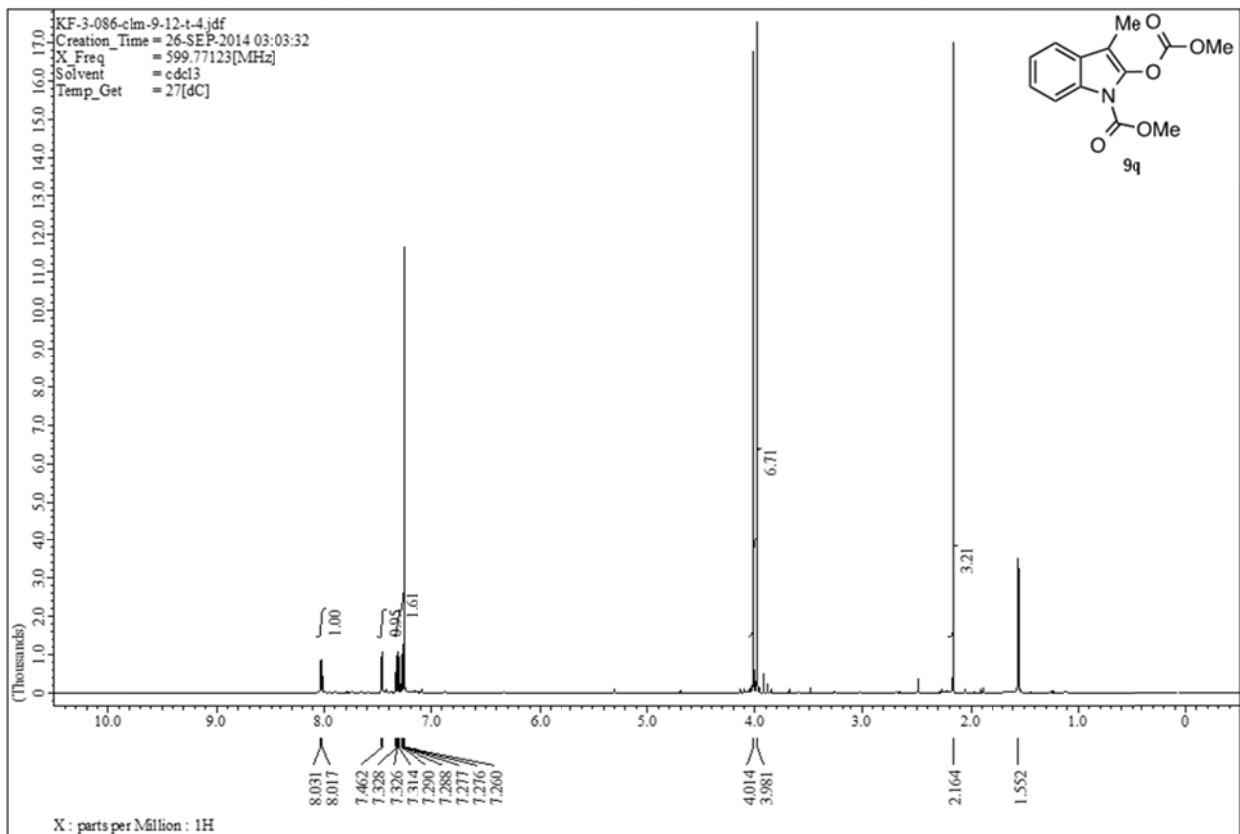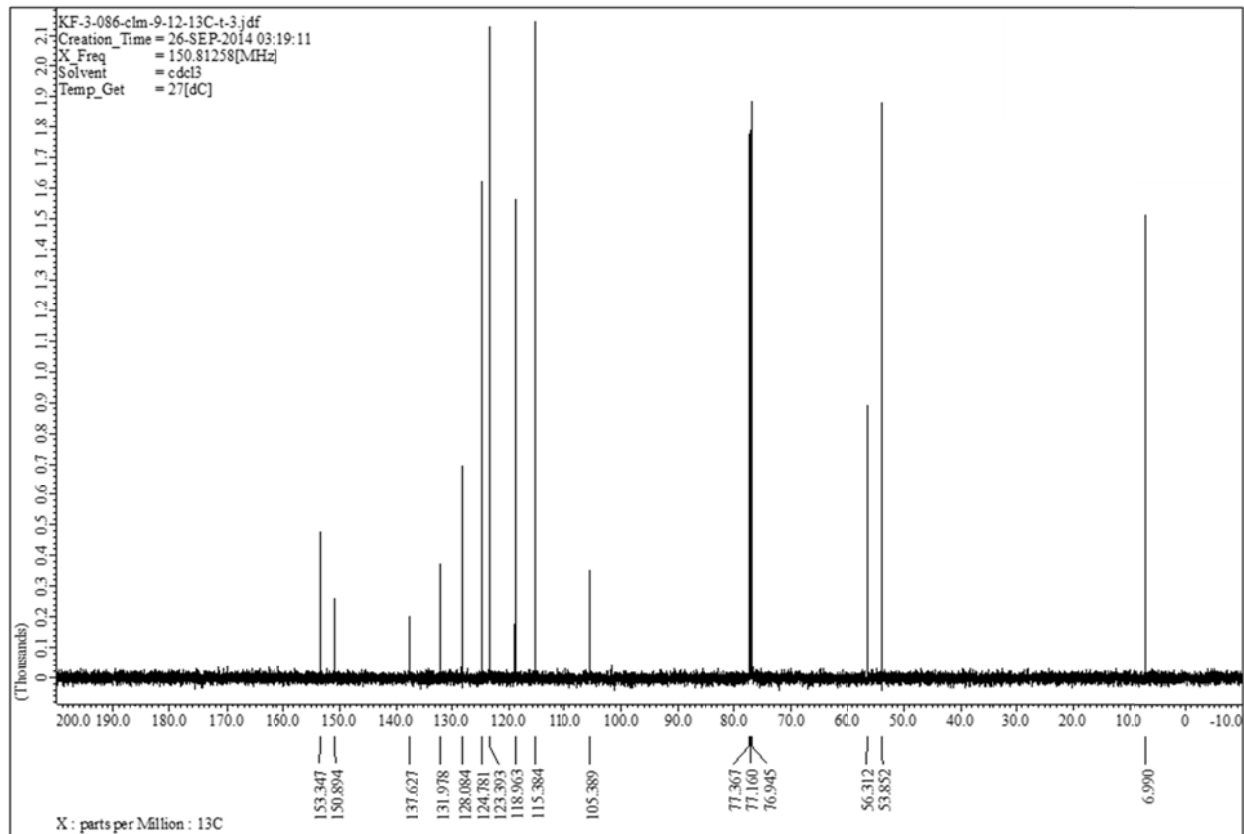

Supplementary Figure 29.  $^1\text{H}$  and  $^{13}\text{C}$ -NMR spectra for substrate **9q**

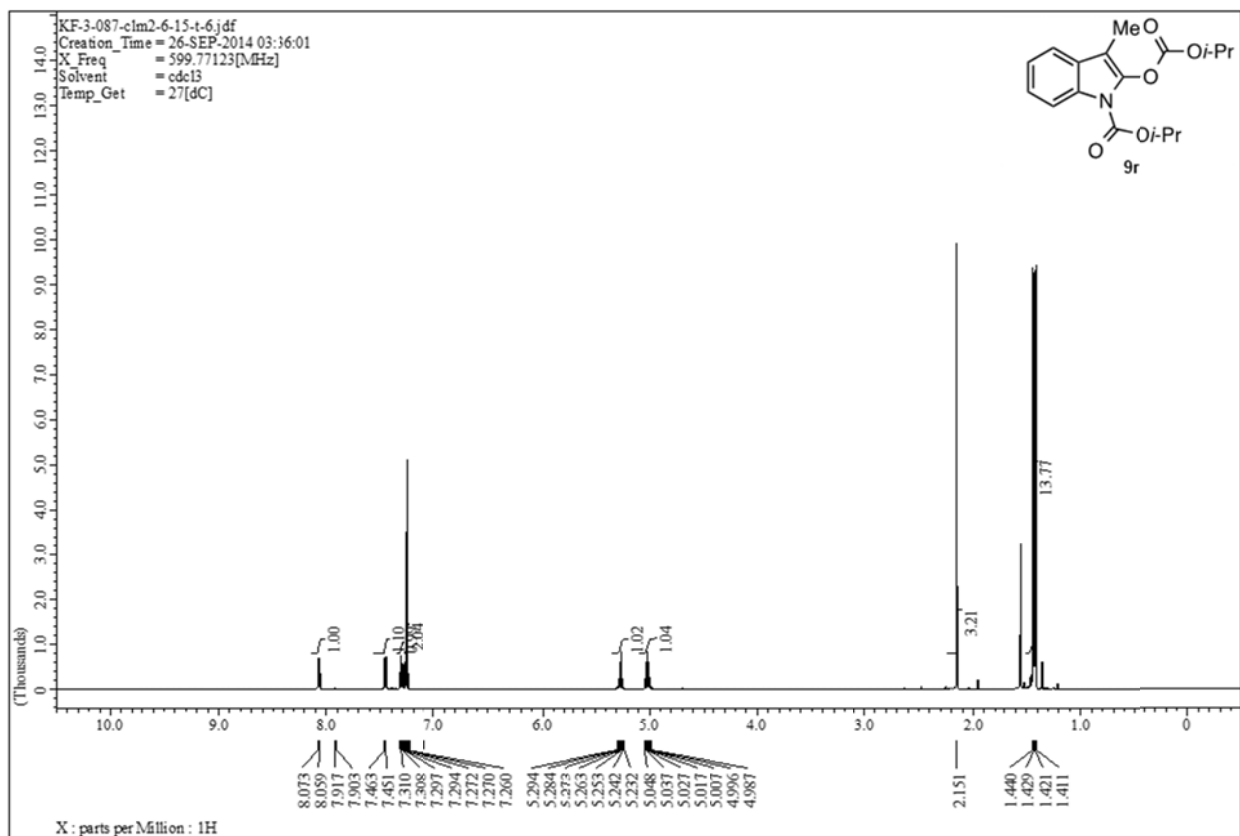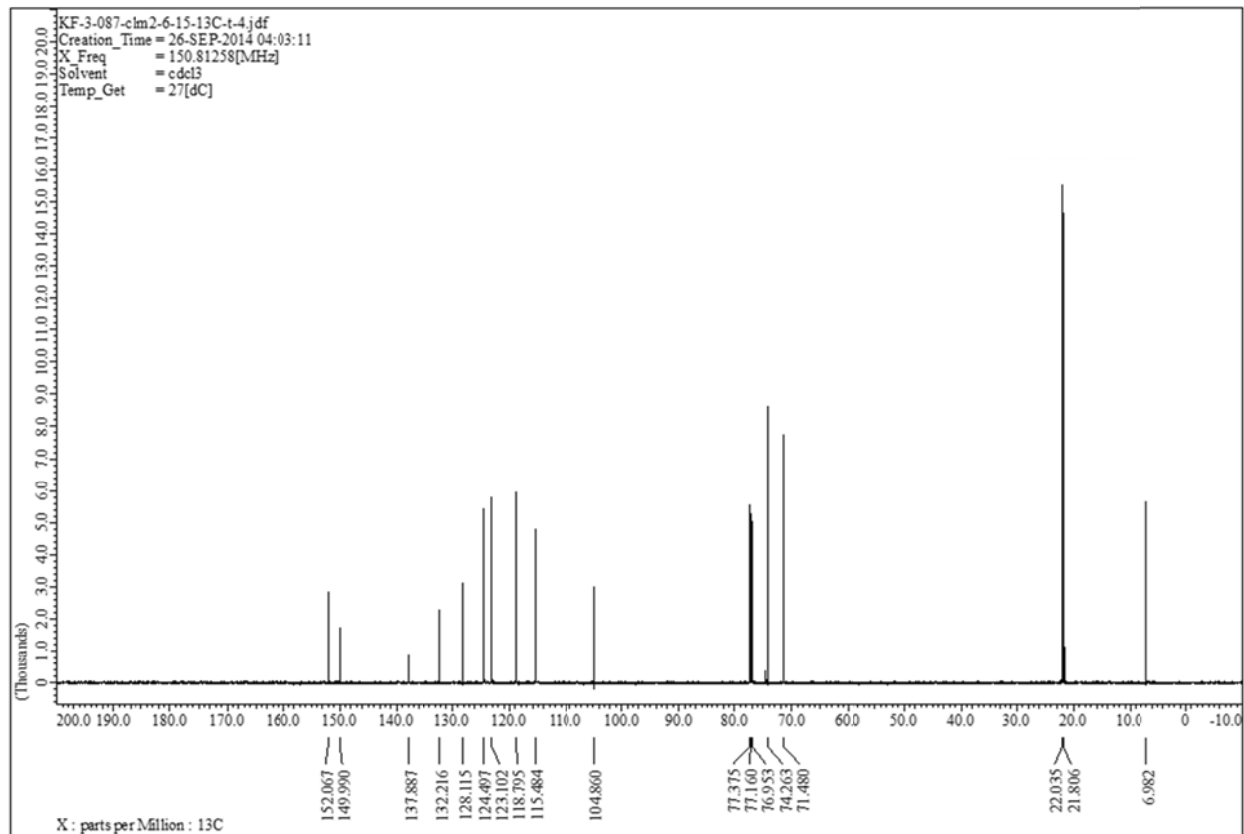

Supplementary Figure 30.  $^1\text{H}$  and  $^{13}\text{C}$ -NMR spectra for substrate **9r**

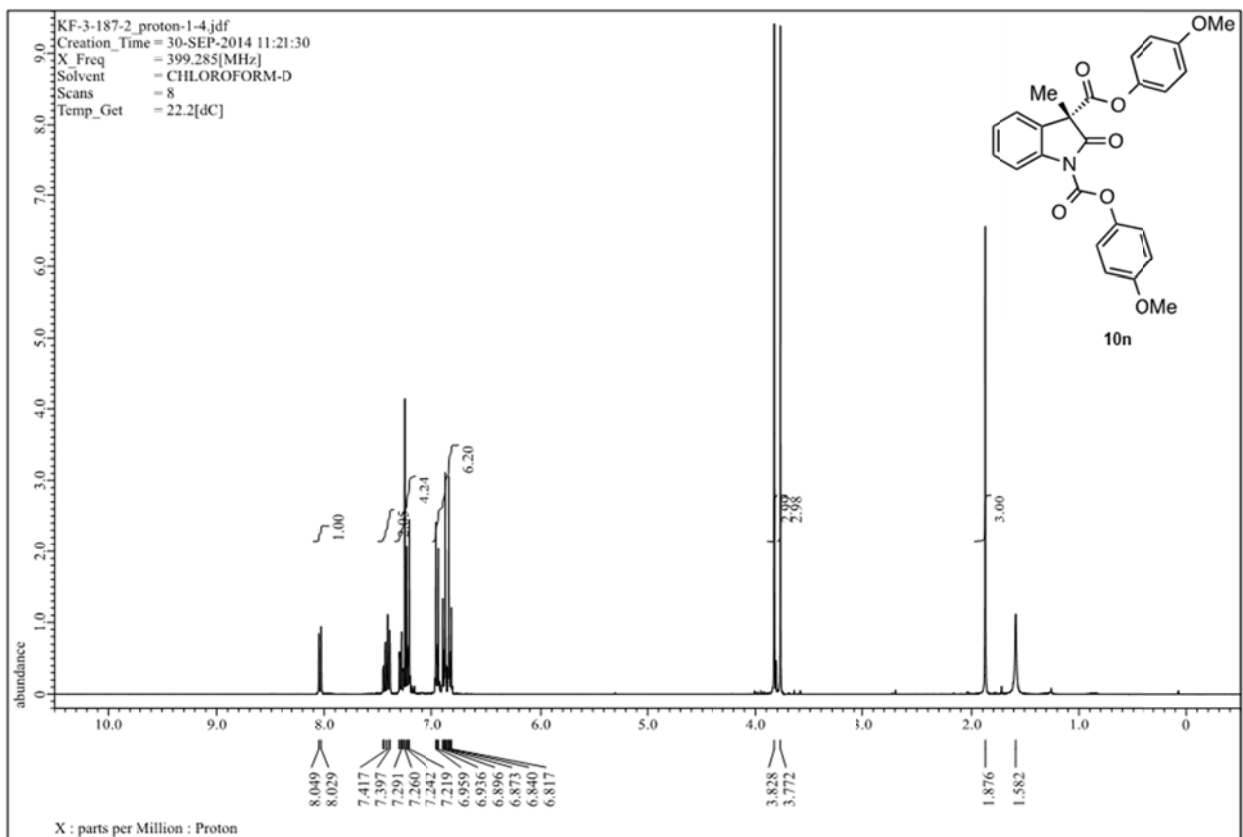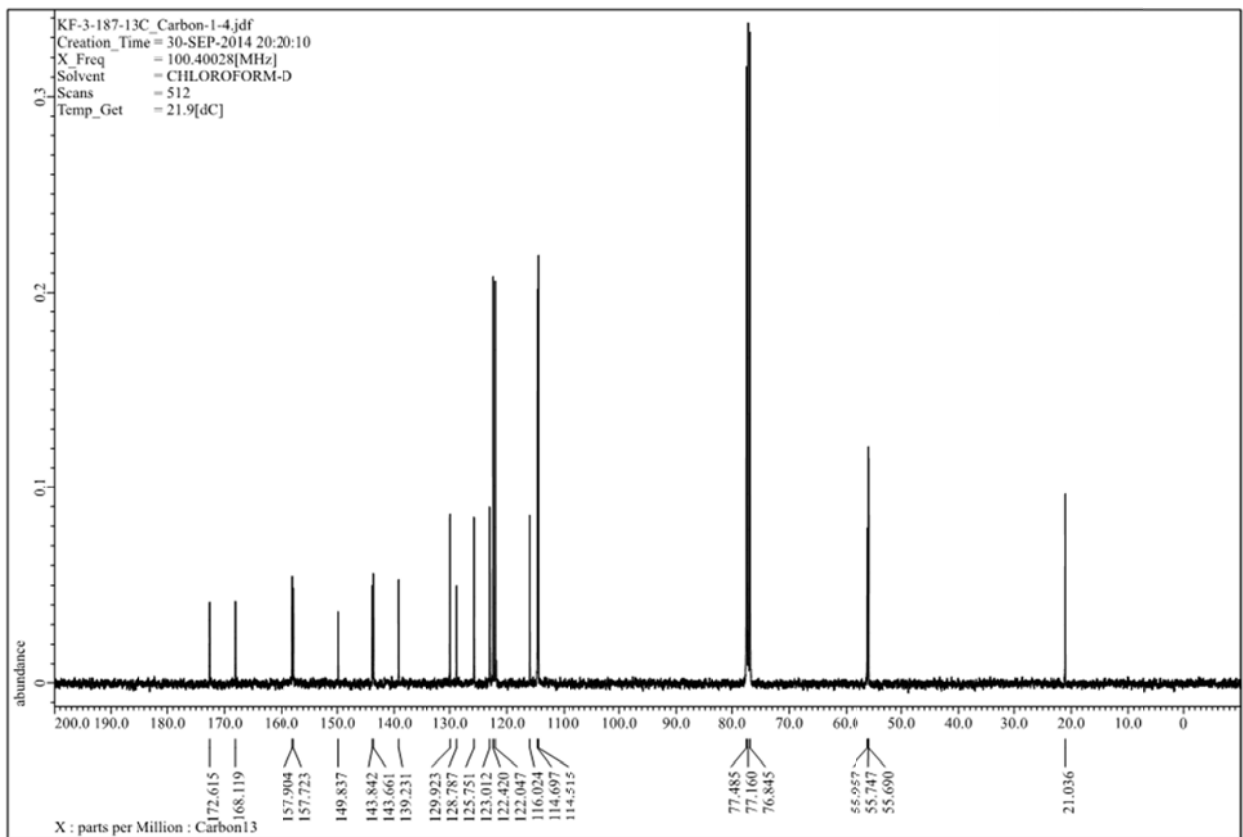

Supplementary Figure 31.  $^1\text{H}$  and  $^{13}\text{C}$ -NMR spectra for product 10n

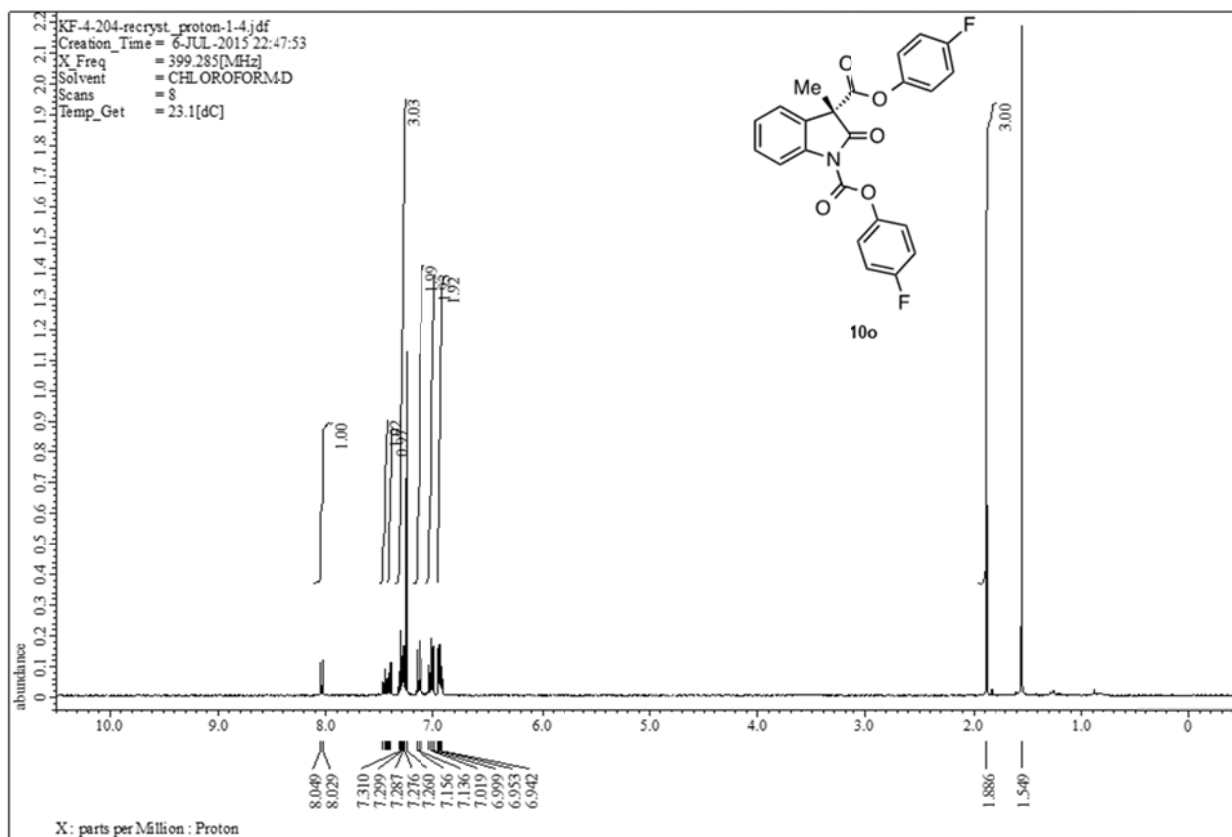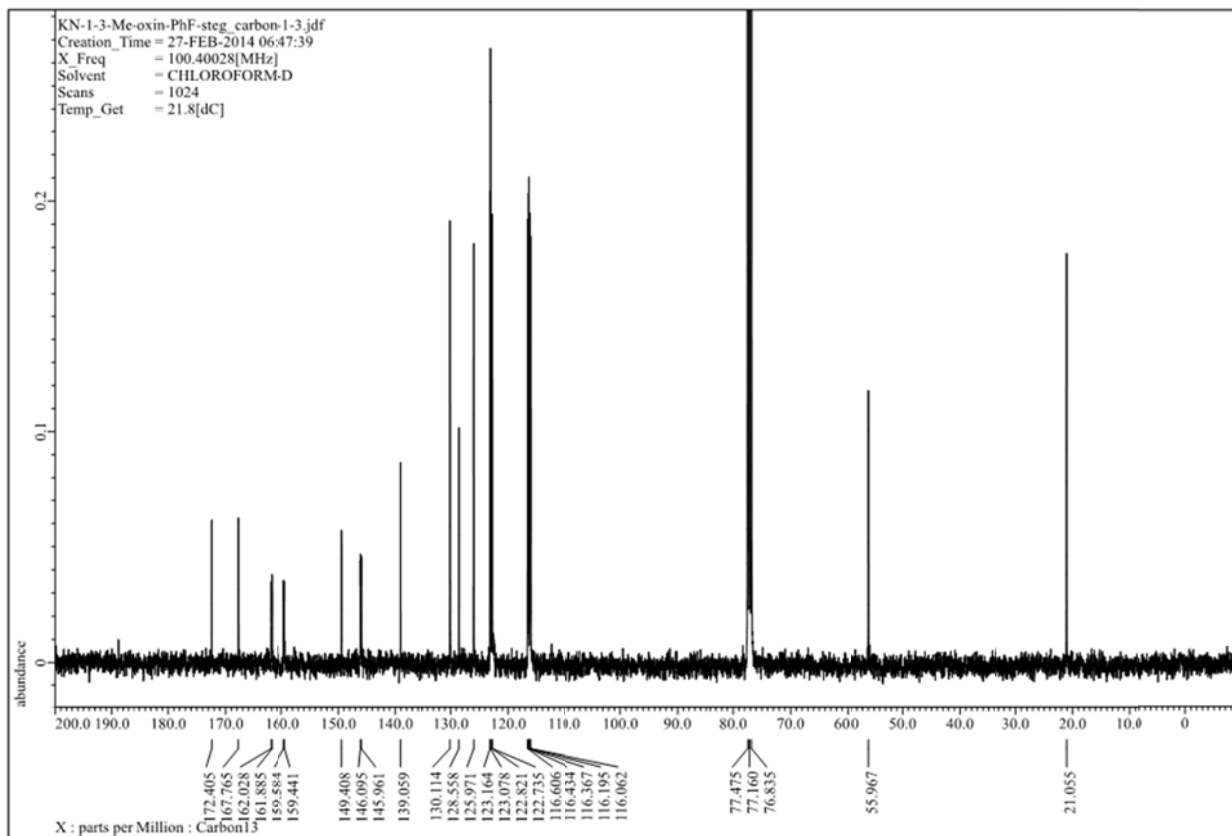

Supplementary Figure 32.  $^1\text{H}$  and  $^{13}\text{C}$ -NMR spectra for product **10o**

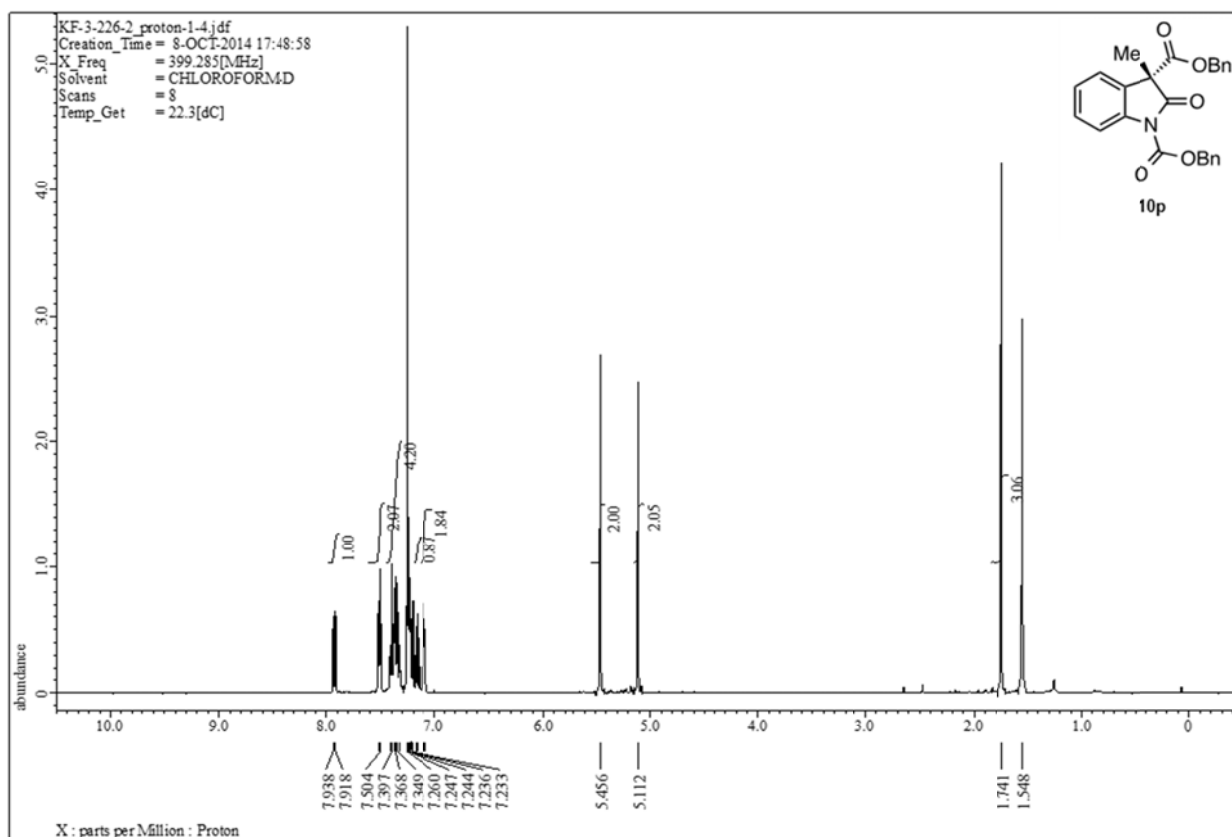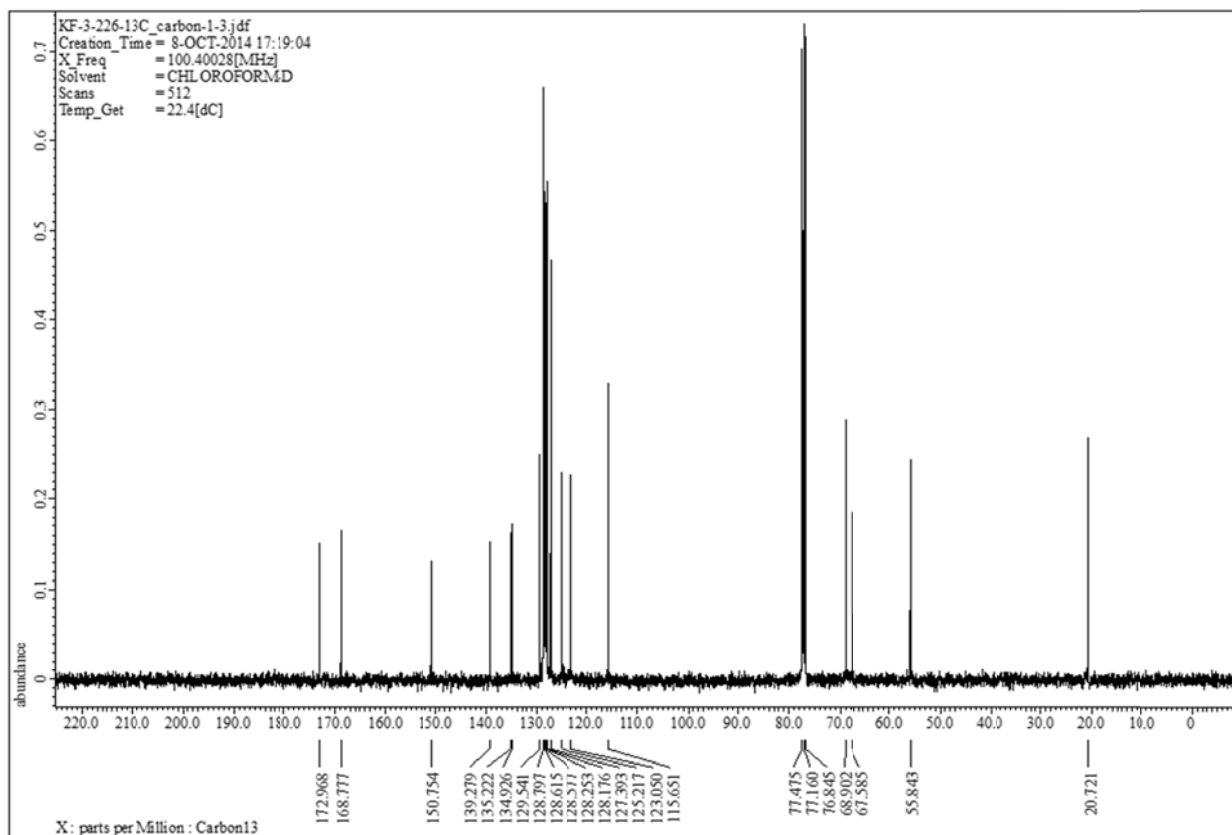

Supplementary Figure 33.  $^1\text{H}$  and  $^{13}\text{C}$ -NMR spectra for product 10p



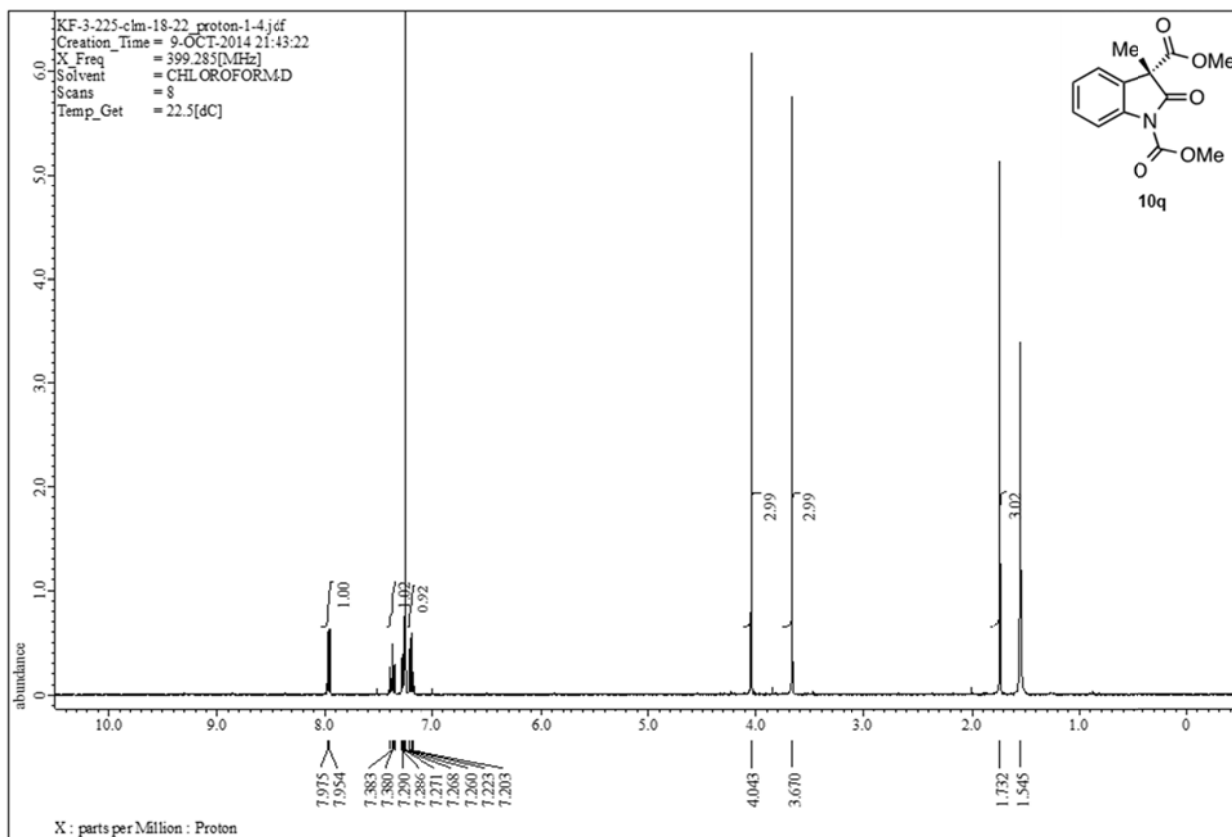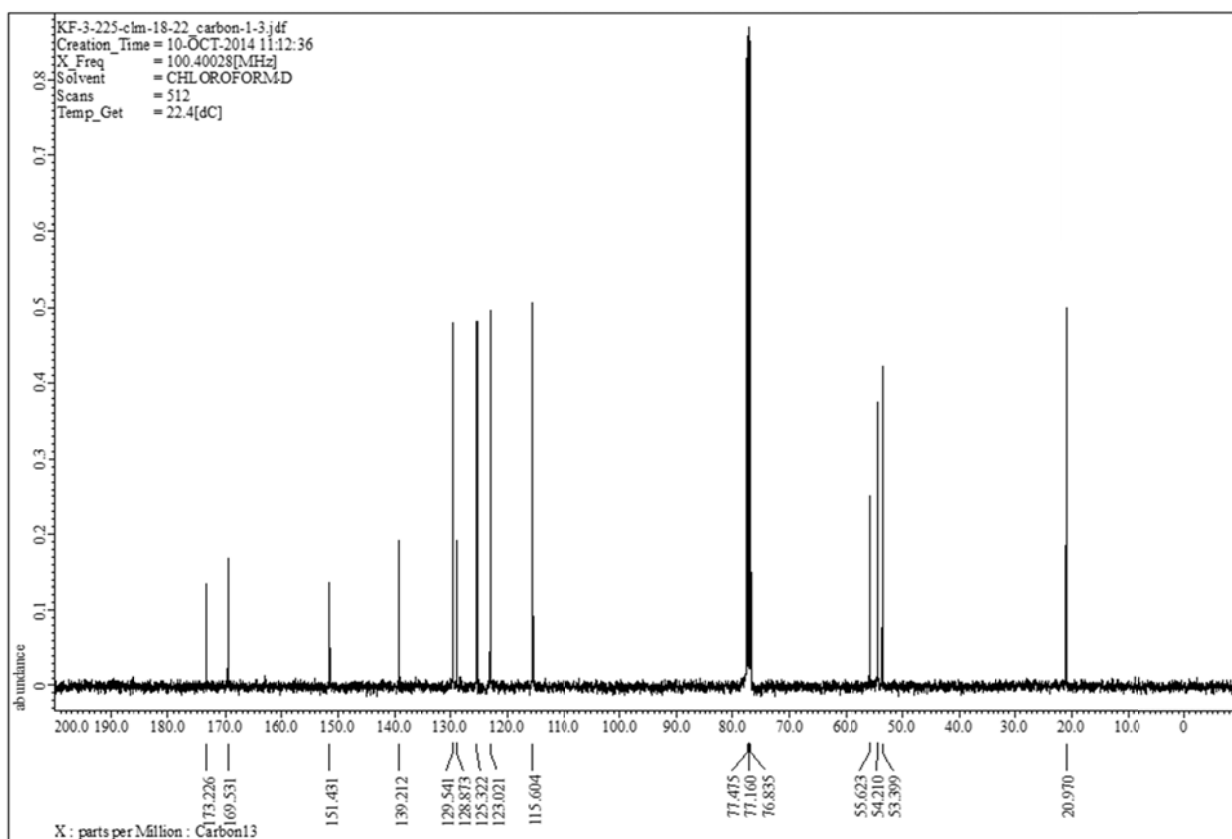

Supplementary Figure 34.  $^1\text{H}$  and  $^{13}\text{C}$ -NMR spectra for product **10q**

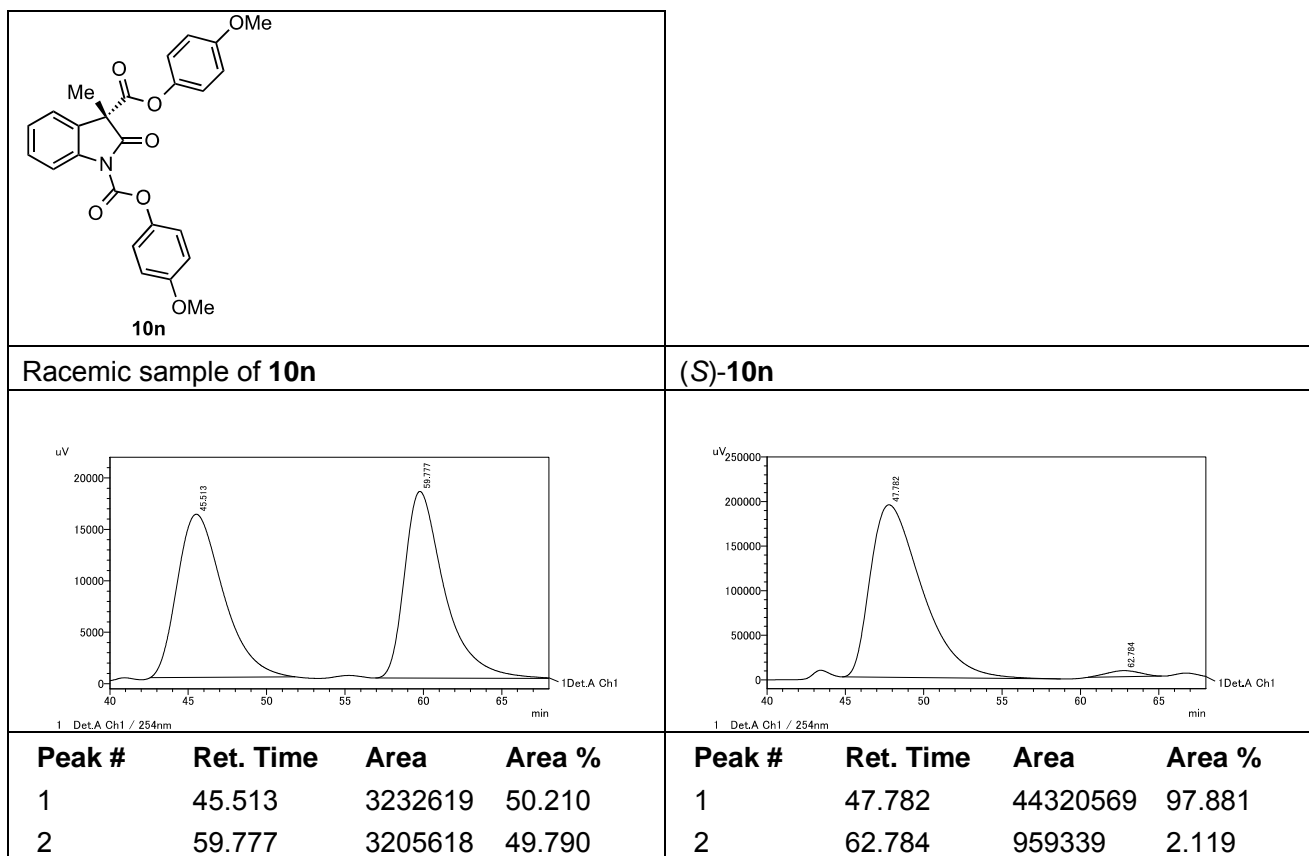

**Supplementary Figure 35.** HPLC spectra for product **10n** of Steglich rearrangement with catalyst **1j** (see Supplementary Table 3)

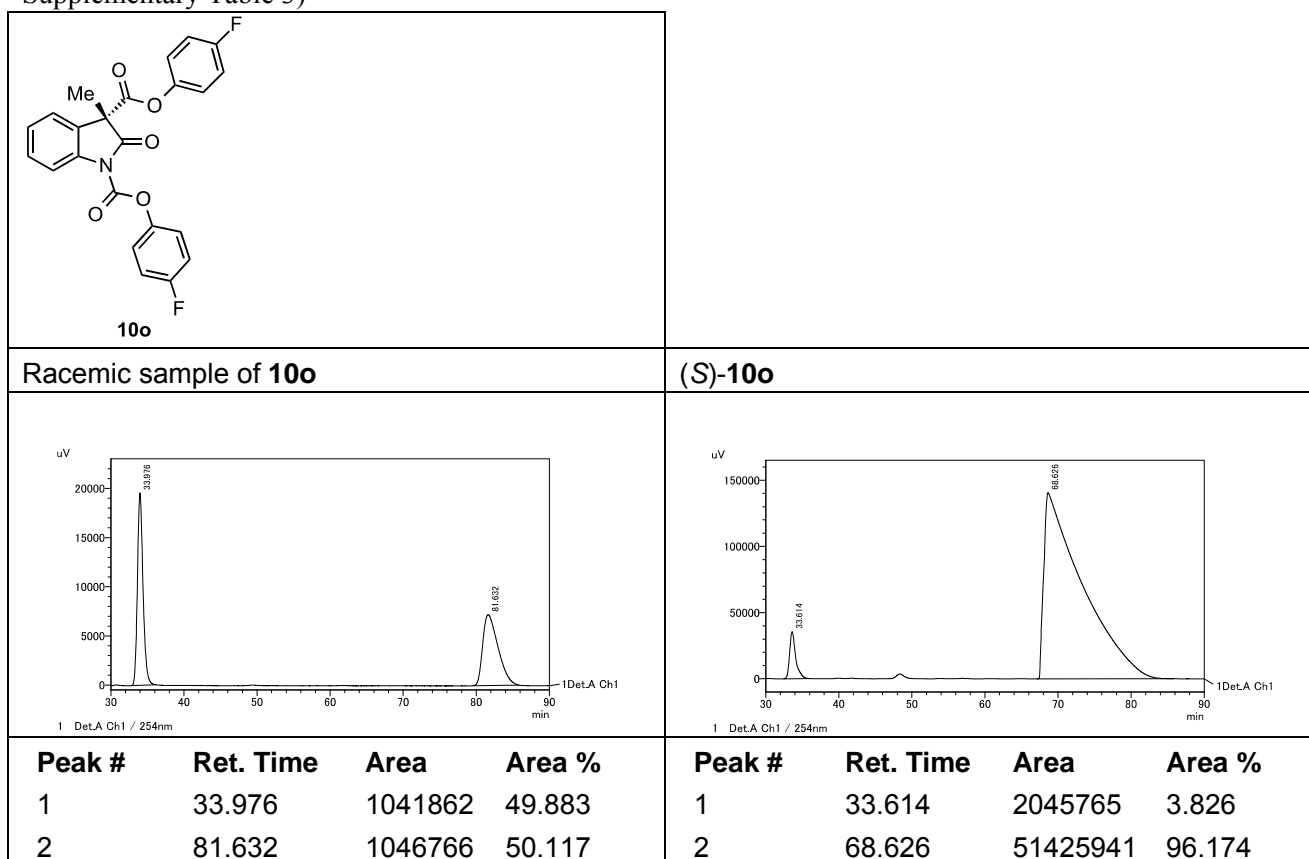

**Supplementary Figure 36.** HPLC spectra for product **10o** of Steglich rearrangement with catalyst **1j** (see Supplementary Table 3)

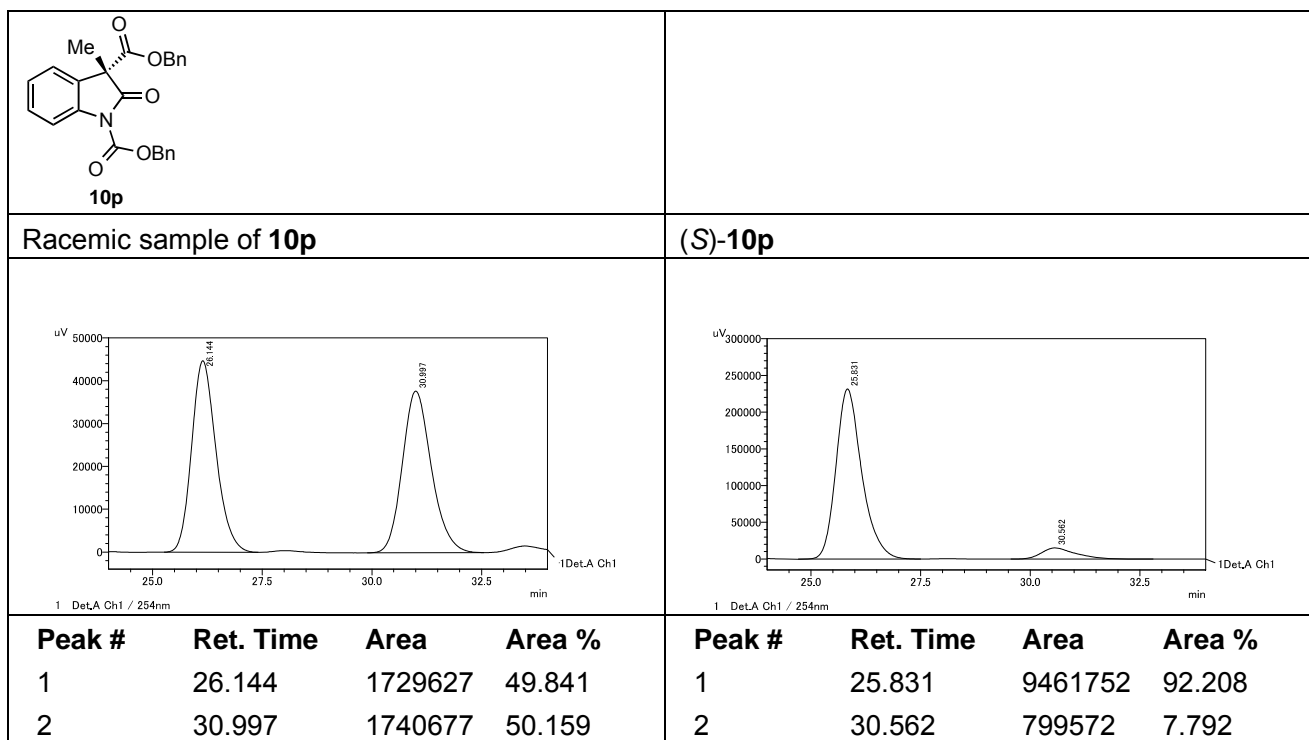

**Supplementary Figure 37.** HPLC spectra for product **10p** of Steglich rearrangement with catalyst **1j** (see Supplementary Table 3)

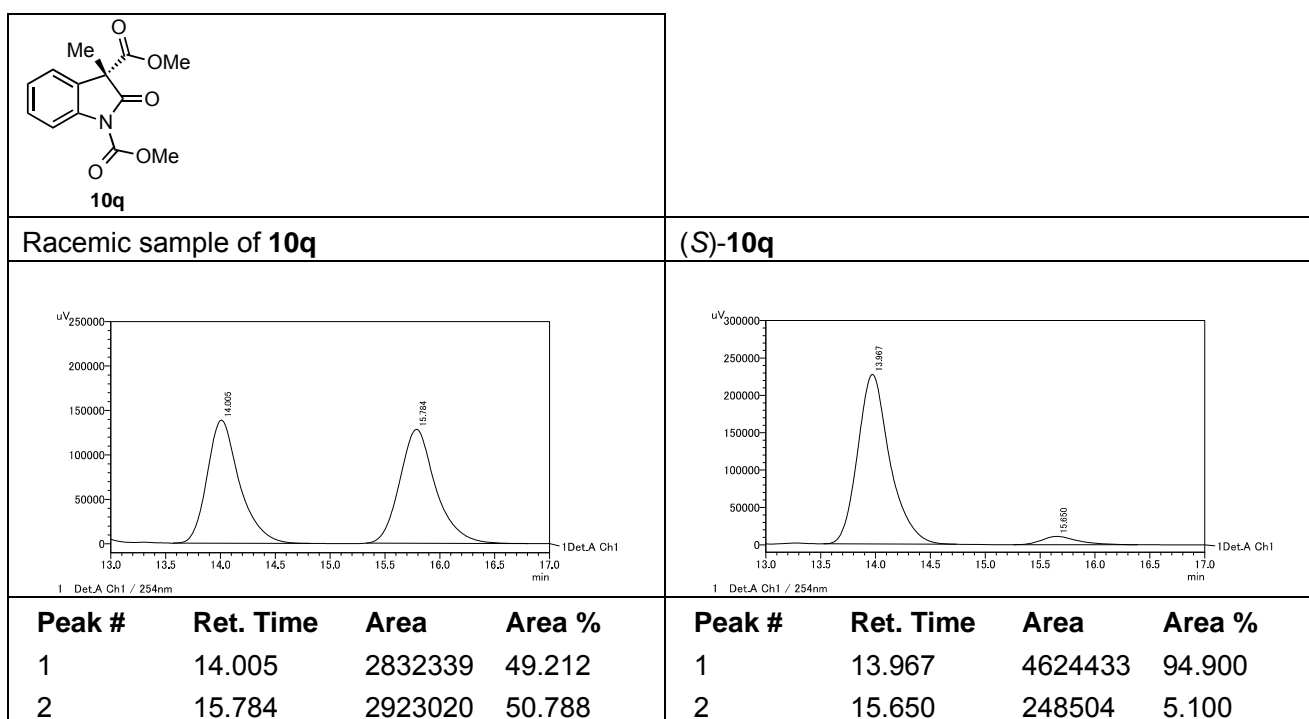

**Supplementary Figure 38.** HPLC spectra for product **10q** of Steglich rearrangement with catalyst **1j** (see Supplementary Table 3)

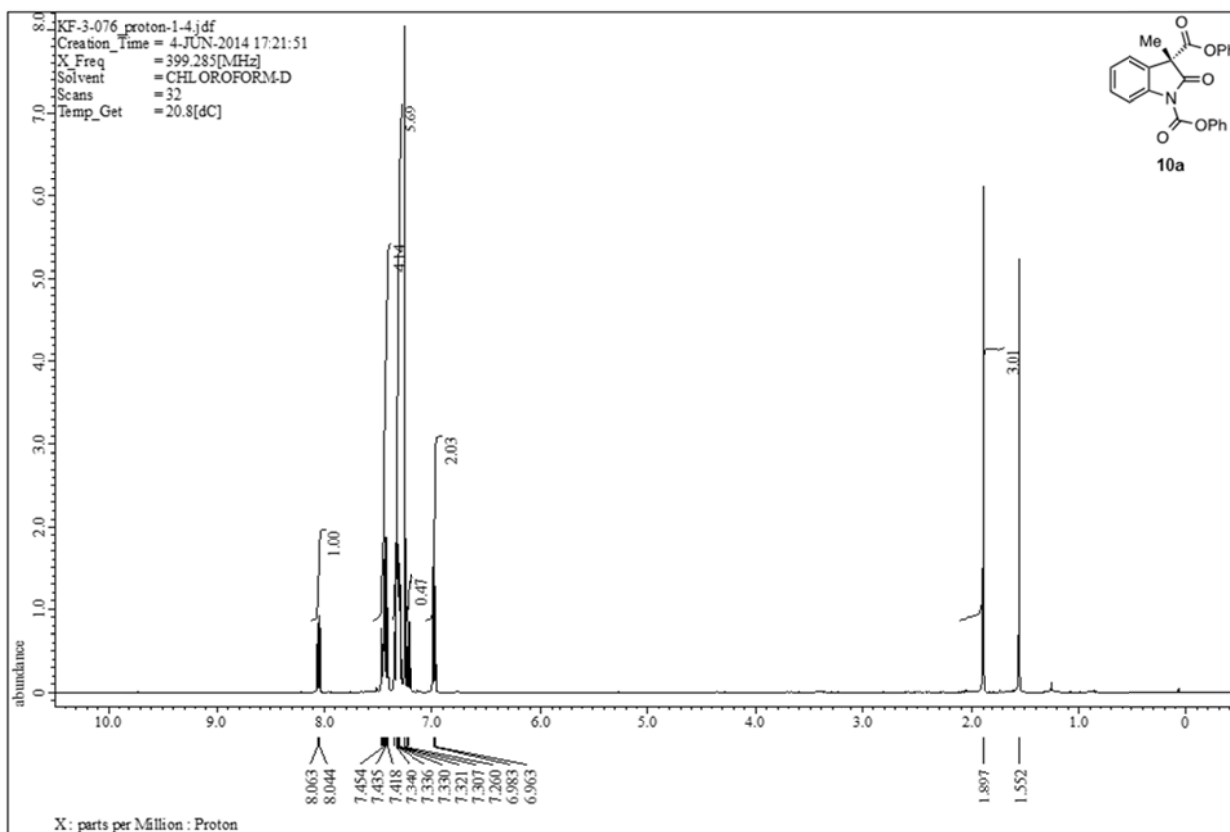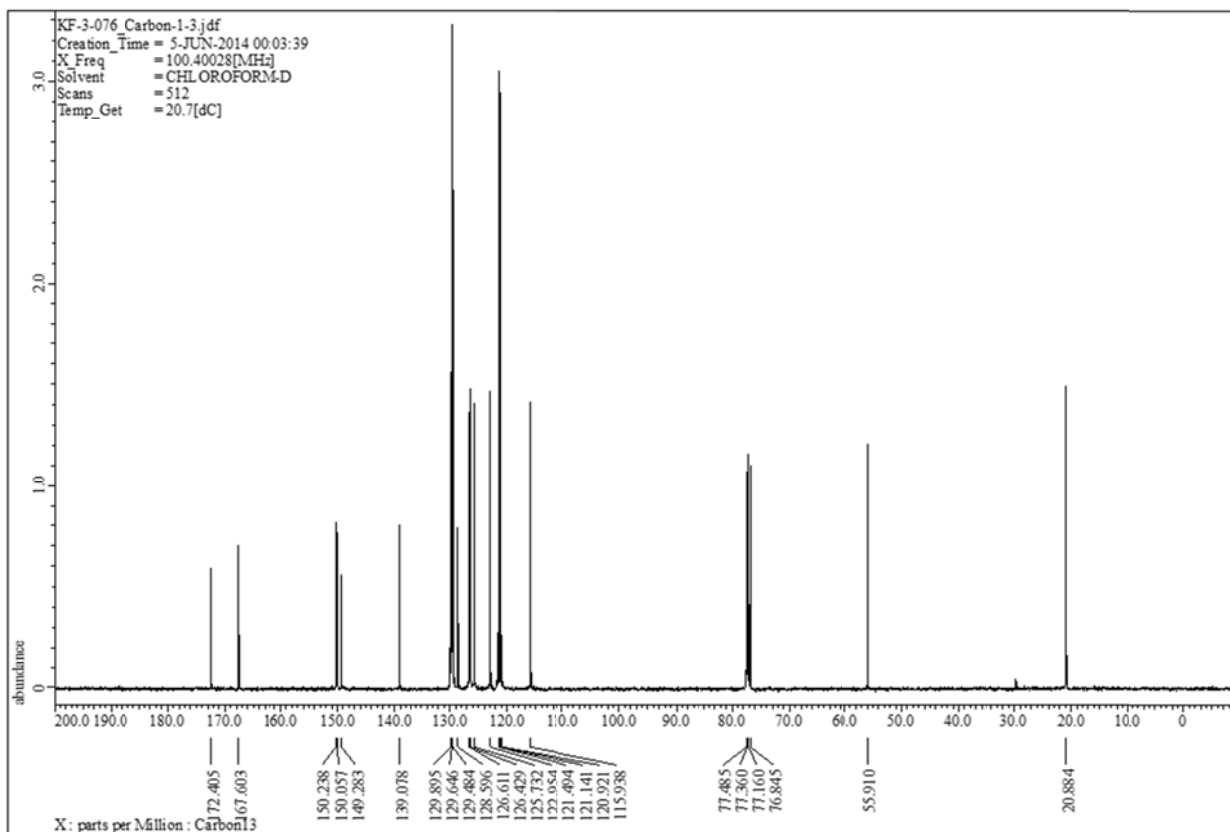

Supplementary Figure 39.  $^1\text{H}$  and  $^{13}\text{C}$ -NMR spectra for product **10a**

|                                                                                                     |                  |             |               |                                                                                                     |                  |             |               |
|-----------------------------------------------------------------------------------------------------|------------------|-------------|---------------|-----------------------------------------------------------------------------------------------------|------------------|-------------|---------------|
| 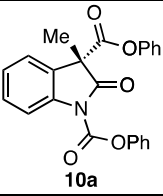 <p><b>10a</b></p> |                  |             |               |                                                                                                     |                  |             |               |
| Racemic sample of <b>10a</b>                                                                        |                  |             |               | <b>(S)-10a</b>                                                                                      |                  |             |               |
|  <p>A Ch1</p>      |                  |             |               |  <p>1DetA Ch1</p> |                  |             |               |
| <b>Peak #</b>                                                                                       | <b>Ret. Time</b> | <b>Area</b> | <b>Area %</b> | <b>Peak #</b>                                                                                       | <b>Ret. Time</b> | <b>Area</b> | <b>Area %</b> |
| 1                                                                                                   | 13.513           | 102652      | 50.170        | 1                                                                                                   | 13.023           | 35585727    | 97.805        |
| 2                                                                                                   | 14.575           | 90628       | 49.830        | 2                                                                                                   | 14.006           | 286167      | 2.195         |

**Supplementary Figure 40.** HPLC spectra for product **10a** of Steglich rearrangement on multi-gram scale (see Figure 4b [and Supplementary Methods](#)).

|                                                                                                       |                  |             |               |                                                                                                       |                  |             |               |
|-------------------------------------------------------------------------------------------------------|------------------|-------------|---------------|-------------------------------------------------------------------------------------------------------|------------------|-------------|---------------|
| 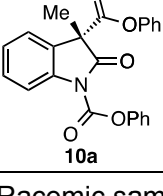 <p><b>10a</b></p> |                  |             |               |                                                                                                       |                  |             |               |
| Racemic sample of <b>10a</b>                                                                          |                  |             |               | <b>(S)-10a</b>                                                                                        |                  |             |               |
|  <p>A Ch1</p>      |                  |             |               |  <p>1DetA Ch1</p> |                  |             |               |
| <b>Peak #</b>                                                                                         | <b>Ret. Time</b> | <b>Area</b> | <b>Area %</b> | <b>Peak #</b>                                                                                         | <b>Ret. Time</b> | <b>Area</b> | <b>Area %</b> |
| 1                                                                                                     | 13.513           | 102652      | 50.170        | 1                                                                                                     | 13.321           | 15845757    | 97.712        |
| 2                                                                                                     | 14.575           | 90628       | 49.830        | 2                                                                                                     | 14.399           | 370968      | 2.288         |

**Supplementary Figure 41.** HPLC spectra for product **10a** of Steglich rearrangement with recovered catalyst **1j** (see [Supplementary Methods](#)).

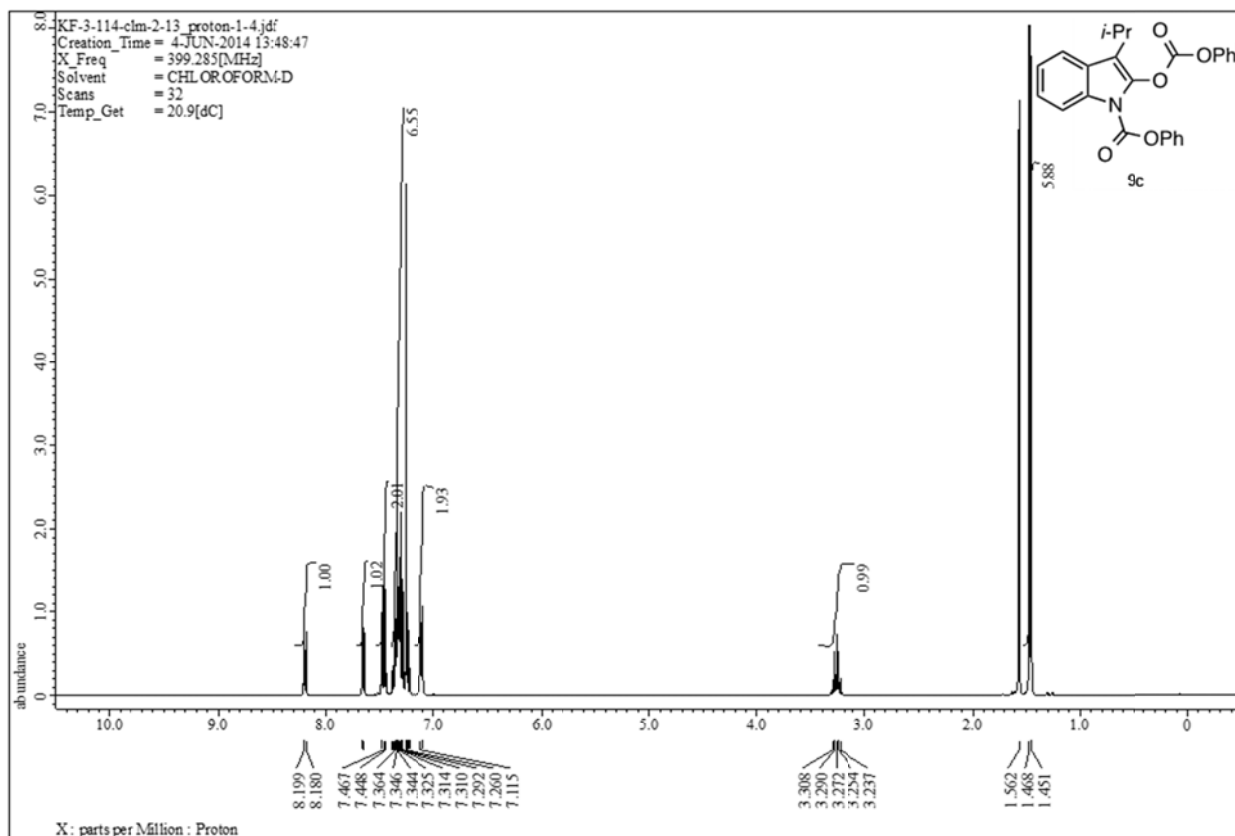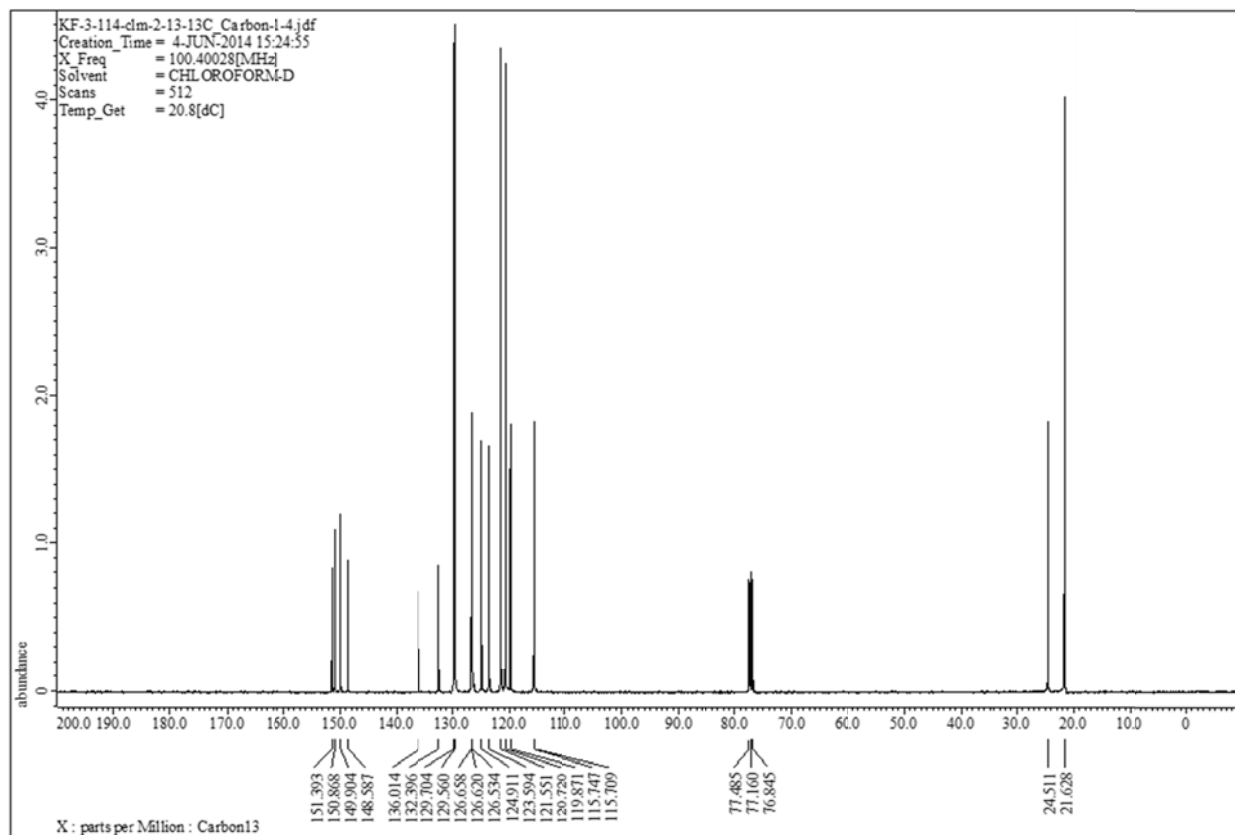

Supplementary Figure 42.  $^1\text{H}$  and  $^{13}\text{C}$ -NMR spectra for substrate **9c**

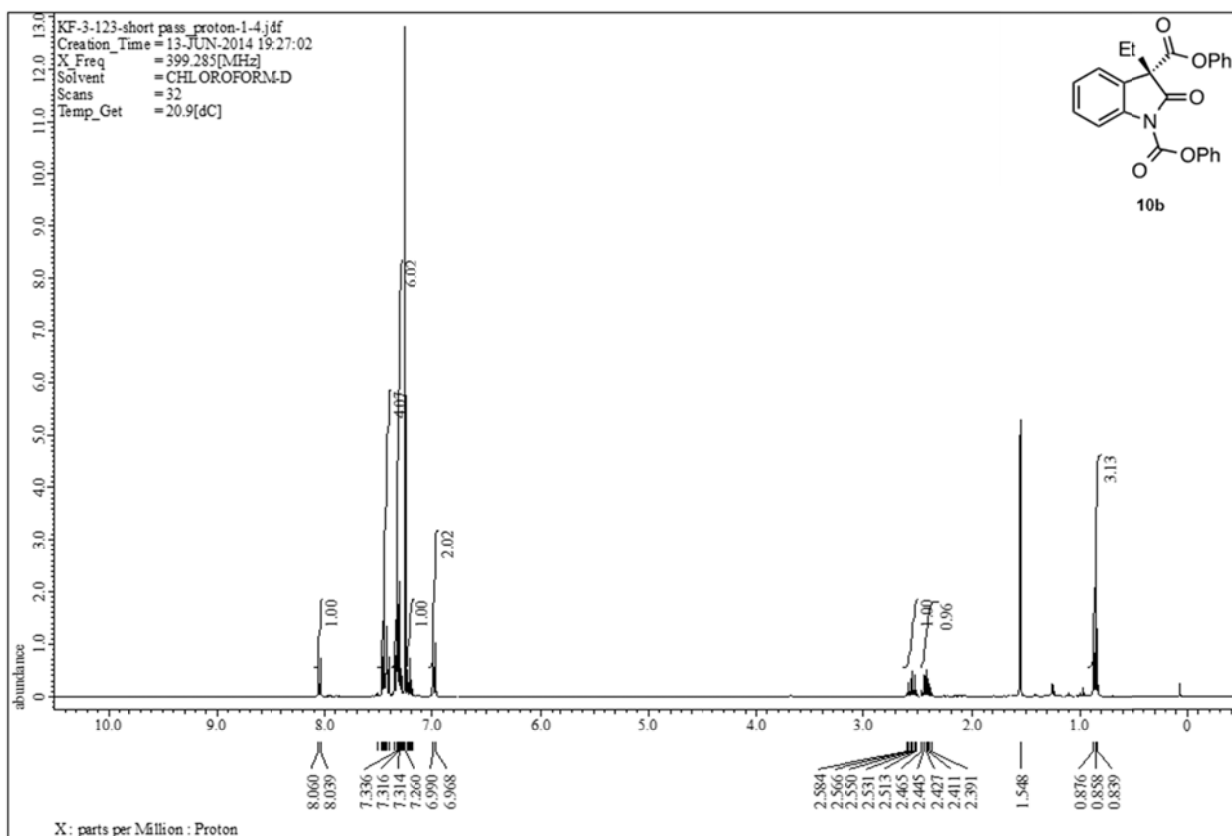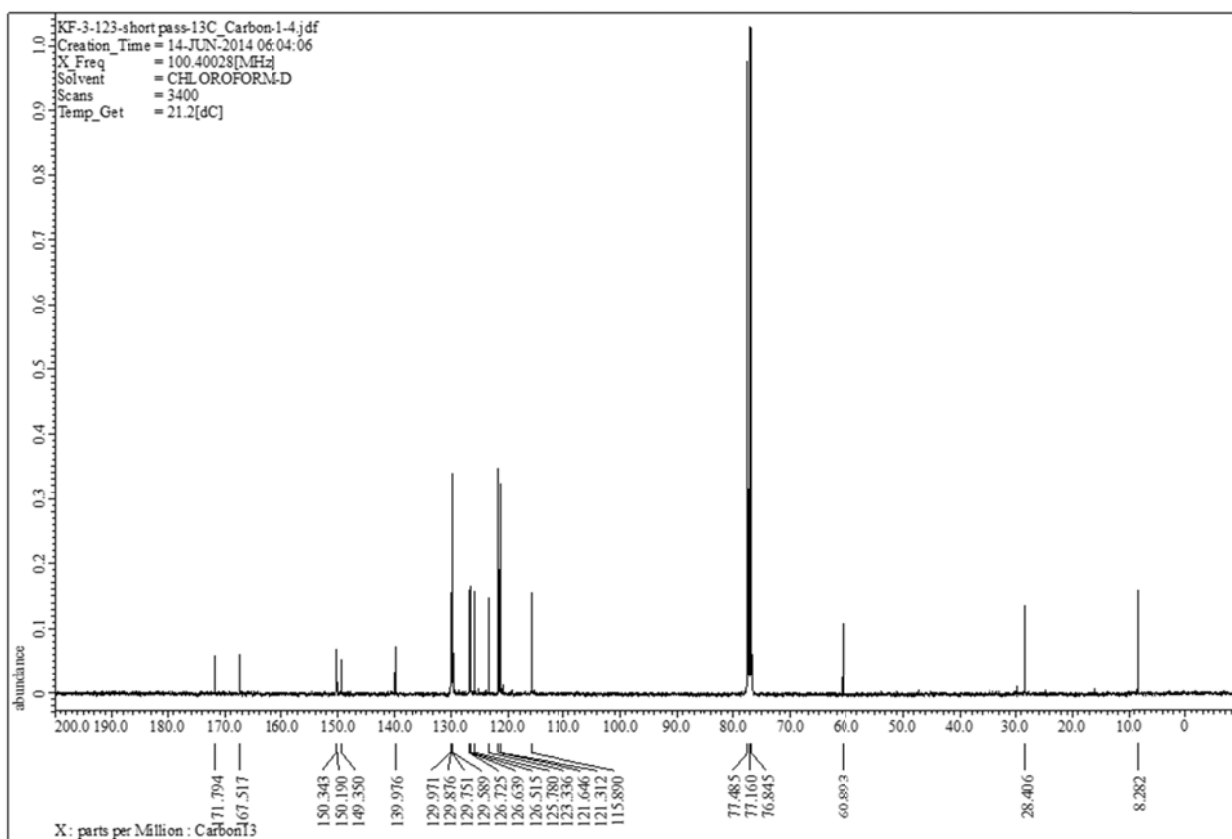

Supplementary Figure 43.  $^1\text{H}$  and  $^{13}\text{C}$ -NMR spectra for product **10b**

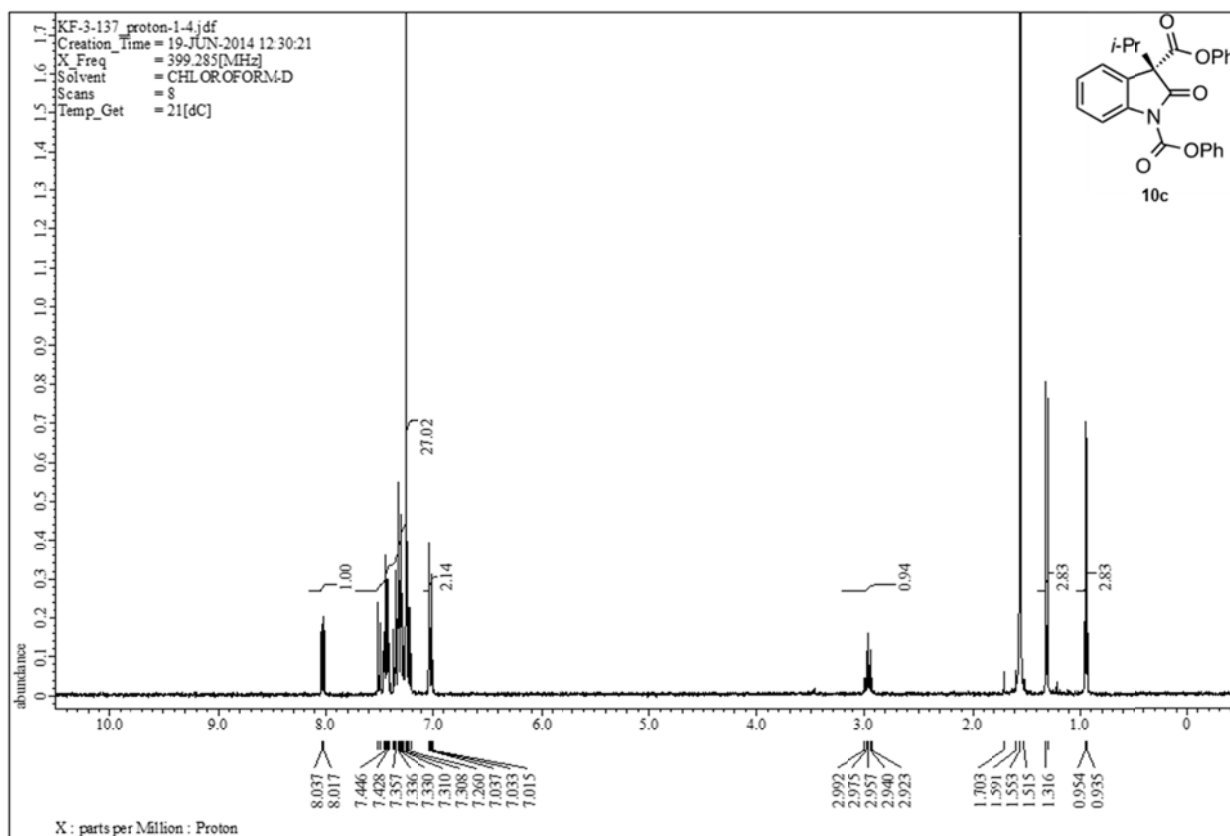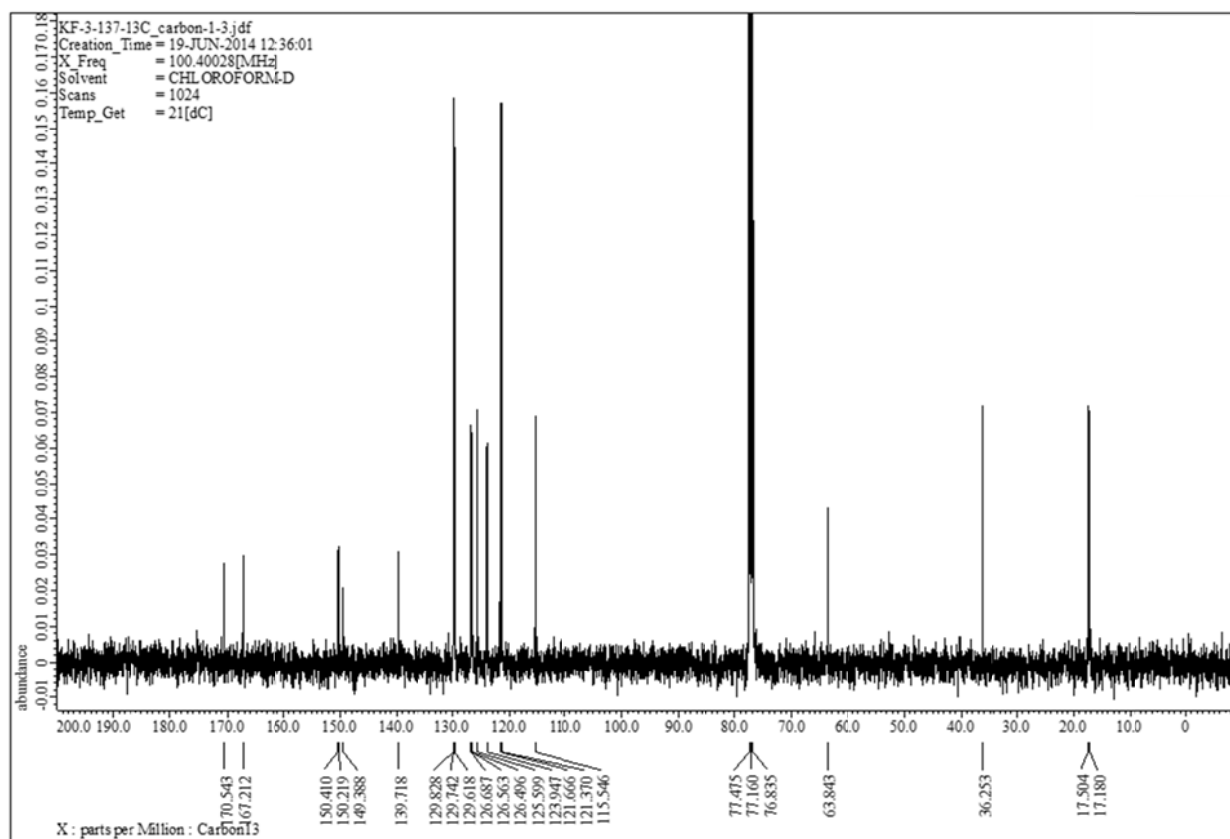

Supplementary Figure 44.  $^1\text{H}$  and  $^{13}\text{C}$ -NMR spectra for product 10c



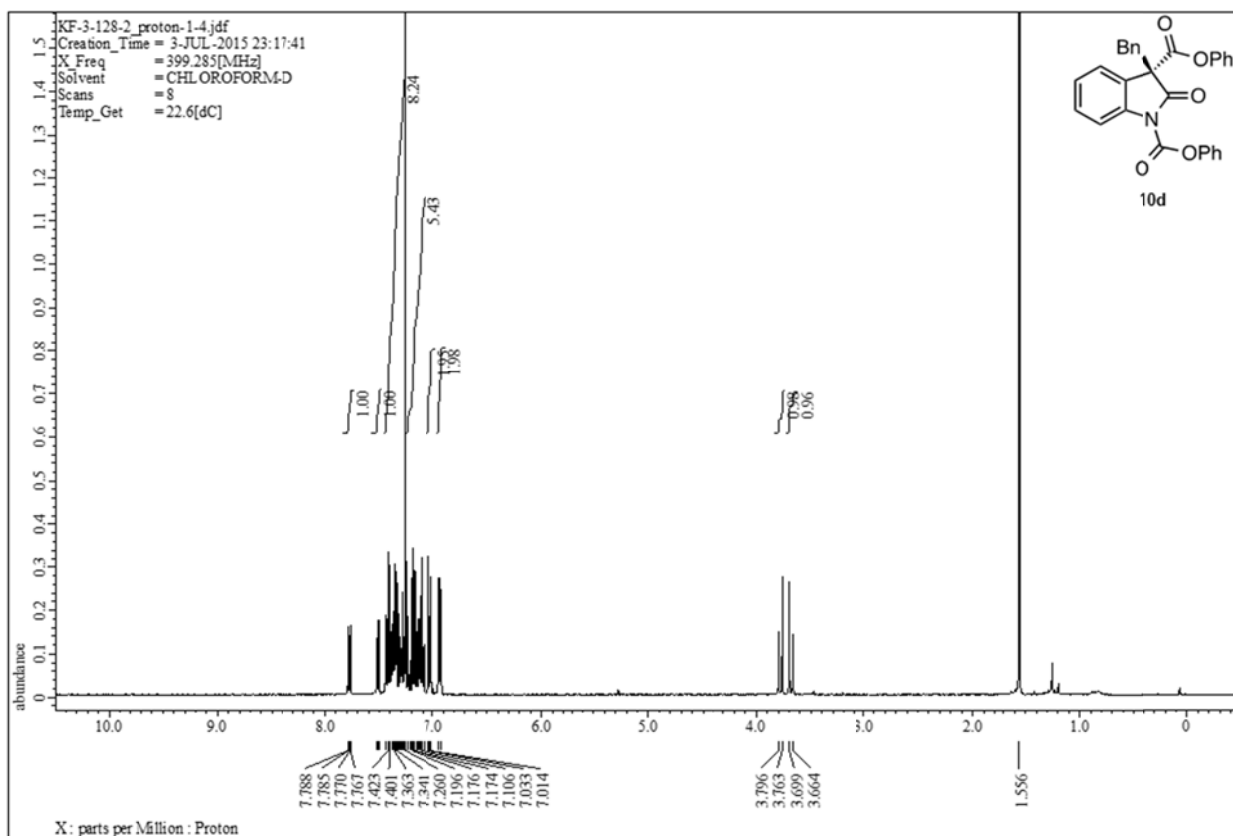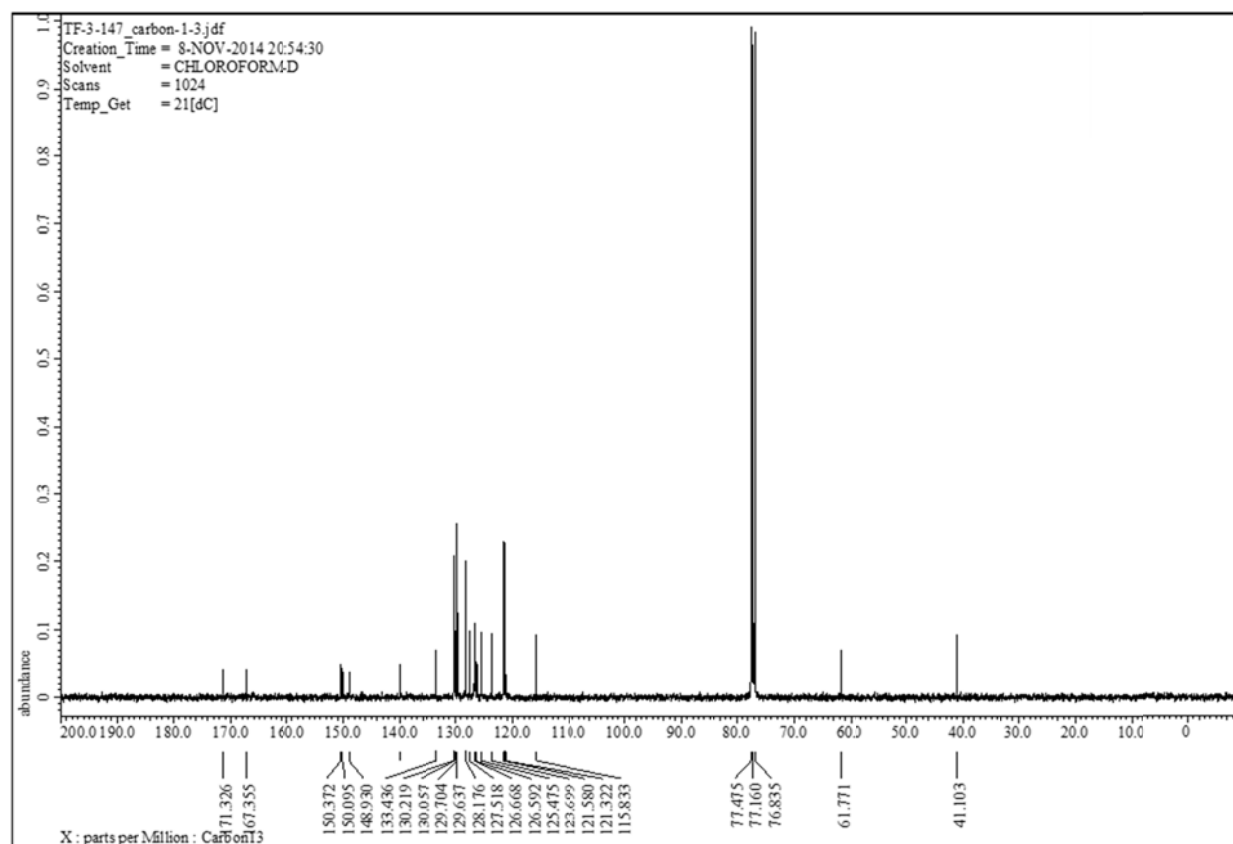

Supplementary Figure 45.  $^1\text{H}$  and  $^{13}\text{C}$ -NMR spectra for product **10d**

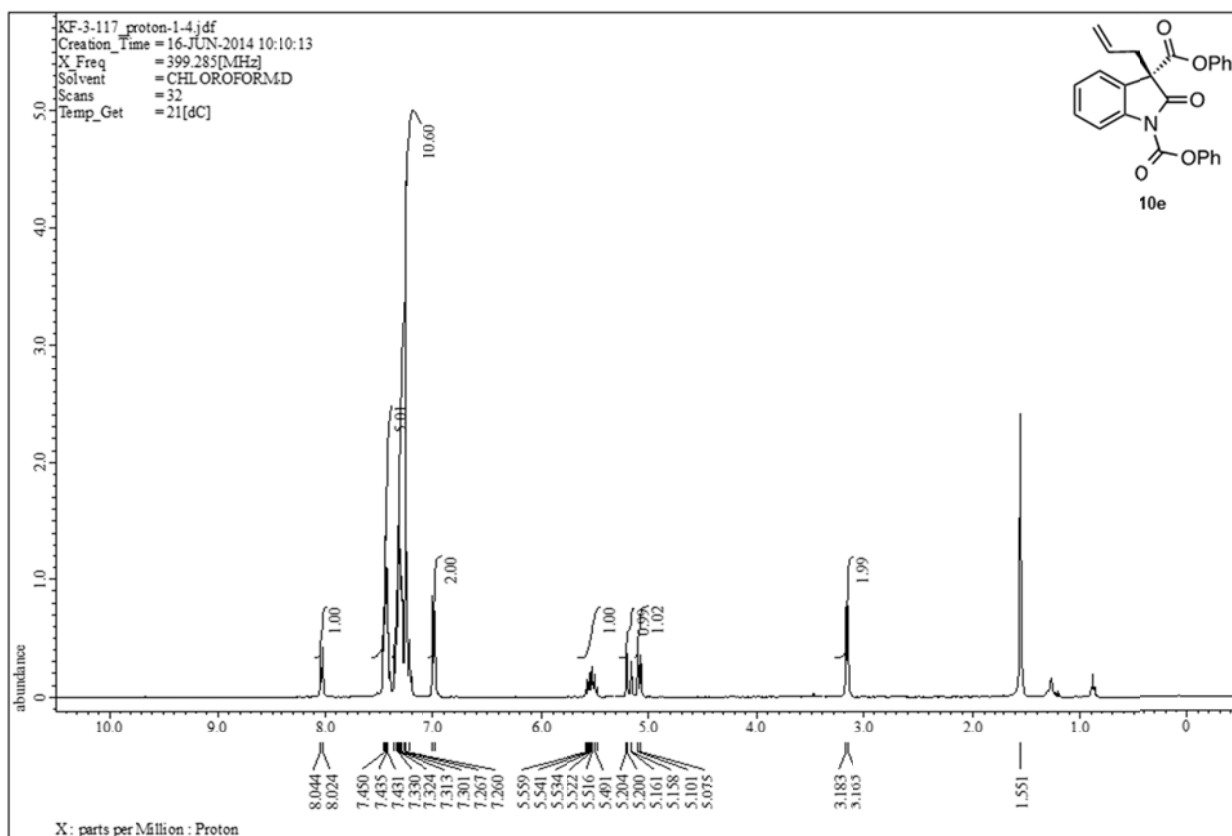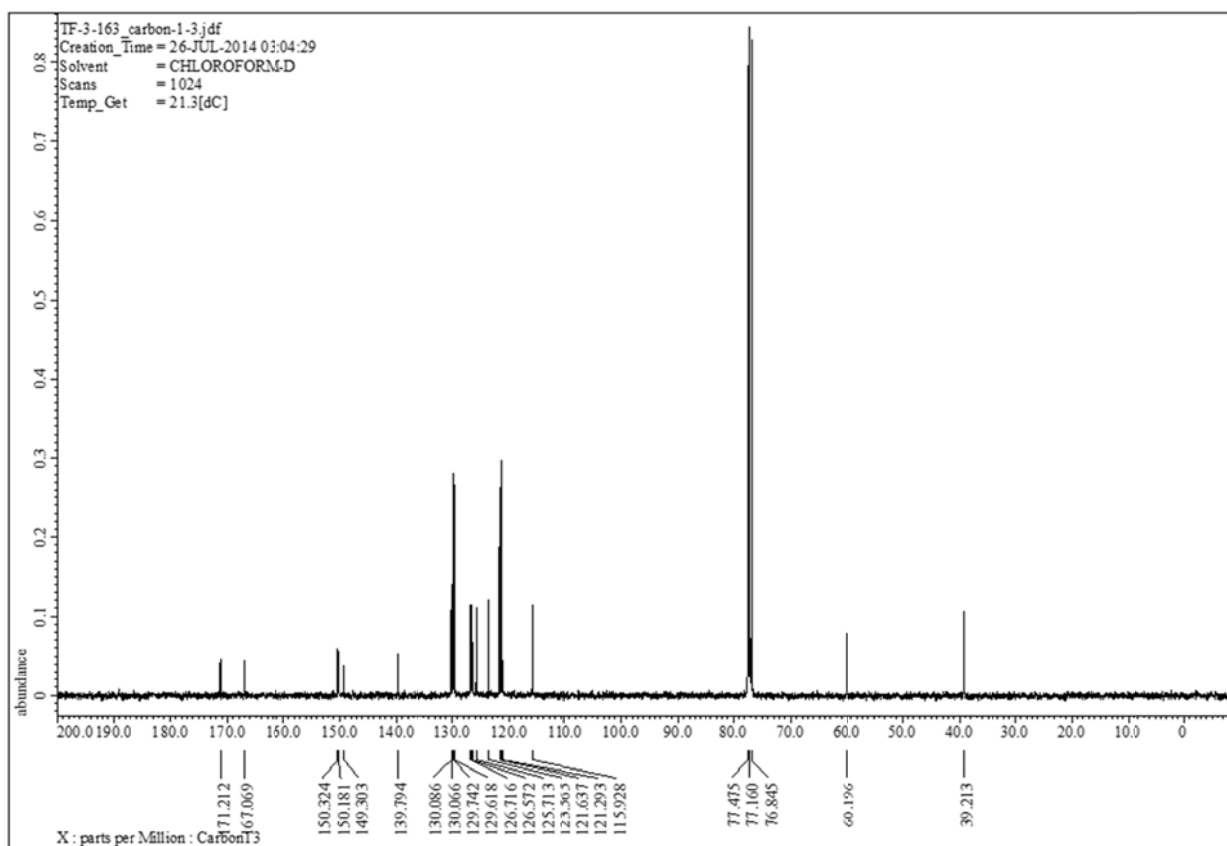

Supplementary Figure 46.  $^1\text{H}$  and  $^{13}\text{C}$ -NMR spectra for product 10e

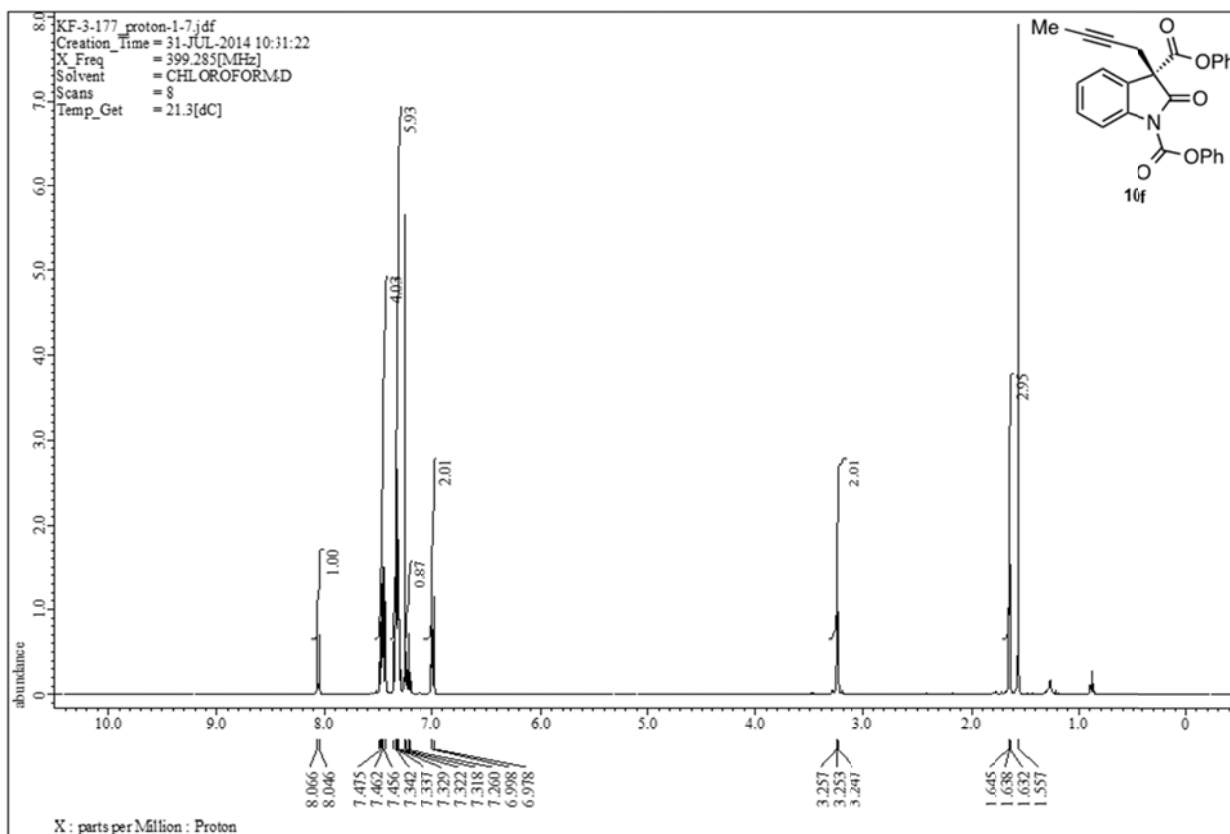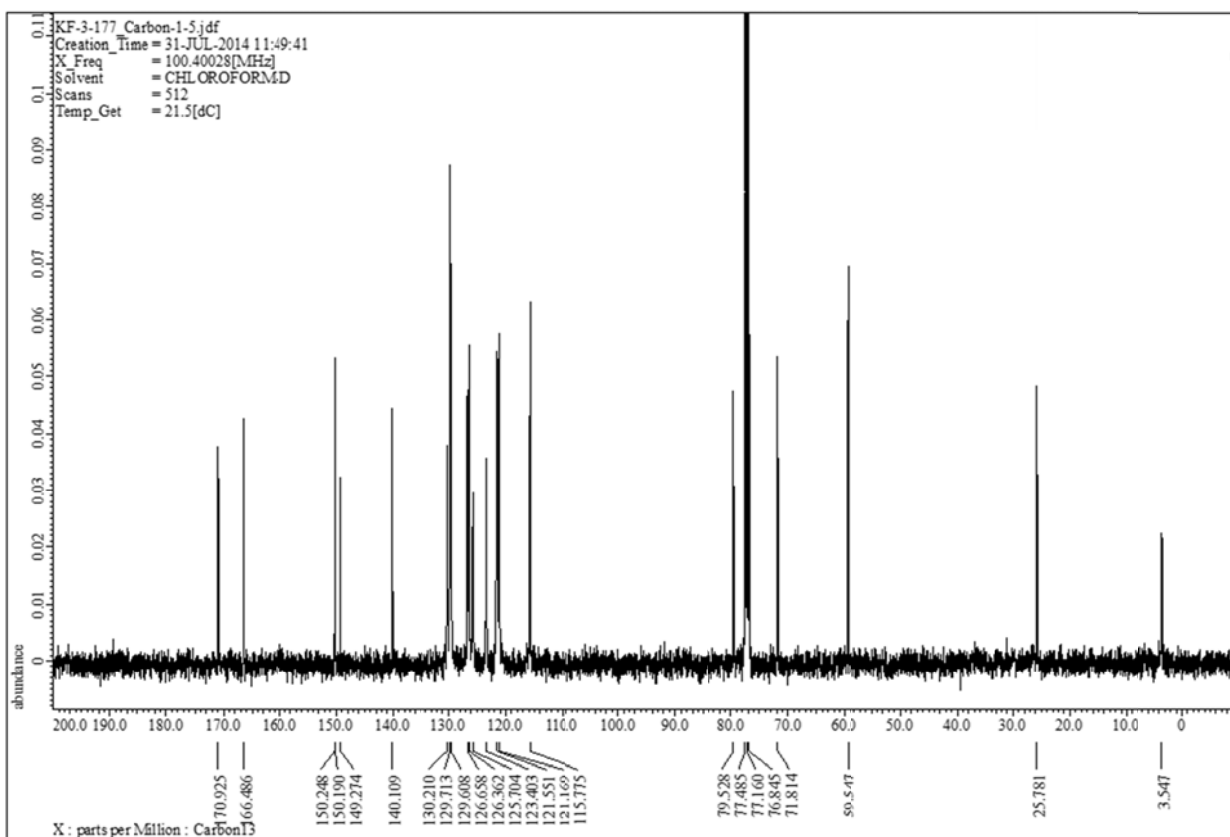

Supplementary Figure 47.  $^1\text{H}$  and  $^{13}\text{C}$ -NMR spectra for product **10f**

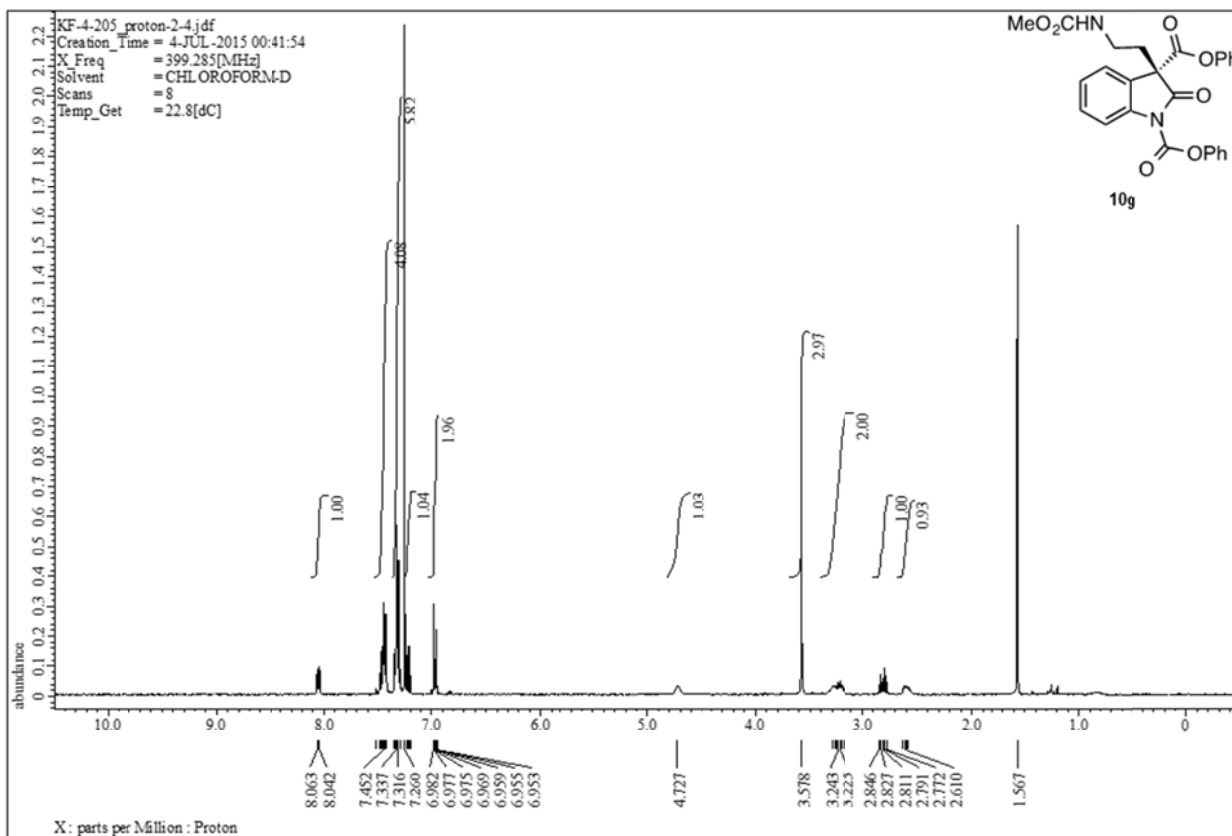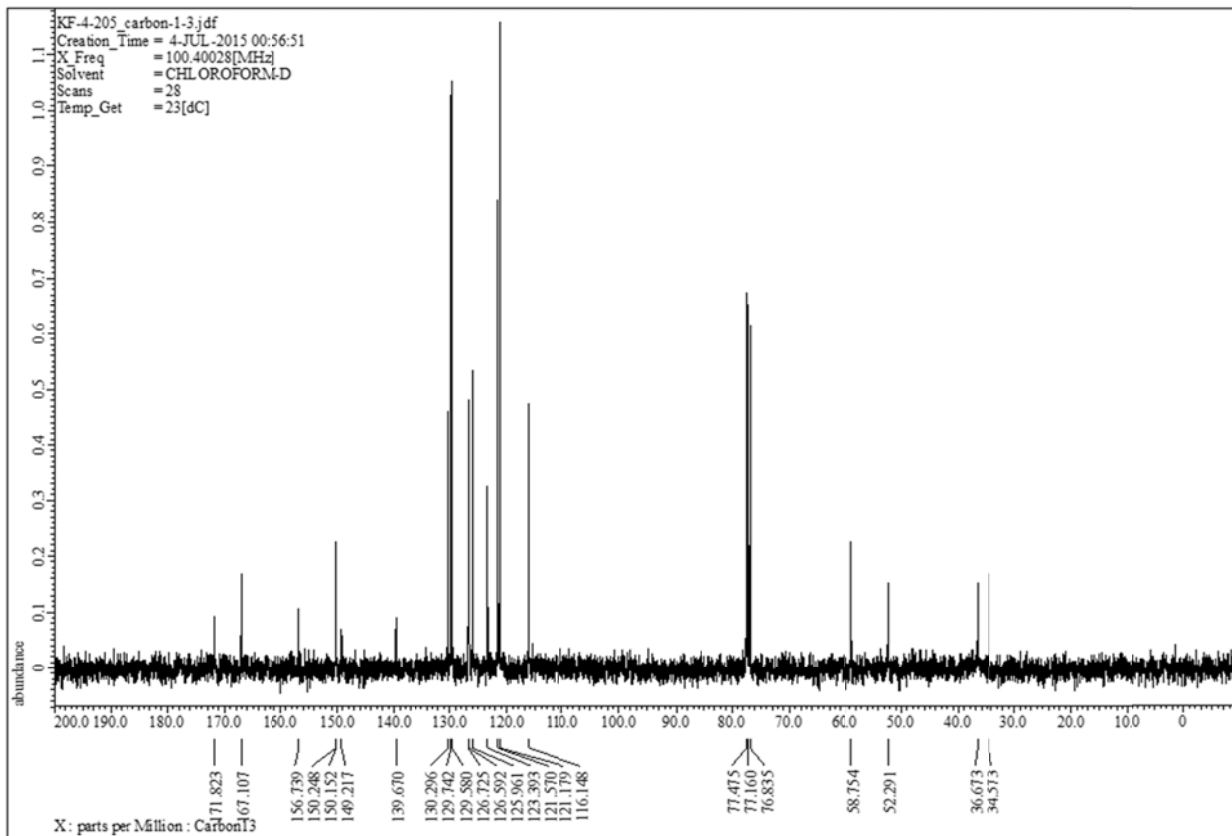

Supplementary Figure 48.  $^1\text{H}$  and  $^{13}\text{C}$ -NMR spectra for product **10g**

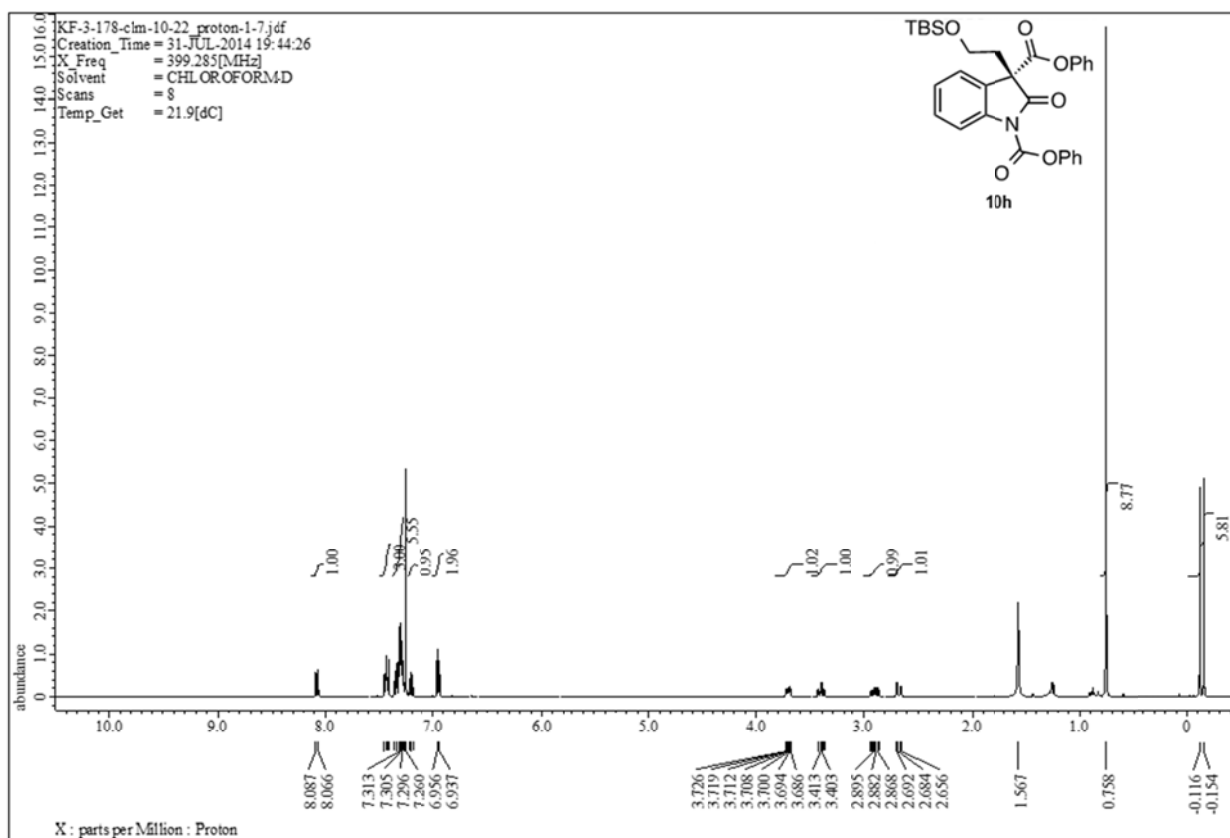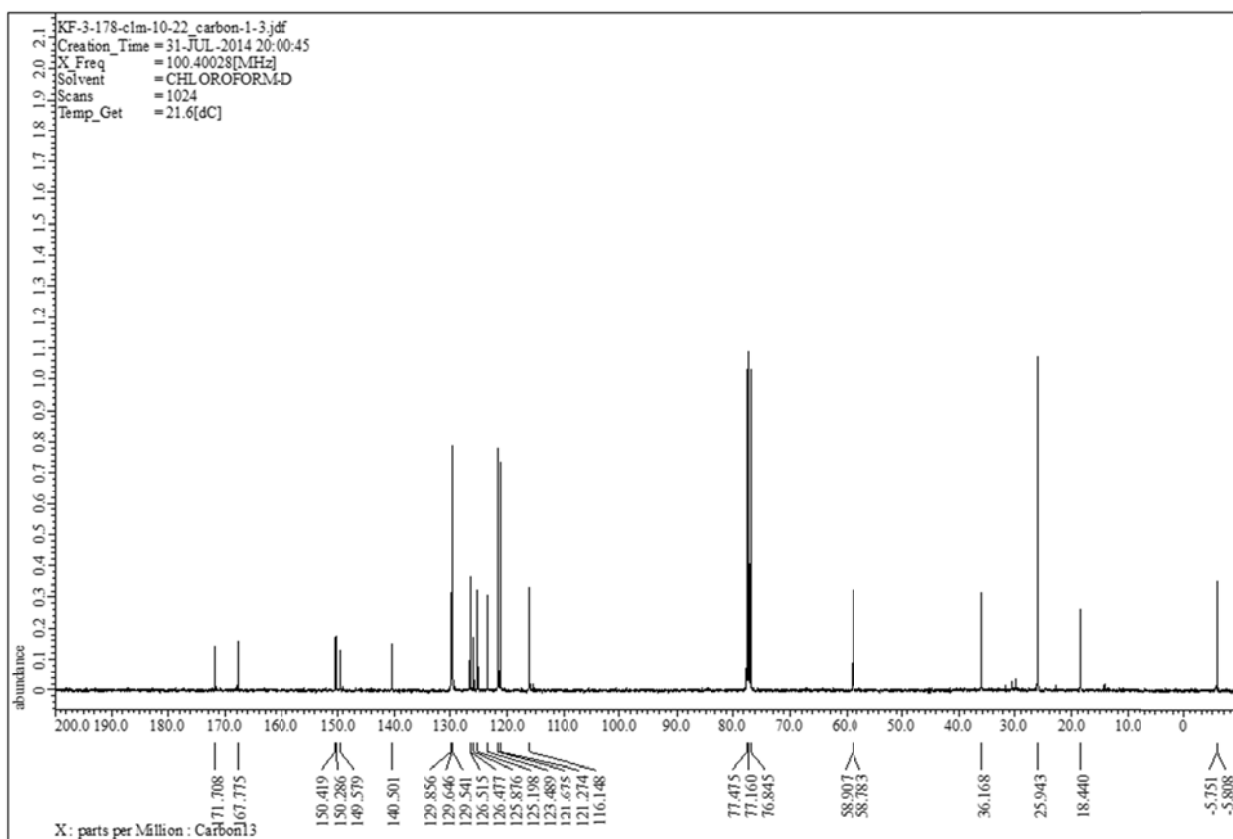

Supplementary Figure 49. <sup>1</sup>H and <sup>13</sup>C-NMR spectra for product 10h

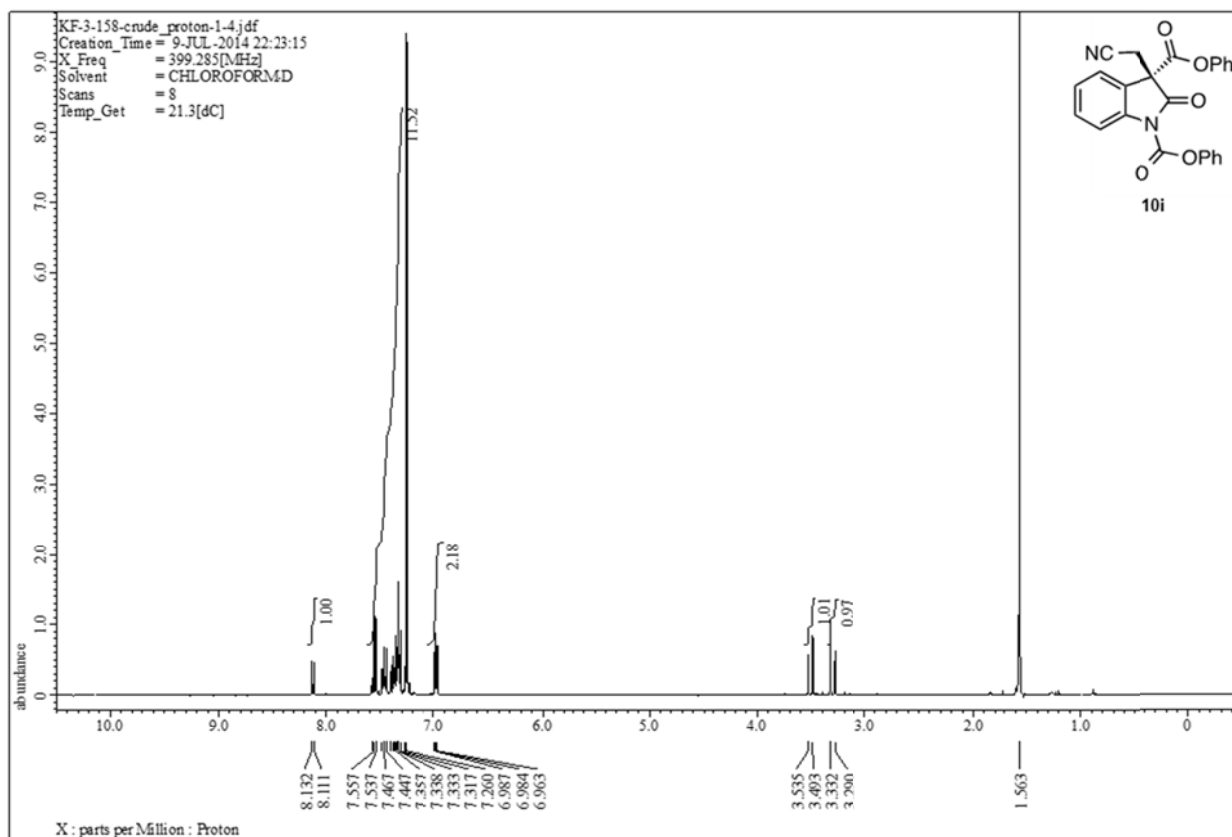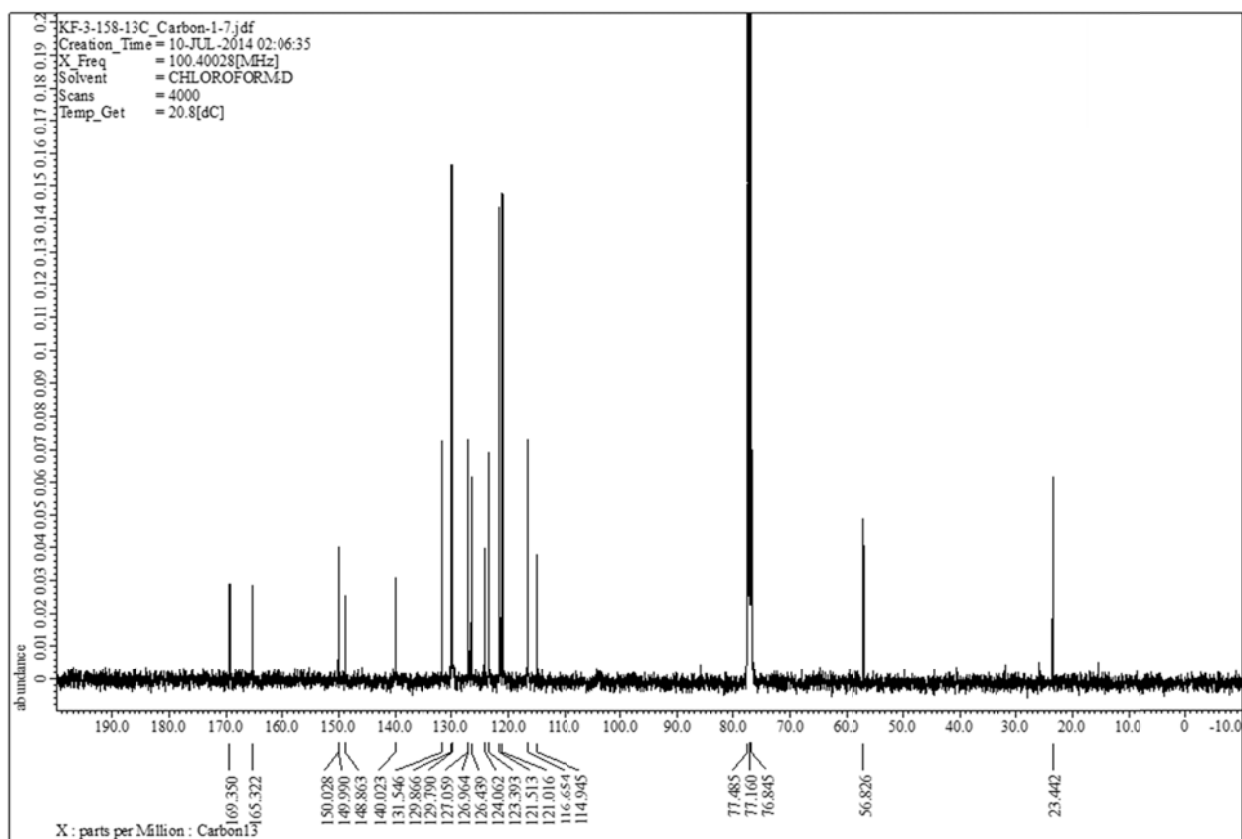

Supplementary Figure 50.  $^1\text{H}$  and  $^{13}\text{C}$ -NMR spectra for product **10i**



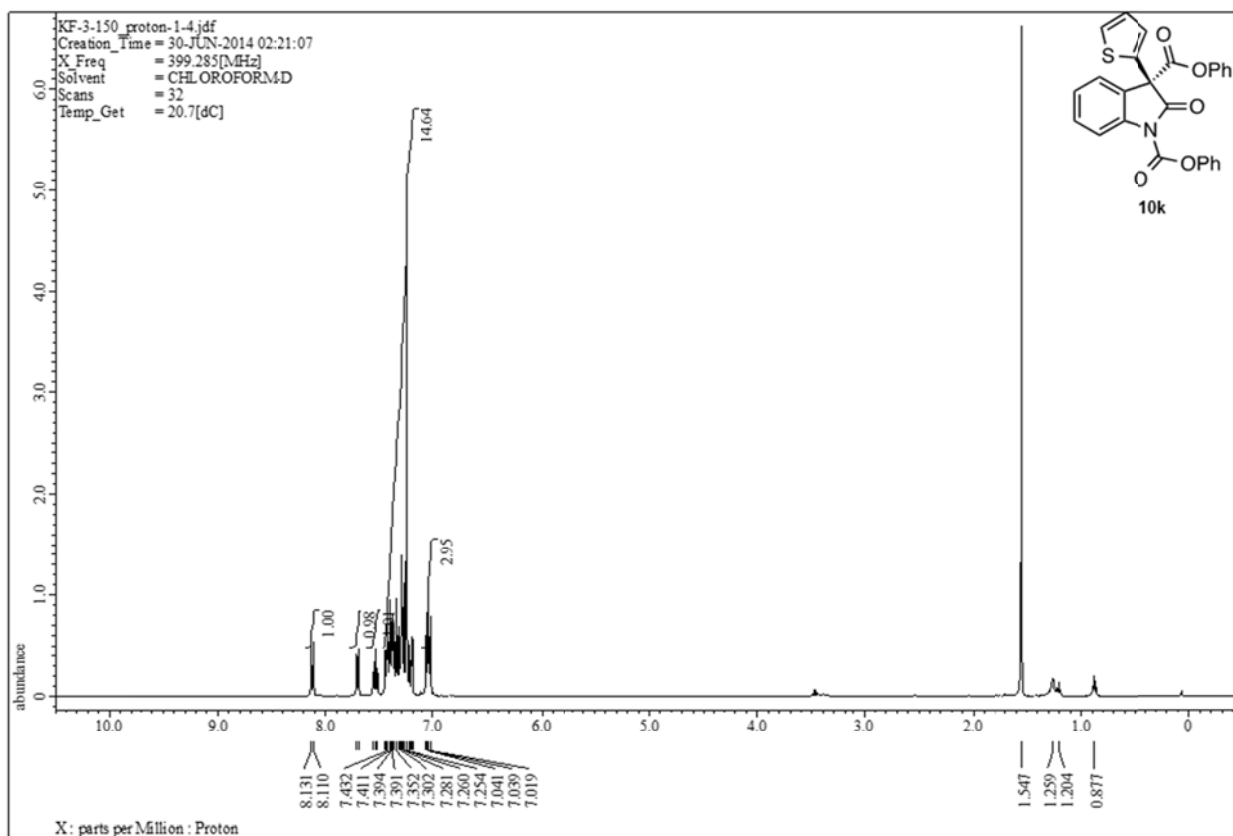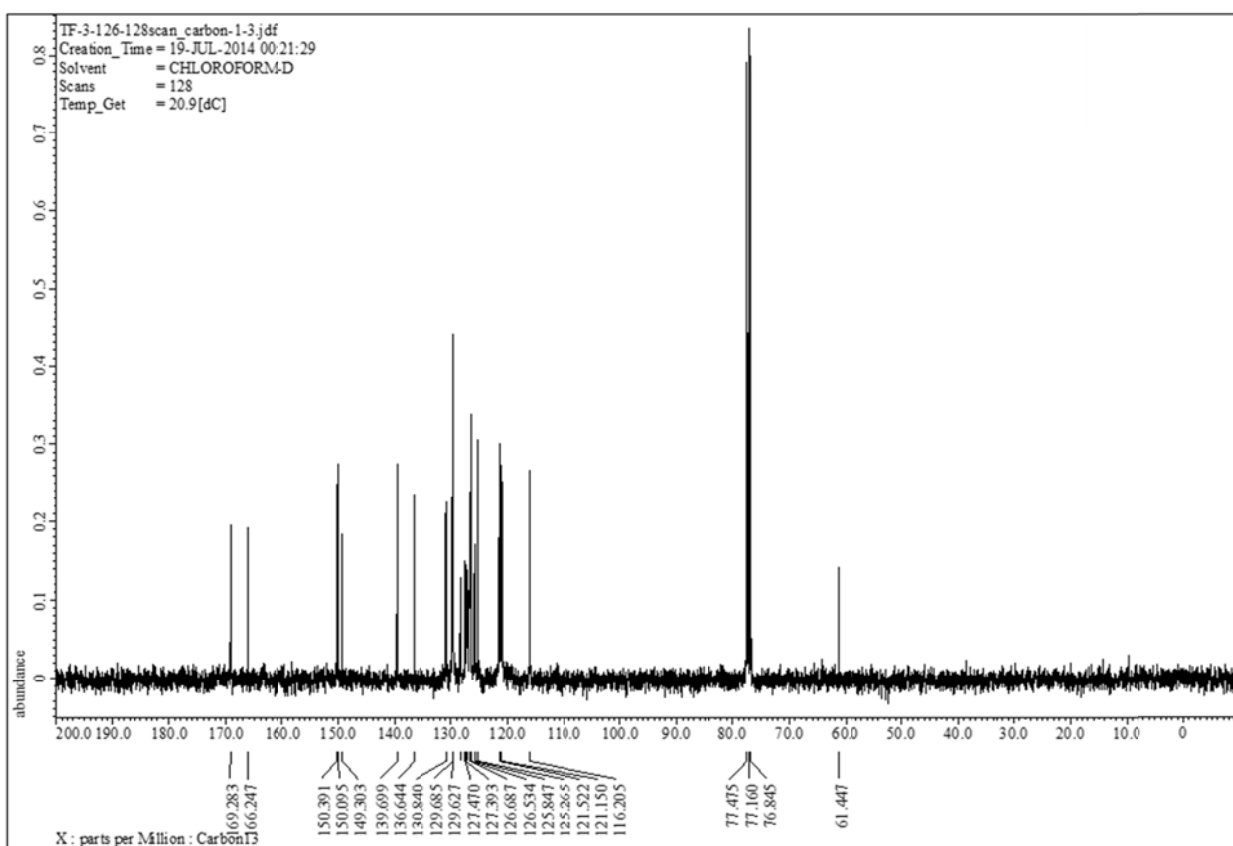

Supplementary Figure 52.  $^1\text{H}$  and  $^{13}\text{C}$ -NMR spectra for product **10k**



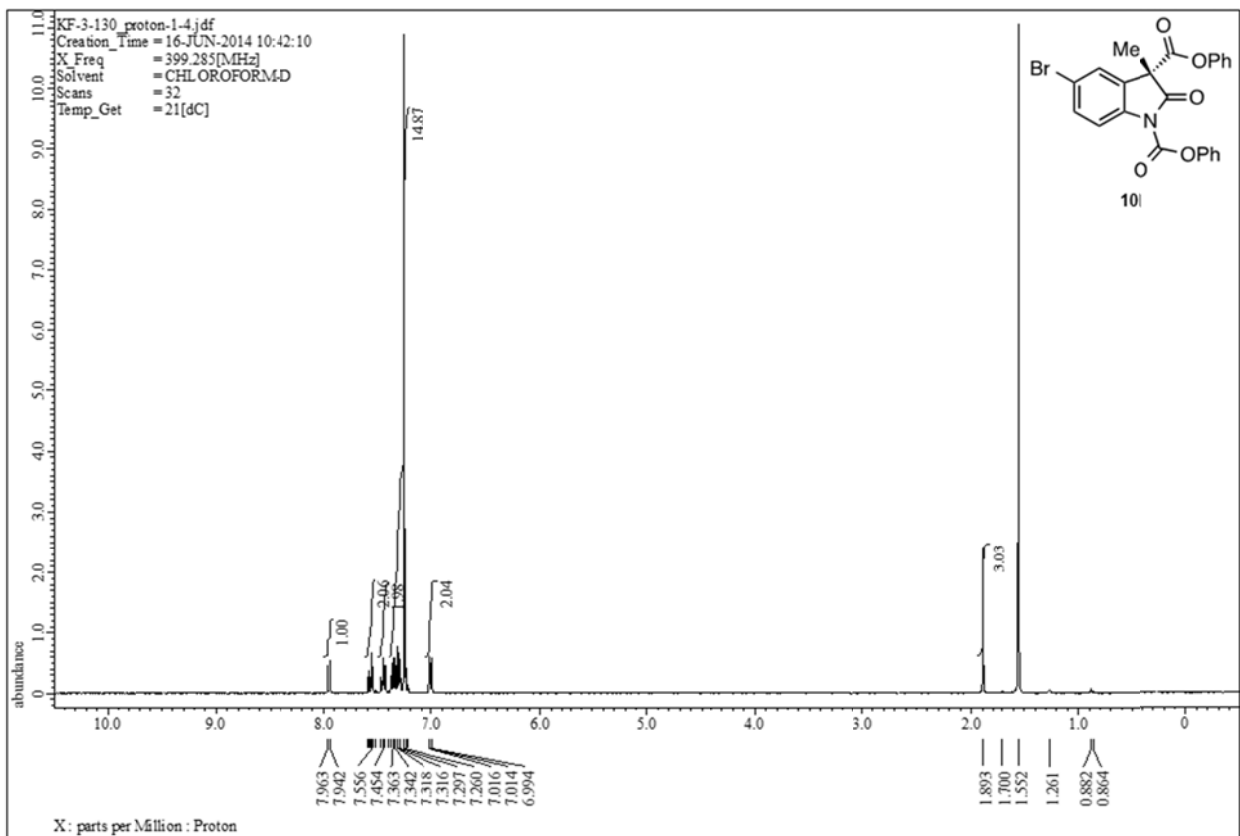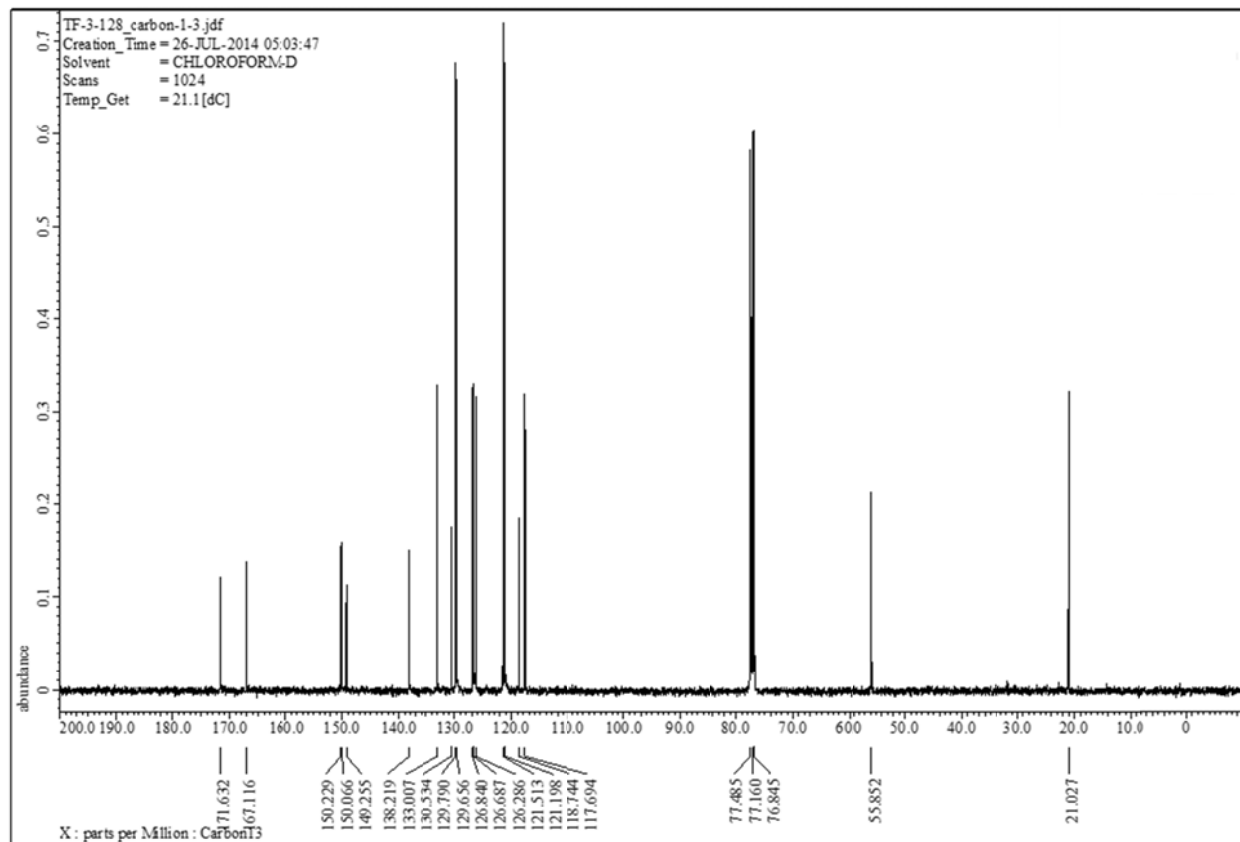

Supplementary Figure S3.  $^1\text{H}$  and  $^{13}\text{C}$ -NMR spectra for product 101

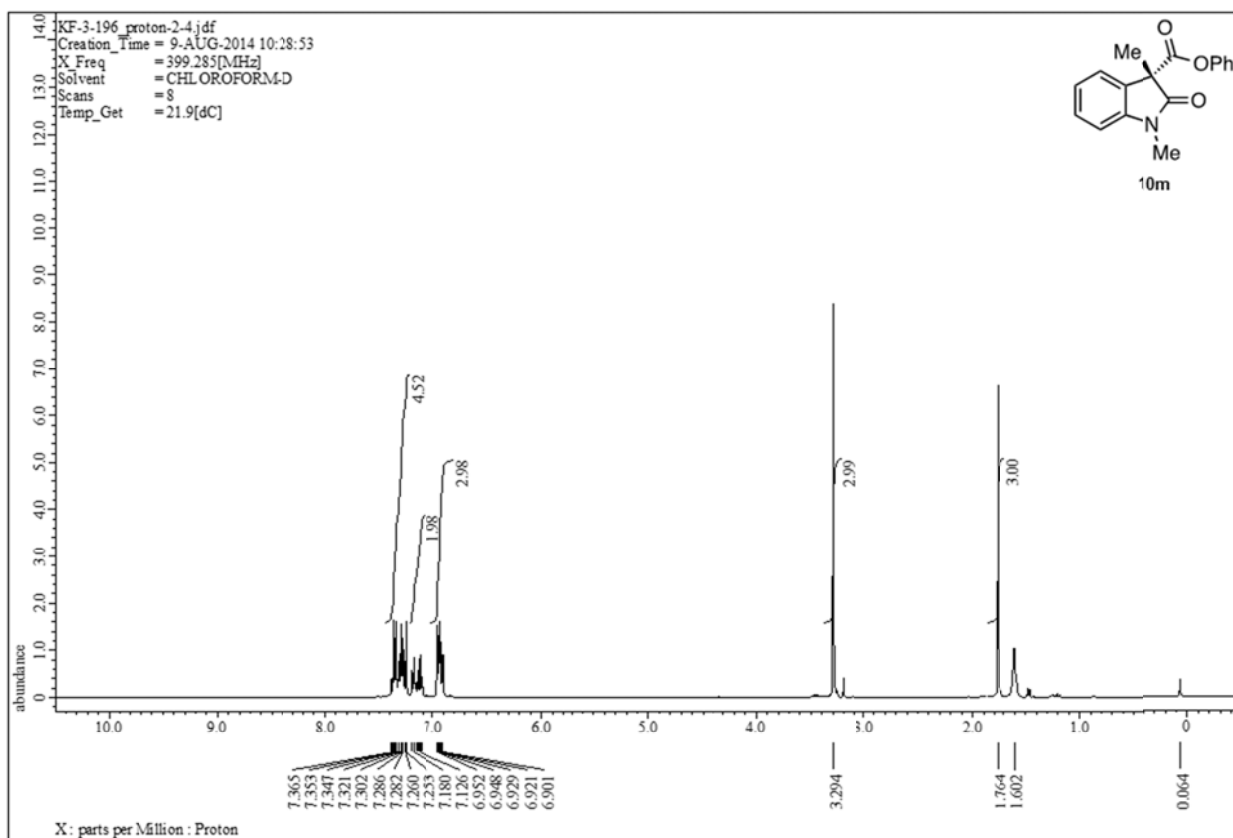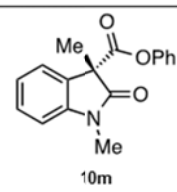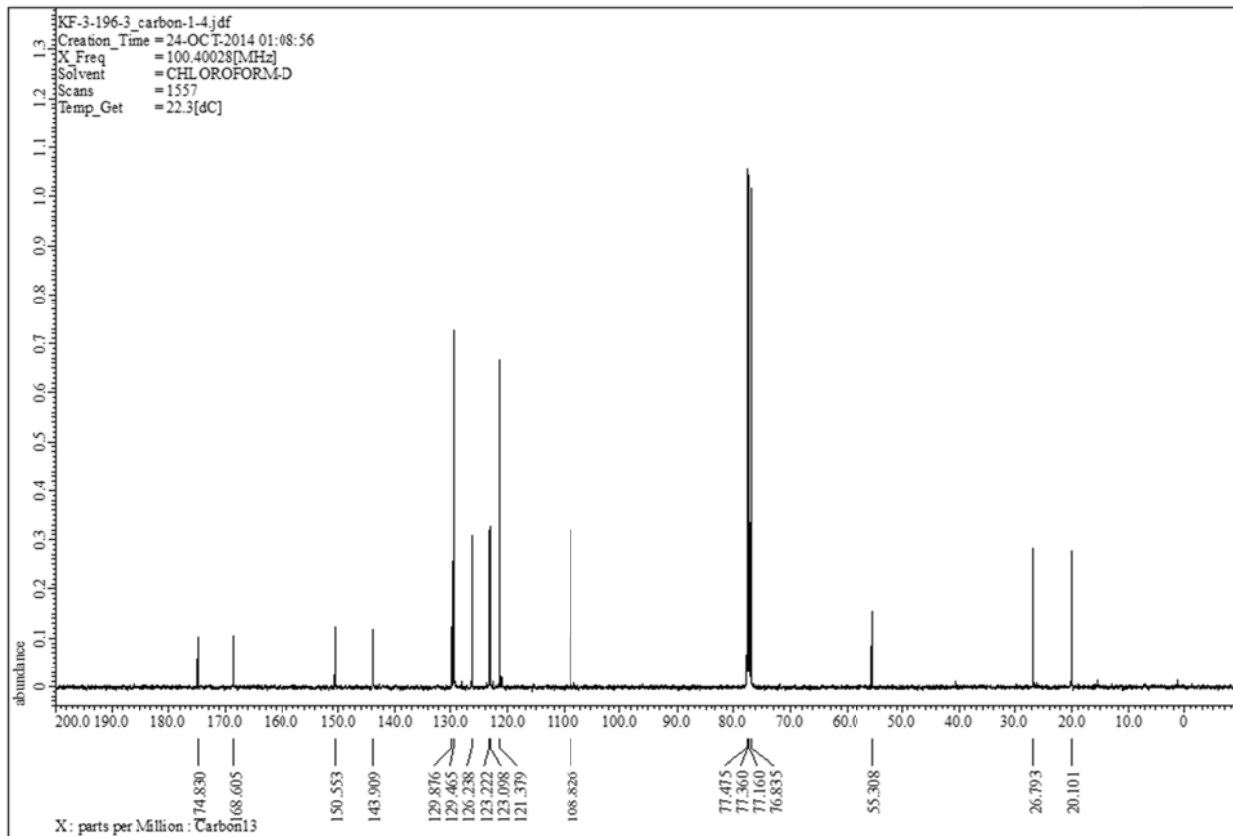

Supplementary Figure 54.  $^1\text{H}$  and  $^{13}\text{C}$ -NMR spectra for product **10m**

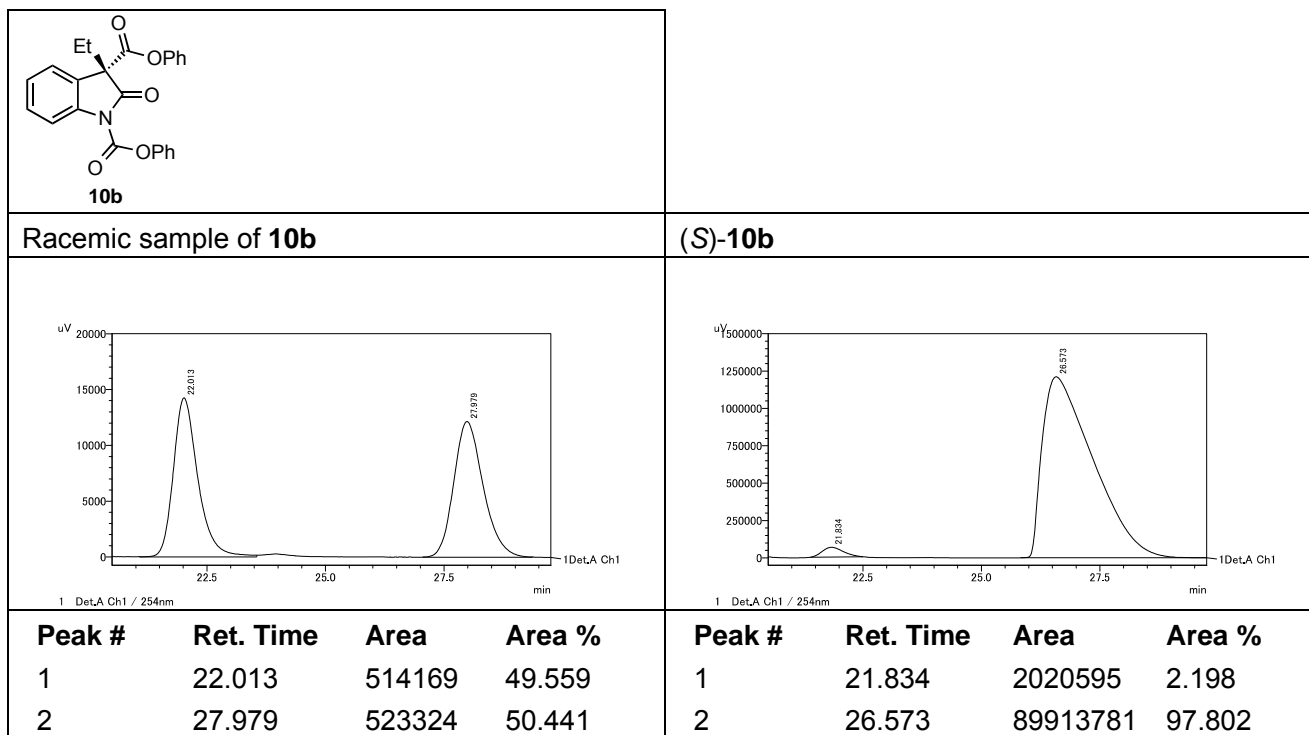

**Supplementary Figure 55.** HPLC spectra for product **10b** of Steglich rearrangement with catalyst **1j** (see Figure 5)

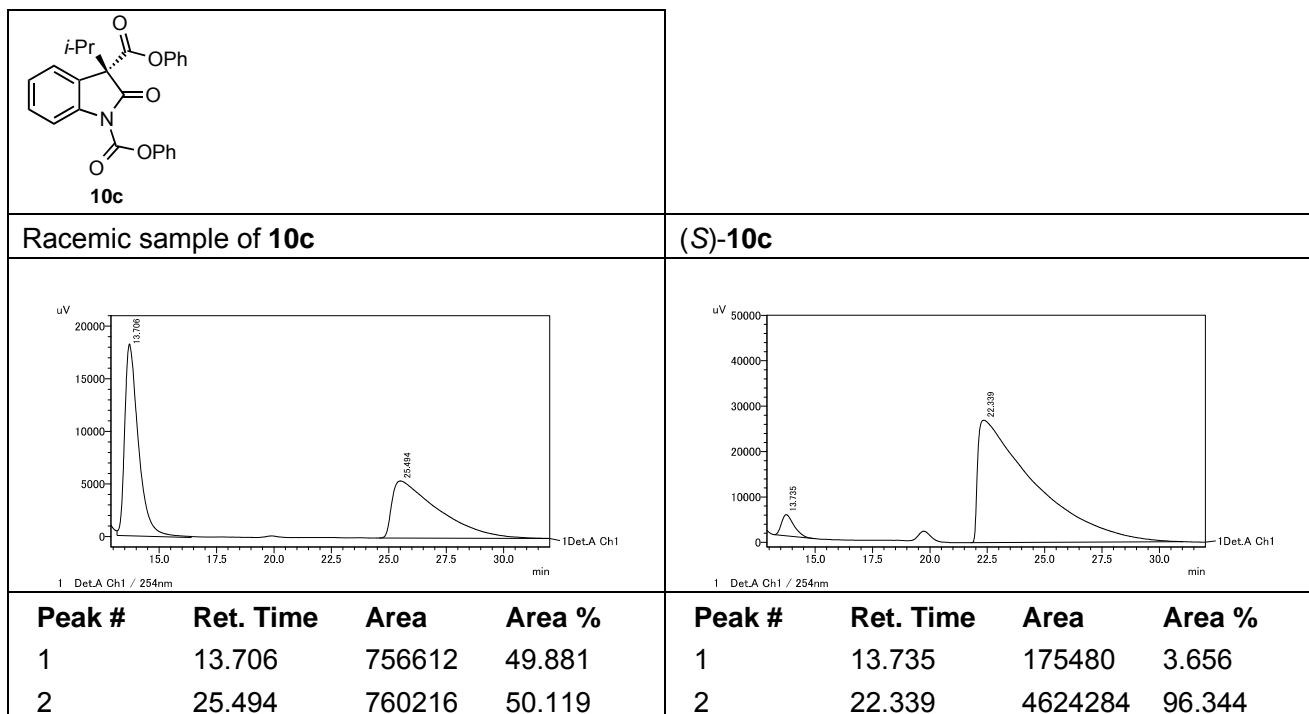

**Supplementary Figure 56.** HPLC spectra for product **10c** of Steglich rearrangement with catalyst **1j** (see Figure 5)

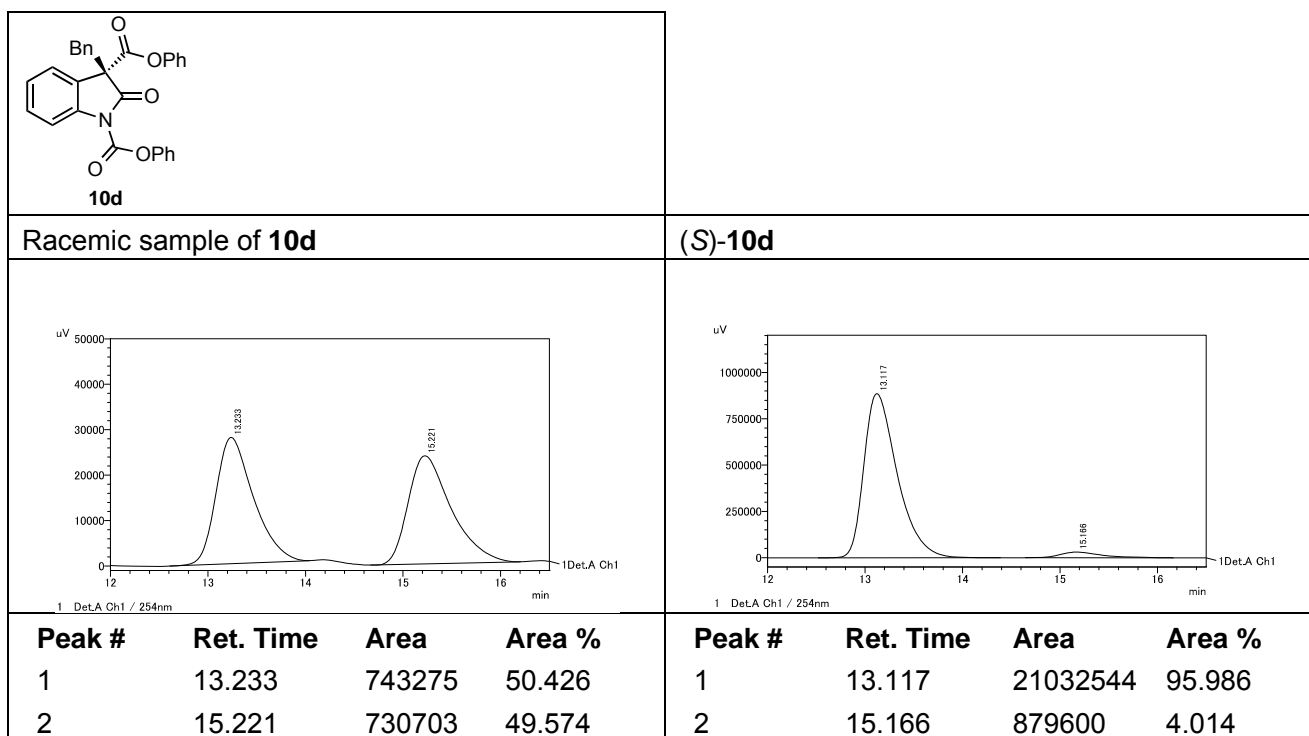

**Supplementary Figure 57.** HPLC spectra for product **10d** of Steglich rearrangement with catalyst **1j** (see Figure 5)

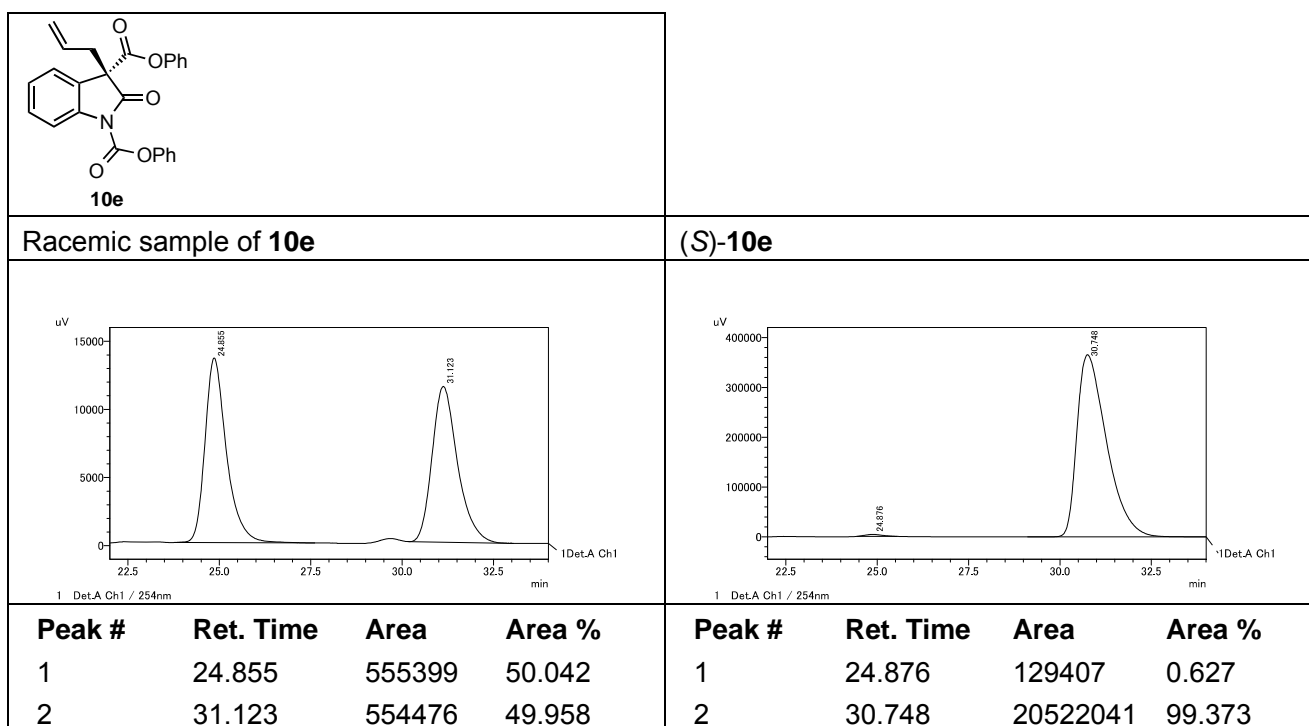

**Supplementary Figure 58.** HPLC spectra for product **10e** of Steglich rearrangement with catalyst **1j** (see Figure 5)

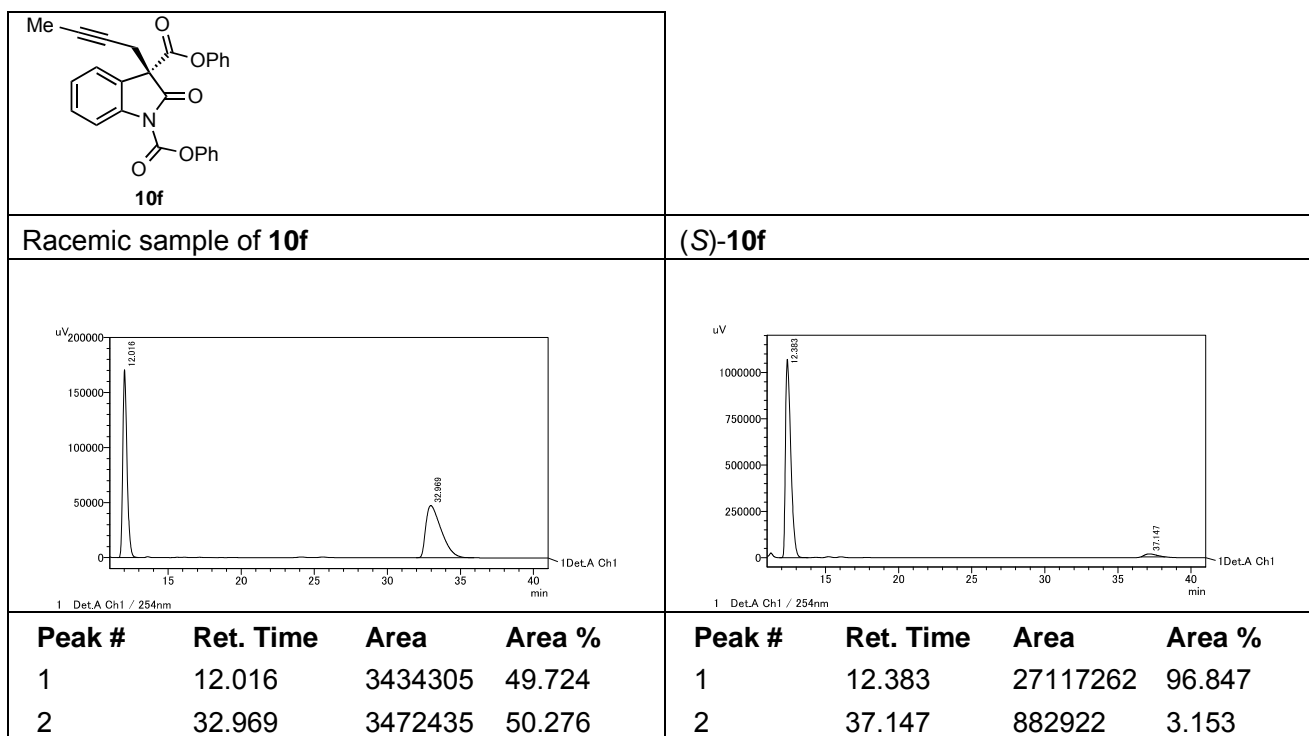

**Supplementary Figure 59.** HPLC spectra for product **10f** of Steglich rearrangement with catalyst **1j** (see Figure 5)

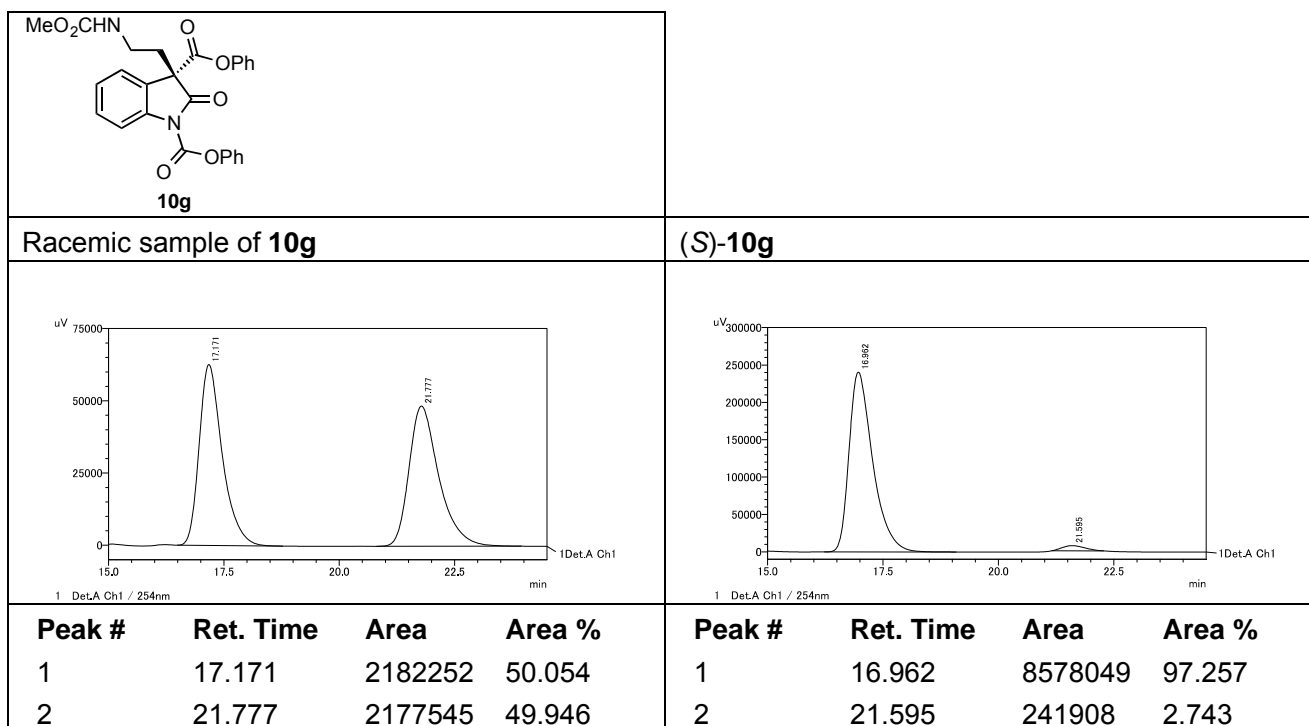

**Supplementary Figure 60.** HPLC spectra for product **10g** of Steglich rearrangement with catalyst **1j** (see Figure 5)

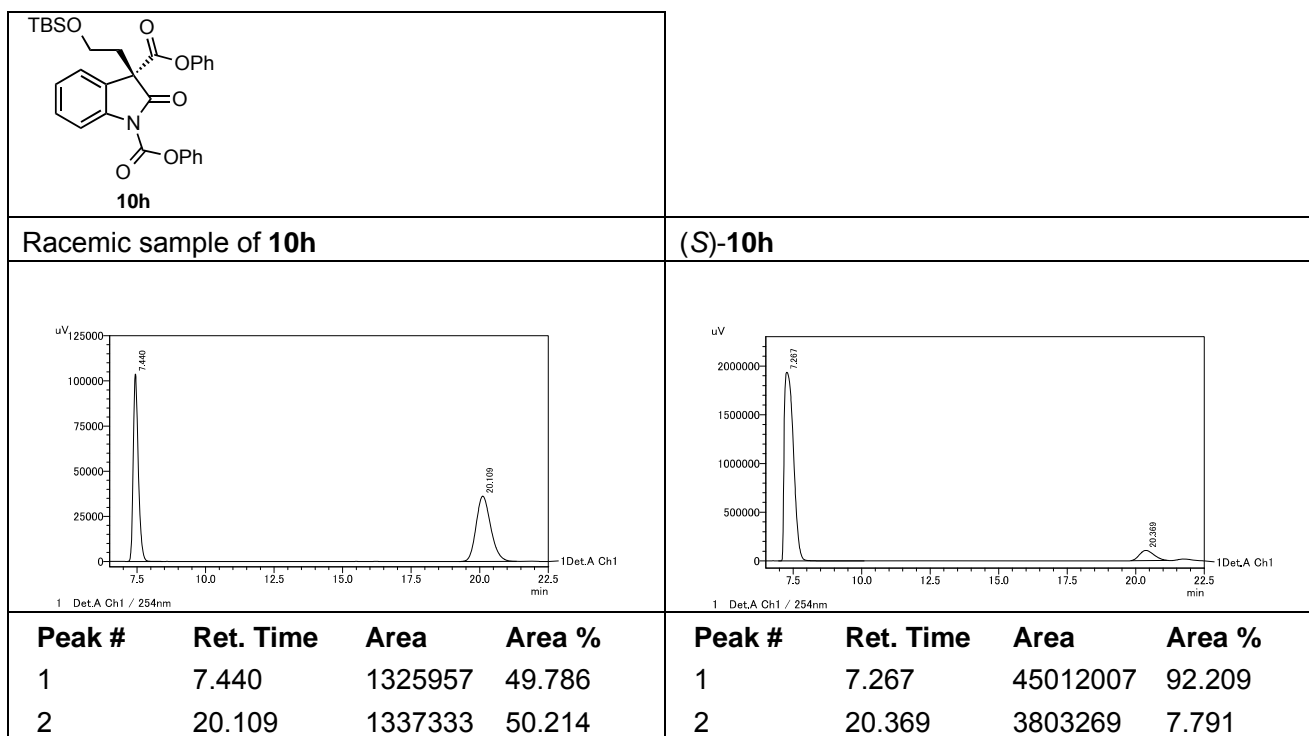

**Supplementary Figure 61.** HPLC spectra for product **10h** of Steglich rearrangement with catalyst **1j** (see Figure 5)

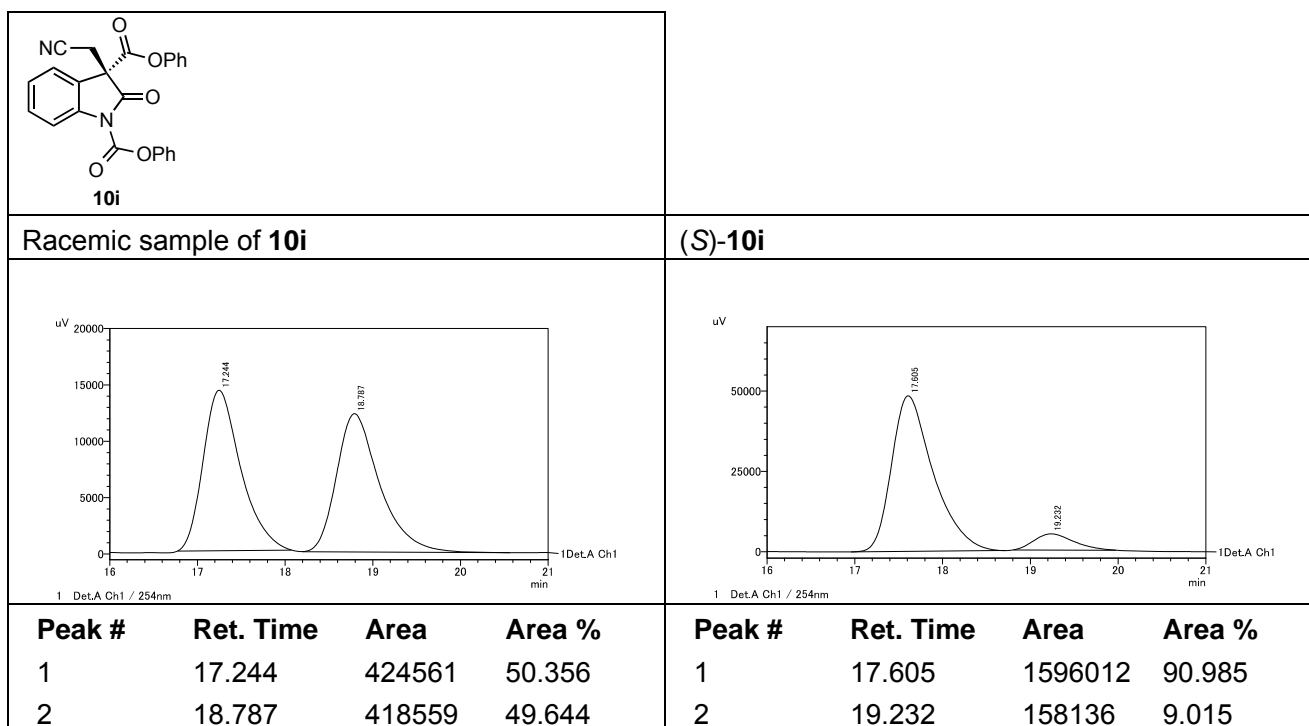

**Supplementary Figure 62.** HPLC spectra for product **10i** of Steglich rearrangement with catalyst **1j** (see Figure 5)

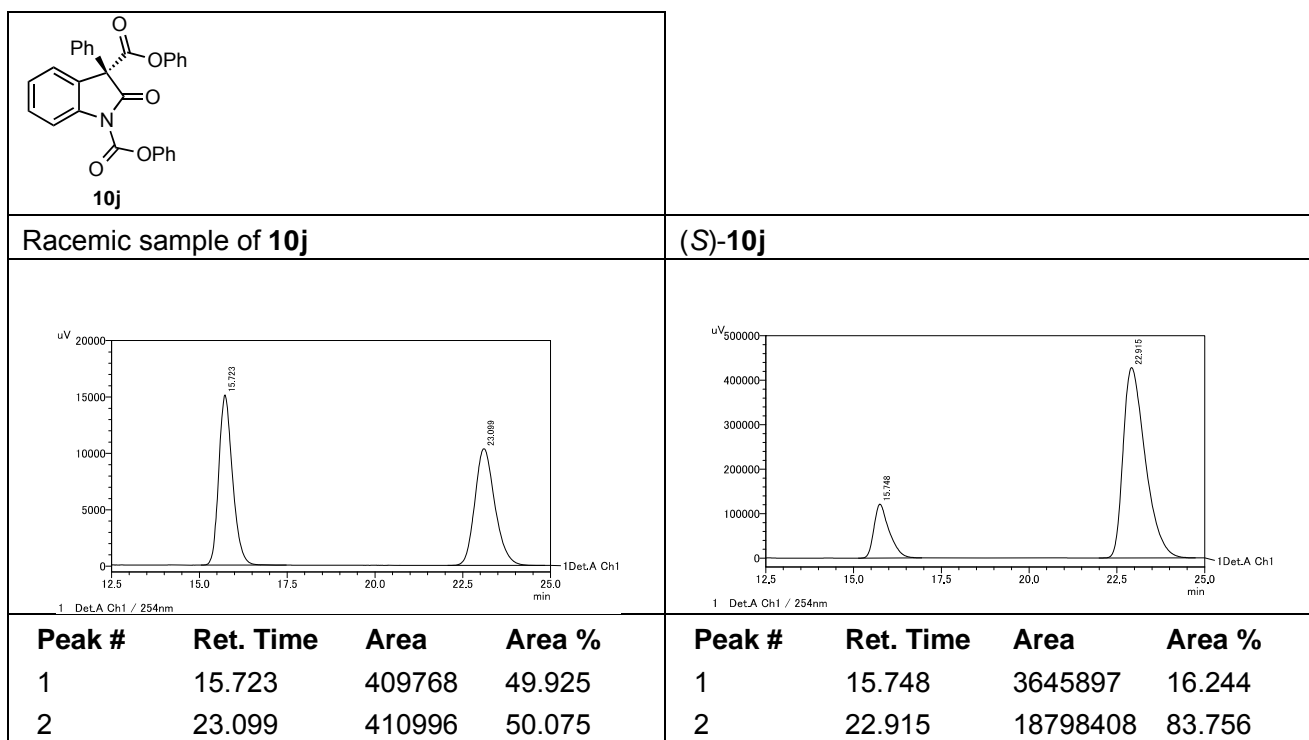

**Supplementary Figure 63.** HPLC spectra for product **10j** of Steglich rearrangement with catalyst **1j** (see Figure 5)

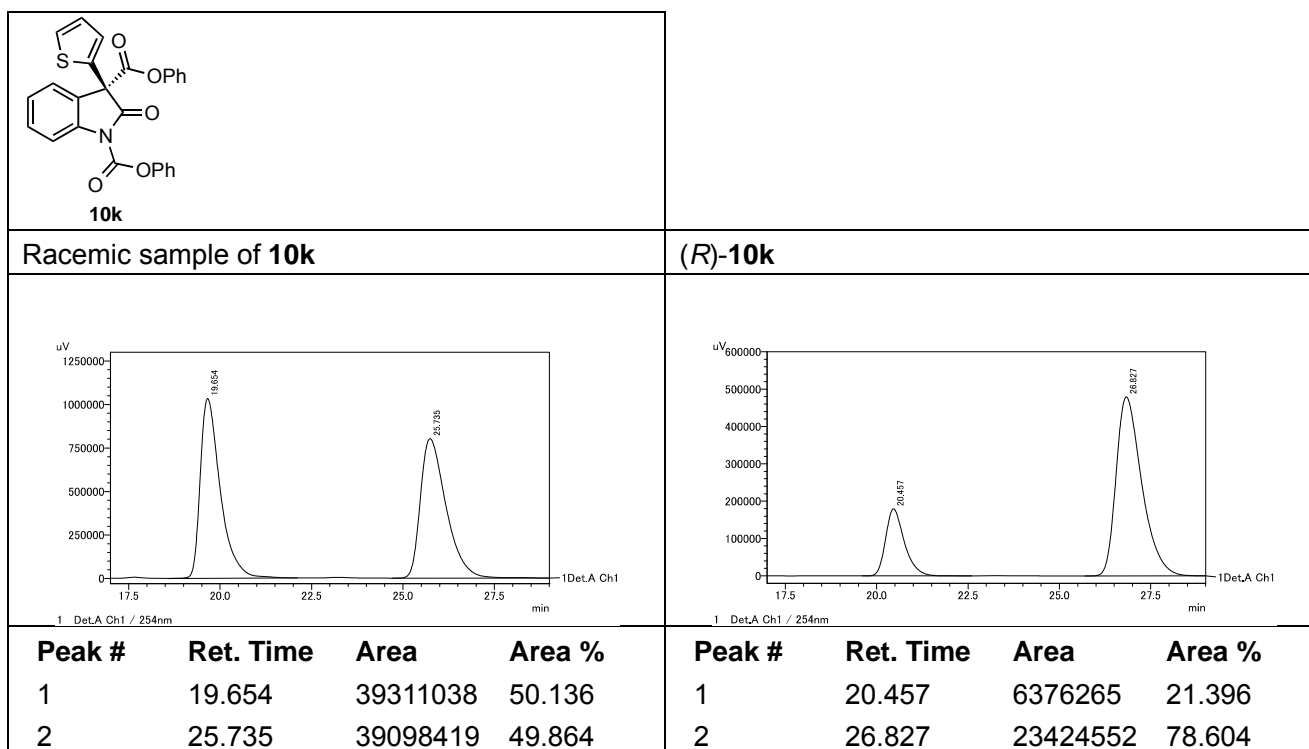

**Supplementary Figure 64.** HPLC spectra for product **10k** of Steglich rearrangement with catalyst **1j** (see Figure 5)

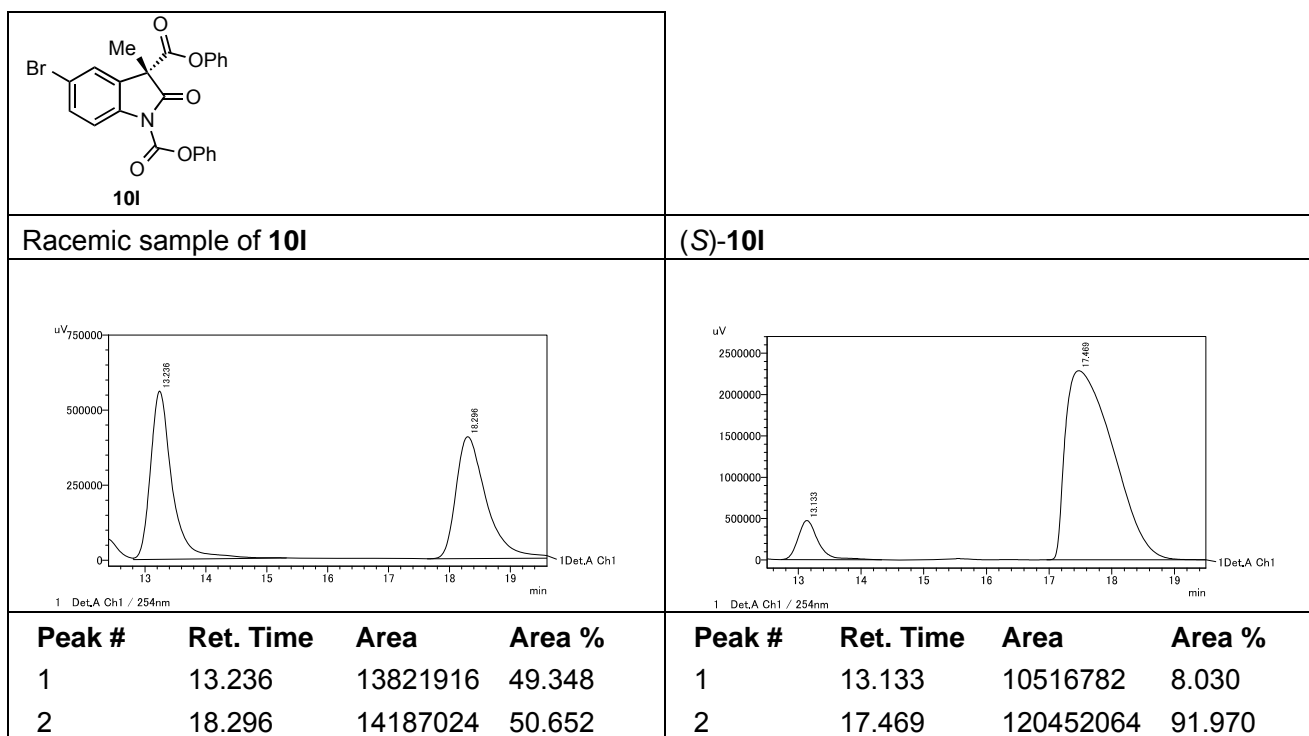

**Supplementary Figure 65.** HPLC spectra for product **10l** of Steglich rearrangement with catalyst **1j** (see Figure 5)

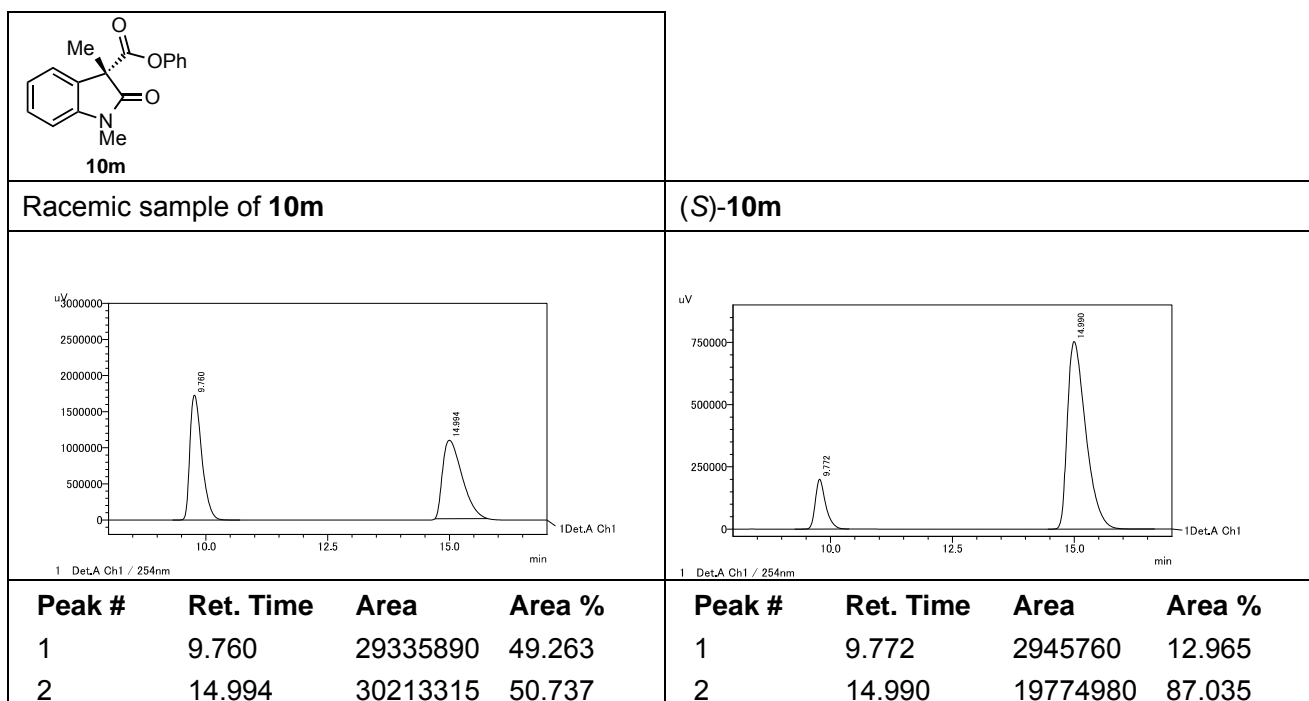

**Supplementary Figure 66.** HPLC spectra for product **10m** of Steglich rearrangement with catalyst **1j** (see Figure 5)



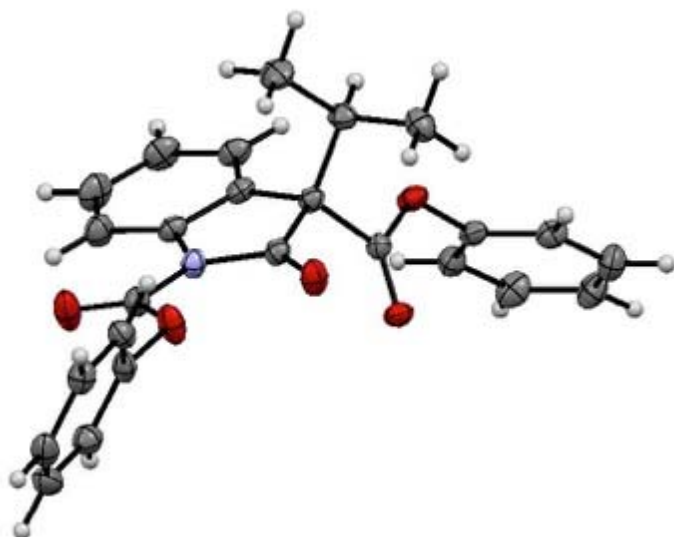

**Supplementary Figure 67.** X-ray structure of product **10c**

| Racemic sample of 10a, 10n, 10a' and 10n' |                  |             |               | (S)- 10a, 10n, 10a' and 10n' |                  |             |               |
|-------------------------------------------|------------------|-------------|---------------|------------------------------|------------------|-------------|---------------|
|                                           |                  |             |               |                              |                  |             |               |
| <b>Peak #</b>                             | <b>Ret. Time</b> | <b>Area</b> | <b>Area %</b> | <b>Peak #</b>                | <b>Ret. Time</b> | <b>Area</b> | <b>Area %</b> |
| 1                                         | 12.849           | 6776862     | 13.088        | 1                            | 12.882           | 260894      | 0.779         |
| 2                                         | 19.312           | 6773022     | 13.081        | 2                            | 19.371           | 6386553     | 19.065        |
| 3                                         | 21.465           | 5711902     | 11.032        | 3                            | 21.539           | 199224      | 0.595         |
| 4                                         | 24.590           | 6483558     | 12.522        | 4                            | 24.624           | 212607      | 0.635         |
| 5                                         | 31.523           | 6452442     | 12.462        | 5                            | 31.602           | 6433427     | 19.205        |
| 6                                         | 37.448           | 5710356     | 11.029        | 6                            | 37.546           | 5450315     | 16.270        |
| 7                                         | 42.041           | 6934043     | 13.392        | 7                            | 42.176           | 514876      | 1.537         |
| 8                                         | 62.171           | 6935636     | 13.395        | 8                            | 62.164           | 14040320    | 41.914        |
| Racemic sample of 10a                     |                  |             |               | (S)-10a                      |                  |             |               |
|                                           |                  |             |               |                              |                  |             |               |
| <b>Peak #</b>                             | <b>Ret. Time</b> | <b>Area</b> | <b>Area %</b> | <b>Peak #</b>                | <b>Ret. Time</b> | <b>Area</b> | <b>Area %</b> |
| 1                                         | 12.849           | 6776862     | 50.014        | 1                            | 12.882           | 251216      | 3.780         |
| 2                                         | 19.312           | 6773022     | 49.986        | 2                            | 19.371           | 6394711     | 96.220        |
| Racemic sample of 10a' or 10n'            |                  |             |               | (S)-10a' or 10n'             |                  |             |               |
|                                           |                  |             |               |                              |                  |             |               |
| <b>Peak #</b>                             | <b>Ret. Time</b> | <b>Area</b> | <b>Area %</b> | <b>Peak #</b>                | <b>Ret. Time</b> | <b>Area</b> | <b>Area %</b> |
| 1                                         | 21.465           | 5711902     | 50.007        | 1                            | 21.539           | 197158      | 3.500         |
| 2                                         | 37.448           | 5710356     | 49.993        | 2                            | 37.546           | 5436404     | 96.500        |
| Racemic sample of 10a' or 10n'            |                  |             |               | (S)-10a' or 10n'             |                  |             |               |
|                                           |                  |             |               |                              |                  |             |               |
| <b>Peak #</b>                             | <b>Ret. Time</b> | <b>Area</b> | <b>Area %</b> | <b>Peak #</b>                | <b>Ret. Time</b> | <b>Area</b> | <b>Area %</b> |
| 1                                         | 24.590           | 6483558     | 50.120        | 1                            | 24.624           | 208941      | 3.141         |

|                              |                  |             |               |                |                  |             |               |
|------------------------------|------------------|-------------|---------------|----------------|------------------|-------------|---------------|
| 2                            | 31.523           | 6452442     | 49.880        | 2              | 31.602           | 6442366     | 96.859        |
| Racemic sample of <b>10n</b> |                  |             |               | <b>(S)-10n</b> |                  |             |               |
|                              |                  |             |               |                |                  |             |               |
| <b>Peak #</b>                | <b>Ret. Time</b> | <b>Area</b> | <b>Area %</b> | <b>Peak #</b>  | <b>Ret. Time</b> | <b>Area</b> | <b>Area %</b> |
| 1                            | 42.041           | 6934043     | 49.994        | 1              | 42.176           | 435525      | 3.011         |
| 2                            | 62.171           | 6935636     | 50.006        | 2              | 62.164           | 14027941    | 96.989        |

**Supplementary Figure 68.** HPLC spectra for cross over products **10a**, **10n**, **10a'** and **10n'** in Fig. 6

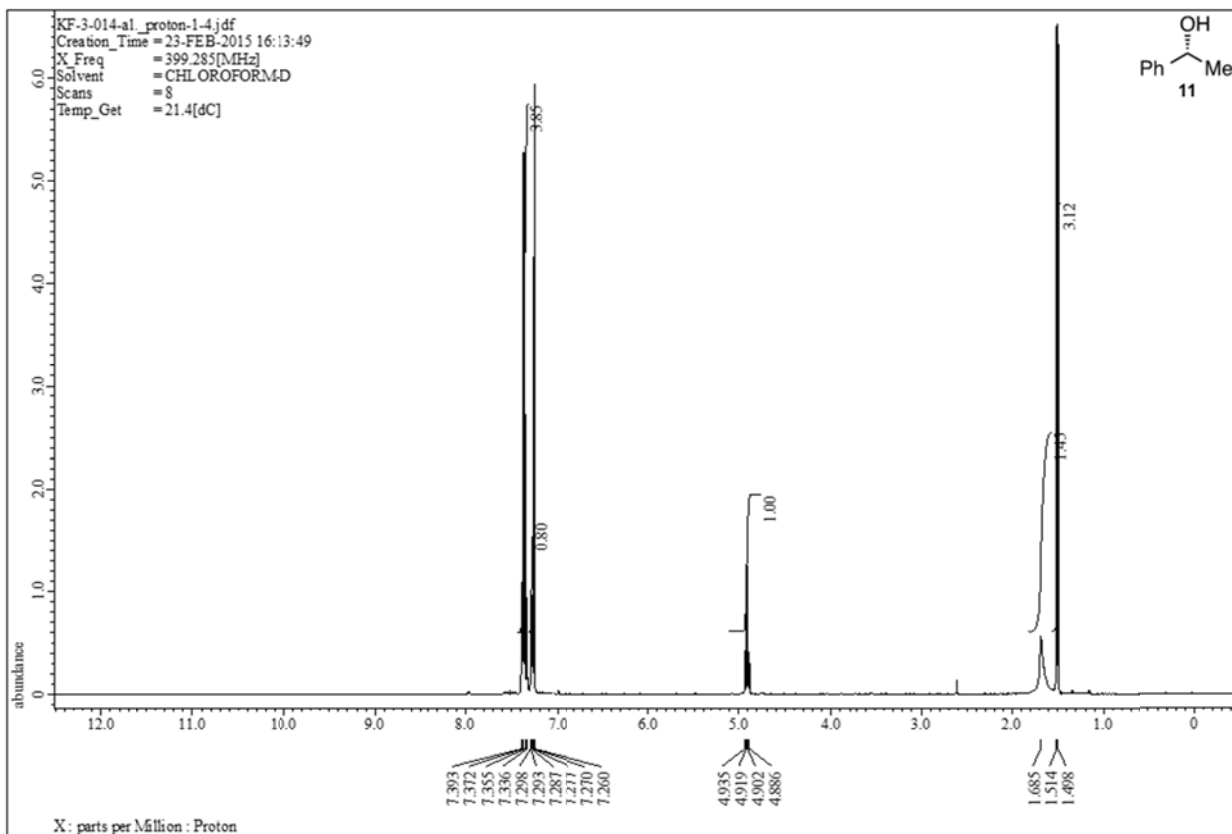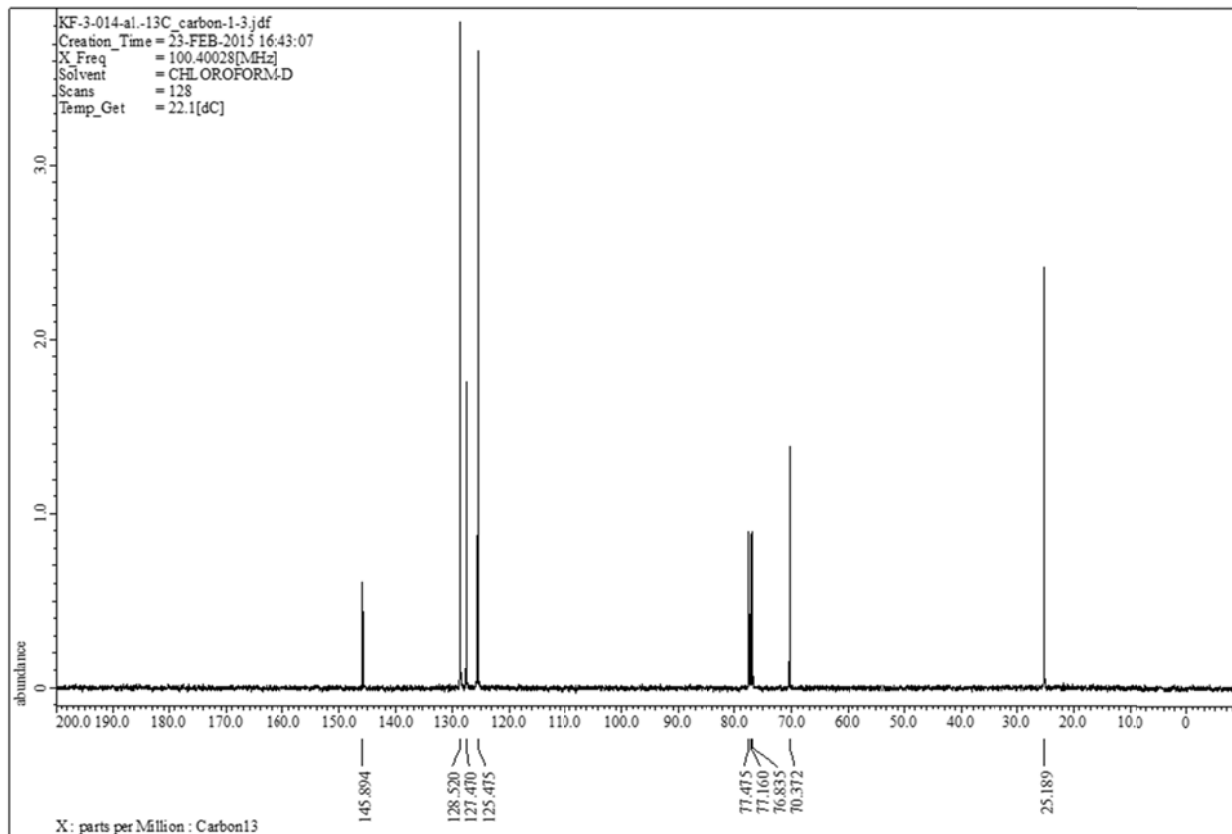

Supplementary Figure 69.  $^1\text{H}$  and  $^{13}\text{C}$ -NMR spectra for product 11

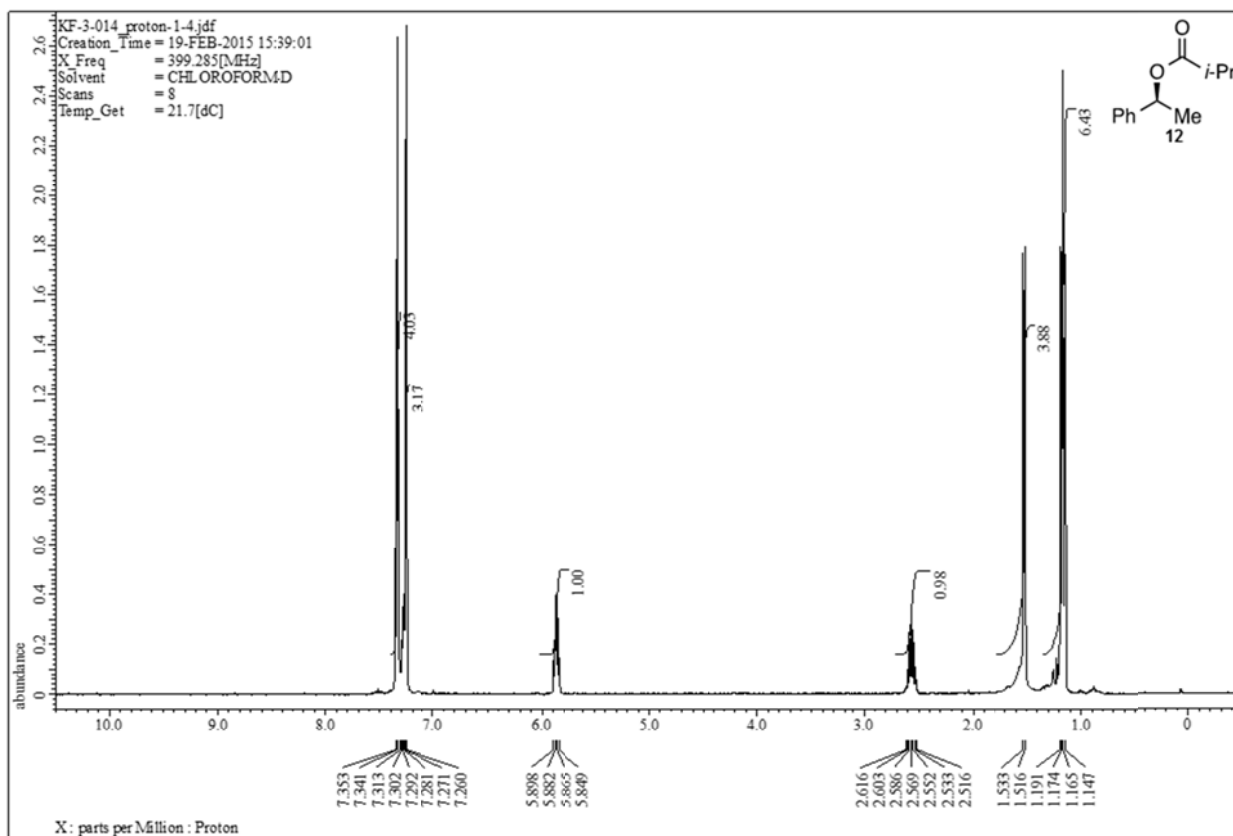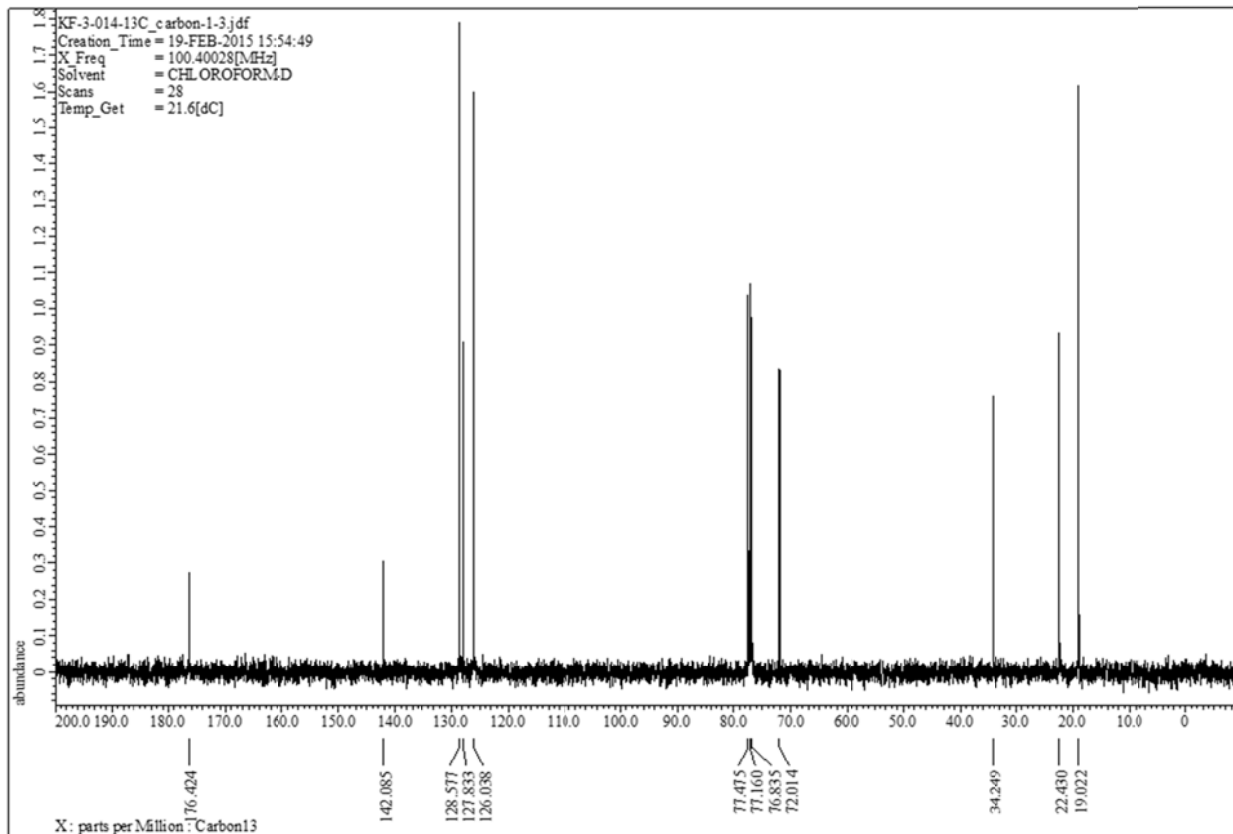

Supplementary Figure 70.  $^1\text{H}$  and  $^{13}\text{C}$ -NMR spectra for product 12

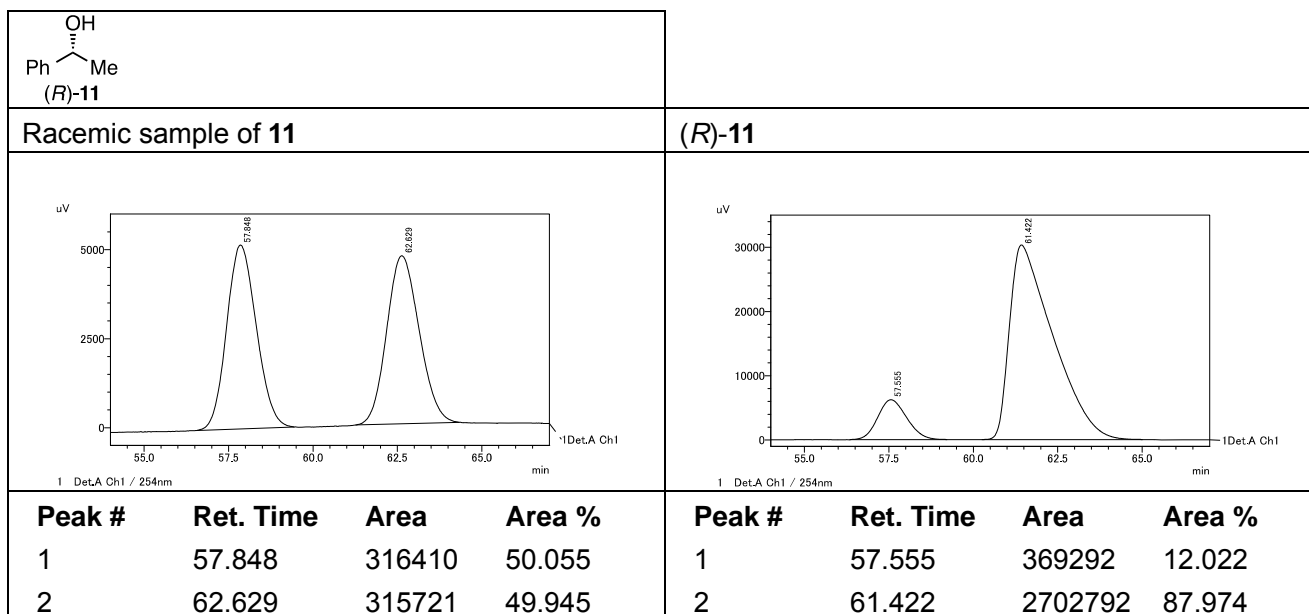

**Supplementary Figure 71.** HPLC spectra for substrate **11** of kinetic resolution of secondary carbinol with catalyst **1j** (see Figure 9a)

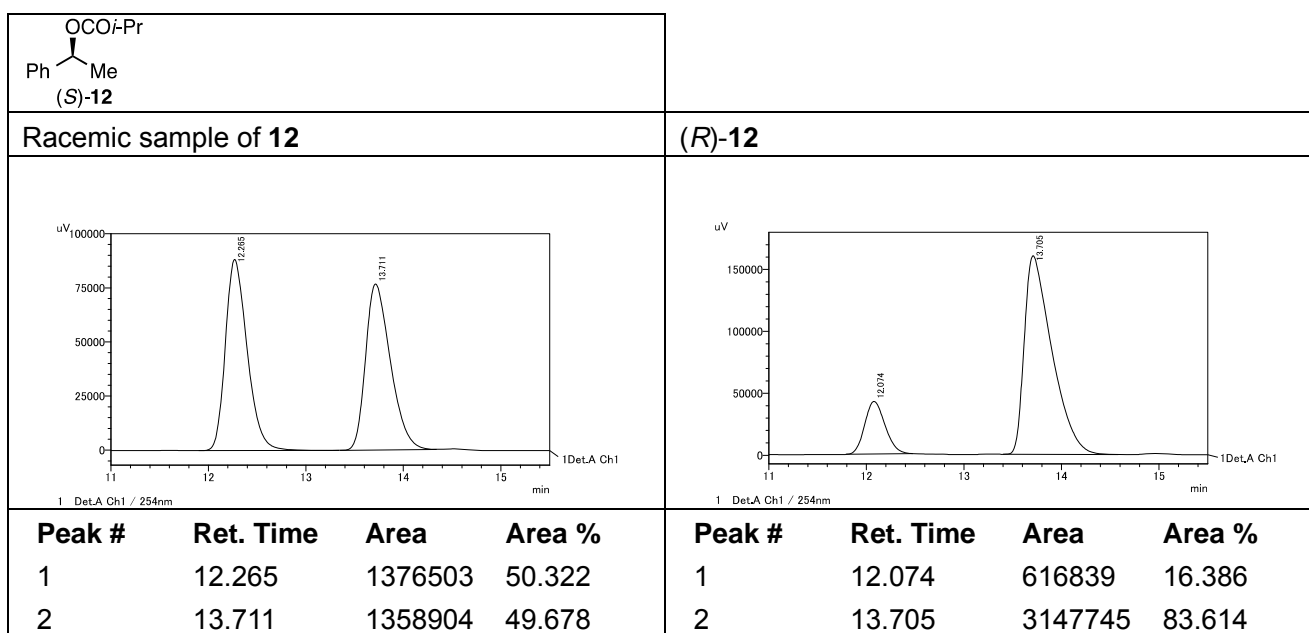

**Supplementary Figure 72.** HPLC spectra for product **12** of kinetic resolution of secondary carbinol with catalyst **1j** (see Figure 9a)

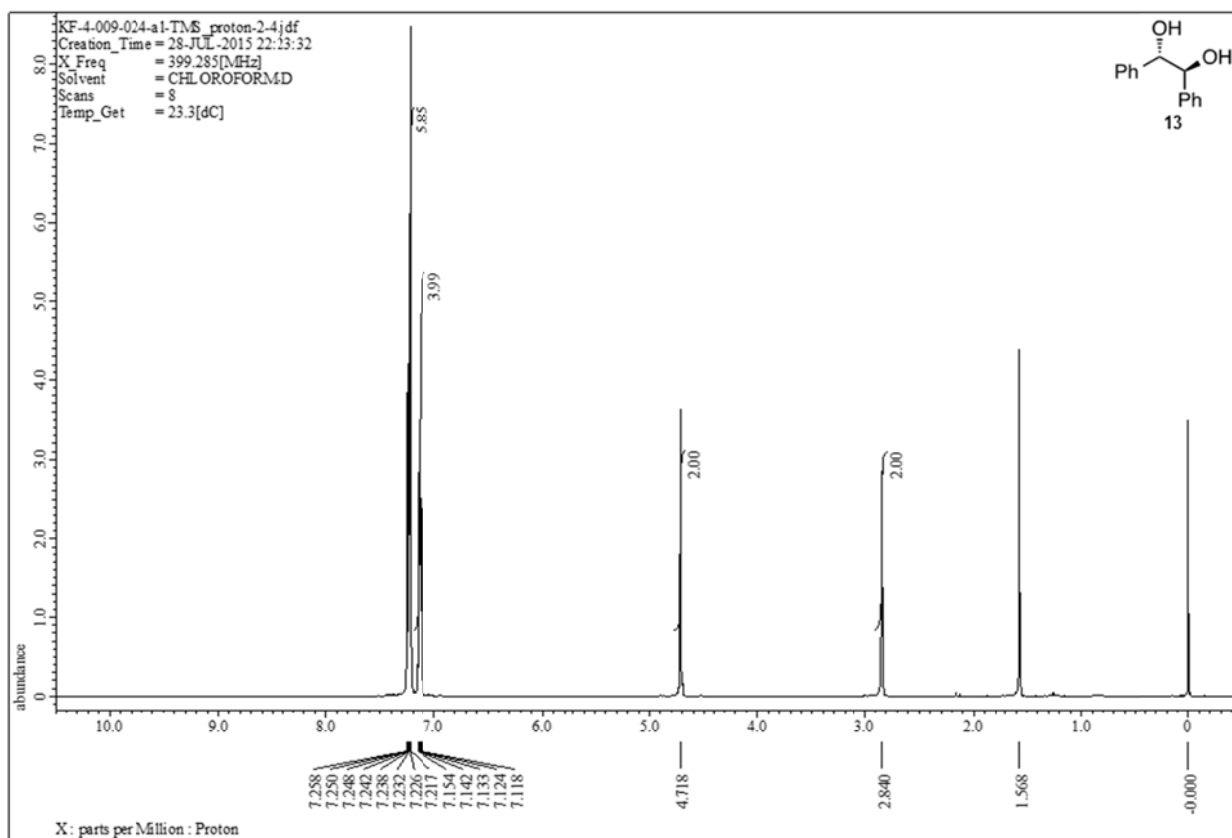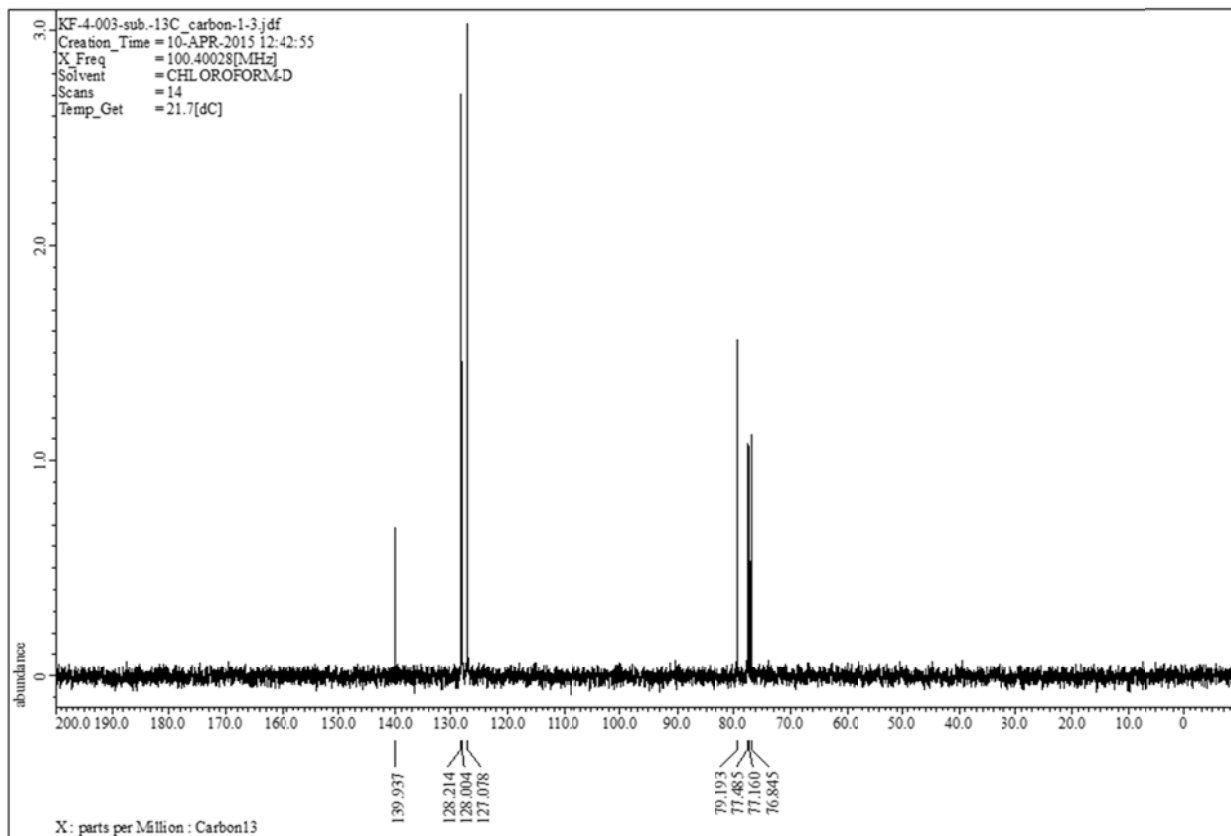

Supplementary Figure 73.  $^1\text{H}$  and  $^{13}\text{C}$ -NMR spectra for product 13

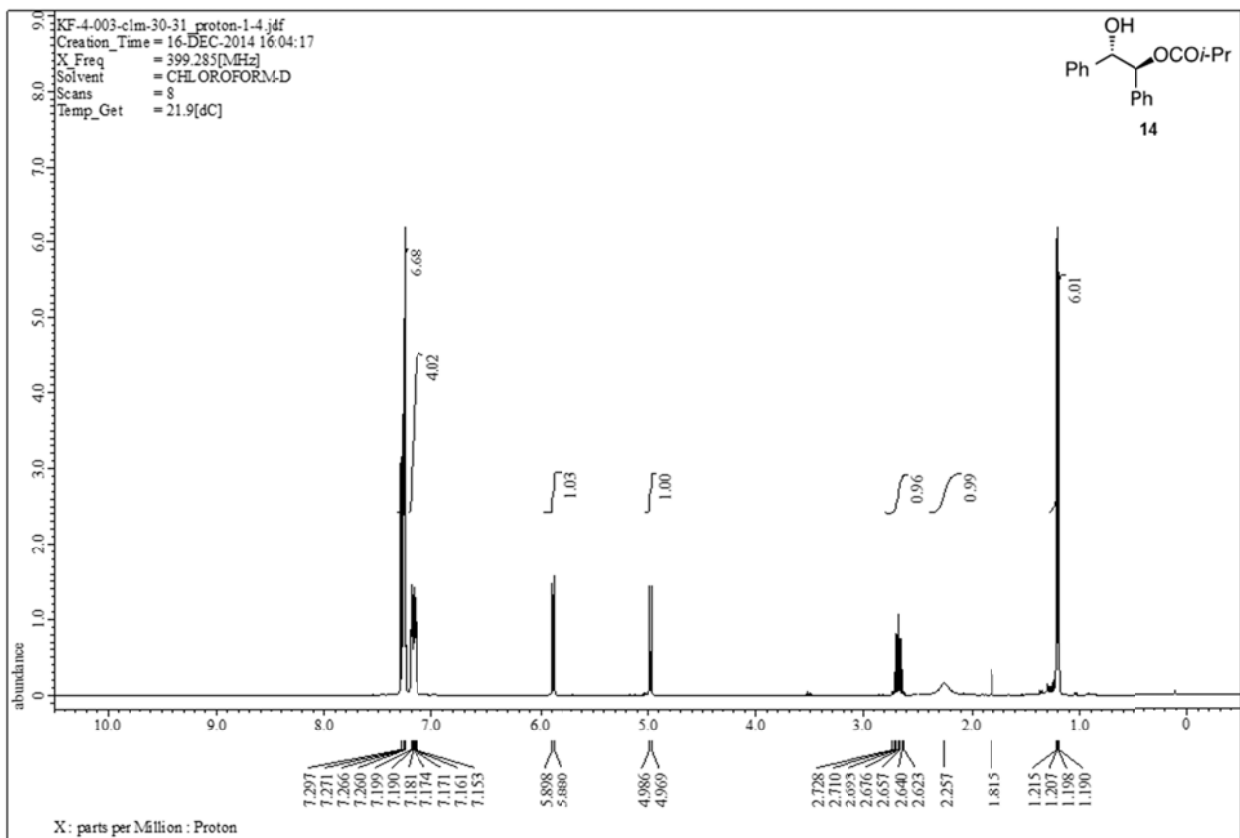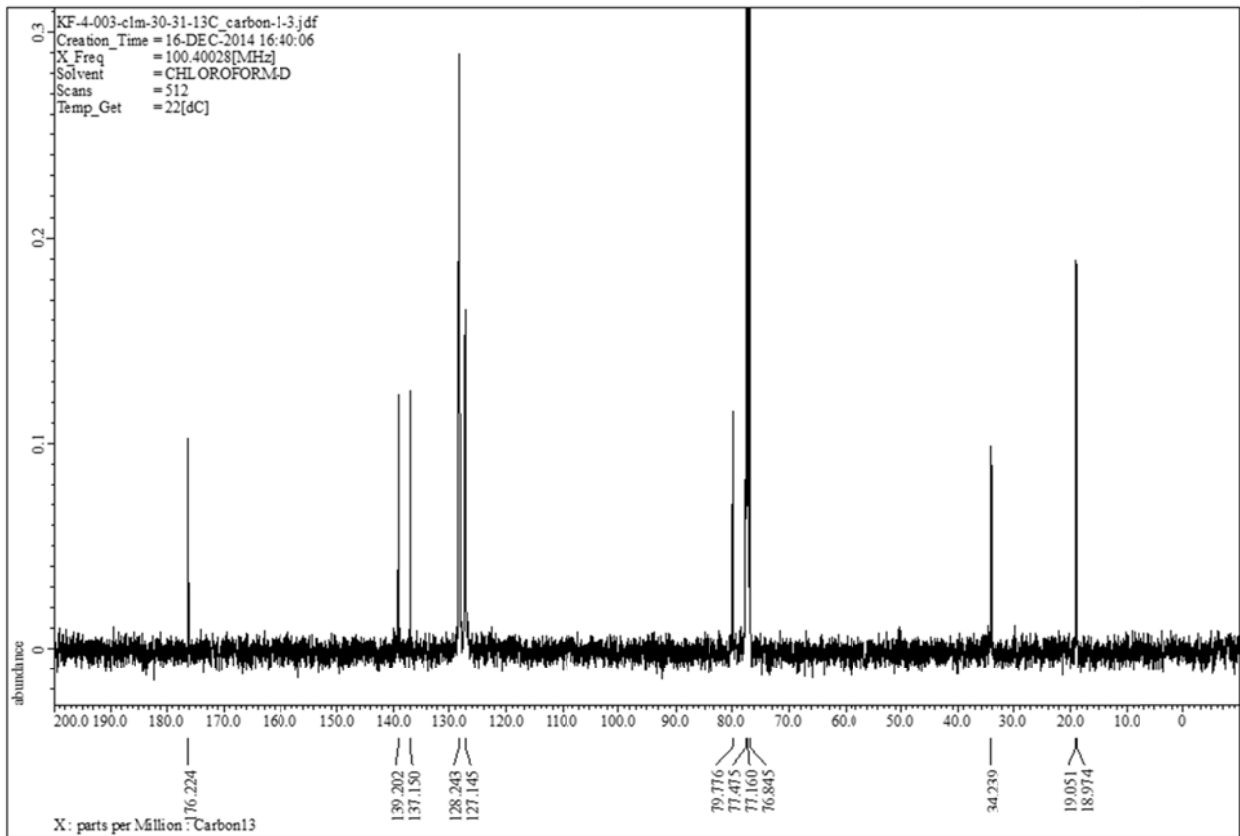

Supplementary Figure 74.  $^1\text{H}$  and  $^{13}\text{C}$ -NMR spectra for product 14



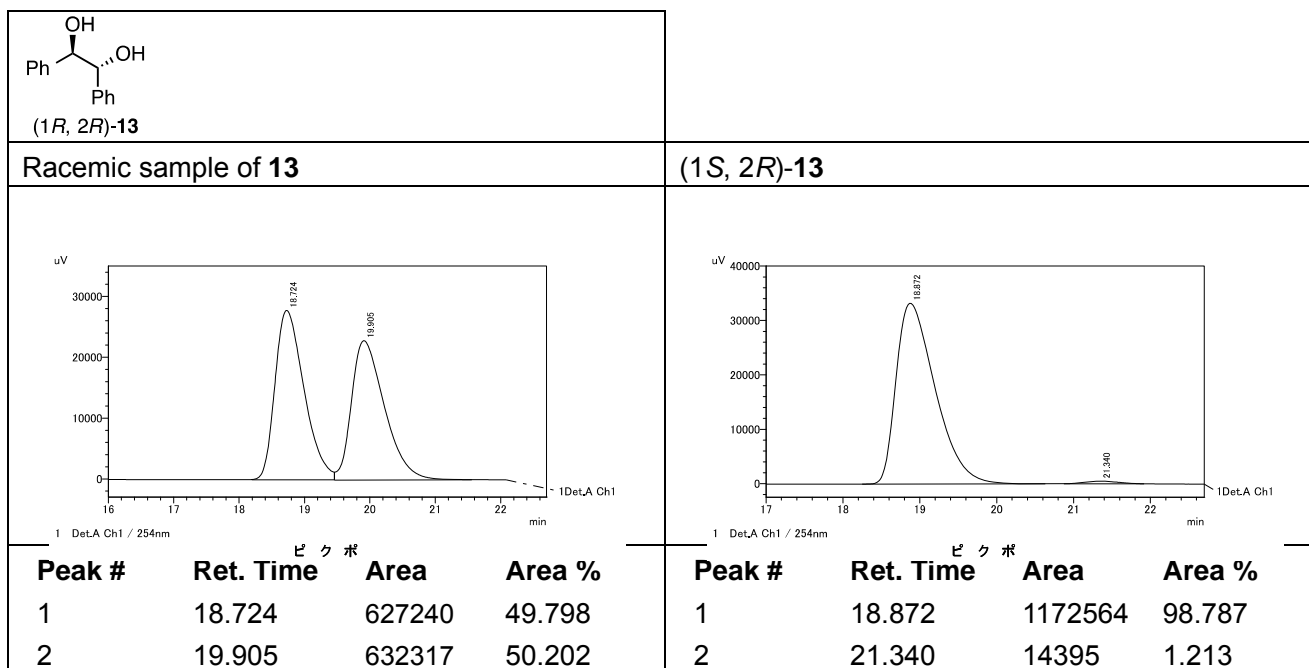

**Supplementary Figure 75.** HPLC spectra for substrate **13** of kinetic resolution of racemic acyclic 1,2-diol with catalyst **1g** (see Figure 9b)

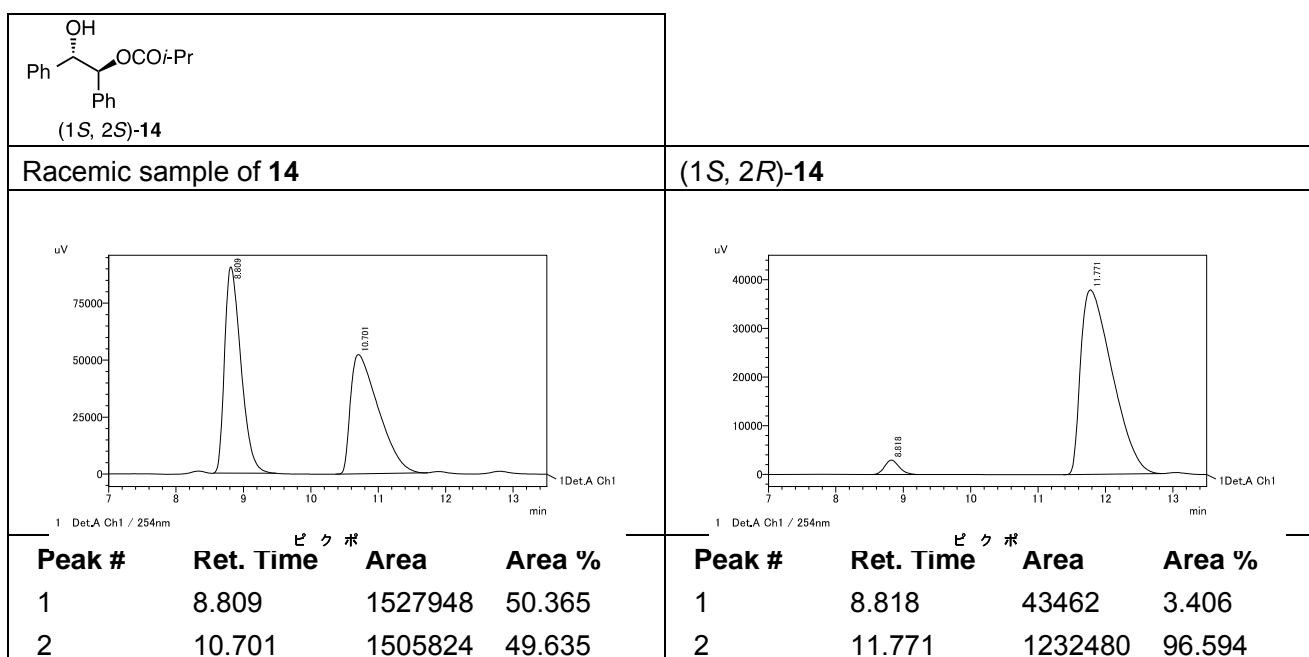

**Supplementary Figure 76.** HPLC spectra for product **14** of kinetic resolution of racemic acyclic 1,2-diol with catalyst **1g** (see Figure 9b)

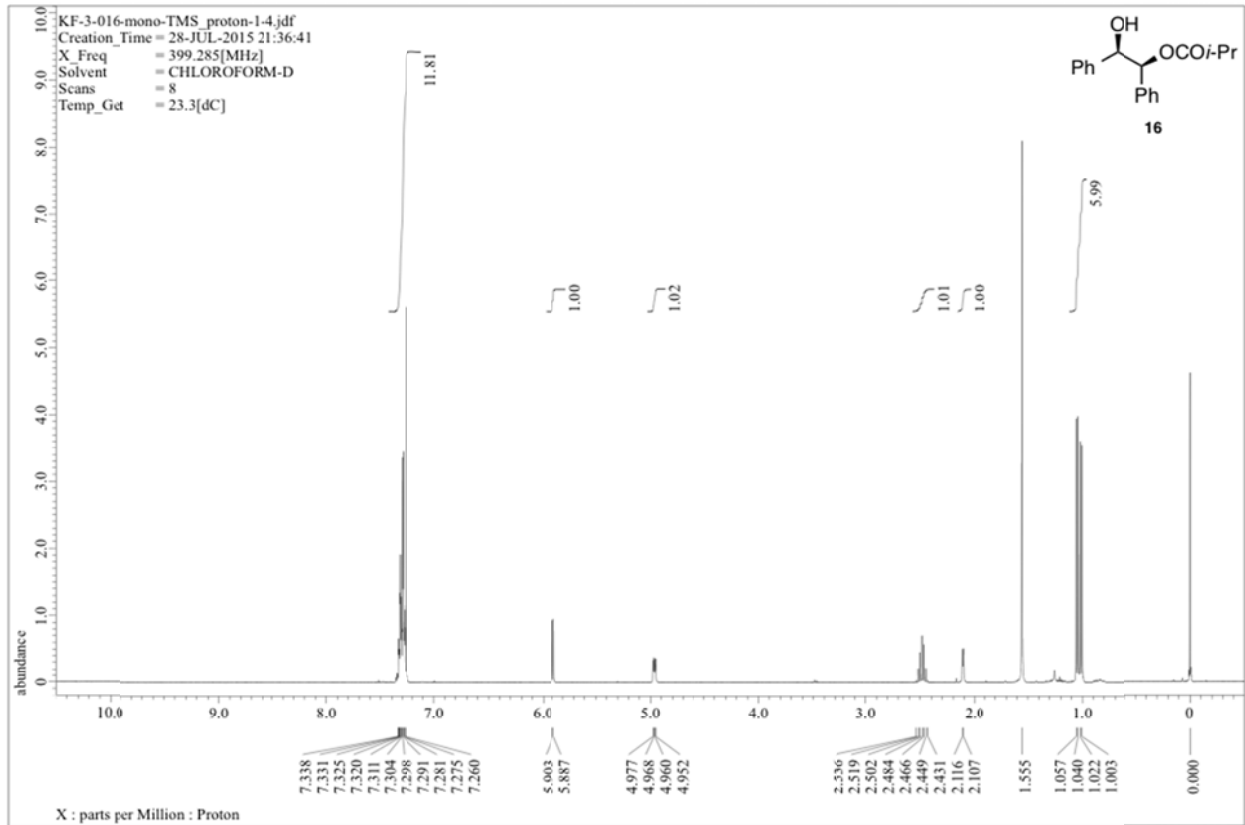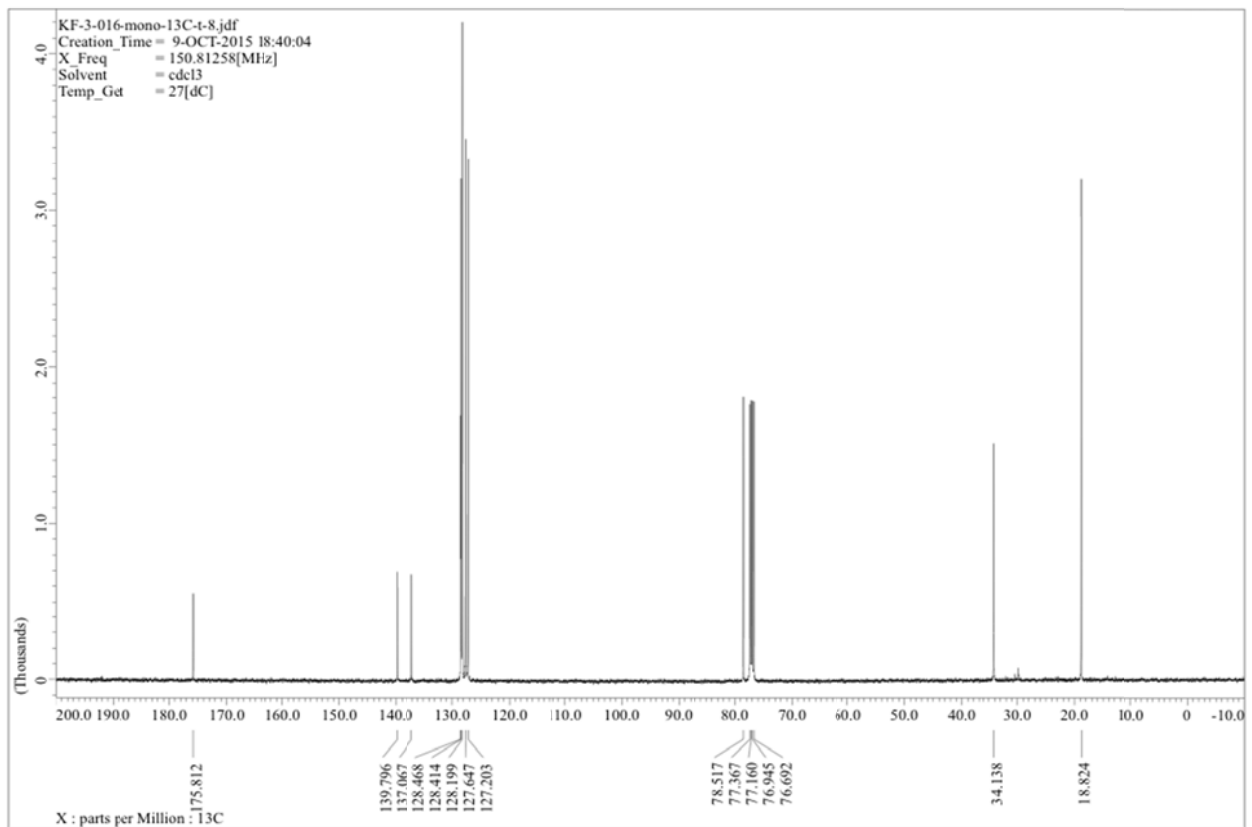

Supplementary Figure 77.  $^1\text{H}$  and  $^{13}\text{C}$ -NMR spectra for product 16

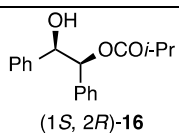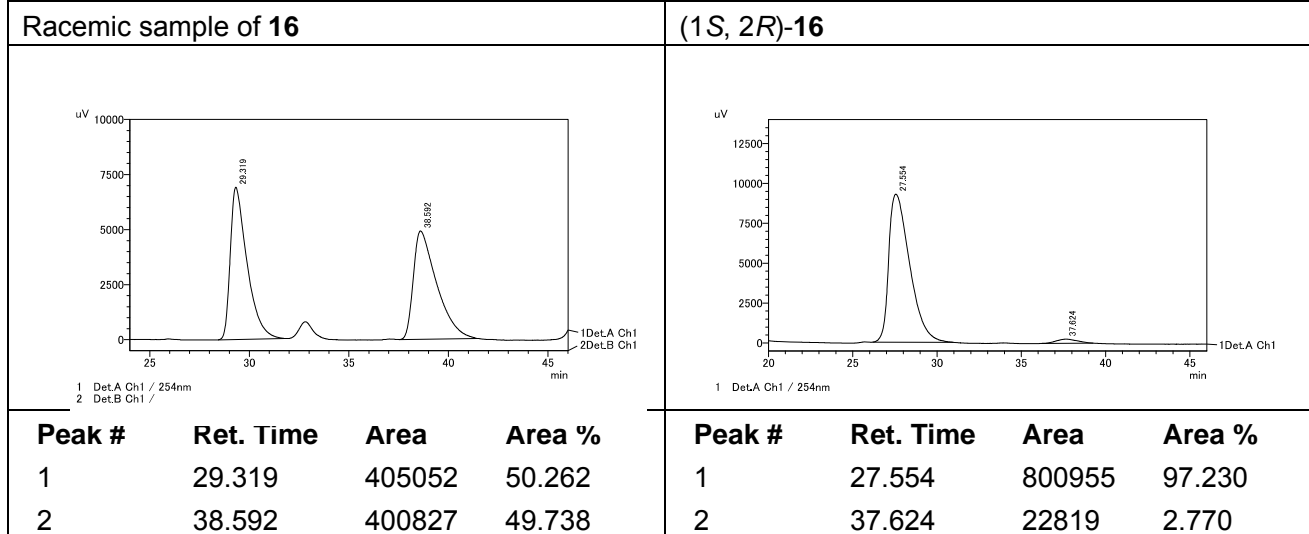

**Supplementary Figure 78.** HPLC spectra for product **16** of kinetic resolution of desymmetrization of acyclic *meso*-1,2-diol with catalyst **1g** (see Figure 9c)

**Supplementary Table 1.** The screening of the solvent for the explore of optimal reaction conditions

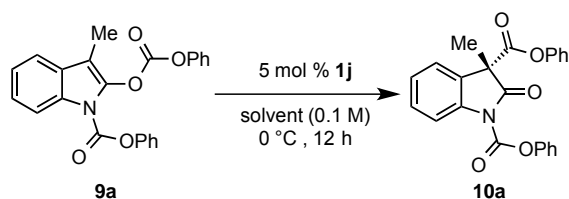

| Entry | Solvent                         | Conv (%) <sup>b</sup> | er <sup>c</sup> |
|-------|---------------------------------|-----------------------|-----------------|
| 1     | THF                             | >98                   | 98:2            |
| 2     | Et <sub>2</sub> O               | >98                   | 98:2            |
| 3     | CPME                            | >98                   | 97:3            |
| 4     | acetone                         | >98                   | 95:5            |
| 5     | EtOAc                           | >98                   | 98:2            |
| 6     | CH <sub>2</sub> Cl <sub>2</sub> | >98                   | 97:3            |
| 7     | toluene                         | >98                   | 98:2            |
| 8     | hexane                          | 74                    | 93:7            |
| 9     | <i>t</i> -amyl alcohol          | 88                    | 64:36           |

<sup>a</sup>Reactions were performed on 0.10 mmol scale under Ar atmosphere. <sup>b</sup>Conversions were determined by <sup>1</sup>H NMR analysis of unpurified reaction mixture. <sup>c</sup>Enantioselectivities were determined by HPLC analysis.

We conducted several screening in order to explore the optimal reaction conditions. After screening of catalyst (Figure 4a), we carried out screening of solvent (Supplementary Table 1). Various solvents could be used in these reaction to afford the product **10a** with complete conversions (>98% conv) and a high enantioselectivity (>95:5 er, entries 1–7) except in the case of hexane and *t*-amyl alcohol (entries 8 and 9). In addition, the *t*-amyl alcohol significantly decreased the enantioselectivity (64:36 er) which might be stem largely from inhibition of hydrogen bonding network between the catalyst **1j** and substrate **9a** in the transition state. Since the highest enantiomeric ratio (98:2 er) was achieved in the reaction in THF (entry 1), we selected THF as an optimal solvent.

**Supplementary Table 2.** The screening of the reaction temperature for the explore of optimal reaction conditions

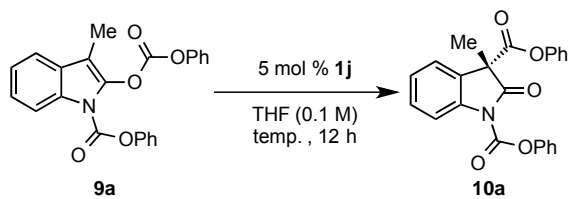

| Entry | Temp. (°C) | Conv (%) <sup>b</sup> | er <sup>c</sup> |
|-------|------------|-----------------------|-----------------|
| 1     | 25         | >98                   | 96:4            |
| 2     | 0          | >98                   | 97:3            |
| 3     | -20        | >98                   | 98:2            |
| 4     | -40        | >98                   | 98:2            |
| 5     | -60        | 97                    | 99:1            |
| 6     | -78        | 39                    | 99:1            |

<sup>a-c</sup>See footnotes a-c of Supplementary Table 1.

Next, we also carried out the reaction at various temperature (Supplementary Table 2). The reaction at above -40 °C proceeded smoothly (>98% conv; >96:4 er; entries 1–4), whereas below -60 °C decreased the reaction conversions with maintaining almost the same enantiomeric ratios (99:1 er, entries 5 and 6). Interestingly, synthetically useful enantioselectivity (96:4 er) was also maintained even if the reaction at 25 °C. The catalyst **1j**, however, could be used and tolerated in various solvents and the reaction temperature to deliver the desired product **10a** with a high enantiomeric ratio. Judging from practicality and efficiency of the reaction, the reaction at -20 °C was determined to be optimal in the enantioselective Steglich rearrangement of oxindoles.

**Supplementary Table 3.** The screening of the migrating and *N*-protected group for the explore of optimal reaction conditions

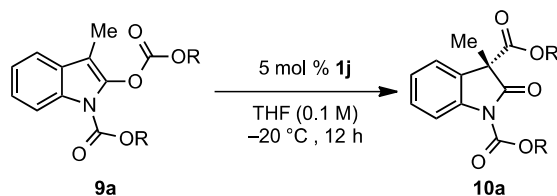

| entry | Product (R =)                                    | Conv (%) <sup>b</sup> | er <sup>c</sup> |
|-------|--------------------------------------------------|-----------------------|-----------------|
| 1     | <b>10a</b> : Ph                                  | >98                   | 98:2            |
| 2     | <b>10n</b> : 4-MeO-C <sub>6</sub> H <sub>4</sub> | >98                   | 98:2            |
| 3     | <b>10o</b> : 4-F-C <sub>6</sub> H <sub>4</sub>   | >98                   | 96:4            |
| 4     | <b>10p</b> : Bn                                  | 94                    | 92:8            |
| 5     | <b>10q</b> : Me                                  | 82                    | 95:5            |
| 6     | <b>10r</b> : <i>i</i> -Pr                        | <2                    | —               |

<sup>a-c</sup>See footnotes a-c of SupplementaryTable 1.

We carried out the reaction with different migrating group (Supplementary Table 3). As a result, phenyl carbonate gave the best enantioselectivity (98:2 er, entry 1). Therefore phenyl carbonate thought to be the

optimal migrating group, and was used for further screening. The procedures and the compounds data were shown in the later part of this supporting information.

**Supplementary Table 4.** The screening of the catalyst loading for the explore of optimal reaction conditions

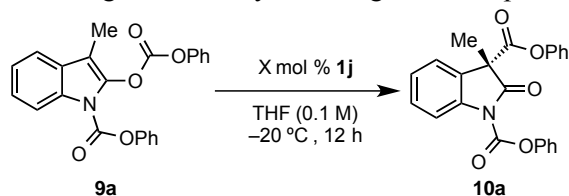

| Entry | X (mol %) | Conv (%) <sup>b</sup> | er <sup>c</sup> |
|-------|-----------|-----------------------|-----------------|
| 1     | 5         | >98                   | 98:2            |
| 2     | 3         | >98                   | 98:2            |
| 3     | 1         | >98                   | 98:2            |
| 4     | 0.5       | >98                   | 98:2            |
| 5     | 0.3       | 73                    | 98:2            |
| 6     | 0.1       | 15                    | 98:2            |

<sup>a-c</sup>See footnotes a-c of Supplementary Table 1.

We carried out the reaction in the presence of various catalyst loading (Supplementary Table 4). The reaction with at least 0.5 mol % of catalyst **1j** also proceeded smoothly, and the desired product **10a** was obtained in >98% conv with 98:2 er (entries 1–4). The use of less than 0.3 mol % of **1j** in the reaction decreased the conversion of **9a** after 12 h but still maintaining high enantioselectivities (entries 5 and 6).

**Supplementary Table 5.** The screening of the concentration of substrate for the explore of optimal reaction conditions

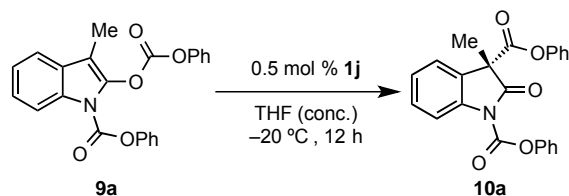

| Entry          | Conc. (M) | Conv (%) <sup>b</sup> | er <sup>c</sup> |
|----------------|-----------|-----------------------|-----------------|
| 1              | 0.1       | 71                    | 98:2            |
| 2              | 0.2       | 92                    | 98:2            |
| 3              | 0.4       | >98                   | 98:2            |
| 4 <sup>d</sup> | 0.4       | >98                   | 98:2            |

<sup>a-c</sup>See footnotes a-c of Supplementary Table 1.

<sup>d</sup>The reaction was carried out in THF (0.4 M) at -20 °C for 5 h.

Further tuning of the reaction conditions, concentration of substrate **9a** and reaction time, allowed to find the optimal reaction conditions to afford **10a** within 5 hours (>98% conv; 98:2 er; entry 4).

**Supplementary Table 6.** The time course analysis of the enantioselective Steglich rearrangement of oxindole catalyzed by **1j**, **1j'** and DMAP for kinetic experiments

catalyst **1j**

|                                     |       |       |      |      |      |     |     |
|-------------------------------------|-------|-------|------|------|------|-----|-----|
| time (h)                            | 0.33  | 0.67  | 1    | 2    | 3    | 4   | 5   |
| conversion (%)                      | 34.8  | 55.2  | 69.0 | 91.4 | 97.5 | 100 | 100 |
| ln(1-conv/100)                      | 0.428 | 0.803 | 1.17 | 2.45 | 3.69 | –   | –   |
| kinetic constant ( $k$ , $h^{-1}$ ) | 1.22  |       |      |      |      |     |     |

DMAP

|                                     |                       |        |        |        |        |        |        |
|-------------------------------------|-----------------------|--------|--------|--------|--------|--------|--------|
| time (h)                            | 0.33                  | 0.67   | 1      | 2      | 3      | 4      | 5      |
| conversion (%)                      | 0                     | 1.7    | 2.2    | 4.4    | 6.8    | 9.4    | 13.5   |
| ln(1-conv/100)                      | 0                     | 0.0171 | 0.0222 | 0.0450 | 0.0704 | 0.0987 | 0.1450 |
| kinetic constant ( $k$ , $h^{-1}$ ) | $7.47 \times 10^{-2}$ |        |        |        |        |        |        |

catalyst **1j'**

|                                     |                       |        |        |       |       |       |       |
|-------------------------------------|-----------------------|--------|--------|-------|-------|-------|-------|
| time (h)                            | 0.33                  | 0.67   | 1      | 2     | 3     | 4     | 5     |
| conversion (%)                      | 2.3                   | 4.7    | 6.4    | 12.4  | 19.5  | 24.3  | 33.2  |
| ln(1-conv/100)                      | 0.0233                | 0.0481 | 0.0661 | 0.132 | 0.217 | 0.278 | 0.404 |
| kinetic constant ( $k$ , $h^{-1}$ ) | $2.62 \times 10^{-2}$ |        |        |       |       |       |       |

**Supplementary Table 7.** Cartesian coordinates of calculation results.

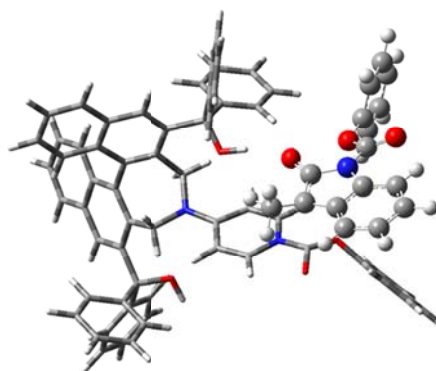

**TS-I**

Thermal Free Energies = -3620.205898 A.U.

| Center Number | Atomic Number | Atomic Type | Coordinates (Angstroms) |           |           |
|---------------|---------------|-------------|-------------------------|-----------|-----------|
|               |               |             | X                       | Y         | Z         |
| 1             | 7             | 0           | -1.720045               | 0.343494  | 0.023893  |
| 2             | 6             | 0           | -1.762828               | -0.955341 | 0.734540  |
| 3             | 6             | 0           | -2.918775               | 0.673857  | -0.771863 |
| 4             | 6             | 0           | -2.259812               | -2.047920 | -0.205066 |
| 5             | 6             | 0           | -4.182510               | 0.334396  | 0.001469  |
| 6             | 6             | 0           | -3.619018               | -2.036893 | -0.514847 |
| 7             | 6             | 0           | -4.155708               | -2.950315 | -1.486004 |
| 8             | 6             | 0           | -3.283962               | -3.938645 | -2.035405 |

|    |   |   |           |           |           |
|----|---|---|-----------|-----------|-----------|
| 9  | 6 | 0 | -1.918516 | -3.953589 | -1.652088 |
| 10 | 6 | 0 | -1.379395 | -3.023216 | -0.792368 |
| 11 | 6 | 0 | -5.007830 | 1.346704  | 0.600577  |
| 12 | 6 | 0 | -6.132037 | 0.954306  | 1.293644  |
| 13 | 6 | 0 | -6.456738 | -0.409811 | 1.503448  |
| 14 | 6 | 0 | -5.617977 | -1.422350 | 0.946270  |
| 15 | 6 | 0 | -4.500936 | -1.015569 | 0.138708  |
| 16 | 6 | 0 | -7.580393 | -0.782656 | 2.288919  |
| 17 | 6 | 0 | -7.851004 | -2.106587 | 2.546908  |
| 18 | 6 | 0 | -6.998030 | -3.111689 | 2.033126  |
| 19 | 6 | 0 | -5.911448 | -2.780229 | 1.253935  |
| 20 | 6 | 0 | -5.496453 | -2.899554 | -1.959542 |
| 21 | 6 | 0 | -5.954125 | -3.804341 | -2.892335 |
| 22 | 6 | 0 | -5.097866 | -4.807982 | -3.403042 |
| 23 | 6 | 0 | -3.788625 | -4.867886 | -2.984193 |
| 24 | 6 | 0 | -0.560336 | 1.019788  | -0.146034 |
| 25 | 6 | 0 | -0.351928 | 1.934196  | -1.219325 |
| 26 | 6 | 0 | 0.893280  | 2.455344  | -1.453329 |
| 27 | 6 | 0 | 1.762537  | 1.408683  | 0.456858  |
| 28 | 6 | 0 | 0.543309  | 0.860847  | 0.741510  |
| 29 | 7 | 0 | 1.955890  | 2.165065  | -0.659320 |
| 30 | 6 | 0 | 3.314162  | 2.639603  | -1.124288 |
| 31 | 8 | 0 | 3.329371  | 3.463748  | -2.026598 |
| 32 | 8 | 0 | 4.121341  | 2.684357  | 0.011533  |
| 33 | 6 | 0 | 4.859289  | 3.837286  | 0.287697  |
| 34 | 6 | 0 | 5.725709  | 4.421463  | -0.635805 |
| 35 | 6 | 0 | 4.746366  | 4.336108  | 1.585850  |
| 36 | 6 | 0 | 6.472228  | 5.533430  | -0.242822 |
| 37 | 6 | 0 | 5.508453  | 5.440586  | 1.967381  |
| 38 | 6 | 0 | 6.370498  | 6.046411  | 1.051967  |
| 39 | 1 | 0 | -0.770246 | -1.186045 | 1.094583  |
| 40 | 1 | 0 | -2.431170 | -0.868982 | 1.596617  |
| 41 | 1 | 0 | -2.889822 | 1.732144  | -0.997288 |
| 42 | 1 | 0 | -2.901067 | 0.116525  | -1.717229 |
| 43 | 1 | 0 | -1.281907 | -4.713554 | -2.090963 |
| 44 | 1 | 0 | -6.788450 | 1.699287  | 1.729213  |
| 45 | 1 | 0 | -8.213795 | 0.002004  | 2.695807  |
| 46 | 1 | 0 | -8.708264 | -2.382728 | 3.154705  |
| 47 | 1 | 0 | -7.199785 | -4.155244 | 2.258956  |
| 48 | 1 | 0 | -5.263736 | -3.561699 | 0.874345  |
| 49 | 1 | 0 | -6.163153 | -2.131502 | -1.584613 |
| 50 | 1 | 0 | -6.981167 | -3.743900 | -3.242335 |
| 51 | 1 | 0 | -5.472763 | -5.519244 | -4.133942 |
| 52 | 1 | 0 | -3.112796 | -5.619684 | -3.384597 |
| 53 | 1 | 0 | -1.140634 | 2.178699  | -1.917588 |
| 54 | 1 | 0 | 1.124187  | 3.106334  | -2.286015 |
| 55 | 1 | 0 | 2.625404  | 1.268956  | 1.089190  |
| 56 | 1 | 0 | 0.456293  | 0.267219  | 1.640908  |
| 57 | 1 | 0 | 5.812636  | 4.010720  | -1.632939 |
| 58 | 1 | 0 | 4.067119  | 3.853303  | 2.282003  |
| 59 | 1 | 0 | 7.148038  | 5.994398  | -0.958290 |
| 60 | 1 | 0 | 5.423366  | 5.826961  | 2.979701  |
| 61 | 1 | 0 | 6.962813  | 6.908298  | 1.346808  |
| 62 | 6 | 0 | -4.681925 | 2.850745  | 0.443288  |
| 63 | 6 | 0 | 0.137154  | -3.035051 | -0.470391 |
| 64 | 8 | 0 | 0.552649  | -1.698475 | -0.762849 |



|     |   |   |           |           |           |
|-----|---|---|-----------|-----------|-----------|
| 65  | 1 | 0 | 1.527952  | -1.595486 | -0.701515 |
| 66  | 6 | 0 | 0.377411  | -3.388870 | 1.018083  |
| 67  | 6 | 0 | 1.523617  | -2.918866 | 1.678430  |
| 68  | 6 | 0 | -0.507806 | -4.216239 | 1.723759  |
| 69  | 6 | 0 | 1.764021  | -3.259583 | 3.011034  |
| 70  | 1 | 0 | 2.241266  | -2.289515 | 1.160912  |
| 71  | 6 | 0 | -0.264447 | -4.558803 | 3.055965  |
| 72  | 1 | 0 | -1.397444 | -4.596465 | 1.231007  |
| 73  | 6 | 0 | 0.871521  | -4.078233 | 3.705912  |
| 74  | 1 | 0 | 2.656431  | -2.884726 | 3.504130  |
| 75  | 1 | 0 | -0.967794 | -5.199260 | 3.582396  |
| 76  | 1 | 0 | 1.062561  | -4.340273 | 4.743332  |
| 77  | 6 | 0 | 0.917475  | -4.009789 | -1.382912 |
| 78  | 6 | 0 | 1.291582  | -3.579895 | -2.664957 |
| 79  | 6 | 0 | 1.258925  | -5.310206 | -0.990762 |
| 80  | 6 | 0 | 1.991234  | -4.423194 | -3.526994 |
| 81  | 1 | 0 | 1.033582  | -2.574111 | -2.978058 |
| 82  | 6 | 0 | 1.957247  | -6.156991 | -1.855154 |
| 83  | 1 | 0 | 0.989703  | -5.666903 | -0.002120 |
| 84  | 6 | 0 | 2.328171  | -5.717407 | -3.125484 |
| 85  | 1 | 0 | 2.276827  | -4.065917 | -4.513118 |
| 86  | 1 | 0 | 2.217540  | -7.160026 | -1.526718 |
| 87  | 1 | 0 | 2.877686  | -6.374119 | -3.794835 |
| 88  | 8 | 0 | -3.297283 | 2.984057  | 0.836658  |
| 89  | 1 | 0 | -3.162785 | 3.906182  | 1.107999  |
| 90  | 6 | 0 | -5.513903 | 3.733685  | 1.399067  |
| 91  | 6 | 0 | -6.591767 | 4.520180  | 0.976062  |
| 92  | 6 | 0 | -5.163214 | 3.755068  | 2.760290  |
| 93  | 6 | 0 | -7.299264 | 5.308934  | 1.887287  |
| 94  | 1 | 0 | -6.881234 | 4.526303  | -0.068855 |
| 95  | 6 | 0 | -5.867277 | 4.543907  | 3.668242  |
| 96  | 1 | 0 | -4.335999 | 3.141379  | 3.103069  |
| 97  | 6 | 0 | -6.939787 | 5.326351  | 3.234147  |
| 98  | 1 | 0 | -8.129894 | 5.915510  | 1.536367  |
| 99  | 1 | 0 | -5.578447 | 4.545512  | 4.715969  |
| 100 | 1 | 0 | -7.488808 | 5.943490  | 3.940157  |
| 101 | 6 | 0 | -4.862266 | 3.298379  | -1.025182 |
| 102 | 6 | 0 | -4.013415 | 4.265644  | -1.579519 |
| 103 | 6 | 0 | -5.894211 | 2.783492  | -1.821819 |
| 104 | 6 | 0 | -4.188670 | 4.706224  | -2.892054 |
| 105 | 1 | 0 | -3.195477 | 4.667567  | -0.990127 |
| 106 | 6 | 0 | -6.074144 | 3.225968  | -3.133912 |
| 107 | 1 | 0 | -6.558716 | 2.026877  | -1.415963 |
| 108 | 6 | 0 | -5.221579 | 4.188772  | -3.675042 |
| 109 | 1 | 0 | -3.514675 | 5.453886  | -3.301833 |
| 110 | 1 | 0 | -6.878848 | 2.809934  | -3.734304 |
| 111 | 1 | 0 | -5.357386 | 4.529152  | -4.697845 |
| 112 | 6 | 0 | 6.231573  | 0.671518  | -1.354183 |
| 113 | 6 | 0 | 3.998807  | 0.773183  | -2.042728 |
| 114 | 6 | 0 | 4.087514  | -0.141146 | -0.926604 |
| 115 | 8 | 0 | 3.217014  | -0.866012 | -0.427390 |
| 116 | 6 | 0 | 2.963021  | 0.563573  | -3.115403 |
| 117 | 1 | 0 | 2.052858  | 0.117192  | -2.703517 |
| 118 | 1 | 0 | 3.335485  | -0.105839 | -3.902648 |
| 119 | 1 | 0 | 2.703025  | 1.516276  | -3.592914 |
| 120 | 6 | 0 | 5.370069  | 1.157270  | -2.358910 |

|     |   |   |          |           |           |
|-----|---|---|----------|-----------|-----------|
| 121 | 6 | 0 | 7.598155 | 0.922360  | -1.366490 |
| 122 | 6 | 0 | 5.897773 | 1.905066  | -3.412564 |
| 123 | 6 | 0 | 7.273410 | 2.159421  | -3.443544 |
| 124 | 1 | 0 | 7.695969 | 2.734479  | -4.263585 |
| 125 | 6 | 0 | 8.107814 | 1.678507  | -2.430884 |
| 126 | 1 | 0 | 9.174517 | 1.882690  | -2.466962 |
| 127 | 1 | 0 | 8.242576 | 0.534250  | -0.589758 |
| 128 | 1 | 0 | 5.245467 | 2.286308  | -4.192423 |
| 129 | 7 | 0 | 5.442785 | -0.070256 | -0.429172 |
| 130 | 6 | 0 | 5.950536 | -0.589437 | 0.750324  |
| 131 | 8 | 0 | 7.128943 | -0.725353 | 0.993852  |
| 132 | 8 | 0 | 4.949005 | -0.883808 | 1.631841  |
| 133 | 6 | 0 | 5.290356 | -1.517110 | 2.826422  |
| 134 | 6 | 0 | 4.893800 | -0.896407 | 4.008430  |
| 135 | 6 | 0 | 5.913704 | -2.764420 | 2.838239  |
| 136 | 6 | 0 | 5.124337 | -1.537497 | 5.227336  |
| 137 | 1 | 0 | 4.413514 | 0.075847  | 3.961206  |
| 138 | 6 | 0 | 6.144578 | -3.391492 | 4.062151  |
| 139 | 1 | 0 | 6.214588 | -3.228634 | 1.905940  |
| 140 | 6 | 0 | 5.750966 | -2.784418 | 5.257522  |
| 141 | 1 | 0 | 4.816506 | -1.056971 | 6.152002  |
| 142 | 1 | 0 | 6.632577 | -4.362064 | 4.079172  |
| 143 | 1 | 0 | 5.933011 | -3.280781 | 6.206525  |

**Supplementary Table 8.** Cartesian coordinates of calculation results.

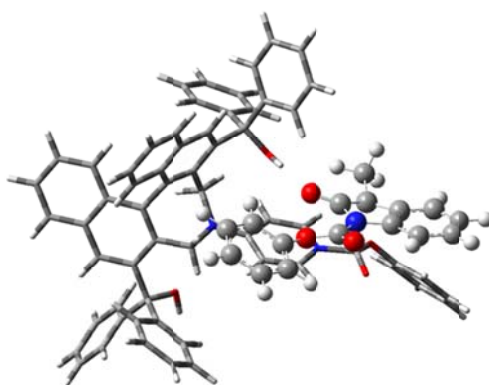

***TS-II***

Thermal Free Energies = -3620.200904 A.U.

| Center Number | Atomic Number | Atomic Type | Coordinates (Angstroms) |           |           |
|---------------|---------------|-------------|-------------------------|-----------|-----------|
|               |               |             | X                       | Y         | Z         |
| 1             | 7             | 0           | -1.220106               | -0.483495 | -0.893117 |
| 2             | 6             | 0           | -1.586879               | 0.750048  | -1.633615 |
| 3             | 6             | 0           | -2.094750               | -0.856158 | 0.238383  |
| 4             | 6             | 0           | -1.785909               | 1.893306  | -0.640459 |
| 5             | 6             | 0           | -3.551742               | -0.573070 | -0.070077 |
| 6             | 6             | 0           | -2.905229               | 1.816430  | 0.188160  |
| 7             | 6             | 0           | -3.052879               | 2.706800  | 1.305972  |
| 8             | 6             | 0           | -2.080579               | 3.736826  | 1.481839  |

|    |   |   |           |           |           |
|----|---|---|-----------|-----------|-----------|
| 9  | 6 | 0 | -1.022857 | 3.860020  | 0.544402  |
| 10 | 6 | 0 | -0.842046 | 2.974046  | -0.496043 |
| 11 | 6 | 0 | -4.501600 | -1.614776 | -0.344156 |
| 12 | 6 | 0 | -5.809612 | -1.260539 | -0.592602 |
| 13 | 6 | 0 | -6.232349 | 0.091662  | -0.653988 |
| 14 | 6 | 0 | -5.282965 | 1.133911  | -0.424205 |
| 15 | 6 | 0 | -3.937495 | 0.763614  | -0.083377 |
| 16 | 6 | 0 | -7.575806 | 0.424981  | -0.973942 |
| 17 | 6 | 0 | -7.966724 | 1.738694  | -1.092221 |
| 18 | 6 | 0 | -7.021078 | 2.773803  | -0.902305 |
| 19 | 6 | 0 | -5.714709 | 2.480934  | -0.577666 |
| 20 | 6 | 0 | -4.085566 | 2.583156  | 2.276656  |
| 21 | 6 | 0 | -4.159458 | 3.449003  | 3.346512  |
| 22 | 6 | 0 | -3.208982 | 4.485873  | 3.502092  |
| 23 | 6 | 0 | -2.189837 | 4.622793  | 2.586868  |
| 24 | 6 | 0 | 0.042083  | -0.986321 | -0.934006 |
| 25 | 6 | 0 | 0.610317  | -1.691378 | 0.160373  |
| 26 | 6 | 0 | 1.944893  | -2.008124 | 0.156977  |
| 27 | 6 | 0 | 2.196156  | -1.213074 | -2.028718 |
| 28 | 6 | 0 | 0.881168  | -0.842317 | -2.076836 |
| 29 | 7 | 0 | 2.741596  | -1.745174 | -0.903246 |
| 30 | 6 | 0 | 4.244709  | -1.934278 | -0.693130 |
| 31 | 8 | 0 | 4.567868  | -2.596883 | 0.281431  |
| 32 | 8 | 0 | 4.775579  | -2.098536 | -1.980284 |
| 33 | 6 | 0 | 5.660624  | -3.134847 | -2.263658 |
| 34 | 6 | 0 | 6.678388  | -3.554394 | -1.403751 |
| 35 | 6 | 0 | 5.517568  | -3.701091 | -3.532883 |
| 36 | 6 | 0 | 7.542028  | -4.564931 | -1.831352 |
| 37 | 6 | 0 | 6.396252  | -4.700845 | -3.948040 |
| 38 | 6 | 0 | 7.410883  | -5.140873 | -3.096177 |
| 39 | 1 | 0 | -0.795409 | 0.980226  | -2.333684 |
| 40 | 1 | 0 | -2.504393 | 0.562994  | -2.197363 |
| 41 | 1 | 0 | -1.945793 | -1.912994 | 0.427612  |
| 42 | 1 | 0 | -1.798893 | -0.299875 | 1.138995  |
| 43 | 1 | 0 | -0.335839 | 4.688583  | 0.671745  |
| 44 | 1 | 0 | -6.553341 | -2.027684 | -0.777306 |
| 45 | 1 | 0 | -8.286887 | -0.381441 | -1.136678 |
| 46 | 1 | 0 | -8.995070 | 1.984221  | -1.342739 |
| 47 | 1 | 0 | -7.327753 | 3.809877  | -1.017377 |
| 48 | 1 | 0 | -5.001591 | 3.285613  | -0.441448 |
| 49 | 1 | 0 | -4.815924 | 1.787974  | 2.177636  |
| 50 | 1 | 0 | -4.953326 | 3.332647  | 4.079450  |
| 51 | 1 | 0 | -3.281654 | 5.164909  | 4.347141  |
| 52 | 1 | 0 | -1.444779 | 5.406311  | 2.700482  |
| 53 | 1 | 0 | 0.050230  | -1.888656 | 1.063320  |
| 54 | 1 | 0 | 2.456729  | -2.445683 | 1.004026  |
| 55 | 1 | 0 | 2.867276  | -1.098749 | -2.866856 |
| 56 | 1 | 0 | 0.505206  | -0.410911 | -2.993769 |
| 57 | 1 | 0 | 6.785334  | -3.102590 | -0.427794 |
| 58 | 1 | 0 | 4.719507  | -3.349935 | -4.180186 |
| 59 | 1 | 0 | 8.332241  | -4.896838 | -1.162945 |
| 60 | 1 | 0 | 6.282419  | -5.136496 | -4.937319 |
| 61 | 1 | 0 | 8.094636  | -5.922252 | -3.416172 |
| 62 | 6 | 0 | 5.819617  | -0.133256 | 1.684825  |
| 63 | 6 | 0 | 4.828549  | 0.129234  | -0.418208 |
| 64 | 6 | 0 | 3.854954  | 0.488212  | 0.598499  |

|     |   |   |           |           |           |
|-----|---|---|-----------|-----------|-----------|
| 65  | 8 | 0 | 2.724823  | 0.973263  | 0.472191  |
| 66  | 6 | 0 | 4.787678  | 0.850208  | -1.745394 |
| 67  | 1 | 0 | 3.760425  | 1.108838  | -2.019449 |
| 68  | 1 | 0 | 5.225543  | 0.245346  | -2.545354 |
| 69  | 1 | 0 | 5.352682  | 1.791439  | -1.695339 |
| 70  | 6 | 0 | 6.083460  | -0.091388 | 0.301639  |
| 71  | 6 | 0 | 6.815267  | -0.373368 | 2.623620  |
| 72  | 6 | 0 | 7.388952  | -0.282486 | -0.150165 |
| 73  | 6 | 0 | 8.405179  | -0.520392 | 0.781140  |
| 74  | 1 | 0 | 9.426546  | -0.663328 | 0.437941  |
| 75  | 6 | 0 | 8.117750  | -0.571662 | 2.147810  |
| 76  | 1 | 0 | 8.916476  | -0.755930 | 2.861286  |
| 77  | 1 | 0 | 6.591793  | -0.386305 | 3.681694  |
| 78  | 1 | 0 | 7.612182  | -0.247883 | -1.212948 |
| 79  | 7 | 0 | 4.434417  | 0.142569  | 1.872596  |
| 80  | 6 | 0 | 3.804215  | 0.120749  | 3.110034  |
| 81  | 8 | 0 | 4.378288  | 0.141298  | 4.176843  |
| 82  | 8 | 0 | 2.458326  | 0.024026  | 2.947192  |
| 83  | 6 | 0 | 1.582161  | 0.224908  | 4.012912  |
| 84  | 6 | 0 | 0.491436  | 1.048664  | 3.733987  |
| 85  | 6 | 0 | 1.716570  | -0.414176 | 5.245012  |
| 86  | 6 | 0 | -0.485823 | 1.241441  | 4.710178  |
| 87  | 1 | 0 | 0.433163  | 1.526336  | 2.761176  |
| 88  | 6 | 0 | 0.732180  | -0.206607 | 6.213866  |
| 89  | 1 | 0 | 2.574796  | -1.043331 | 5.441638  |
| 90  | 6 | 0 | -0.366334 | 0.614665  | 5.953070  |
| 91  | 1 | 0 | -1.334989 | 1.885215  | 4.497909  |
| 92  | 1 | 0 | 0.829470  | -0.694692 | 7.180006  |
| 93  | 1 | 0 | -1.125194 | 0.766975  | 6.715740  |
| 94  | 6 | 0 | -4.093939 | -3.106328 | -0.319547 |
| 95  | 6 | 0 | 0.306560  | 3.195804  | -1.519268 |
| 96  | 8 | 0 | 1.106515  | 2.015216  | -1.619260 |
| 97  | 1 | 0 | 1.574385  | 1.798513  | -0.785268 |
| 98  | 6 | 0 | -0.260247 | 3.404823  | -2.940875 |
| 99  | 6 | 0 | 0.547533  | 3.095688  | -4.045168 |
| 100 | 6 | 0 | -1.532353 | 3.942628  | -3.172846 |
| 101 | 6 | 0 | 0.088710  | 3.307036  | -5.344657 |
| 102 | 1 | 0 | 1.536869  | 2.687589  | -3.872792 |
| 103 | 6 | 0 | -1.990935 | 4.158310  | -4.475464 |
| 104 | 1 | 0 | -2.173973 | 4.193524  | -2.334086 |
| 105 | 6 | 0 | -1.183978 | 3.838568  | -5.566400 |
| 106 | 1 | 0 | 0.729463  | 3.059092  | -6.187171 |
| 107 | 1 | 0 | -2.982950 | 4.574026  | -4.632355 |
| 108 | 1 | 0 | -1.541241 | 4.002683  | -6.579602 |
| 109 | 6 | 0 | 1.191524  | 4.414115  | -1.144154 |
| 110 | 6 | 0 | 2.304580  | 4.247812  | -0.306987 |
| 111 | 6 | 0 | 0.897654  | 5.706022  | -1.603830 |
| 112 | 6 | 0 | 3.098374  | 5.338346  | 0.052606  |
| 113 | 1 | 0 | 2.567426  | 3.268805  | 0.079128  |
| 114 | 6 | 0 | 1.690051  | 6.796964  | -1.242593 |
| 115 | 1 | 0 | 0.047156  | 5.866526  | -2.257907 |
| 116 | 6 | 0 | 2.797077  | 6.618146  | -0.413386 |
| 117 | 1 | 0 | 3.957577  | 5.180813  | 0.699410  |
| 118 | 1 | 0 | 1.441702  | 7.786281  | -1.618525 |
| 119 | 1 | 0 | 3.418712  | 7.465142  | -0.135212 |
| 120 | 8 | 0 | -2.918582 | -3.194200 | -1.155732 |

|     |   |   |           |           |           |
|-----|---|---|-----------|-----------|-----------|
| 121 | 1 | 0 | -2.853174 | -4.112717 | -1.462494 |
| 122 | 6 | 0 | -5.168570 | -4.017594 | -0.952340 |
| 123 | 6 | 0 | -5.994505 | -4.867455 | -0.207559 |
| 124 | 6 | 0 | -5.309265 | -4.004300 | -2.351262 |
| 125 | 6 | 0 | -6.935219 | -5.683159 | -0.842570 |
| 126 | 1 | 0 | -5.903482 | -4.902520 | 0.872335  |
| 127 | 6 | 0 | -6.245834 | -4.819120 | -2.984138 |
| 128 | 1 | 0 | -4.679073 | -3.344725 | -2.939641 |
| 129 | 6 | 0 | -7.063856 | -5.664287 | -2.230457 |
| 130 | 1 | 0 | -7.562792 | -6.339272 | -0.245314 |
| 131 | 1 | 0 | -6.337222 | -4.792913 | -4.066791 |
| 132 | 1 | 0 | -7.793311 | -6.302205 | -2.722113 |
| 133 | 6 | 0 | -3.758347 | -3.552192 | 1.121455  |
| 134 | 6 | 0 | -2.720572 | -4.462989 | 1.358919  |
| 135 | 6 | 0 | -4.500163 | -3.088273 | 2.216753  |
| 136 | 6 | 0 | -2.430625 | -4.898065 | 2.652908  |
| 137 | 1 | 0 | -2.116713 | -4.821460 | 0.531468  |
| 138 | 6 | 0 | -4.215220 | -3.526216 | 3.511318  |
| 139 | 1 | 0 | -5.302511 | -2.374086 | 2.057821  |
| 140 | 6 | 0 | -3.178460 | -4.432774 | 3.735185  |
| 141 | 1 | 0 | -1.615790 | -5.599053 | 2.813296  |
| 142 | 1 | 0 | -4.800795 | -3.149684 | 4.345822  |
| 143 | 1 | 0 | -2.950808 | -4.767897 | 4.743242  |

-----

All calculations were performed with the Gaussian 03 program<sup>1</sup>. Geometries were fully optimized and characterized by frequency calculation using the the B3LYP density functional theory (DFT)<sup>2, 3</sup> with the 6-31G(d) basis set. Free energies (298.15 K, 1 atm) were initially computed for the gas phase. Weak hydrogen bond (between the benzene ring of **I** and the enolate **II**), C-H···O. However, the interaction of **TS-I** is stronger than that of **TS-II** (2.5 kcal/mol vs. 1.0 kcal/mol), which were evaluated by second order perturbation theory analysis in NBO at the M062X/6-31g\*\* level.

## Supplementary Methods

### General

Nuclear Magnetic Resonance (NMR) spectra were recorded on Varian 600 MR ( $^1\text{H}$  600 MHz,  $^{13}\text{C}$  150 MHz), Varian 400 MR ( $^1\text{H}$  400 MHz,  $^{13}\text{C}$  100 Mz) and JEOL ECS-400 ( $^1\text{H}$  400 MHz,  $^{13}\text{C}$  100 Mz) spectrometer. Chemical shifts for  $^1\text{H}$  NMR were reported in parts per million (ppm) relative to residual  $\text{CHCl}_3$  in  $\text{CDCl}_3$  ( $\delta$  7.26 ppm). Data is reported as follows: chemical shift, multiplicity (s = singlet, d = doublet, t = triplet, q = quartet, quin = quintet, sext = sextet, sep = septet, b = broad, m = multiplet), coupling constants, and integration. Chemical shifts for  $^{13}\text{C}$  NMR were reported in parts per million (ppm) relative to  $\text{CDCl}_3$  ( $\delta$  77.16 ppm) with complete proton decoupling. Infrared (IR) spectra were recorded on JASCO FT/IR-4100 spectrophotometer and Varian 7000e FT-IR spectrometer,  $\text{Vmax}$  in  $\text{cm}^{-1}$ . High-resolution mass spectrometry was performed on a JEOL JMS-700 MStation (FAB-MS and EI-MS), Agilent 6520 Accurate Mass Q-TOF LC/MS (ESI-MS) and Thermo Fisher Scientific EXACTIVE Plus (ESI-MS). Optical rotations were measured on a JASCO DIP-1000. Melting point was recorded on a SANSYO SMP-300. Enantiomeric ratios were determined by analytical liquid chromatography (HPLC) Shimadzu chromatograph (DAICEL CHIRALPAK<sup>®</sup> AS-3 (4.6  $\times$  150 mm), DAICEL CHIRALPAK<sup>®</sup> AD-H (4.6  $\times$  250 mm) in comparison with authentic racemic materials. Column chromatography was performed with silica gel 60 N (spherical, neutral, 40–50  $\mu\text{m}$ ) purchased from Kanto Chemical. All experiments were carried out under argon atmosphere unless otherwise noted.

### Materials

All reagents were obtained commercially available and used as received unless otherwise noted. MeCN,  $\text{CH}_2\text{Cl}_2$ , toluene, and  $\text{Et}_3\text{N}$  were distilled over  $\text{CaH}_2$ . Dry tetrahydrofuran [THF] and dry  $\text{Et}_2\text{O}$  were purchased from Wako Pure Chemical Industries, Ltd. and used without further purification. Dry dimethylformamide [DMF] and 3-methyl-2-oxindole were purchased from Sigma-ALDRICH Japan and used without further purification. (*S*)-(-)-1,1'-Bi-2-naphthol [(*S*)-BINOL] (>99% ee) was purchased from KANTO CHEMICAL CO.,INC. and used without further purification. ( $\pm$ )-1-Phenylethanol **11** was purchased from NAKARAI TESQUE, INC. and used without further purification. ( $\pm$ )-Hydrobenzoin **5** was purchased from Tokyo Chemical Industry Co., Ltd. and used without further purification. **18**<sup>4</sup>, **19**<sup>5</sup>, **23**<sup>5</sup>, **24**<sup>5</sup>, **3-4**<sup>6</sup>, **6-7**<sup>6</sup>, **25**<sup>7</sup>, **30**<sup>6</sup>, **31**<sup>8</sup>, **9a**<sup>9</sup>, **9b**<sup>10</sup>, **9d-i**<sup>10</sup>, **9j**<sup>9,10</sup>, **9k-l**<sup>10</sup>, **9m**<sup>9</sup>, **9n-o**<sup>10</sup>, **9p**<sup>10,11</sup> and **15**<sup>12</sup> were prepared by reported procedures. All of new compounds were described spectral data at following. **2**, **3**<sup>13</sup>, **5**<sup>6</sup> was synthesized by modified known method.

### Synthesis of catalyst 1a–1p

#### Synthesis of Catalyst 1a

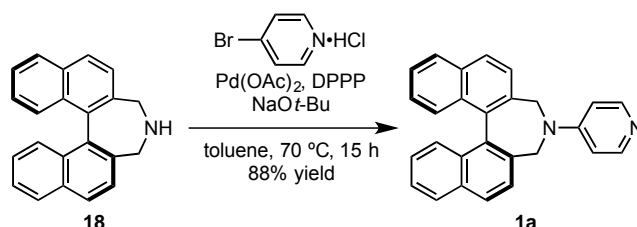

#### (*S*)-4-(pyridin-4-yl)-4,5-dihydro-3*H*-dinaphtho[2,1-*c*:1',2'-*e*]azepine (**1a**)

To a suspension of **18**<sup>4</sup> (52.4 mg, 0.177 mmol), 4-bromopyridine hydrochloride (69.0 mg, 0.355 mmol),  $\text{NaO}t\text{-Bu}$  (68.0 mg, 0.708 mmol) and 1,3-bis(diphenylphosphino)propane [DPPP] (2.90 mg, 7.03  $\mu\text{mol}$ ) in toluene (1.61 mL) was added  $\text{Pd}(\text{OAc})_2$  (1.60 mg, 7.13  $\mu\text{mol}$ ) at room temperature. The reaction mixture was

warmed up to 70 °C and stirred for 15 h. After being cooled to room temperature, saturated aqueous NaHCO<sub>3</sub> (30 mL) was added to reaction mixture and extracted with toluene (10 mL × 2). The organic layer was washed with saturated aqueous NaHCO<sub>3</sub> (5 mL × 2), dried over MgSO<sub>4</sub>, and concentrated *in vacuo*. The purification of the crude product by flash column chromatography on silica gel (eluent: CH<sub>2</sub>Cl<sub>2</sub>/MeOH = 5/1 to 2/1, v/v) gave **1a** (58.0 mg, 0.156 mmol, 88% yield) as a colorless solid.

<sup>1</sup>H NMR (600 MHz, CDCl<sub>3</sub>) δ 8.30 (d, *J* = 6.6 Hz, 2H), 7.96 (d, *J* = 8.4 Hz, 4H), 7.57–7.47 (m, 6H), 7.32 (td, *J* = 7.8, 1.4 Hz, 2H), 6.80 (d, *J* = 6.6 Hz, 2H), 4.67 (d, *J* = 12.6 Hz, 2H), 3.89 (d, *J* = 12.6 Hz, 2H); <sup>13</sup>C NMR (150 MHz, CDCl<sub>3</sub>) δ 153.5, 150.3, 135.0, 133.5, 132.9, 131.5, 129.4, 128.5, 127.6, 127.4, 126.3, 126.1, 108.6, 50.7; IR (KBr) 1593, 1505, 1232, 827, 760 cm<sup>-1</sup>; HRMS (FAB<sup>+</sup>) calculated for C<sub>27</sub>H<sub>21</sub>N<sub>2</sub> [M+H]<sup>+</sup> 373.1699, found 373.1693; mp 261.0–261.7 °C; [α]<sub>D</sub><sup>22</sup> -439.8 (*c* 1.15, CHCl<sub>3</sub>, (*S*)-configuration).

### An overview for synthesis of catalyst **1b**

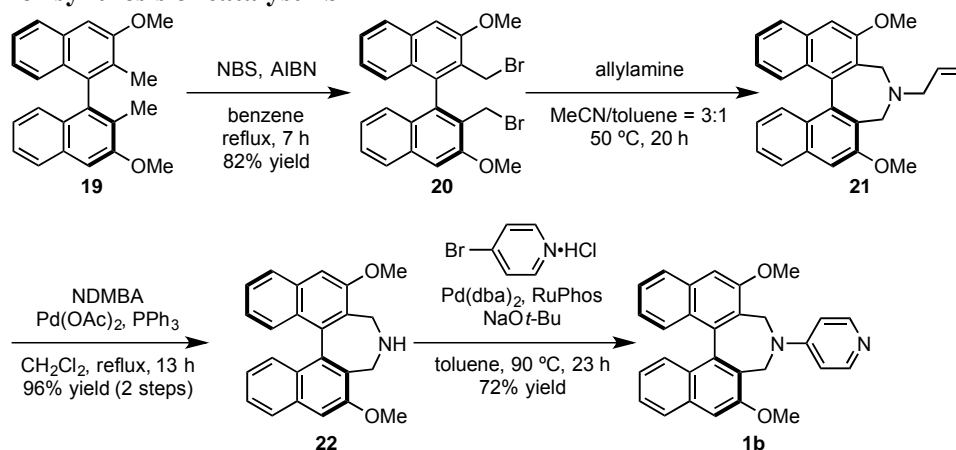

### Synthesis of **20**

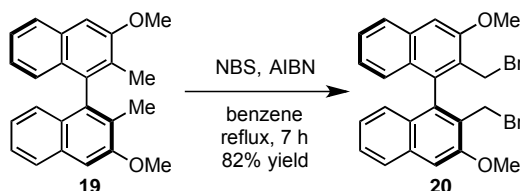

### (*S*)-2,2'-bis(bromomethyl)-3,3'-dimethoxy-1,1'-binaphthalene (**20**)

To a solution of **19**<sup>5</sup> (6.19 g, 18.1 mmol) and *N*-bromosuccinimide [NBS] (7.08 g, 39.8 mmol) in benzene (90.5 mL) was added azobisisobutyronitrile [AIBN] (297 mg, 1.81 mmol) at room temperature. The reaction mixture was warmed up to refluxed temperature and stirred for 7 h. After being cooled to room temperature, water (30 mL) was added to reaction mixture. The resulting solution was extracted with toluene (30 mL × 2), and the organic layer was washed with saturated aqueous NaHCO<sub>3</sub> (20 mL × 2), and brine (20 mL × 2), dried over MgSO<sub>4</sub> and concentrated *in vacuo*. The purification of the crude product by recrystallization from CH<sub>2</sub>Cl<sub>2</sub>/hexane gave **20** (7.39 g, 14.8 mmol, 82% yield) as a colorless solid.

<sup>1</sup>H NMR (400 MHz, CDCl<sub>3</sub>) δ 7.81 (d, *J* = 8.2 Hz, 2H), 7.44 (ddd, *J* = 8.2, 6.9, 1.5 Hz, 2H), 7.33 (s, 2H), 7.11 (ddd, *J* = 8.2, 6.9, 1.5 Hz, 2H), 6.99 (bd, *J* = 8.2 Hz, 2H), 4.34 (d, *J* = 9.4 Hz, 2H), 4.28 (d, *J* = 9.4 Hz, 2H), 4.11 (s, 6H); <sup>13</sup>C NMR (100 MHz, CDCl<sub>3</sub>) δ 155.7, 136.5, 134.8, 127.8, 127.4, 127.4, 126.8, 124.3, 106.5, 56.0, 27.9; IR (KBr) 3060, 2935, 1599, 1170, 750 cm<sup>-1</sup>; HRMS (FAB<sup>+</sup>) [M+H]<sup>+</sup> calculated for C<sub>24</sub>H<sub>21</sub>Br<sub>2</sub>O<sub>2</sub> 500.9883, found 500.9875; mp 189.9–190.5 °C; [α]<sub>D</sub><sup>20</sup> +163.5 (*c* 0.22, CHCl<sub>3</sub>, (*S*)-configuration).

## Synthesis of 21

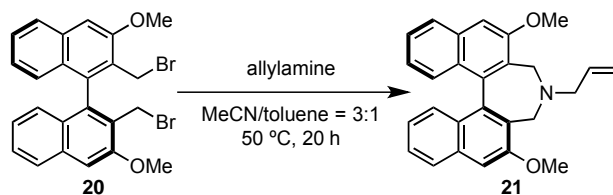

### (S)-4-allyl-2,2'-dimethoxy-4,5-dihydro-3H-dinaphtho[2,1-c:1',2'-e]azepine (21)

To a solution of **20** (1.58 g, 3.16 mmol) in MeCN (31.6 mL) and toluene (10.5 mL) was added allylamine (781  $\mu$ L, 10.4 mmol) at room temperature. The reaction mixture was warmed up to 50 °C and stirred for 20 h. After being cooled to room temperature, water (50 mL) was added to reaction mixture. The resulting solution was extracted with EtOAc (50 mL  $\times$  2), and the organic layer was washed with water (30 mL  $\times$  2) and brine (10 mL  $\times$  2), dried over MgSO<sub>4</sub> and concentrated *in vacuo*. The crude product was directly used for the following reaction without further purification. The analytical data of **21** was obtained by the purification of the crude product by flash column chromatography on silica gel (eluent: hexane/EtOAc = 3/1 to 2/1, v/v) as a colorless solid.

<sup>1</sup>H NMR (400 MHz, CDCl<sub>3</sub>)  $\delta$  7.83 (d,  $J$  = 8.3 Hz, 2H), 7.41 (ddd,  $J$  = 8.3, 6.8, 1.3 Hz, 2H), 7.34 (d,  $J$  = 8.3 Hz, 2H), 7.28 (s, 2H), 7.10 (ddd,  $J$  = 8.3, 6.8, 1.3 Hz, 2H), 6.08–5.98 (m, 1H), 5.23–5.14 (m, 2H), 4.36 (d,  $J$  = 12.4 Hz, 2H), 4.02 (s, 6H), 3.25 (dd,  $J$  = 13.2, 6.7 Hz, 1H), 2.98 (dd,  $J$  = 13.2, 6.7 Hz, 1H), 2.78 (d,  $J$  = 12.4 Hz, 2H); <sup>13</sup>C NMR (100 MHz, CDCl<sub>3</sub>)  $\delta$  155.5, 137.1, 136.6, 134.2, 127.7, 127.2, 127.0, 126.3, 126.1, 123.5, 117.5, 105.6, 59.2, 55.6, 46.7; IR (KBr) 2950, 2827, 1596, 1226, 752 cm<sup>-1</sup>; HRMS (FAB<sup>+</sup>) calculated for C<sub>27</sub>H<sub>26</sub>NO<sub>2</sub> [M+H]<sup>+</sup> 396.1958, found 396.1961; mp 158.0–158.7 °C; [ $\alpha$ ]<sub>D</sub><sup>20</sup> +438.8 (*c* 0.23, CHCl<sub>3</sub>, (S)-configuration).

## Synthesis of 22

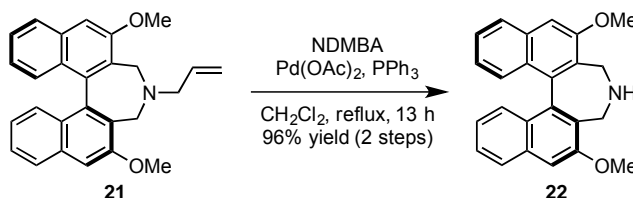

### (S)-2,2'-dimethoxy-4,5-dihydro-3H-dinaphtho[2,1-c:1',2'-e]azepine (22)

To a solution of **21** (1.21 g, 3.06 mmol), *N,N'*-dimethylbarbituric acid [NDMBA] (1.43 g, 9.15 mmol), PPh<sub>3</sub> (160 mg, 0.608 mmol) in CH<sub>2</sub>Cl<sub>2</sub> (30.4 mL) was added Pd(OAc)<sub>2</sub> (34.5 mg, 0.153 mmol) at room temperature. The reaction mixture was warmed up to refluxed temperature and stirred for 13 h. After being cooled to room temperature, saturated aqueous NaHCO<sub>3</sub> (30 mL) was added to reaction mixture. The resulting solution was extracted with EtOAc (30 mL  $\times$  2) and the organic layer was washed with saturated aqueous NaHCO<sub>3</sub> (10 mL  $\times$  2) and brine (10 mL  $\times$  2), dried over MgSO<sub>4</sub> and concentrated *in vacuo*. The purification of the crude product by flash column chromatography on silica gel (eluent: EtOAc to EtOAc + 1% Et<sub>3</sub>N) gave **22** (1.08 g, 3.04 mmol, 96% yield based on **20**) as a pale yellow solid.

<sup>1</sup>H NMR (400 MHz, CDCl<sub>3</sub>)  $\delta$  7.83 (d,  $J$  = 8.3 Hz, 2H), 7.41 (ddd,  $J$  = 8.3, 6.8, 1.3 Hz, 2H), 7.34 (d,  $J$  = 8.3 Hz, 2H), 7.29 (s, 2H), 7.11 (ddd,  $J$  = 8.3, 6.8, 1.3 Hz, 2H), 4.47 (d,  $J$  = 12.0 Hz, 2H), 4.03 (s, 6H), 3.04 (d,  $J$  = 12.0 Hz, 2H), 1.69 (bs, 1H); <sup>13</sup>C NMR (100 MHz, CDCl<sub>3</sub>)  $\delta$  155.0, 137.0, 134.1, 127.6, 127.4, 127.2, 127.0, 126.0, 123.5, 106.0, 55.6, 40.1; IR (KBr) 2934, 1595, 1231, 832, 748 cm<sup>-1</sup>; HRMS (FAB<sup>+</sup>) [M+H]<sup>+</sup> calculated for C<sub>24</sub>H<sub>22</sub>NO<sub>2</sub> 356.1645, found 356.1655; mp 101.8–102.4 °C; [ $\alpha$ ]<sub>D</sub><sup>20</sup> +388.5 (*c* 0.20, CHCl<sub>3</sub>, (S)-configuration).



## Synthesis of 1b

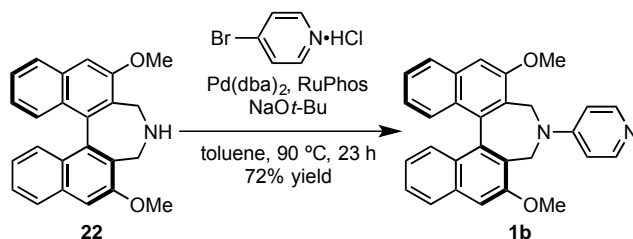

### (S)-2,6-dimethoxy-4-(pyridin-4-yl)-4,5-dihydro-3H-dinaphtho[2,1-c:1',2'-e]azepine (**1b**)

To a solution of **22** (733 mg, 2.06 mmol), 4-bromopyridine hydrochloride (801 mg, 4.12 mmol),  $\text{NaOt-Bu}$  (1.19 g, 12.4 mmol), 2-dicyclohexylphosphino-2',6'-di-*i*-propoxy-1,1'-biphenyl [RuPhos] (77.2 mg, 0.165 mmol) in toluene (20.6 mL) was added bis(dibenzylideneacetone)palladium(0) [ $\text{Pd}(\text{dba})_2$ ] (47.4 mg, 82.4  $\mu\text{mol}$ ) at room temperature. The reaction mixture was warmed up to  $90\text{ }^\circ\text{C}$  and stirred for 23 h. After being cooled to room temperature, water (20 mL) was added to reaction mixture, and passed through a short pad of celite. The resulting solution was extracted with toluene ( $30\text{ mL} \times 2$ ), and the organic layer was washed with brine ( $10\text{ mL} \times 2$ ), dried over  $\text{MgSO}_4$  and concentrated *in vacuo*. The purification of the crude product by flash column chromatography on silica gel (eluent: EtOAc to EtOAc + 2%  $\text{Et}_3\text{N}$ ) gave **1b** (639 mg, 1.48 mmol, 72% yield) as a pale yellow solid.

$^1\text{H}$  NMR (400 MHz,  $\text{CDCl}_3$ )  $\delta$  8.25 (d,  $J = 6.6\text{ Hz}$ , 2H), 7.83 (d,  $J = 8.0\text{ Hz}$ , 2H), 7.44 (t,  $J = 8.0\text{ Hz}$ , 2H), 7.38 (d,  $J = 8.0\text{ Hz}$ , 2H), 7.28 (s, 2H), 7.15 (t,  $J = 8.0\text{ Hz}$ , 2H), 6.85 (d,  $J = 6.6\text{ Hz}$ , 2H), 5.38 (d,  $J = 12.6\text{ Hz}$ , 2H), 3.96 (s, 6H), 3.36 (d,  $J = 12.6\text{ Hz}$ , 2H);  $^{13}\text{C}$  NMR (100 MHz,  $\text{CDCl}_3$ )  $\delta$  154.7, 154.0, 149.7, 137.2, 134.3, 127.7, 127.3, 126.9, 126.6, 125.4, 123.9, 108.9, 106.4, 55.8, 41.4; IR (KBr) 3421, 3003, 2937, 1507, 749  $\text{cm}^{-1}$ ; HRMS (FAB $^+$ ) calculated for  $\text{C}_{29}\text{H}_{25}\text{N}_2\text{O}_2$  [ $\text{M}+\text{H}$ ] $^+$  433.1910, found 433.1907; mp  $154.3\text{--}155.3\text{ }^\circ\text{C}$ ; [ $\alpha$ ] $^{20}_{\text{D}}$   $-293.7$  ( $c$  0.20,  $\text{CHCl}_3$ , (*S*)-configuration).

## Synthesis of 1c

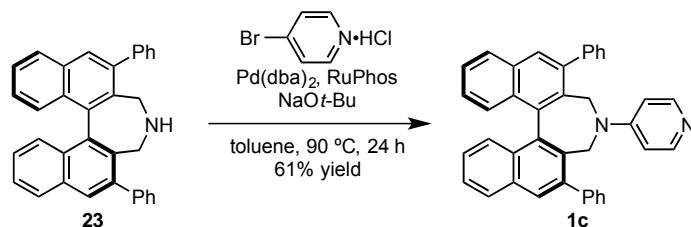

### (S)-2,6-diphenyl-4-(pyridin-4-yl)-4,5-dihydro-3H-dinaphtho[2,1-c:1',2'-e]azepine (**1c**)

To a solution of **23**<sup>5</sup> (58.0 mg, 0.130 mmol), 4-bromopyridine hydrochloride (50.9 mg, 0.262 mmol),  $\text{NaOt-Bu}$  (75.1 mg, 0.781 mmol), RuPhos (4.90 mg, 10.5  $\mu\text{mol}$ ) in toluene (1.30 mL) was added  $\text{Pd}(\text{dba})_2$  (3.00 mg, 5.22  $\mu\text{mol}$ ) at room temperature. The reaction mixture was warmed up to  $90\text{ }^\circ\text{C}$  and stirred for 24 h. After being cooled to room temperature, water (2 mL) was added to reaction mixture, and then passed through a short pad of celite. The resulting solution was extracted with toluene ( $5\text{ mL} \times 2$ ) and the organic layer was washed with brine ( $5\text{ mL} \times 2$ ), dried over  $\text{MgSO}_4$  and concentrated *in vacuo*. The purification of the crude product by flash column chromatography on silica gel (eluent: hexane/EtOAc = 5/1 + 1%  $\text{Et}_3\text{N}$  to EtOAc + 1%  $\text{Et}_3\text{N}$ , v/v) gave **1c** (41.8 mg, 79.7  $\mu\text{mol}$ , 61% yield) as a colorless solid.

$^1\text{H}$  NMR (400 MHz,  $\text{CDCl}_3$ )  $\delta$  7.98–7.93 (m, 6H), 7.56–7.49 (m, 4H), 7.43–7.27 (m, 12H), 6.16 (d,  $J = 6.8\text{ Hz}$ , 2H), 4.88 (d,  $J = 13.0\text{ Hz}$ , 2H), 3.66 (d,  $J = 13.0\text{ Hz}$ , 2H);  $^{13}\text{C}$  NMR (100 MHz,  $\text{CDCl}_3$ )  $\delta$  152.4, 149.6, 140.9, 140.0, 136.4, 132.9, 131.3, 130.8, 130.0, 129.8, 128.6, 128.5, 127.8, 127.6, 126.6, 126.3, 108.5, 45.9; IR (KBr) 3053, 2925, 2852, 2360, 1593, 703  $\text{cm}^{-1}$ ; HRMS (FAB $^+$ ) calculated for  $\text{C}_{39}\text{H}_{29}\text{N}_2$  [ $\text{M}+\text{H}$ ] $^+$  525.2325,

found 525.2325; mp 143.5–144.0 °C;  $[\alpha]_D^{20}$  -170.3 (*c* 0.20, CHCl<sub>3</sub>, (*S*)-configuration).

### Synthesis of 1d

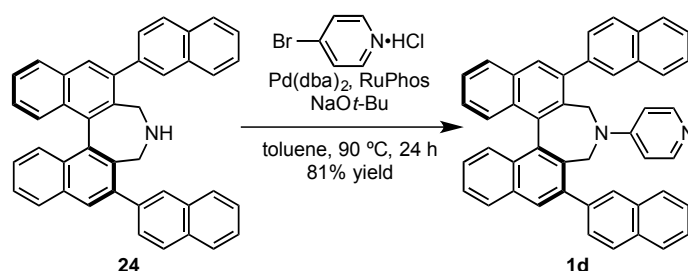

### (*S*)-2,6-di(naphthalen-2-yl)-4-(pyridin-4-yl)-4,5-dihydro-3H-dinaphtho[2,1-c:1',2'-e]azepine (1d)

To a solution of **24**<sup>5</sup> (201 mg, 0.367 mmol), 4-bromopyridine hydrochloride (143 mg, 0.734 mmol), NaOt-Bu (212 mg, 2.21 mmol), RuPhos (13.7 mg, 29.4 μmol) in toluene (3.70 mL) was added Pd(dba)<sub>2</sub> (8.60 mg, 15.0 μmol) at room temperature. The reaction mixture was warmed up to 90 °C and stirred for 24 h. After being cooled to room temperature, CHCl<sub>3</sub> (10 mL) and water (5 mL) was added to reaction mixture, and then passed through a short pad of celite. The resulting solution was extracted with CHCl<sub>3</sub> (5 mL × 2) and the organic layer was washed with brine (10 mL × 2), dried over MgSO<sub>4</sub> and concentrated *in vacuo*. The purification of the crude product by recrystallization from CHCl<sub>3</sub>/hexane gave **1d** (187 mg, 0.299 mmol, 81% yield) as a colorless solid.

<sup>1</sup>H NMR (400 MHz, CDCl<sub>3</sub>) δ 8.07 (s, 2H), 7.99 (d, *J* = 8.4 Hz, 2H), 7.89 (d, *J* = 8.0 Hz, 4H), 7.83 (bd, *J* = 5.6 Hz, 4H), 7.57–7.49 (m, 10H), 7.36 (t, *J* = 7.4 Hz, 4H), 6.05 (d, *J* = 5.6 Hz, 2H), 4.97 (bd, *J* = 13.2 Hz, 2H), 3.79 (bd, *J* = 13.2 Hz, 2H); <sup>13</sup>C NMR (150 MHz, CDCl<sub>3</sub>) δ 152.4, 149.5, 139.9, 136.4, 133.3, 133.0, 132.6, 131.4, 130.9, 130.4, 128.9, 128.6, 128.2, 127.8, 126.8, 126.7, 126.5, 126.4, 108.6, 46.3; IR (KBr) 3053, 2866, 2359, 1589, 749 cm<sup>-1</sup>; HRMS (FAB<sup>+</sup>) calculated for C<sub>47</sub>H<sub>33</sub>N<sub>2</sub> [M+H]<sup>+</sup> 625.2638, found 625.2656; mp >280 °C;  $[\alpha]_D^{20}$  -173.6 (*c* 0.20, CHCl<sub>3</sub>, (*S*)-configuration).

### An overview for synthesis of catalyst 1e

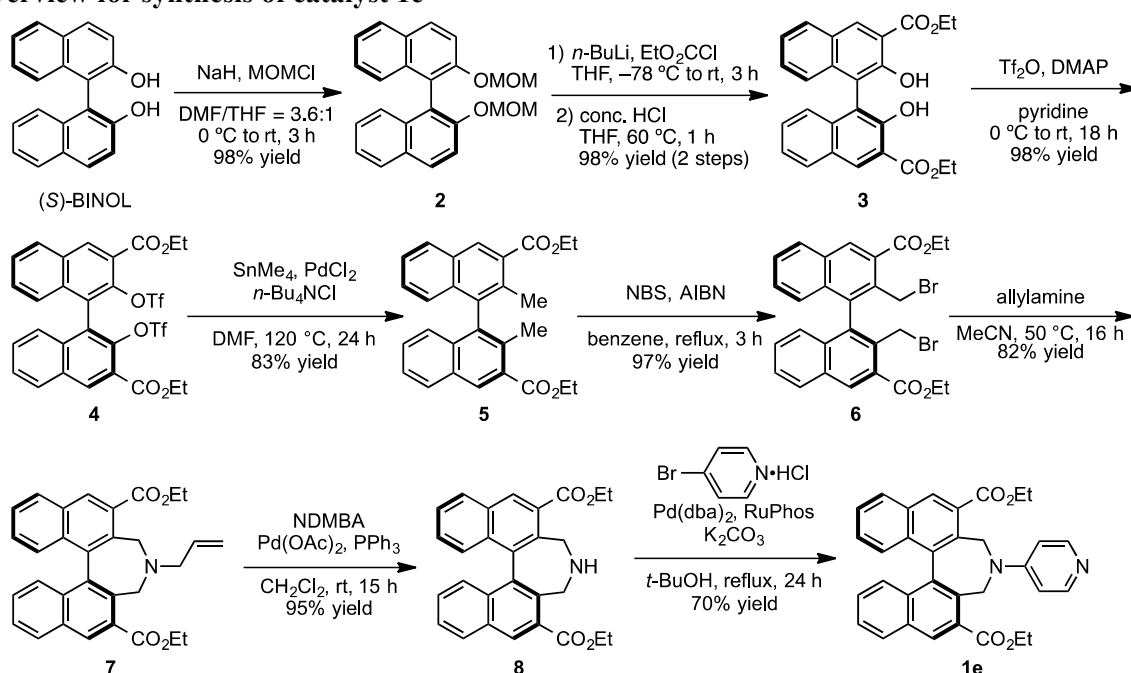

## Synthesis of 2

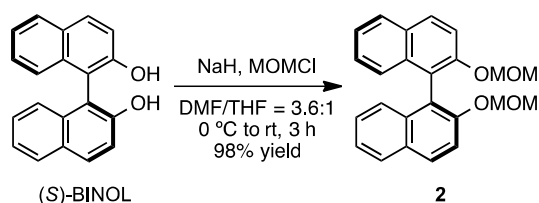

### (S)-2,2'-Bis(methoxymethoxy)-1,1'-binaphthalene (**2**)<sup>13</sup>

We modified solvent, substrate concentration, and purification method of known procedure.<sup>13</sup>

To a suspension of NaH (60% dispersion in paraffin liquid, 15.4 g, 385 mmol) in DMF (77.0 mL) was added dropwise solution of (S)-BINOL (50.0 g, 175 mmol) in THF (40.0 mL) and DMF (65.5 mL) for 10 min at 0 °C. The resulting solution was warmed up to room temperature and stirred for 5 min at room temperature, then chloromethyl methyl ether [MOMCl] (29.2 mL, 384 mmol) was added dropwise for 40 min at room temperature. The reaction mixture was stirred for 3 h. After stirring for 3 h, the reaction mixture was poured into cold water (200 mL). The resulting solution was extracted with EtOAc (300 mL  $\times$  3), washed with brine (300 mL), dried over Mg<sub>2</sub>SO<sub>4</sub> and concentrated *in vacuo*. The purification of the crude product by recrystallization from toluene/hexane gave **2** (64.5 g, 172 mmol, 98% yield) as a colorless solid.

<sup>1</sup>H NMR (400 MHz, CDCl<sub>3</sub>)  $\delta$  7.96 (d, *J* = 9.0 Hz, 2H), 7.88 (d, *J* = 8.3 Hz, 2H), 7.58 (d, *J* = 9.0 Hz, 2H), 7.35 (ddd, *J* = 8.3, 6.8, 1.3 Hz), 7.23 (ddd, *J* = 8.3, 6.8, 1.4 Hz, 2H), 7.16 (d, *J* = 8.3 Hz, 2H), 5.10 (d, *J* = 6.8 Hz, 2H), 4.99 (d, *J* = 6.8 Hz, 2H), 3.15 (s, 6H); <sup>13</sup>C NMR (100 MHz, CDCl<sub>3</sub>)  $\delta$  152.8, 134.1, 130.0, 129.5, 128.0, 126.4, 125.7, 124.2, 121.4, 117.4, 95.3, 56.0; IR (KBr) 2952, 1622, 1593, 1507, 1478, 1241, 1089, 1041 cm<sup>-1</sup>.

## Synthesis of 3

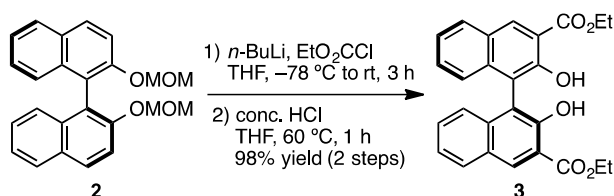

### (S)-Diethyl 2,2'-dihydroxy-[1,1'-binaphthalene]-3,3'-dicarboxylate (**3**)<sup>6</sup>

We modified substrate concentration and purification method of known procedure.<sup>13</sup>

To a solution of **2** (29.5 g, 78.8 mmol) in THF (200 mL) was added dropwise solution of *n*-BuLi (1.58 M, 125 mL, 197 mmol) in hexane for 10 min at -78 °C. The reaction solution was warmed up to room temperature and stirred for 1 h. After stirring for 1 h, the reaction suspension was re-cooled to -78 °C and Et<sub>2</sub>CO<sub>2</sub>Cl was carefully added dropwise for 20 min at -78 °C. The reaction mixture was warmed up room temperature and stirred for 2 h, then water was carefully added to quench the reaction. After removal water using syringe from the mixture, 6 M aqueous HCl (200 mL, 1.20 mol) was added to resulting solution. The reaction solution was heated to 60 °C and stirred for 1 h. After being cooled to room temperature, the resulting solid was collected by filtration and washed with copious hexane. After drying of the solid, **3** (33.1 g, 76.9 mmol, 98% yield based on **2**) was isolated as a yellow solid.

<sup>1</sup>H NMR (400 MHz, CDCl<sub>3</sub>)  $\delta$  10.81 (s, 2H), 8.69 (s, 2H), 7.94–7.92 (m, 2H), 7.36–7.32 (m, 4H), 7.16–7.14 (m, 2H), 4.49–4.55 (m, 4H), 1.56 (t, *J* = 7.0 Hz, 6H); <sup>13</sup>C NMR (100 MHz, CDCl<sub>3</sub>)  $\delta$  170.3, 154.2, 137.3, 132.9, 129.9, 129.5, 127.3, 124.8, 124.0, 117.1, 114.5, 62.0, 14.4; IR (KBr) 2921, 1840, 1665, 1580, 1072, 846, 680 cm<sup>-1</sup>; [ $\alpha$ ]<sub>D</sub><sup>21</sup> -112.9 (*c* 1.04, CH<sub>2</sub>Cl<sub>2</sub>, (*S*)-configuration) [lit.<sup>6</sup> [ $\alpha$ ]<sub>D</sub><sup>27</sup> +168.5 (*c* 1.0, CH<sub>2</sub>Cl<sub>2</sub>, (*R*)-configuration)].

## Synthesis of 4

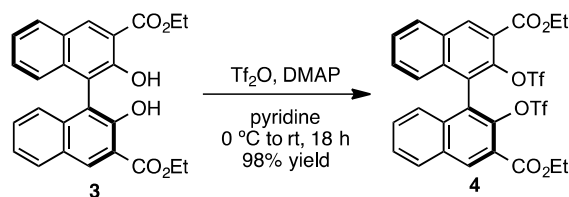

### (S)-Diethyl 2,2'-bis((trifluoromethyl)sulfonyloxy)-[1,1'-binaphthalene]-3,3'-dicarboxylate (**4**)<sup>6</sup>

To a solution of **3** (14.6 g, 33.9 mmol) and DMAP (828 mg, 6.78 mmol) in pyridine (188 mL) was added dropwise trifluoromethanesulfonic anhydride [ $\text{Tf}_2\text{O}$ ] (17.3 mL, 103 mmol) for 10 min at  $0\text{ }^\circ\text{C}$ . The reaction mixture was warmed up to room temperature and stirred for 18 h at room temperature. The resulting solution was poured carefully into cold water and extracted with  $\text{Et}_2\text{O}$  ( $200\text{ mL} \times 3$ ), washed with 6 M aqueous HCl ( $200\text{ mL} \times 3$ ), dried over  $\text{MgSO}_4$ , and concentration *in vacuo*. Subsequently, the resulting solid was subsequently thoroughly washed with MeOH. After filtration and drying of the solid, **4** (23.0 g, 33.1 mmol, 98% yield) was isolated as a colorless solid.

$^1\text{H}$  NMR (400 MHz,  $\text{CDCl}_3$ )  $\delta$  8.75 (s, 2H), 8.08 (d,  $J = 8.2\text{ Hz}$ , 2H), 7.63 (t,  $J = 7.5\text{ Hz}$ , 2H), 7.45 (t,  $J = 7.7\text{ Hz}$ , 2H), 7.19 (d,  $J = 8.6\text{ Hz}$ , 2H), 4.62–4.54 (m, 2H), 4.47–4.39 (m, 2H), 1.46 (t,  $J = 7.0\text{ Hz}$ , 6H);  $^{13}\text{C}$  NMR (100 MHz,  $\text{CDCl}_3$ )  $\delta$  164.6, 142.7, 135.8, 134.9, 131.5, 129.8, 129.6, 128.3, 127.7, 125.0, 124.1, 118.0 (q,  $J_{\text{C-F}} = 1275.5$ ), 62.6, 14.2; IR (KBr) 2900, 2359, 1987, 1836, 1750, 1587, 1498, 693  $\text{cm}^{-1}$ ;  $[\alpha]_{\text{D}}^{21} +116.2$  ( $c$  1.03,  $\text{CH}_2\text{Cl}_2$ , (S)-configuration) [lit.<sup>6</sup>  $[\alpha]_{\text{D}}^{27} -159.2$  ( $c$  1.0,  $\text{CH}_2\text{Cl}_2$ , (R)-configuration)].

## Synthesis of 5

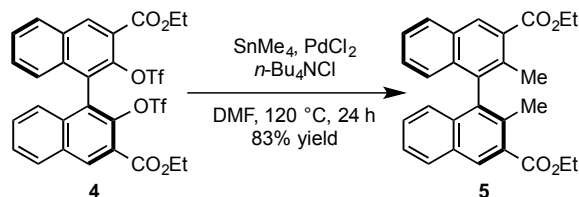

### (S)-Diethyl-2,2'-dimethyl-1,1'-binaphthyl-3,3'-dicarboxylate (**5**)<sup>6</sup>

Initially, Negishi cross coupling (with  $\text{Me}_2\text{Zn}$ ) was conducted in according literature,<sup>6</sup> but we modified this procedure to Migita-Kosugi-Stille cross coupling (with  $\text{Me}_4\text{Sn}$ ) because  $\text{Me}_2\text{Zn}$  is costly and pyrophoric reagent, and unsuitable for scale up.

#### Small scale reaction (2.00 mmol scale)

To a solution of **4**<sup>6</sup> (139 mg, 2.00 mmol), LiCl (86.5 mg, 2.04 mmol),  $n\text{-Bu}_4\text{NCl}$  (223 mg, 0.803 mmol) and  $\text{Me}_4\text{Sn}$  (83.0  $\mu\text{L}$ , 0.600 mmol) in DMF (2.70 mL) was added  $\text{PdCl}_2$  (3.70 mg, 20.9  $\mu\text{mol}$ ) at room temperature. The reaction mixture was heated at  $120\text{ }^\circ\text{C}$  and stirred for 24 h, then the reaction mixture was under reduced pressure to removed excess  $\text{Me}_4\text{Sn}$ , and the resulting suspension was filtered through a short pad of silica gel with copious washing  $\text{Et}_2\text{O}$ . The resulting solution was extracted with  $\text{Et}_2\text{O}$  ( $10\text{ mL} \times 3$ ). The organic layer was washed with water ( $5\text{ mL} \times 3$ ), dried over  $\text{MgSO}_4$  and concentrated *in vacuo*. The purification of the crude product by flash column chromatography on silica gel (eluent: hexane/ $\text{EtOAc} = 8/1$ , v/v) gave **5** (75.1 mg, 0.176 mmol, 88% yield) as a pale yellow solid.

#### Large scale reaction (32.0 mmol scale)

To a solution of **4**<sup>6</sup> (22.2 g, 32.0 mmol), LiCl (6.85 g, 162 mmol),  $n\text{-Bu}_4\text{NCl}$  (25.3 g, 91.0 mmol) and  $\text{Me}_4\text{Sn}$  (9.00 mL, 65.0 mmol) in DMF (175 mL) was added  $\text{PdCl}_2$  (397 mg, 2.24 mol) at room temperature. The

reaction mixture was heated at 120 °C and stirred for 20 h, then the reaction mixture was under reduced pressure to removed excess Me<sub>4</sub>Sn, and the resulting suspension was filtered through a short pad of silica gel with copious washing Et<sub>2</sub>O. The resulting solution was extracted with Et<sub>2</sub>O (150 mL × 3). The organic layer was washed with water (150 mL × 3), dried over MgSO<sub>4</sub> and concentrated *in vacuo*. The purification of the crude product by flash column chromatography on silica gel (eluent: hexane/Et<sub>2</sub>O = 5/1, v/v) gave **5** (11.3 g, 26.5 mmol, 83% yield) as a pale yellow solid.

<sup>1</sup>H NMR (400 MHz, CDCl<sub>3</sub>) δ 8.53 (s, 2H), 7.93 (d, *J* = 8.4 Hz, 2H), 7.45 (t, *J* = 7.3 Hz, 2H), 7.29 (ddd, *J* = 8.4, 7.3, 1.4 Hz, 2H), 6.96 (d, *J* = 8.4 Hz, 2H), 4.47 (q, *J* = 7.2 Hz, 4H), 2.22 (s, 6H), 1.48 (t, *J* = 7.2 Hz, 6H); <sup>13</sup>C NMR (100 MHz, CDCl<sub>3</sub>) δ 168.6, 136.9, 134.2, 133.9, 131.2, 129.9, 129.1, 128.5, 126.0, 125.9, 61.3, 18.1, 14.4; IR (KBr) 2927, 1926, 1726, 1622, 1202, 1062, 905, 788 cm<sup>-1</sup>; [α]<sup>23</sup><sub>D</sub> -23.4 (*c* 0.76, CH<sub>2</sub>Cl<sub>2</sub>, (*S*)-configuration) [lit.<sup>6</sup> [α]<sup>27</sup><sub>D</sub> +74.2 (*c* 0.76, CH<sub>2</sub>Cl<sub>2</sub>, (*R*)-configuration)].

### Synthesis of 6

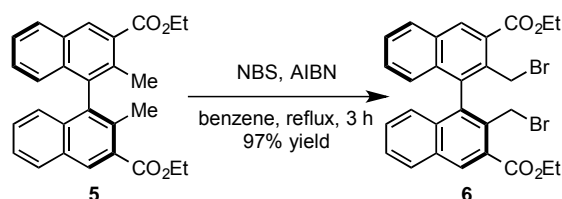

### (*S*)-Diethyl 2,2'-bis(bromomethyl)-1,1'-binaphthyl-3,3'-dicarboxylate (**6**)<sup>6</sup>

To a suspension of **5**<sup>6</sup> (11.3 g, 26.5 mmol), NBS (10.4 g, 58.4 mmol) in benzene (73.0 mL) was added AIBN (442 mg, 2.69 mmol) at room temperature. The reaction mixture was heated to refluxed temperature and stirred for 2 h, and then additional AIBN (218 mg, 1.22 mmol) was added to the reaction mixture at room temperature. After addition was completed, the reaction mixture was stirred for 1 h at refluxed temperature. After being cooled to room temperature, the reaction mixture was poured into water (100 mL) and extracted with Et<sub>2</sub>O (100 mL × 3). The organic layer was washed with brine (50 mL), dried over MgSO<sub>4</sub> and concentrated *in vacuo*. The crude product was passed through a short pad of silica gel (eluent: hexane/Et<sub>2</sub>O = 3/1, v/v) to give a pale yellow solid (15.1 g, 25.8 mmol, 97% yield). This crude product was directly used for the following reaction without further purification. The analytical data of **6** was obtained by the purification of the crude product by flash column chromatography on silica gel (eluent: hexane/Et<sub>2</sub>O = 5/1 to 3/1, v/v) as a pale yellow solid.

<sup>1</sup>H NMR (400 MHz, CDCl<sub>3</sub>) δ 8.66 (s, 2H), 8.01 (d, *J* = 8.5 Hz, 2H), 7.56 (ddd, *J* = 8.5, 7.2, 1.0 Hz, 2H), 7.36 (ddd, *J* = 8.5, 7.2, 1.6 Hz, 2H), 7.02 (d, *J* = 7.2 Hz, 2H), 4.80 (d, *J* = 9.8 Hz, 2H), 4.66 (d, *J* = 9.8 Hz, 2H), 4.52 (q, *J* = 7.2 Hz, 4H), 1.51 (t, *J* = 7.2 Hz, 6H); <sup>13</sup>C NMR (100 MHz, CDCl<sub>3</sub>) δ 167.2, 135.8, 133.5, 133.4, 133.2, 132.1, 129.0, 128.9, 128.4, 127.7, 127.1, 61.7, 30.0, 14.2; IR (KBr) 2980, 1716, 1425, 1242, 1057, 800, 752 cm<sup>-1</sup>; [α]<sup>23</sup><sub>D</sub> -48.9 (*c* 0.64, CH<sub>2</sub>Cl<sub>2</sub>, (*S*)-configuration) [lit.<sup>6</sup> [α]<sup>24</sup><sub>D</sub> +96.7 (*c* 0.64, CH<sub>2</sub>Cl<sub>2</sub>, (*R*)-configuration)].

### Synthesis of 7

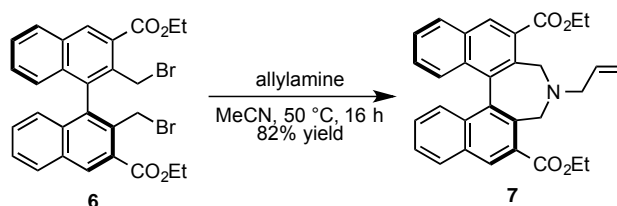

### (*S*)-Diethyl 4-allyl-4,5-dihydro-3H-dinaphtho[2,1-c:1',2'-e]azepine-2,6-dicarboxylate (**7**)<sup>6</sup>

To a solution of **6**<sup>3</sup> (23.4 g, 40.0 mmol) in MeCN (400 mL) was added allylamine (8.90 mL, 119 mmol) at 0 °C. The reaction mixture was heated to 50 °C and stirred for 16 h, then poured into water (300 mL). The resulting solution was extracted with CH<sub>2</sub>Cl<sub>2</sub> (100 mL × 3). The organic layer was dried over MgSO<sub>4</sub> and concentrated *in vacuo*. The purification of the crude product by flash column chromatography on silica gel (eluent: hexane/EtOAc = 9/2, v/v) gave **7** (15.7 g, 32.7 mmol, 82% yield) as a colorless foam.

<sup>1</sup>H NMR (400 MHz, CDCl<sub>3</sub>) δ 8.58 (s, 2H), 8.03 (d, *J* = 8.0 Hz, 2H), 7.50 (t, *J* = 8.0 Hz, 2H), 7.32 (t, *J* = 8.0 Hz, 2H), 7.24 (d, *J* = 8.0 Hz, 2H), 6.05-5.90 (m, 1H), 5.18-5.08 (m, 2H), 4.80 (d, *J* = 12.9 Hz, 2H), 4.53 (q, *J* = 7.1 Hz, 4H), 3.30 (dd, *J* = 13.1, 5.6 Hz, 1H), 3.01-2.89 (m, 3H), 1.49 (td, *J* = 7.1, 2.1 Hz, 6H); <sup>13</sup>C NMR (100 MHz, CDCl<sub>3</sub>) δ 168.0, 136.9, 136.5, 132.7, 132.0, 131.7, 129.3, 128.8, 128.0, 127.2, 126.3, 117.1, 61.4, 58.9, 49.8, 14.4; IR (KBr) 2979, 2790, 1721, 1443, 1241, 1204, 1056, 754 cm<sup>-1</sup>; [α]<sub>D</sub><sup>22</sup> +202.6 (*c* 1.00, CH<sub>2</sub>Cl<sub>2</sub>, (*S*)-configuration) (lit.<sup>6</sup> [α]<sub>D</sub><sup>27</sup> -431.5 [*c* 1.0, CH<sub>2</sub>Cl<sub>2</sub>, (*R*)-configuration]).

### Synthesis of **8**

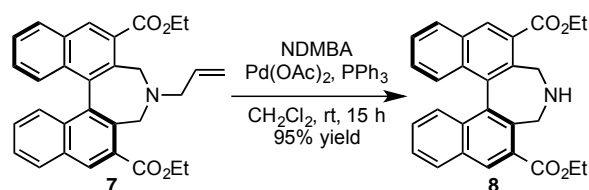

### (*S*)-Diethyl 4,5-dihydro-3H-dinaphtho[2,1-*c*:1',2'-*e*]azepine-2,6-dicarboxylate (**8**)

To a solution of **7**<sup>6</sup> (15.7 g, 32.7 mmol), NDMBA (10.3 g, 66.0 mmol) and Ph<sub>3</sub>P (1.84 g, 7.02 mmol) in CH<sub>2</sub>Cl<sub>2</sub> (110 mL) was added Pd(OAc)<sub>2</sub> (377 mg, 1.68 μmol) at room temperature. The reaction mixture was stirred for 15 h at room temperature, then water (100 mL) was added. The resulting solution was extracted with CH<sub>2</sub>Cl<sub>2</sub> (100 mL × 3). The organic layer was washed saturated aqueous NaHCO<sub>3</sub> (100 mL × 3), dried over MgSO<sub>4</sub> and concentrated *in vacuo*. The purification of the crude product by flash column chromatography on silica gel (eluent: EtOAc to EtOAc/MeOH = 30/1, v/v) gave **8** (13.7 g, 31.2 mmol, 95% yield) as a pale yellow foam.

<sup>1</sup>H NMR (400 MHz, CDCl<sub>3</sub>) δ 8.58 (s, 2H), 8.01 (d, *J* = 8.0 Hz, 2H), 7.49 (dt, *J* = 8.0, 1.2 Hz, 2H), 7.31 (dt, *J* = 8.0, 1.2 Hz, 2H), 7.42 (d, *J* = 8.0 Hz, 2H), 4.78 (d, *J* = 12.5 Hz, 2H), 4.48 (qd, *J* = 7.1, 3.1 Hz, 4H), 3.22 (d, *J* = 12.5 Hz, 2H), 2.41 (bs, 1H), 1.48 (t, *J* = 7.1 Hz, 6H); <sup>13</sup>C NMR (100 MHz, CDCl<sub>3</sub>) δ 168.1, 136.7, 133.6, 132.7, 132.2, 131.7, 129.4, 128.5, 128.0, 127.3, 126.3, 61.5, 44.0, 14.5; IR (KBr) 2984, 1722, 1242, 1137, 1053, 909, 773, cm<sup>-1</sup>; HRMS (FAB<sup>+</sup>) calculated for C<sub>28</sub>H<sub>26</sub>NO<sub>4</sub> [M+H]<sup>+</sup> 440.1856, found 440.1857; [α]<sub>D</sub><sup>20</sup> +433.4 (*c* 0.53, CH<sub>2</sub>Cl<sub>2</sub>, (*S*)-configuration).

### Synthesis of **1e**

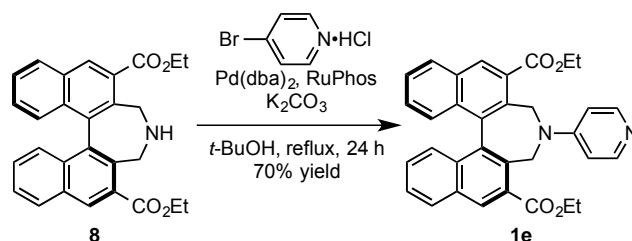

### (*S*)-Diethyl 4-(pyridin-4-yl)-4,5-dihydro-3H-dinaphtho[2,1-*c*:1',2'-*e*]azepine-2,6-dicarboxylate (**1e**)

#### Small scale reaction (0.200 mmol scale)

To a suspension of **8** (87.9 mg, 0.200 mmol), 4-bromopyridine hydrochloride (77.7 mg, 0.400 mmol), RuPhos (7.70 mg, 16.5 μmol) and potassium carbonate (167 mg, 1.21 mmol) in *t*-BuOH (2.00 mL) was added Pd(dba)<sub>2</sub> (4.70 mg, 8.17 μmol) at room temperature. The reaction mixture was heated to refluxed

temperature and vigorously stirred for 24 h, and then water (3 mL) was added and filtered off. After filtrate was concentrated *in vacuo*, the resulting solution was extracted with CH<sub>2</sub>Cl<sub>2</sub> (5 mL × 3), dried over MgSO<sub>4</sub> and concentrated *in vacuo*. The purification of the crude product by flash column chromatography on silica gel (eluent: EtOAc + 3% Et<sub>3</sub>N) gave **1e** (80.0 mg, 0.155 mmol, 78% yield) as a pale yellow solid.

### Large scale reaction (31.2 mmol scale)

To a suspension of **8** (13.7 g, 31.2 mmol), 4-bromopyridine hydrochloride (12.2 g, 62.7 mmol), RuPhos (1.10 g, 2.36 mmol) and potassium carbonate (26.0 g, 188 mmol) in *t*-BuOH (313 mL) was added Pd(dba)<sub>2</sub> (721 mg, 1.25 mmol) at room temperature. The reaction mixture was heated to refluxed temperature and vigorously stirred for 24 h, and then water (100 mL) was added and filtered off. After filtrate was concentrated *in vacuo*, the resulting solution was extracted with CH<sub>2</sub>Cl<sub>2</sub> (100 mL × 3), dried over MgSO<sub>4</sub> and concentrated *in vacuo*. The purification of the crude product by flash column chromatography on silica gel (eluent: EtOAc + 3% Et<sub>3</sub>N) gave **1e** (11.2 g, 21.7 mmol, 70% yield) as a pale yellow solid.

<sup>1</sup>H NMR (400 MHz, CDCl<sub>3</sub>) δ 8.60 (s, 2H), 8.22 (d, *J* = 5.7 Hz, 2H), 8.04 (d, *J* = 7.9 Hz, 2H), 7.55 (t, *J* = 7.9 Hz, 2H), 7.37 (t, *J* = 7.9 Hz, 2H), 7.31 (d, *J* = 7.9 Hz, 2H), 6.78 (d, *J* = 5.7 Hz, 2H), 5.95 (d, *J* = 13.1 Hz, 2H), 4.46-4.32 (m, 4H), 3.53 (d, *J* = 13.1 Hz, 2H), 1.37 (t, *J* = 7.1 Hz, 6H); <sup>13</sup>C NMR (100 MHz, CDCl<sub>3</sub>) δ 168.0, 153.5, 150.1, 137.0, 132.8, 132.7, 132.0, 131.2, 129.6, 128.6, 128.1, 127.4, 127.0, 109.1, 61.9, 44.3, 14.4; IR (KBr) 2963, 2501, 2352, 1972, 1726, 986, 754, 588 cm<sup>-1</sup>; HRMS (FAB<sup>+</sup>) calculated for C<sub>33</sub>H<sub>29</sub>N<sub>2</sub>O<sub>4</sub> [M+H]<sup>+</sup> 517.2121, found 517.2099; mp 195.5–196.6 °C; [α]<sub>D</sub><sup>19</sup> -388.9 (*c* 0.53, CH<sub>2</sub>Cl<sub>2</sub>, (*S*)-configuration).

### Synthesis of **1f**

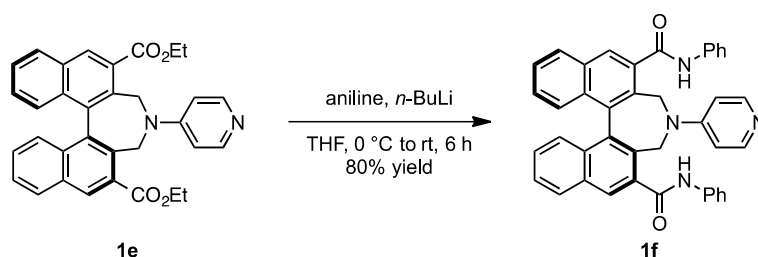

### (*S*)-*N*<sup>2</sup>,*N*<sup>6</sup>-diphenyl-4-(pyridin-4-yl)-4,5-dihydro-3*H*-dinaphtho[2,1-*c*:1',2'-*e*]azepine-2,6-dicarboxamide (**1f**)

To a solution of aniline (7.30 μL, 80.1 μmol) in THF (0.145 mL) was added a solution of *n*-BuLi in hexane (1.62 M, 99.0 μL, 160 μmol) at 0 °C. The reaction mixture was warmed up to room temperature and stirred for 1 h. After re-cooling to 0 °C, solution of **1e** (8.30 mg, 16.1 μmol) in THF (0.290 mL) was added dropwise to reaction mixture. The reaction mixture was warmed up to room temperature and stirred for 6 h. Then, the reaction mixture was poured into water (1 mL) and extracted with EtOAc (3 mL × 3). The organic layer was dried over MgSO<sub>4</sub> and concentrated *in vacuo*. The purification of the crude product by flash column chromatography on silica gel (eluent: EtOAc) gave **1f** (7.80 mg, 12.8 μmol, 80% yield) as a pale brown solid.

<sup>1</sup>H NMR (400 MHz, CDCl<sub>3</sub>) δ 8.68 (bs, 2H), 8.23 (s, 2H), 7.93 (d, *J* = 7.6 Hz, 2H), 7.59–7.21 (m, 14H), 7.11 (t, *J* = 7.2 Hz, 2H), 6.45 (d, *J* = 5.6 Hz, 2H), 5.28 (d, *J* = 13.2 Hz, 2H), 3.53 (d, *J* = 13.2 Hz, 2H), 2.44 (bs, 2H); <sup>13</sup>C NMR (100 MHz, CDCl<sub>3</sub>) δ 167.7, 153.4, 149.1, 137.9, 136.9, 134.4, 132.2, 131.8, 129.7, 129.2, 129.1, 129.0, 128.1, 127.5, 127.3, 125.0, 120.3, 109.4, 77.4, 45.9; IR (KBr) 3055, 2924, 1645, 1597, 1533, 1437, 1319, 1250, 901, 752 cm<sup>-1</sup>; HRMS (EI<sup>+</sup>) calculated for C<sub>41</sub>H<sub>30</sub>N<sub>4</sub>O<sub>2</sub> [M]<sup>+</sup> 610.2363, found 610.2390; mp >280 °C; [α]<sub>D</sub><sup>25</sup> -208.0 (*c* 0.29, CHCl<sub>3</sub>, (*S*)-configuration).

## Synthesis of 1g

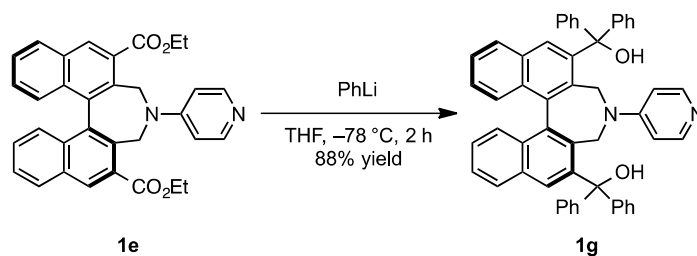

### (*S*)-2,6-bis(hydroxydiphenylmethyl)-4-(pyridin-4-yl)-4,5-dihydro-3*H*-dinaphtho[2,1-*c*:1',2'-*e*]azepine (**1g**)

To a solution of **1e** (103 mg, 0.200 mmol) in THF (2.00 mL) was added a solution of PhLi in *n*-Bu<sub>2</sub>O (1.6 M, 750  $\mu$ L, 1.20 mmol) at  $-78\text{ }^{\circ}\text{C}$ . The reaction mixture was stirred for 2 h at  $-78\text{ }^{\circ}\text{C}$ . Then, water (30 mL) was added to reaction mixture and extracted with CHCl<sub>3</sub> (10 mL  $\times$  3). The organic layer was washed with brine (10 mL  $\times$  3), dried over MgSO<sub>4</sub> and concentrated *in vacuo*. The purification of the crude product by recrystallization from CHCl<sub>3</sub>/Et<sub>2</sub>O gave **1g** (130 mg, 0.176 mmol, 88% yield) as a colorless solid.

<sup>1</sup>H NMR (400 MHz, CDCl<sub>3</sub>)  $\delta$  7.77 (d, *J* = 6.0 Hz, 2H), 7.64 (d, *J* = 8.4 Hz, 2H), 7.49–7.17 (m, 18H), 7.15–6.95 (m, 10H), 5.91 (d, *J* = 6.0 Hz, 2H), 5.23 (d, *J* = 13.2 Hz, 2H), 3.40 (d, *J* = 13.2 Hz, 2H), 3.34 (bs, 1H); <sup>13</sup>C NMR (150 MHz, CDCl<sub>3</sub>)  $\delta$  152.9, 147.9, 147.6, 145.6, 142.5, 138.3, 132.3, 131.6, 131.2, 130.7, 128.8, 128.3, 127.9, 127.8, 127.5, 127.4, 127.2, 126.6, 126.2, 108.7, 83.2, 45.6; IR (KBr) 3057, 1597, 1447, 1396, 1242, 997, 748, 696 cm<sup>-1</sup>; HRMS (ESI<sup>+</sup>) calculated for C<sub>53</sub>H<sub>41</sub>N<sub>2</sub>O<sub>2</sub> [M+H]<sup>+</sup> 737.3163, found 737.3130; mp >280  $^{\circ}\text{C}$ ; [ $\alpha$ ]<sub>D</sub><sup>19</sup>  $-260.5$  (*c* 0.27, CHCl<sub>3</sub>, (*S*)-configuration).

## Synthesis of 1h

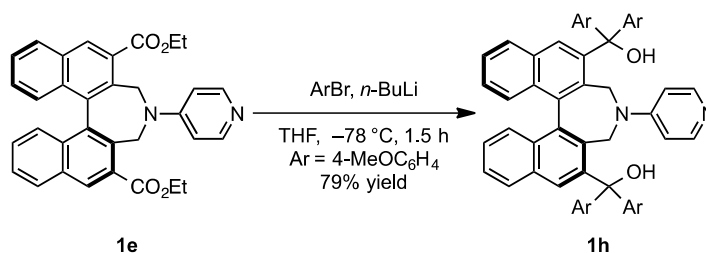

### (*S*)-2,6-bis(bis(4-methoxyphenyl)(hydroxy)methyl)-4-(pyridin-4-yl)-4,5-dihydro-3*H*-dinaphtho[2,1-*c*:1',2'-*e*]azepine (**1h**)

To a solution of 4-bromoanisole (37.0  $\mu$ L, 0.300 mmol) in THF (0.250 mL) was added dropwise a solution of *n*-BuLi in hexane (1.60 M, 190  $\mu$ L, 0.304 mmol) for 1 min at  $-78\text{ }^{\circ}\text{C}$  and stirred for 20 min. After stirring for 20 min at  $-78\text{ }^{\circ}\text{C}$ , a solution of **1e** (25.7 mg, 49.7  $\mu$ mol) in THF (1.00 mL) was added to reaction mixture at  $-78\text{ }^{\circ}\text{C}$ . The reaction mixture was stirred for 1.5 h at  $-78\text{ }^{\circ}\text{C}$ . Then, additional solution of *n*-BuLi in hexane (1.60 M, 190  $\mu$ L, 0.304 mmol) was added to reaction mixture to destroy 1-bromobutane which was generated in the reaction. The reaction mixture was warmed up to room temperature and stirred for 1 h, and then water (20 mL) was added. The resulting solution was extracted with CHCl<sub>3</sub> (10 mL  $\times$  3), dried over MgSO<sub>4</sub> and concentrated *in vacuo*. The resulting solid was subsequently thoroughly washed with Et<sub>2</sub>O. After filtration and drying of the solid, **1h** (33.6 mg, 39.2  $\mu$ mol, 79% yield) was isolated as a pale yellow solid.

<sup>1</sup>H NMR (400 MHz, CDCl<sub>3</sub>)  $\delta$  7.68–7.56 (m, 4H), 7.36 (ddd, *J* = 7.9, 5.5, 2.5 Hz, 2H), 7.25–7.17 (m, 6H), 7.13 (d, *J* = 8.5 Hz, 4H), 6.91 (d, *J* = 8.5 Hz, 4H), 6.84 (d, *J* = 8.5 Hz, 4H), 6.47 (d, *J* = 8.5 Hz, 4H), 5.87 (d, *J* = 6.4 Hz, 2H), 5.35 (d, *J* = 13.2 Hz, 2H), 3.98 (bs, 1.4H), 3.80 (s, 6H), 3.60 (s, 6H), 3.37 (d, *J* = 13.2 Hz, 2H); <sup>13</sup>C NMR (100 MHz, CDCl<sub>3</sub>, 50  $^{\circ}\text{C}$ )  $\delta$  159.0, 158.8, 153.0, 147.8, 143.1, 140.7, 138.3, 138.3, 132.7, 131.7, 131.3, 130.5, 129.2, 128.9, 128.7, 127.5, 126.4, 126.1, 113.6, 113.1, 108.8, 82.8, 55.4, 55.1, 45.6; IR



(KBr) 2363, 1603, 1506, 1248, 1175, 1031, 993, 829, 750  $\text{cm}^{-1}$ ; HRMS (ESI<sup>+</sup>) calculated for  $\text{C}_{57}\text{H}_{49}\text{N}_2\text{O}_6$   $[\text{M}+\text{H}]^+$  857.3585, found 857.3546; mp 235 °C dec;  $[\alpha]_{\text{D}}^{24}$  -206.4 (*c* 0.29,  $\text{CHCl}_3$ , (*S*)-configuration).

### Synthesis of 1i

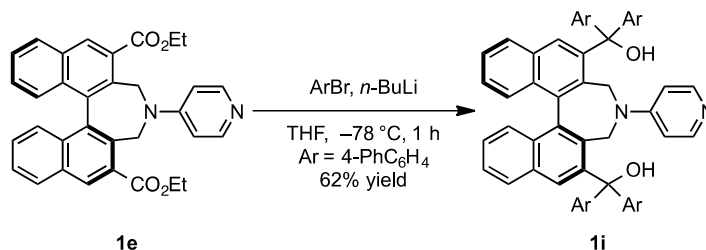

### (*S*)-2,6-bis(di([1,1'-biphenyl]-4-yl)(hydroxy)methyl)-4-(pyridin-4-yl)-4,5-dihydro-3*H*-dinaphtho[2,1-*c*:1',2'-*e*]azepine (**1i**)

To a solution of 4-bromobiphenyl (280 mg, 1.20 mmol) in THF (3.00 mL) was added dropwise a solution of *n*-BuLi in hexane (1.55 M, 775  $\mu\text{L}$ , 1.20 mmol) for 1 min at  $-78\text{ }^\circ\text{C}$  and stirred for 20 min. After stirring for 20 min at  $-78\text{ }^\circ\text{C}$ , a solution of **1e** (103 mg, 0.200 mmol) in THF (1.50 mL) was added to reaction mixture at  $-78\text{ }^\circ\text{C}$ . The reaction mixture was stirred for 1 h at  $-78\text{ }^\circ\text{C}$ . Then, additional solution of *n*-BuLi in hexane (1.55 M, 775  $\mu\text{L}$ , 1.20 mmol) was added to reaction mixture to destroy 1-bromobutane which was generated in the reaction. The reaction mixture was warmed up to room temperature and stirred for 1 h, and then water (20 mL) was added. The resulting mixture was extracted with  $\text{CHCl}_3$  (20 mL  $\times$  3), dried over  $\text{MgSO}_4$  and concentrated *in vacuo*. The purification of the crude product by flash column chromatography on silica gel (eluent:  $\text{CHCl}_3/\text{MeOH} = 30/1$ , v/v) gave **1i** (128 mg, 0.123 mmol, 62% yield) as a colorless solid.

$^1\text{H}$  NMR (400 MHz,  $\text{CDCl}_3$ )  $\delta$  7.69 (d,  $J = 7.8$  Hz, 2H), 7.64–7.54 (m, 10H), 7.47–7.54 (m, 36 H), 6.01 (d,  $J = 5.4$  Hz, 2H), 5.43 (d,  $J = 12.9$  Hz, 2H), 4.39 (bs, 1.2H), 3.46 (d,  $J = 12.9$  Hz, 2H);  $^{13}\text{C}$  NMR (100 MHz,  $\text{CDCl}_3$ )  $\delta$  153.2, 147.0, 145.0, 142.5, 140.5, 140.4, 140.1, 140.1, 138.4, 132.4, 131.7, 131.2, 130.6, 128.9, 128.9, 128.2, 127.6, 127.3, 127.2, 127.2, 127.0, 126.6, 126.5, 126.2, 108.9, 83.0, 45.8; IR (KBr) 3055, 3028, 1593, 1508, 1485, 1398, 1242, 995, 893, 837, 748  $\text{cm}^{-1}$ ; HRMS (ESI<sup>+</sup>) calculated for  $\text{C}_{77}\text{H}_{57}\text{N}_2\text{O}_2$   $[\text{M}+\text{H}]^+$  1041.4415, found 1041.4385; mp 257 °C dec;  $[\alpha]_{\text{D}}^{23}$  -172.6 (*c* 0.26,  $\text{CHCl}_3$ , (*S*)-configuration).

### Synthesis of 1j

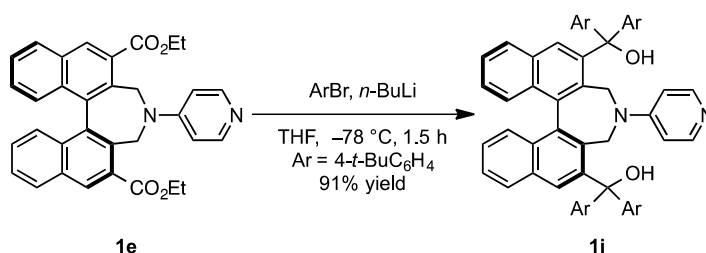

### (*S*)-2,6-bis(bis(4-(*tert*-butyl)phenyl)(hydroxy)methyl)-4-(pyridin-4-yl)-4,5-dihydro-3*H*-dinaphtho[2,1-*c*:1',2'-*e*]azepine (**1j**)

To a solution of 1-bromo-4-*tert*-butylbenzene (2.00 g, 9.38 mmol) in THF (9.75 mL) was added dropwise a solution of *n*-BuLi in hexane (1.63 M, 5.75 mL, 9.37 mmol) for 1 min at  $-78\text{ }^\circ\text{C}$  and stirred for 20 min. After stirring for 20 min at  $-78\text{ }^\circ\text{C}$ , a solution of **1e** (1.01 g, 1.96 mmol) in THF (19.5 mL) was added to reaction mixture at  $-78\text{ }^\circ\text{C}$ . The reaction mixture was stirred for 1 h at  $-78\text{ }^\circ\text{C}$ , then water (30 mL) was added. The resulting mixture was extracted with  $\text{CHCl}_3$  (75 mL  $\times$  3), dried over  $\text{MgSO}_4$  and concentrated *in vacuo*. The purification of the crude product by twice flash column chromatography on silica gel (eluent: EtOAc to EtOAc + 3%  $\text{Et}_3\text{N}$  and  $\text{Et}_2\text{O}$  to EtOAc to EtOAc + 3%  $\text{Et}_3\text{N}$ ) gave **1j** (1.71 g, 1.78 mmol, 91%

yield) as a pale yellow solid.

$^1\text{H}$  NMR (400MHz,  $\text{CDCl}_3$ )  $\delta$  7.77–7.62 (m, 6H), 7.49–6.97 (m, 22H), 6.37 (d,  $J = 7.2$  Hz, 2H), 5.58 (d,  $J = 13.2$  Hz, 2H), 3.60 (d,  $J = 13.2$  Hz, 2H), 1.32 (s, 18H), 1.26 (s, 18H);  $^{13}\text{C}$  NMR (150 MHz,  $\text{CDCl}_3$ )  $\delta$  153.0, 149.8, 149.8, 147.6, 145.2, 143.6, 143.2, 138.1, 132.7, 131.6, 131.1, 130.3, 128.8, 127.7, 127.5, 127.4, 126.2, 125.8, 125.0, 124.5, 108.6, 82.6, 45.5, 34.6, 34.4, 31.5, 31.5; IR (KBr) 2961, 1595, 1508, 1398, 1233, 1107, 993, 829, 748  $\text{cm}^{-1}$ ; HRMS (ESI $^+$ ) calculated for  $\text{C}_{69}\text{H}_{73}\text{N}_2\text{O}_2$   $[\text{M}+\text{H}]^+$  961.5667, found 961.5626; mp 231.0  $^\circ\text{C}$  dec;  $[\alpha]_{\text{D}}^{21} -280.4$  ( $c$  0.26,  $\text{CHCl}_3$ , (S)-configuration).

### Synthesis of 1k

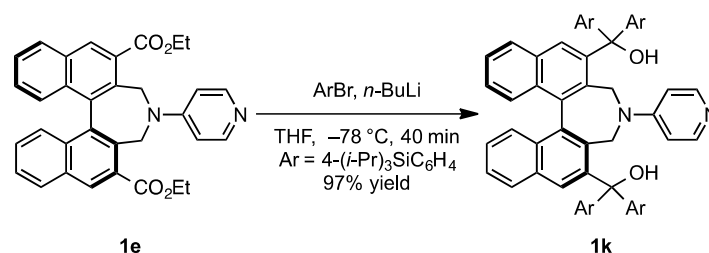

### (S)-2,6-bis(hydroxybis(4-(triisopropylsilyl)phenyl)methyl)-4-(pyridin-4-yl)-4,5-dihydro-3H-dinaphtho[2,1-c:1',2'-e]azepine (1k)

To a solution of 1-bromo-4-[tris(iso-propyl)silyl]-benzene<sup>14</sup> (175  $\mu\text{L}$ , 0.603 mmol) in THF (0.500 mL) was added dropwise a solution of *n*-BuLi in hexane (1.60 M, 375  $\mu\text{L}$ , 0.600 mmol) for 1 min at  $-78$   $^\circ\text{C}$  and stirred for 20 min. After stirring for 20 min at  $-78$   $^\circ\text{C}$ , a solution of **1e** (51.9 mg, 0.100 mmol) in THF (1.50 mL) was added to reaction mixture at  $-78$   $^\circ\text{C}$ . The reaction mixture was stirred for 40 min at  $-78$   $^\circ\text{C}$ . Then, additional solution of *n*-BuLi in hexane (1.60 M, 375  $\mu\text{L}$ , 0.600 mmol) was added to reaction mixture to destroy 1-bromobutane which was generated in the reaction. The reaction mixture was warmed up to room temperature and stirred for 1 h, and then water (20 mL) was added. The resulting mixture was extracted with  $\text{CHCl}_3$  (20 mL  $\times$  3), dried over  $\text{MgSO}_4$  and concentrated *in vacuo*. The purification of the crude product by flash column chromatography on silica gel (eluent:  $\text{CHCl}_3$  to  $\text{CHCl}_3/\text{MeOH} = 4/1$ , v/v) gave **1k** (132 mg, 96.9  $\mu\text{mol}$ , 97% yield) as a greenish yellow solid.

$^1\text{H}$  NMR (400MHz,  $\text{CDCl}_3$ )  $\delta$  7.87 (d,  $J = 6.0$  Hz, 2H), 7.53 (d,  $J = 8.0$  Hz, 2H), 7.50–7.35 (m, 12H), 7.33–7.23 (m, 8H), 7.19 (d,  $J = 8.0$  Hz, 2H), 7.08 (bs, 2H), 6.24 (bd,  $J = 6.0$  Hz, 2H), 5.26 (bd,  $J = 12.6$  Hz, 2H), 3.43 (bd,  $J = 12.6$  Hz, 2H), 1.50–1.30 (m, 12H), 1.16–0.96 (m, 72H);  $^{13}\text{C}$  NMR (100 MHz,  $\text{CDCl}_3$ )  $\delta$  153.7, 147.7, 146.9, 143.0, 138.2, 135.2, 134.9, 134.1, 132.2, 131.8, 131.2, 130.9, 128.8, 127.6, 127.3, 126.5, 126.4, 126.2, 109.2, 82.9, 46.2, 18.8, 10.9, 10.9; IR (KBr) 2943, 2864, 1595, 1464, 1242, 1101, 995, 883, 750  $\text{cm}^{-1}$ ; HRMS (ESI $^+$ ) calculated for  $\text{C}_{89}\text{H}_{121}\text{N}_2\text{O}_2\text{Si}_4$   $[\text{M}+\text{H}]^+$  1361.8500, found 1361.8480; mp 250  $^\circ\text{C}$  dec;  $[\alpha]_{\text{D}}^{24} -172.8$  ( $c$  0.29,  $\text{CHCl}_3$ , (S)-configuration).

## Synthesis of 11

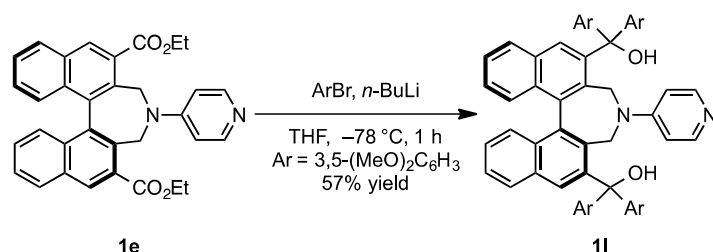

### (*S*)-2,6-bis(bis(3,5-dimethoxyphenyl)(hydroxy)methyl)-4-(pyridin-4-yl)-4,5-dihydro-3*H*-dinaphtho[2,1-*c*:1',2'-*e*]azepine (**11**)

To a solution of 1-bromo-3,5-dimethoxybenzene (522 mg, 2.40 mmol) in THF (2.00 mL) was added dropwise solution of *n*-BuLi in hexane (1.60 M, 1.50 mL, 2.40 mmol) for 1 min at  $-78\text{ }^\circ\text{C}$  and stirred for 20 min. After stirring for 20 min at  $-78\text{ }^\circ\text{C}$ , a solution of **1e** (207 mg, 0.400 mmol) in THF (2.50 mL) was added to reaction mixture at  $-78\text{ }^\circ\text{C}$ . The reaction mixture was stirred for 1 h at  $-78\text{ }^\circ\text{C}$ . Then, additional solution of *n*-BuLi in hexane (1.60 M, 1.50 mL, 2.40 mmol) was added to reaction mixture to destroy 1-bromobutane which was generated in the reaction. The reaction mixture was warmed up to room temperature and stirred for 1 h at room temperature, and then water (30 mL) was added. The resulting mixture was extracted with  $\text{CHCl}_3$  (30 mL  $\times$  3), dried over  $\text{MgSO}_4$  and concentrated *in vacuo*. The purification of the crude product by flash column chromatography on silica gel (eluent:  $\text{CHCl}_3/\text{MeOH} = 20/1 + 3\% \text{Et}_3\text{N}$ , v/v) gave **11** (224 mg, 0.229 mmol, 57% yield) as a colorless solid.

$^1\text{H}$  NMR (400 MHz,  $\text{CDCl}_3$ )  $\delta$  7.68 (d,  $J = 7.8$  Hz, 4H), 7.39 (ddd,  $J = 7.1, 3.8, 2.9$  Hz, 2H), 7.30 (s, 2H), 7.24–7.16 (m, 4H), 6.42 (s, 4H), 6.40 (s, 2H), 6.27 (s, 4H), 5.99–5.93 (m, 4H), 5.26 (d,  $J = 13.2$  Hz, 2H), 3.70 (s, 12H), 3.59 (s, 12H), 3.46 (d,  $J = 13.2$  Hz, 2H);  $^{13}\text{C}$  NMR (100 MHz,  $\text{CDCl}_3$ )  $\delta$  160.7, 160.4, 150.0, 147.5, 141.8, 138.2, 131.9, 131.7, 131.2, 130.7, 128.9, 127.4, 126.6, 126.2, 108.7, 106.6, 106.5, 99.4, 97.8, 83.3, 55.5, 55.2, 45.6; IR (KBr) 2935, 1597, 1458, 1204, 1155, 1057, 752  $\text{cm}^{-1}$ ; HRMS ( $\text{ESI}^+$ ) calculated for  $\text{C}_{61}\text{H}_{57}\text{N}_2\text{O}_{10}$   $[\text{M}+\text{H}]^+$  977.4008, found 977.3993; mp  $242\text{ }^\circ\text{C}$  dec;  $[\alpha]_D^{23}$   $-212.1$  ( $c$  0.28,  $\text{CHCl}_3$ , (*S*)-configuration).

## Synthesis of 1m

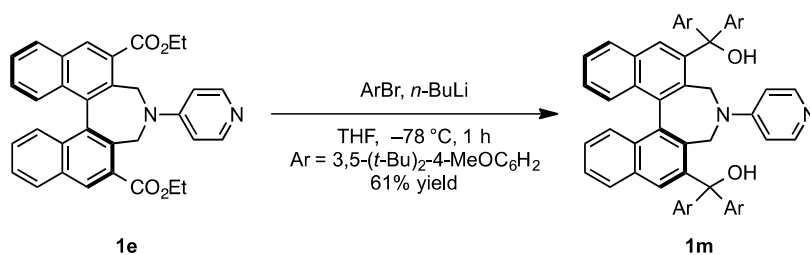

### (*S*)-2,6-bis(bis(4-(*tert*-butyl)-3,5-dimethoxyphenyl)(hydroxy)methyl)-4-(pyridin-4-yl)-4,5-dihydro-3*H*-dinaphtho[2,1-*c*:1',2'-*e*]azepine (**1m**)

To a solution of 4-bromo-2,6-di-*tert*-butylanisole<sup>15</sup> (178 mg, 0.595 mmol) in THF (1.00 mL) was added dropwise a solution of *n*-BuLi in hexane (1.60 M, 375  $\mu\text{L}$ , 0.600 mmol) for 1 min at  $-78\text{ }^\circ\text{C}$  and stirred for 20 min. After stirring for 20 min at  $-78\text{ }^\circ\text{C}$ , a solution of **1e** (51.7 mg, 0.100 mmol) in THF (1.50 mL) was added to the reaction mixture at  $-78\text{ }^\circ\text{C}$ . The reaction mixture was stirred for 1 h at  $-78\text{ }^\circ\text{C}$ . Then, additional solution of *n*-BuLi in hexane (1.60 M, 375  $\mu\text{L}$ , 0.600 mmol) was added to reaction mixture to destroy 1-bromobutane which was generated in the reaction. The reaction mixture was warmed up to room temperature and stirred for 1 h, and then water (10 mL) was added. The resulting mixture was extracted with  $\text{CHCl}_3$  (20 mL  $\times$  3), dried over  $\text{MgSO}_4$  and concentrated *in vacuo*. The purification of the crude product by

flash column chromatography on silica gel (eluent: Et<sub>2</sub>O/MeOH = 30/1, v/v) gave **1m** (80.1 mg, 61.3 μmol, 61% yield) as a pale yellow solid.

<sup>1</sup>H NMR (600 MHz, CDCl<sub>3</sub>) δ 7.82 (bd, *J* = 5.4 Hz, 2H), 7.64 (d, *J* = 7.5 Hz, 2H), 7.32 (t, *J* = 7.5 Hz, 2H), 7.23-6.85 (m, 14H), 6.35 (bd, *J* = 5.4 Hz, 2H), 5.30 (d, *J* = 13.2 Hz, 2H), 3.67 (s, 6H), 6.03 (s, 6H), 3.33 (d, *J* = 13.2 Hz, 2H), 3.02 (bs, 1H), 2.94 (bs, 1H), 1.30 (s, 36H), 1.22 (s, 36H); <sup>13</sup>C NMR (150 MHz, CDCl<sub>3</sub>) δ 158.7, 158.7, 143.2, 143.0, 143.0, 141.4, 140.2, 138.4, 131.8, 131.0, 130.4, 128.8, 127.2, 127.0, 126.5, 126.4, 125.7, 124.1, 109.2, 83.0, 64.4, 64.3, 46.7, 36.0 (2), 32.3, 32.2; IR (KBr) 2961, 1645, 1595, 1539, 1227, 1115, 1012, 887, 748 cm<sup>-1</sup>; HRMS (ESI<sup>+</sup>) calculated for C<sub>89</sub>H<sub>113</sub>N<sub>2</sub>O<sub>6</sub> [M+H]<sup>+</sup> 1305.8593, found 1305.8599; mp 202 °C dec; [α]<sub>D</sub><sup>22</sup> -218.6 (*c* 0.26, CHCl<sub>3</sub>, (*S*)-configuration).

### Synthesis of **1j'**

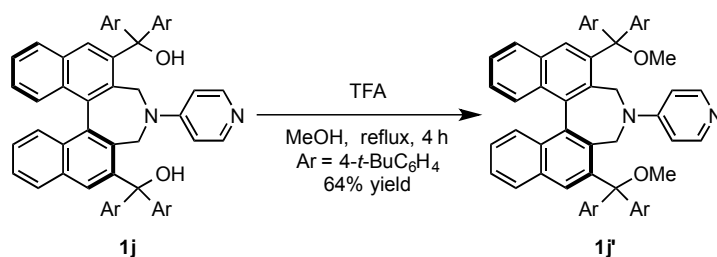

### (*S*)-2,6-bis(bis(4-(*tert*-butyl)phenyl)(methoxy)methyl)-4-(pyridin-4-yl)-4,5-dihydro-3*H*-dinaphtho[2,1-*c*:1',2'-*e*]azepine (**1j'**)

To a solution of **1j** (172 mg, 0.179 mmol) in MeOH (2.00 mL) was added trifluoroacetic acid [TFA] (89.2 μL, 1.20 mmol) at room temperature. The reaction mixture was heated to refluxed temperature and stirred for 4 h, and then 2 M aqueous NaOH (5 mL) was added. The resulting mixture was extracted with CH<sub>2</sub>Cl<sub>2</sub> (5 mL × 3), dried over MgSO<sub>4</sub> and concentrated in *vacuo*. The purification of the crude product by flash column chromatography on silica gel (eluent: hexane/EtOAc = 1/1, v/v) gave **1j'** (113 mg, 0.114 mmol, 64% yield) as a pale yellow solid.

<sup>1</sup>H NMR (400 MHz, CDCl<sub>3</sub>) δ 8.13 (s, 2H), 8.09 (d, *J* = 5.4 Hz, 2H), 7.86 (d, *J* = 8.1 Hz, 2H), 7.49 (ddd, *J* = 8.1, 5.5, 2.5 Hz, 2H), 7.39–7.22 (m, 16H), 7.19 (d, *J* = 8.0 Hz, 4H), 6.08 (d, *J* = 5.4 Hz, 2H), 5.02 (d, *J* = 12.8 Hz, 2H), 3.12 (d, *J* = 12.8 Hz, 2H), 2.79 (s, 6H), 1.29 (s, 18H), 1.24 (s, 18H); <sup>13</sup>C NMR (100 MHz, CDCl<sub>3</sub>, 40 °C) δ 153.5, 149.5, 149.4, 149.0, 144.5, 140.3, 138.3, 138.2, 133.1, 132.1, 131.7, 131.5, 128.9, 128.1, 127.5, 126.7, 126.4, 126.1, 125.0, 124.8, 109.1, 87.8, 53.0, 45.1, 34.5, 31.5; IR (KBr) 2961, 1591, 1508, 1244, 1074, 750 cm<sup>-1</sup>; HRMS (ESI<sup>+</sup>) calculated for C<sub>71</sub>H<sub>77</sub>N<sub>2</sub>O<sub>2</sub> [M+H]<sup>+</sup> 989.5980, found 989.5981; mp 221 °C dec; [α]<sub>D</sub><sup>24</sup> -78.7 (*c* 0.26, CHCl<sub>3</sub>, (*S*)-configuration).

## An overview for synthesis of catalyst **1n**

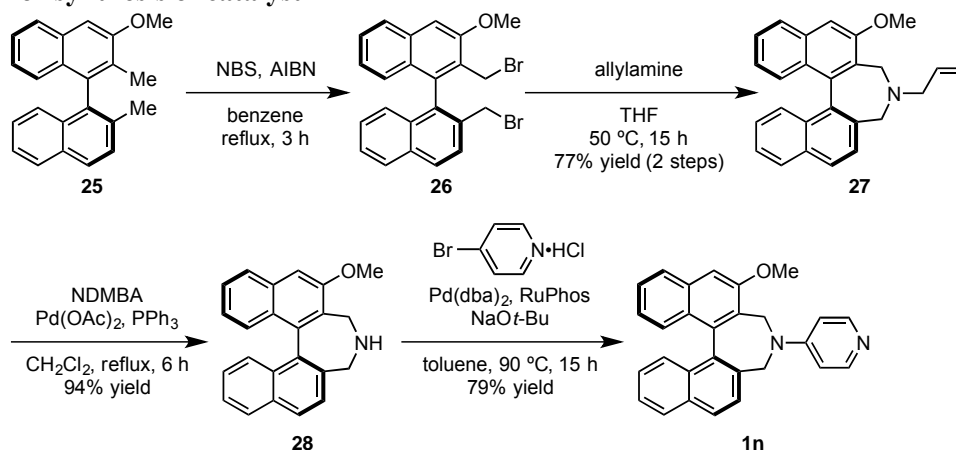

## Synthesis of **27**

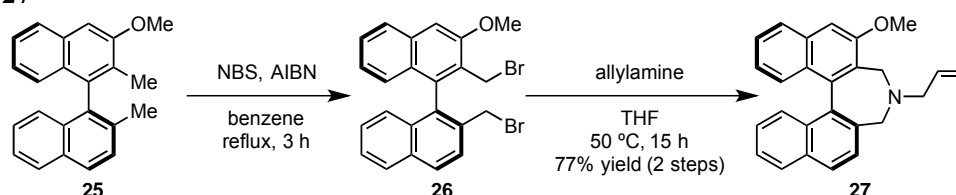

## (*S*)-4-allyl-2-methoxy-4,5-dihydro-3*H*-dinaphtho[2,1-*c*:1',2'-*e*]azepine (**27**)

To a suspension of **25**<sup>7</sup> (4.45 g, 14.3 mmol), NBS (5.58 g, 31.3 mmol) in benzene (71.0 mL) was added AIBN (234 mg, 1.43 mmol) at room temperature. The reaction mixture was heated to refluxed temperature and stirred for 3 h. After being cooled to room temperature, the reaction mixture was poured into water (100 mL) and extracted with EtOAc (100 mL × 3). The organic layer was washed with brine (50 mL × 3), dried over MgSO<sub>4</sub> and concentrated *in vacuo* to give the crude product of **26** (7.58 g) as a colorless solid. This crude product was directly used for the following reaction without further purification.

To a solution of **26** (4.03 g, 8.57 mmol) in THF (28.0 mL) was added allylamine (2.12 mL, 28.3 mmol) at room temperature. The reaction mixture was heated to 50 °C and stirred for 15 h. After being cooled to room temperature, the reaction mixture was poured into water (50 mL). The resulting solution was extracted with toluene (30 mL × 3) and the organic layer was washed with water (10 mL × 3), dried over MgSO<sub>4</sub> and concentrated *in vacuo*. The purification of the crude product by flash column chromatography on silica gel (eluent: hexane/EtOAc = 5/1 to 2/1 to 1/1, v/v) gave **27** (2.12 g, 5.80 mmol, 77% yield based on **23**) as a pale yellow foam.

<sup>1</sup>H NMR (600 MHz, CDCl<sub>3</sub>) δ 7.99 (t, *J* = 8.1 Hz, 2H), 7.89 (d, *J* = 7.8 Hz, 1H), 7.60 (d, *J* = 7.8 Hz, 1H), 7.56 (d, *J* = 9.0 Hz, 1H), 7.51–7.41 (m, 3H), 7.35 (s, 1H), 7.30 (bt, *J* = 7.8 Hz, 1H), 7.15 (bt, *J* = 7.8 Hz, 1H), 6.15–6.05 (m, 1H), 5.31 (d, *J* = 17.4 Hz, 1H), 5.26 (d, *J* = 9.6 Hz, 1H), 4.46 (d, *J* = 12.6 Hz, 1H), 4.06 (s, 3H), 3.82 (d, *J* = 12.3 Hz, 1H), 3.30–3.22 (m, 2H), 3.12 (dd, *J* = 13.2, 6.0 Hz, 1H), 2.88 (d, *J* = 12.6 Hz, 1H); <sup>13</sup>C NMR (150 MHz, CDCl<sub>3</sub>) δ 155.5, 137.2, 136.4, 134.9, 134.1, 133.6, 133.1, 131.4, 128.4, 128.3, 127.8, 127.6, 127.5, 127.1, 126.9, 126.1, 126.0, 125.8, 125.4, 123.4, 117.7, 105.5, 58.8, 55.5, 55.0, 46.6; IR (KBr) 3069, 2807, 1508, 1334, 752; HRMS (FAB<sup>+</sup>) calculated for C<sub>26</sub>H<sub>24</sub>NO [M+H]<sup>+</sup> 366.1852, found 366.1848; [α]<sub>D</sub><sup>23</sup> +375.9 (*c* 1.18, CHCl<sub>3</sub>, (*S*)-configuration).

## Synthesis of 28

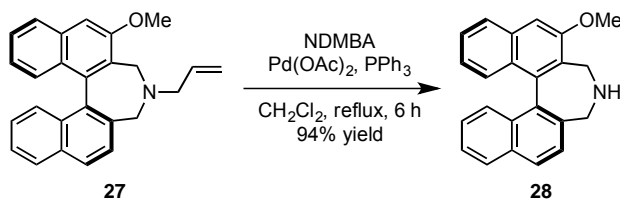

### (S)-2-methoxy-4,5-dihydro-3H-dinaphtho[2,1-c:1',2'-e]azepine (**28**)

To a solution of **27** (2.12 g, 5.80 mmol), NDMBA (2.72 g, 17.4 mmol) and PPh<sub>3</sub> (122 mg, 0.460 mmol) in CH<sub>2</sub>Cl<sub>2</sub> (29.0 mL) was added Pd(OAc)<sub>2</sub> (26.0 mg, 0.115 mmol) at room temperature. The reaction mixture was heated to refluxed temperature, and stirred for 6 h. After being cooled to room temperature, the reaction mixture was added saturated aqueous NaHCO<sub>3</sub> (20 mL). The resulting solution was extracted with CH<sub>2</sub>Cl<sub>2</sub> (30 mL × 3). The organic layer was washed with saturated aqueous NaHCO<sub>3</sub> (20 mL × 3), dried over MgSO<sub>4</sub> and concentrated *in vacuo*. The purification of the crude product by flash column chromatography on silica gel (eluent: EtOAc +1% Et<sub>3</sub>N to EtOAc/MeOH = 10/1 to 1/1, v/v) gave **28** (1.77 g, 5.43 mmol, 94% yield) as a pale yellow foam.

<sup>1</sup>H NMR (600 MHz, CDCl<sub>3</sub>) δ 7.97 (d, *J* = 8.4 Hz, 1H), 7.94 (dd, *J* = 7.5, 1.5 Hz, 1H), 7.84 (bd, *J* = 8.4 Hz, 1H), 7.59 (d, *J* = 8.4 Hz, 1H), 7.48–7.43 (m, 2H), 7.42 (ddd, *J* = 8.1, 6.8, 1.4 Hz, 1H), 7.32 (bd, *J* = 8.4 Hz, 1H), 7.30 (s, 1H), 7.28–7.25 (m, 1H), 7.11 (ddd, *J* = 8.1, 6.8, 1.4 Hz, 1H), 4.53 (d, *J* = 12.9 Hz, 1H), 4.02 (s, 3H), 3.90 (d, *J* = 12.0 Hz, 1H), 3.53 (d, *J* = 12.0 Hz, 1H), 3.09 (d, *J* = 12.9 Hz, 1H), 2.60 (bs, 1H); <sup>13</sup>C NMR (150 MHz, CDCl<sub>3</sub>) δ 154.9, 137.1, 135.0, 134.3, 134.2, 133.3, 131.5, 129.2, 128.4, 127.6, 127.5, 127.3, 127.2, 126.9, 126.6, 126.2, 126.0, 125.6, 123.6, 106.1, 55.6, 48.4, 39.6; IR (KBr) 3060, 3002, 2956, 2362, 1951, 1596, 1288, 752 cm<sup>-1</sup>; HRMS (FAB<sup>+</sup>) calculated for C<sub>23</sub>H<sub>20</sub>NO [M+H]<sup>+</sup> 326.1539, found 326.1555; [α]<sub>D</sub><sup>21</sup> +413.3 (*c* 1.14, CHCl<sub>3</sub>, (*S*)-configuration).

## Synthesis of 1n

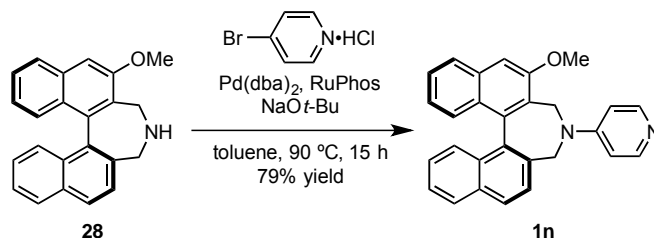

### (S)-2-methoxy-4-(pyridin-4-yl)-4,5-dihydro-3H-dinaphtho[2,1-c:1',2'-e]azepine (**1n**)

To a suspension of **28** (1.66 g, 5.06 mmol), 4-bromopyridine hydrochloride (1.97 g, 10.1 mmol), RuPhos (94.0 mg, 0.201 mmol) and NaOt-Bu (1.95 g, 20.2 mmol) in toluene (25.0 mL) was added Pd(dba)<sub>2</sub> (57.0 mg, 99.1 μmol) at room temperature. The reaction mixture was heated to 90 °C and vigorously stirred for 15 h. Then, the reaction mixture was added water (30 mL) and filtered through celite. The filtrate was extracted with toluene (30 mL × 3), washed with brine (20 mL × 3), dried over MgSO<sub>4</sub> and concentrated *in vacuo*. The purification of the crude product by flash column chromatography on silica gel (eluent: EtOAc to CH<sub>2</sub>Cl<sub>2</sub> to CH<sub>2</sub>Cl<sub>2</sub>/MeOH = 2/1, v/v) gave **1n** (1.61 g, 4.00 mmol, 79% yield) as a pale brown solid.

<sup>1</sup>H NMR (600 MHz, CDCl<sub>3</sub>) δ 8.27 (dd, *J* = 5.3, 1.7 Hz, 2H), 7.95 (dd, *J* = 8.1, 2.1 Hz, 2H), 7.84 (d, *J* = 8.4 Hz, 1H), 7.55–7.47 (m, 3H), 7.45 (ddd, *J* = 8.1, 6.9, 1.2 Hz, 1H), 7.39 (d, *J* = 8.4 Hz, 1H), 7.31 (ddd, *J* = 8.4, 7.1, 1.4 Hz, 1H), 7.28 (s, 1H), 7.15 (ddd, *J* = 8.4, 7.1, 1.4 Hz, 1H), 6.79 (dd, *J* = 5.3, 1.7 Hz, 2H), 5.40 (d, *J* = 13.2 Hz, 1H), 4.59 (d, *J* = 12.6 Hz, 1H), 3.95 (s, 3H), 3.78 (d, *J* = 12.6 Hz, 1H), 3.41 (d, *J* = 13.2 Hz, 1H); <sup>13</sup>C NMR (150 MHz, CDCl<sub>3</sub>) δ 154.7, 153.6, 150.1, 137.0, 135.2, 134.3, 133.4, 132.9, 131.5, 129.4, 128.4,

127.7, 127.6 (2), 127.3, 126.8, 126.6, 126.3, 126.1, 125.6, 123.9, 108.7, 106.3, 55.8, 50.8, 41.3; IR (KBr) 3047, 2363, 1595, 1507, 752; HRMS (FAB<sup>+</sup>) calculated for C<sub>28</sub>H<sub>23</sub>N<sub>2</sub>O [M+H]<sup>+</sup> 403.1804, found 403.1796; mp 223.7–224.6 °C; [α]<sub>D</sub><sup>23</sup> –338.4 (c 1.11, CHCl<sub>3</sub>, (S)-configuration).

### An overview for synthesis of catalyst **1o**

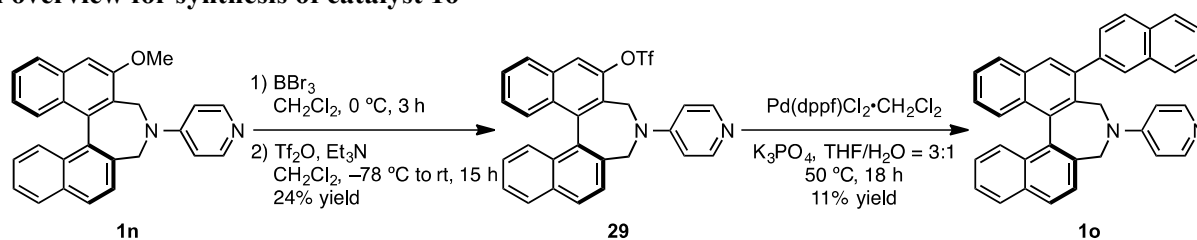

### Synthesis of **29**

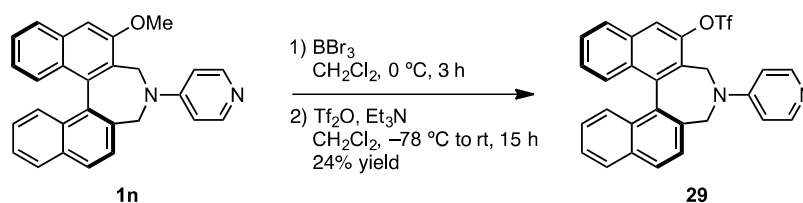

### (S)-4-(pyridin-4-yl)-4,5-dihydro-3H-dinaphtho[2,1-c:1',2'-e]azepin-2-yl trifluoromethanesulfonate (**29**)

To a solution of **1n** (256 mg, 0.636 mmol) in CH<sub>2</sub>Cl<sub>2</sub> (6.40 mL) was added a solution of BBr<sub>3</sub> in CH<sub>2</sub>Cl<sub>2</sub> (1.00 M, 1.50 mL, 1.50 mmol) at 0 °C. The reaction mixture was stirred for 3 h at 0 °C, then poured into MeOH (10 mL) and concentrated *in vacuo*. The residue was dissolved in CH<sub>2</sub>Cl<sub>2</sub> (6.40 mL) and Et<sub>3</sub>N (0.270 mL, 1.92 mmol) was added. To this solution was added Tf<sub>2</sub>O (0.130 mL, 0.773 mmol) at –78 °C. The reaction mixture was warmed up to room temperature and stirred for 15 h, then water (15 mL) was added. The resulting solution was extracted with CH<sub>2</sub>Cl<sub>2</sub> (15 mL × 3), washed with saturated aqueous NaHCO<sub>3</sub> (20 mL × 3), dried over MgSO<sub>4</sub> and concentrated *in vacuo*. The purification of the crude product by flash column chromatography on silica gel (eluent: EtOAc/MeOH = 50/1, v/v) gave **29** (80.2 mg, 0.154 mmol, 24% yield) as a pale yellow foam.

<sup>1</sup>H NMR (600 MHz, CDCl<sub>3</sub>) δ 8.31 (d, *J* = 6.3 Hz, 2H), 8.04 (d, *J* = 8.4 Hz, 1H), 8.00 (t, *J* = 6.6 Hz, 2H), 7.95 (s, 1H), 7.62 (t, *J* = 6.6 Hz, 1H), 7.59–7.51 (m, 3H), 7.44 (d, *J* = 8.4 Hz, 1H), 7.42–7.35 (m, 2H), 6.81 (d, *J* = 6.3 Hz, 2H), 5.15 (d, *J* = 13.5 Hz, 1H), 4.68 (d, *J* = 12.6 Hz, 1H), 3.82 (d, *J* = 12.6 Hz, 1H), 3.69 (d, *J* = 13.5 Hz, 1H); <sup>13</sup>C NMR (150 MHz, CDCl<sub>3</sub>) δ 153.0, 150.0, 144.6, 139.1, 133.4, 133.3, 132.9, 132.7, 131.0, 130.4, 130.2, 128.5, 127.8, 127.7, 127.4, 127.2, 127.0, 126.7, 126.3, 125.7, 120.2, 118.6 (q, *J* = 319.0 Hz), 108.6, 50.3, 42.5; IR (KBr) 1593, 1508, 1421, 1215, 810, 752 cm<sup>-1</sup>; HRMS (FAB<sup>+</sup>) calculated for C<sub>28</sub>H<sub>20</sub>F<sub>3</sub>N<sub>2</sub>O<sub>3</sub>S [M+H]<sup>+</sup> 521.1141, found 521.1124; [α]<sub>D</sub><sup>21</sup> –220.4 (c 0.27, CHCl<sub>3</sub>, (S)-configuration).

### Synthesis of **1o**

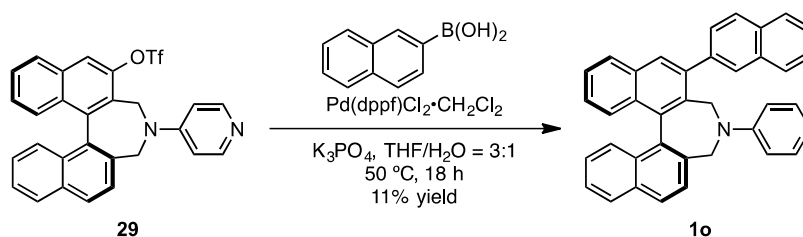

To a suspension of **29** (26.1 mg, 0.501 mmol), 2-naphthaleneboronic acid (8.60 mg, 50.0 μmol) and K<sub>3</sub>PO<sub>4</sub> (43.4 mg, 0.204 mmol) in THF (0.500 mL) and water (0.170 mL) was added Pd(dppf)Cl<sub>2</sub>·CH<sub>2</sub>Cl<sub>2</sub> (3.30 mg,

4.04  $\mu\text{mol}$ ) at room temperature. The reaction mixture was heated to 50 °C and stirred for 18 h. After cooled to room temperature, the reaction mixture was diluted with  $\text{CH}_2\text{Cl}_2$  (2 mL). The resulting solution was extracted with  $\text{CH}_2\text{Cl}_2$  (5 mL  $\times$  3), dried over  $\text{MgSO}_4$  and concentrated *in vacuo*. The purification of the crude product by flash column chromatography on silica gel (eluent: EtOAc to EtOAc + 3%  $\text{Et}_3\text{N}$ ) gave **1o** (2.70 mg, 5.41  $\mu\text{mol}$ , 11% yield) as a colorless solid.

$^1\text{H}$  NMR (600 MHz,  $\text{CDCl}_3$ )  $\delta$  8.05 (s, 1H), 7.99–7.97 (m, 6H), 7.89 (d,  $J$  = 7.8 Hz, 2H), 7.58–7.49 (m, 8H), 7.36–7.31 (m, 3H), 6.36 (bs, 2H), 4.87 (d,  $J$  = 12.9 Hz, 1H), 4.71 (d,  $J$  = 12.6 Hz, 1H), 4.06 (d,  $J$  = 12.6 Hz, 1H), 3.59 (d,  $J$  = 12.9 Hz, 1H);  $^{13}\text{C}$  NMR (150 MHz,  $\text{CDCl}_3$ )  $\delta$  153.0, 149.4, 139.9, 138.2, 136.0, 135.3, 133.5, 133.3, 132.9, 132.6, 132.5, 131.5, 130.8, 130.2, 129.5, 128.8, 128.5, 128.5, 128.2, 127.8, 127.7, 127.6, 127.4, 126.7, 126.6, 126.5, 126.4, 126.3, 126.1, 108.5, 50.7, 46.3; IR (KBr) 3651, 3049, 2963, 2365, 1506  $\text{cm}^{-1}$ ; HRMS ( $\text{FAB}^+$ ) calculated for  $\text{C}_{37}\text{H}_{27}\text{N}_2$  [ $\text{M}+\text{H}$ ] $^+$  499.2168, found 499.2168; mp 181 °C dec;  $[\alpha]_{\text{D}}^{22}$  –157.6 ( $c$  0.27,  $\text{CHCl}_3$ , (*S*)-configuration).

### An overview for synthesis of catalyst **1p**

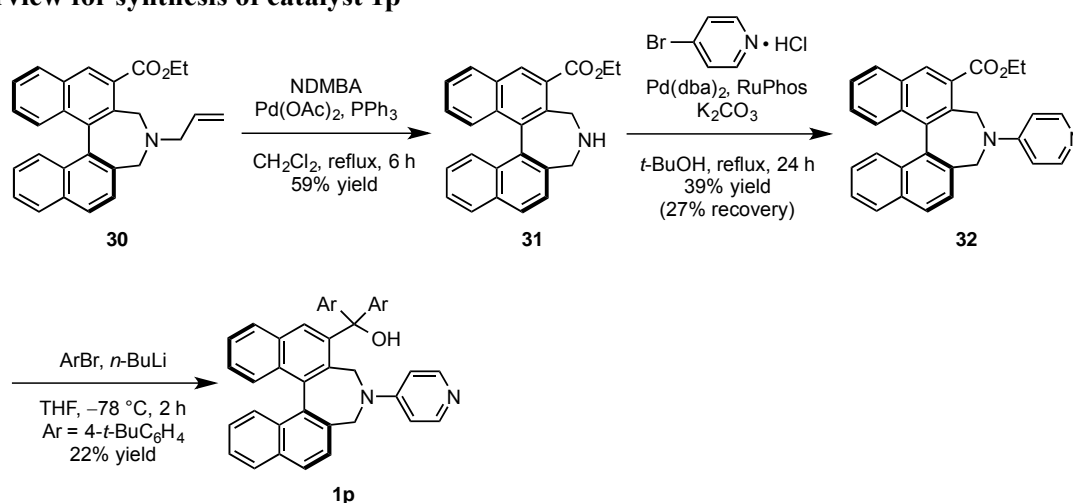

### Synthesis of **31**

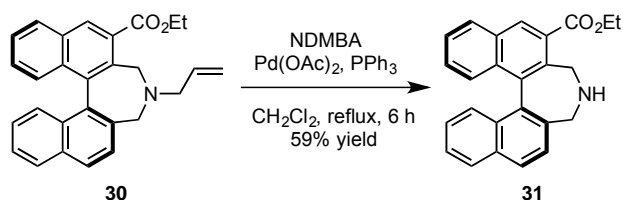

### (*S*)-Ethyl 4,5-dihydro-3H-dinaphtho[2,1-*c*:1',2'-*e*]azepine-2-carboxylate (**31**)

To a solution of **30**<sup>6</sup> (2.52 g, 6.17 mmol), NDMBA (1.94 g, 12.4 mmol) and  $\text{Ph}_3\text{P}$  (324 mg, 1.23 mmol) in  $\text{CH}_2\text{Cl}_2$  (20.6 mL) was added  $\text{Pd}(\text{OAc})_2$  (69.6 mg, 0.310 mmol) at room temperature. The reaction mixture was heated to refluxed temperature and stirred for 6 h, then water (20 mL) was added. The resulting solution was extracted with  $\text{CH}_2\text{Cl}_2$  (20 mL  $\times$  3). The organic layer was washed with saturated aqueous  $\text{NaHCO}_3$  (20 mL  $\times$  3), dried over  $\text{MgSO}_4$  and concentrated *in vacuo*. The purification of the crude product by flash column chromatography on silica gel (eluent:  $\text{Et}_2\text{O}$  to  $\text{Et}_2\text{O}/\text{MeOH}$  = 20/1 to 10/1, v/v) gave **31** (1.35 g, 3.68 mmol, 59% yield) as a pale yellow foam.

$^1\text{H}$  NMR (400 MHz,  $\text{CDCl}_3$ )  $\delta$  8.55 (s, 1H), 8.00 (t,  $J$  = 8.1 Hz, 2H), 7.95 (d,  $J$  = 8.1 Hz, 1H), 7.63 (d,  $J$  = 8.1 Hz, 1H), 7.52–7.42 (m, 2H), 7.41–7.29 (m, 3H), 7.29–7.22 (m, 1H), 4.63 (d,  $J$  = 13.3 Hz, 1H), 4.56–4.43 (m, 2H), 3.86 (d,  $J$  = 11.2 Hz, 1H), 3.50 (d,  $J$  = 11.2 Hz, 1H), 3.26 (d,  $J$  = 13.3 Hz, 1H), 2.53 (bs, 1H), 1.50 (t,  $J$  = 7.1 Hz, 3H);  $^{13}\text{C}$  NMR (100 MHz,  $\text{CDCl}_3$ )  $\delta$  168.1, 136.6, 135.0, 134.6, 133.9,



133.0, 132.6, 131.6 (2), 131.2, 129.2 (2), 128.3, 127.7, 127.4, 127.3, 127.1, 126.1, 125.8, 125.4, 61.3, 48.4, 44.3, 14.4; IR (KBr) 3053, 2953, 2384, 2349, 1717, 1294  $\text{cm}^{-1}$ ; HRMS (FAB<sup>+</sup>) calculated for  $\text{C}_{25}\text{H}_{22}\text{NO}_2$   $[\text{M}+\text{H}]^+$  368.1639, found 368.1637;  $[\alpha]_{\text{D}}^{23} +413.7$  (*c* 1.02,  $\text{CH}_2\text{Cl}_2$ , (*S*)-configuration).

### Synthesis of **32**

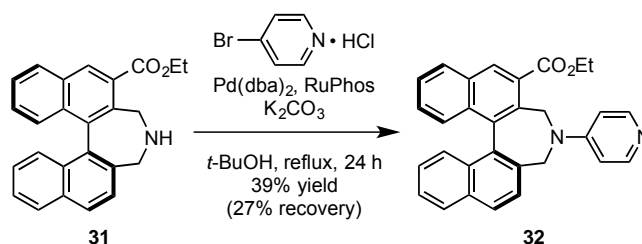

### (*S*)-Ethyl 4-(pyridin-4-yl)-4,5-dihydro-3H-dinaphtho[2,1-*c*:1',2'-*e*]azepine-2-carboxylate (**32**)

To a suspension of **31** (1.30 g, 3.54 mmol), 4-bromopyridine hydrochloride (1.37 g, 7.07 mmol), RuPhos (132 mg, 0.283 mmol) and potassium carbonate (2.94 g, 21.2 mmol) in *t*-BuOH (35.4 mL) was added Pd(dba)<sub>2</sub> (81.4 mg, 0.142 mmol) at room temperature. The reaction mixture was heated to refluxed temperature and vigorously stirred for 24 h, and then subsequently thoroughly washed with  $\text{CH}_2\text{Cl}_2$ . After filtrate was concentrated *in vacuo*, the purification of the crude product by flash column chromatography on silica gel (eluent:  $\text{Et}_2\text{O}$  to  $\text{Et}_2\text{O}/\text{MeOH} = 20/1$  to  $10/1$  to  $4/1$ , v/v) gave **32** (616 mg, 1.39 mmol, 39% yield) as a pale brown solid, along with recovered of **31** (357 mg, 0.972 mmol, 27% yield).

<sup>1</sup>H NMR (400 MHz,  $\text{CDCl}_3$ ) NMR (400 MHz,  $\text{CDCl}_3$ )  $\delta$  8.55 (s, 1H), 8.25 (d, *J* = 5.3 Hz, 2H), 7.99 (d, *J* = 8.0 Hz, 1H), 7.93 (d, *J* = 8.0 Hz, 2H), 7.54–7.23 (m, 7H), 6.71 (d, *J* = 5.3 Hz, 2H), 5.96 (d, *J* = 13.3 Hz, 1H), 4.52 (d, *J* = 12.4 Hz, 1H), 4.46–4.30 (m, 2H), 3.72 (d, *J* = 12.4 Hz, 1H), 3.62 (d, *J* = 13.3 Hz, 1H), 1.35 (t, *J* = 7.1 Hz, 3H); <sup>13</sup>C NMR (100 MHz,  $\text{CDCl}_3$ )  $\delta$  168.0, 153.3, 150.0, 137.0, 134.6, 133.3, 132.7, 132.6, 132.4, 131.8, 131.3, 131.2, 129.6, 129.3, 128.4, 128.3, 128.1, 127.5, 127.2 (2), 126.8, 126.4, 126.0, 108.7, 61.7, 50.5, 44.1, 14.3; IR (KBr) 2382, 1717, 1591, 1508, 1296, 1244  $\text{cm}^{-1}$ ; HRMS (FAB<sup>+</sup>) calculated for  $\text{C}_{30}\text{H}_{24}\text{N}_2\text{O}_2$   $[\text{M}+\text{H}]^+$  445.1905, found 445.1896; mp 86.6–88.0 °C;  $[\alpha]_{\text{D}}^{22} -243.4$  (*c* 0.585,  $\text{CH}_2\text{Cl}_2$ , (*S*)-configuration).

### Synthesis of **1p**

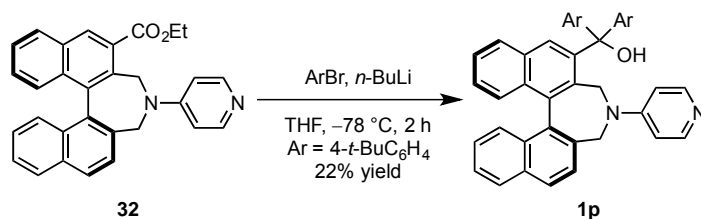

### (*S*)-2-(bis(4-(*tert*-butyl)phenyl)(methoxy)methyl)-4-(pyridin-4-yl)-4,5-dihydro-3H-dinaphtho[2,1-*c*:1',2'-*e*]azepine (**1p**)

To a solution of 1-bromo-4-*tert*-butylbenzene (104 benzene of toxy)methyl)-4-(pyridin-4-yl)-4,5-pwise a solution of *n*-BuLi in hexane (1.63 M, 375  $\mu\text{L}$ ) at  $-78$  °C and stirred for 20 min. After stirring for 20 min at  $-78$  °C, a solution of **32** (88.9 mg, 0.200 mmol) in THF (2.00 mL) was added to reaction mixture at  $-78$  °C. The reaction mixture was stirred for 2 h at  $-78$  °C. Then, water (5 mL) was added to the reaction mixture and extracted with  $\text{CHCl}_3$  (10 mL  $\times$  3), dried over  $\text{MgSO}_4$ , and concentrated *in vacuo*. The purification of the crude product by flash column chromatography on silica gel (eluent:  $\text{CHCl}_3/\text{MeOH} = 20/1$  to  $10/1$ , v/v) and

the resulting solid was subsequently thoroughly washed with EtOAc. After filtration and drying of the solid, **1p** (29.1 mg, 43.6  $\mu\text{mol}$ , 22% yield) was obtained as a pale yellow solid.

$^1\text{H}$  NMR (400 MHz,  $\text{CDCl}_3$ )  $\delta$  8.07 (d,  $J = 6.6$  Hz, 2H), 7.92 (d,  $J = 8.2$  Hz, 1H), 7.89 (d,  $J = 8.2$  Hz, 1H), 7.72 (d,  $J = 8.2$  Hz, 1H), 7.52–7.30 (m, 9H), 7.28–7.21 (m, 5H), 7.16 (d,  $J = 8.2$  Hz, 2H), 6.41 (d,  $J = 6.6$  Hz, 2H), 5.23 (d,  $J = 12.4$  Hz, 1H), 4.63 (d,  $J = 13.3$  Hz, 1H), 3.89 (d,  $J = 13.3$  Hz, 1H), 3.49 (bs, 1H), 3.15 (d,  $J = 12.4$  Hz, 1H), 1.32 (s, 9H), 1.26 (s, 9H);  $^{13}\text{C}$  NMR (100 MHz,  $\text{CDCl}_3$ )  $\delta$  153.1, 150.2, 150.0, 149.1, 144.7, 143.8, 143.1, 138.4, 134.8, 133.3, 132.9, 132.2, 132.0, 131.5, 130.9, 130.3, 129.4, 129.0, 128.4, 127.8, 127.5, 127.3, 126.6, 126.4, 126.2, 125.9, 125.1, 124.7, 108.5, 82.9, 50.3, 45.7, 34.6, 34.4, 31.5 (2); IR (KBr) 2961, 2384, 1607, 1506, 1236, 995  $\text{cm}^{-1}$ ; HRMS (FAB $^+$ ) calculated for  $\text{C}_{48}\text{H}_{47}\text{N}_2\text{O}$   $[\text{M}+\text{H}]^+$  667.3677, found 667.3709; mp 222  $^\circ\text{C}$  dec;  $[\alpha]_D^{25}$   $-340.5$  (c 0.305,  $\text{CHCl}_3$ , (S)-configuration).

### Synthesis of substrate 3c, 3q and 3r

#### Synthesis of 3c

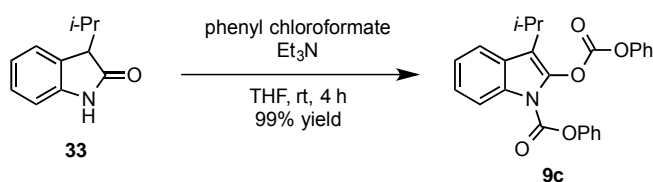

#### Phenyl 3-isopropyl-2-((phenoxycarbonyl)oxy)-1H-indole-1-carboxylate (**3c**)

To a solution of **33**<sup>8</sup> (262 mg, 1.50 mmol) and triethylamine (850  $\mu\text{L}$ , 6.10 mmol) in THF (5.00 mL) was added phenyl chloroformate (753  $\mu\text{L}$ , 6.00 mmol) at room temperature. The reaction mixture was stirred for 4 h at room temperature, and then 1 M aqueous HCl (10 mL) was carefully added. The resulting solution was extracted with EtOAc (10 mL  $\times$  3), dried over  $\text{MgSO}_4$  and concentrated *in vacuo*. The purification of the crude product by flash column chromatography on silica gel (eluent: hexane/ $\text{Et}_2\text{O} = 5/1$ , v/v) gave **9c** (619 mg, 1.49 mmol, 99% yield) as a colorless solid.

$^1\text{H}$  NMR (400 MHz,  $\text{CDCl}_3$ )  $\delta$  8.19 (d,  $J = 7.6$  Hz, 1H), 7.66 (d,  $J = 7.2$  Hz, 1H), 7.47 (t,  $J = 7.9$  Hz, 2H), 7.39–7.29 (m, 8H), 7.11 (d,  $J = 7.9$  Hz, 2H), 3.27 (quin,  $J = 7.0$  Hz, 1H), 1.46 (d,  $J = 7.0$  Hz, 6H);  $^{13}\text{C}$  NMR (100 MHz,  $\text{CDCl}_3$ )  $\delta$  151.4, 150.9, 149.9, 148.6, 136.0, 132.4, 129.7, 129.6, 126.7, 126.6, 126.5, 124.9, 123.6, 121.6, 120.7, 119.9, 115.7, 115.7, 24.5, 21.6; IR (KBr) 2963, 1790, 1749, 1456, 1364, 1120, 748  $\text{cm}^{-1}$ ; HRMS (FAB $^+$ ) calculated for  $\text{C}_{25}\text{H}_{22}\text{NO}_5$   $[\text{M}+\text{H}]^+$  416.1492, found 416.1505; mp 75.9–76.6  $^\circ\text{C}$ .

#### Synthesis of 9q

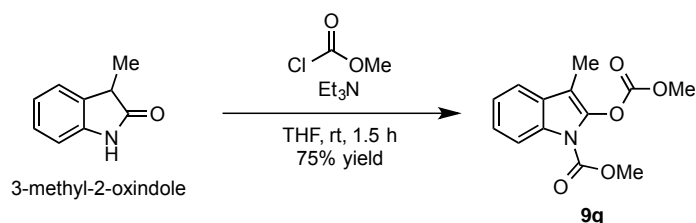

#### Methyl 2-((methoxycarbonyl)oxy)-3-methyl-1H-indole-1-carboxylate (**9q**)

To a solution of 3-methyl-2-oxindole (1.47 g, 9.99 mmol) and triethylamine (5.60 mL, 40.2 mmol) in THF (30.0 mL) was added methyl chloroformate (3.10 mL, 40.1 mmol) at room temperature. The reaction mixture was stirred for 1.5 h at room temperature, and then 1 M aqueous HCl (10 mL) was carefully added. The resulting solution was extracted with EtOAc (30 mL  $\times$  3), dried over  $\text{MgSO}_4$  and concentrated *in vacuo*. The

purification of the crude product by flash column chromatography on silica gel (eluent: hexane/Et<sub>2</sub>O = 3/1 to 1/1, v/v) gave **9q** (1.97 g, 7.48 mmol, 75% yield) as a orange solid.

<sup>1</sup>H NMR (600 MHz, CDCl<sub>3</sub>) δ 8.02 (d, *J* = 7.7 Hz, 1H), 7.47 (d, *J* = 7.7 Hz, 1H), 7.33 (td, *J* = 7.7, 1.6 Hz, 1H), 7.28 (td, *J* = 7.7, 1.0 Hz, 1H), 4.01 (s, 3H), 3.98 (s, 3H), 2.16 (s, 3H); <sup>13</sup>C NMR (150 MHz, CDCl<sub>3</sub>) δ 153.3, 150.9, 137.6, 132.0, 128.1, 124.8, 123.4, 119.0, 115.4, 105.4, 56.3, 53.9, 7.0; IR (KBr) 2961, 1775, 1732, 1653, 1460, 1356, 1273, 1040, 934, 754 cm<sup>-1</sup>; HRMS (FAB<sup>+</sup>) calculated for C<sub>13</sub>H<sub>14</sub>NO<sub>5</sub> [M+H]<sup>+</sup> 264.0866, found 264.0877; mp 51.3–51.9 °C.

### Synthesis of **9r**

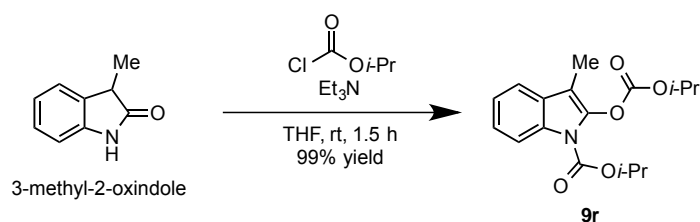

### Isopropyl 2-((isopropoxycarbonyl)oxy)-3-methyl-1*H*-indole-1-carboxylate (**9r**)

To a solution of 3-methyl-2-oxindole (1.47 g, 9.99 mmol) and triethylamine (5.60 mL, 40.2 mmol) in THF (30.0 mL) was added isopropyl chloroformate (5.50 mL, 40.0 mmol) at room temperature. The reaction mixture was stirred for 1.5 h at room temperature, and then 1 M aqueous HCl (10 mL) was carefully added. The resulting solution was extracted with EtOAc (30 mL × 3), dried over MgSO<sub>4</sub> and concentrated *in vacuo*. The purification of the crude product by flash column chromatography on silica gel (eluent: hexane/Et<sub>2</sub>O = 6/1, v/v) gave **9r** (3.16 g, 9.90 mmol, 99% yield) as a pale yellow oil.

<sup>1</sup>H NMR (600 MHz, CDCl<sub>3</sub>) δ 8.07 (d, *J* = 7.8 Hz, 1H), 7.46 (d, *J* = 7.8 Hz, 1H), 7.31 (td, *J* = 7.8, 1.6 Hz, 1H), 7.28–7.22 (m, 1H), 5.26 (sep, *J* = 6.1 Hz, 1H), 5.02 (sep, *J* = 6.1 Hz, 1H), 2.15 (s, 3H), 1.43 (d, *J* = 6.2 Hz, 6H), 1.42 (d, *J* = 6.2 Hz, 6H); <sup>13</sup>C NMR (150 MHz, CDCl<sub>3</sub>) δ 152.1, 150.0, 137.9, 132.2, 128.1, 124.5, 123.1, 118.8, 115.5, 74.3, 71.5, 22.0, 21.8, 7.0; IR (KBr) 2984, 1755, 1708, 1651, 1456, 1099, 912, 752 cm<sup>-1</sup>; HRMS (FAB<sup>+</sup>) calculated for C<sub>12</sub>H<sub>22</sub>NO<sub>5</sub> [M+H]<sup>+</sup> 320.1492, found 320.1487.

### General procedure for the Steglich rearrangement of oxindole derivatives

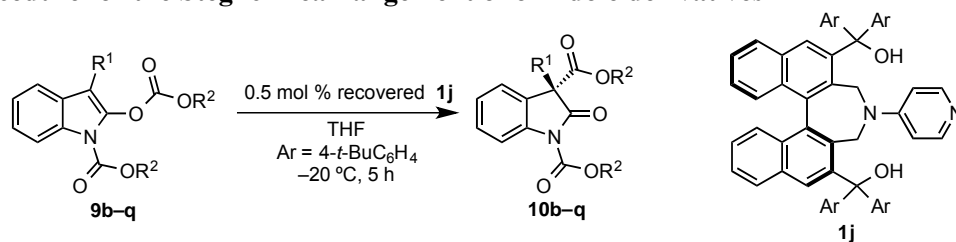

When the catalytic amounts was less than 0.5 mol %, a solution of the catalyst in THF (50.0 mM) was prepared in advance and this stock solution was used the following reaction.

To a solution of substrate **9b–r** in THF was added a catalyst or a solution of the catalyst at –20 °C. The reaction mixture was stirred for 5 h and then 1 M aqueous HCl was added. The resulting mixture was extracted with EtOAc, dried over MgSO<sub>4</sub> and concentrated *in vacuo*. The purification of the crude product by flash column chromatography on a short pad of silica gel (eluent: hexane/Et<sub>2</sub>O = 1/1, v/v) gave the corresponding product **10b–m** (>98% yield). The enantiomeric ratio was determined by chiral HPLC analysis.

The absolute configuration of the product **10j** was assigned to be (*S*)-configuration according to Vedejs's

paper<sup>9</sup> and **10b**, **10d–l** and **10n–p** were assigned to be (*S*)-configuration according to our previous paper (**10k**; (*R*)-configuration)<sup>10</sup>. For product **10c**, the absolute configuration was determined by single crystal X-ray structure analysis (Supplementary Figure 67).

### Steglich rearrangement on multi-gram scale (Figure 4b)

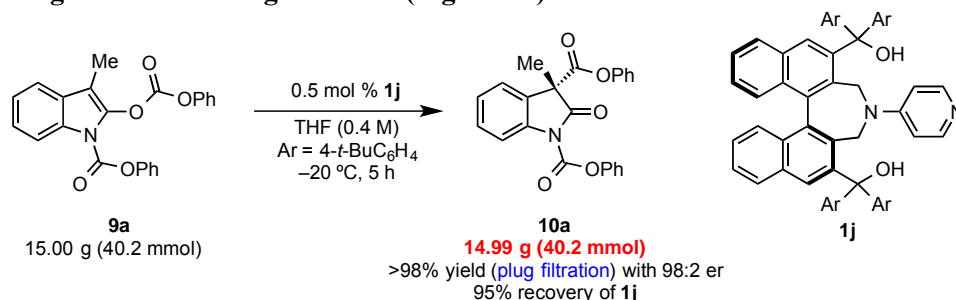

We carried out large scale reaction (15 g, 40.2 mmol). The reaction proceeded smoothly and **10a**<sup>9</sup> was obtained in >98% yield (14.99 g, 40.2 mmol) along with 95% recovery of catalyst **1j** after simple plug filtration (eluent: hexane/Et<sub>2</sub>O = 1/1 for obtaining **10a**; then Et<sub>2</sub>O/MeOH = 5/1 for catalyst recovery). <sup>1</sup>H NMR spectra of **10a** clearly indicated that simple plug filtration was enough for obtaining analytically pure **10a**. The procedure was as follows.

To a solution of **9a**<sup>9</sup> (15.0 g, 42.0 mmol) in THF (95.5 mL) was added solution of **1j** (193.2 mg, 0.2 mmol) in THF (5.00 mL) at -20 °C. The reaction mixture was stirred for 5 h at -20 °C, then monitored by TLC. After checking of disappearance of **9a**, the reaction solution was transferred to other flask using Et<sub>2</sub>O to wash the reaction vessel and concentrated in *vacuo*. The purification of the crude product by flash column chromatography on a short pad of silica gel (eluent: hexane/Et<sub>2</sub>O = 1/1, v/v) gave the **10a** (15.0 g, 42.0 mmol, >98% yield) and the catalyst **1j** was recovered by elution of polar solvent (Et<sub>2</sub>O/MeOH = 5/1, v/v): enantiomeric ratio was determined by HPLC with DAICEL CHIRALPAK<sup>®</sup> AS-3 (hexane/*i*-PrOH = 85/25, v/v, flow rate = 0.30 mL/min, 30 °C, UV = 254 nm), T<sub>R</sub> = 13.0 min (major) and T<sub>R</sub> = 14.0 min (minor), 98:2 er (Supplementary Figure 40); <sup>1</sup>H NMR (400 MHz, CDCl<sub>3</sub>) δ 8.10 (d, *J* = 7.6 Hz, 1H), 7.51–7.27 (m, 10H), 7.22 (d, *J* = 7.6 Hz, 1H), 6.97 (d, *J* = 8.0 Hz, 2H), 1.90 (s, 3H); <sup>13</sup>C NMR (100 MHz, CDCl<sub>3</sub>) δ 172.4, 167.6, 150.2, 150.1, 149.3, 139.1, 129.9, 129.6, 129.5, 128.6, 126.6, 126.4, 125.7, 123.0, 121.5, 121.1, 115.9, 55.9, 20.9; IR (KBr) 3069, 1802, 1741, 1724, 1591, 1477, 1341, 1209, 1092, 959, 758 cm<sup>-1</sup>; [α]<sub>D</sub><sup>21</sup> +74.1 (*c* 1.03, CH<sub>2</sub>Cl<sub>2</sub>, 98:2 er, (*S*)-configuration) [lit.<sup>10</sup> [α]<sub>D</sub><sup>20</sup> +34.0 (*c* 0.16, CHCl<sub>3</sub>, 92:8 er, (*S*)-configuration)].

### The Steglich rearrangement with the recovered catalyst 1j

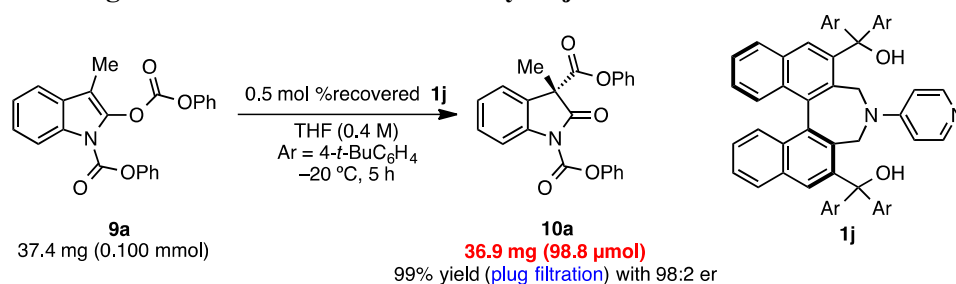

Furthermore, the same reaction (37.4 mg of **9a**, 0.1 mmol scale) was carried out with recovered catalyst **1j** from large scale reaction, and the reaction proceeded smoothly to give desired product in 99% yield with

98:2 er.  $^1\text{H}$  NMR spectra of **10a** after simple plug filtration showed analytically pure **10a**. It was indicated that our catalyst can be used at least twice without loss of any catalytic activity and enantioselectivity.

To a solution of recovered **9a** (37.4 mg, 0.100 mmol) in THF (0.250 ml) was added solution of **1j** (50 mM, 10  $\mu\text{L}$ , 2.50  $\mu\text{mol}$ ) in THF at  $-20\text{ }^\circ\text{C}$ . The reaction mixture was stirred for 5 h at  $-20\text{ }^\circ\text{C}$  and then 1 M aqueous HCl was added. The resulting mixture was extracted with EtOAc, dried over  $\text{MgSO}_4$  and concentrated *in vacuo*. The purification of the crude product by flash column chromatography on a short pad of silica gel (eluent: hexane/Et<sub>2</sub>O = 1/1, v/v) gave the **10a** (36.9 mg, 98.9  $\mu\text{mol}$ , 99% yield): enantiomeric ratio was determined by HPLC with DAICEL CHIRALPAK<sup>®</sup> AS-3 (hexane/*i*-PrOH = 85/25, v/v, flow rate = 0.30 mL/min, 30  $^\circ\text{C}$ , UV = 254 nm),  $T_{\text{R}}$  = 13.0 min (major) and  $T_{\text{R}}$  = 14.0 min (minor), 98:2 er (Supplementary Figure 41). Other analytical data was shown as above.

### Analytical data for products **9b–q** of Steglich rearrangement

#### (*S*)-Diphenyl 3-ethyl-2-oxindoline-1,3-dicarboxylate (**10b**)<sup>10</sup>

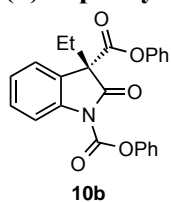

According to general procedure, substrate **9b**<sup>10</sup> (80.9 mg, 0.202 mmol) with a solution of catalyst **1j** (20.0  $\mu\text{L}$ , 50.0 mM in THF, 1.00  $\mu\text{mol}$ ) in THF (0.500 mL) at  $-20\text{ }^\circ\text{C}$  gave a yellow solid (80.2 mg, 0.200 mmol, >98% yield): enantiomeric ratio was determined by HPLC with DAICEL CHIRALPAK AD-H<sup>®</sup> (hexane/*i*-PrOH = 97.5/2.5, v/v, flow rate = 1.00 mL/min, 30  $^\circ\text{C}$ , UV = 254 nm),  $T_{\text{R}}$  = 21.8 min (minor) and  $T_{\text{R}}$  = 26.6 min (major), 98:2 er (Supplementary Figure 55);  $^1\text{H}$  NMR (400 MHz,  $\text{CDCl}_3$ )  $\delta$  8.05 (d,  $J$  = 8.4 Hz, 1H), 7.50–7.39 (m, 4H), 7.38–7.27 (m, 6H), 7.22 (t,  $J$  = 7.2 Hz, 1H), 6.98 (d,  $J$  = 8.8 Hz, 2H), 2.56 (dq,  $J$  = 13.9, 7.4 Hz, 2H), 2.42 (dq,  $J$  = 13.9, 7.4 Hz, 2H), 0.86 (t,  $J$  = 7.4 Hz, 3H);  $^{13}\text{C}$  NMR (100 MHz,  $\text{CDCl}_3$ )  $\delta$  171.8, 167.5, 150.3, 150.2, 149.4, 140.0, 130.0, 129.8, 129.6, 126.7, 126.6, 126.5, 125.8, 123.3, 121.6, 121.3, 115.9, 60.9, 28.4, 8.3; IR (KBr) 3078, 2970, 1811, 1784, 1749, 1722, 1591, 1476, 1206  $\text{cm}^{-1}$ ; HRMS (FAB<sup>+</sup>) calculated for  $\text{C}_{24}\text{H}_{20}\text{NO}_5$   $[\text{M}+\text{H}]^+$  402.1335, found 402.1363; mp 133.1–133.7  $^\circ\text{C}$ ;  $[\alpha]_{\text{D}}^{20}$  +60.3 ( $c$  0.51,  $\text{CH}_2\text{Cl}_2$ , 98:2 er, (*S*-configuration) [lit.<sup>10</sup>  $[\alpha]_{\text{D}}^{24}$  +19.8 ( $c$  0.49,  $\text{CHCl}_3$ , 91:9 er, (*S*-configuration)].

#### (*S*)-Diphenyl 3-isopropyl-2-oxindoline-1,3-dicarboxylate (**10c**)

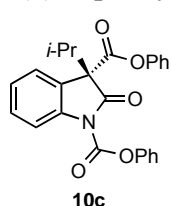

According to general procedure, substrate **9c** (41.1 mg, 0.0989 mmol) with catalyst **1j** (3.00 mg, 3.12  $\mu\text{mol}$ ) in THF (0.250 mL) at 25  $^\circ\text{C}$  gave a colorless solid (40.9 mg, 0.0984 mmol, >98% yield): enantiomeric ratio was determined by HPLC with DAICEL CHIRALPAK AD-H<sup>®</sup> (hexane/*i*-PrOH = 99.3/0.7, v/v, flow rate = 1.50 mL/min, 30  $^\circ\text{C}$ , UV = 254 nm),  $T_{\text{R}}$  = 13.7 min (minor) and  $T_{\text{R}}$  = 22.3 min (major), 96:4 er (Supplementary Figure 56);  $^1\text{H}$  NMR (400 MHz,  $\text{CDCl}_3$ )  $\delta$  8.03 (d,  $J$  = 8.0 Hz, 1H), 7.51 (d,  $J$  = 7.6 Hz, 1H), 7.50–7.19 (m, 10H), 7.02 (d,  $J$  = 7.2 Hz, 2H), 2.96 (sep,  $J$  = 7.1 Hz, 1H), 1.31 (d,  $J$  = 7.1 Hz, 3H), 0.94 (d,  $J$  = 7.1 Hz, 3H);  $^{13}\text{C}$  NMR (100 MHz,  $\text{CDCl}_3$ )  $\delta$  170.5, 167.2, 150.4, 150.2, 149.4, 139.7, 129.8, 129.7, 129.6, 126.7, 126.6, 126.5, 125.6, 123.9, 121.7, 121.4, 115.5, 63.8, 36.3, 17.5, 17.2; IR (KBr) 2968, 1811, 1748, 1489, 1207, 761  $\text{cm}^{-1}$ ; HRMS (ESI<sup>+</sup>) calculated for  $\text{C}_{25}\text{H}_{22}\text{NO}_5$   $[\text{M}+\text{H}]^+$  416.1486, found 416.1489; mp 153.1–154.1  $^\circ\text{C}$ ;  $[\alpha]_{\text{D}}^{24}$  +30.0 ( $c$  0.62,  $\text{CH}_2\text{Cl}_2$ , 96:4 er, (*S*-configuration).

#### (*S*)-Diphenyl 3-benzyl-2-oxindoline-1,3-dicarboxylate (**10d**)<sup>10</sup>

According to general procedure, substrate **9d**<sup>10</sup> (92.6 mg, 0.200 mmol) with a solution of catalyst **1j** (20.0  $\mu\text{L}$ , 50.0 mM in THF, 1.00  $\mu\text{mol}$ ) in THF (0.500 mL) at  $-20\text{ }^\circ\text{C}$  gave a pale yellow solid (91.6 mg, 0.198 mmol, >98% yield): enantiomeric ratio was determined by HPLC with DAICEL CHIRALPAK AD-H<sup>®</sup>

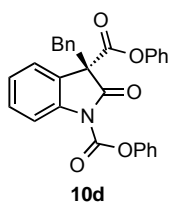

(hexane/*i*-PrOH = 90/10, v/v, flow rate = 1.00 mL/min, 30 °C, UV = 254 nm),  $T_R$  = 13.1 min (major) and  $T_R$  = 15.2 min (minor), 96:4 er (Supplementary Figure 57);  $^1\text{H}$  NMR (400 MHz,  $\text{CDCl}_3$ )  $\delta$  7.78 (d,  $J$  = 7.8 Hz, 1H), 7.52 (dd,  $J$  = 7.8, 1.2 Hz, 1H), 7.48–7.05 (m, 13H), 7.04–6.99 (m, 2H), 6.93 (d,  $J$  = 6.8 Hz, 2H), 3.78 (d,  $J$  = 13.6 Hz, 1H), 3.68 (d,  $J$  = 13.6 Hz, 1H);  $^{13}\text{C}$  NMR (100 MHz,  $\text{CDCl}_3$ )  $\delta$  171.3, 167.4, 150.4, 150.1, 148.9, 139.9, 133.4, 130.2, 130.1, 129.7, 129.6, 128.2, 127.5, 126.7, 126.6, 126.3, 125.5, 123.7, 121.6, 121.3, 115.8, 61.8, 41.1; IR (KBr) 3062, 1809, 1778, 1747, 1497, 1350, 1184, 744  $\text{cm}^{-1}$ ; HRMS (FAB $^+$ ) calculated for  $\text{C}_{29}\text{H}_{22}\text{NO}_5$   $[\text{M}+\text{H}]^+$  464.1492, found 464.1473; mp 147.9–148.3 °C;  $[\alpha]_D^{24}$  +37.9 (*c* 0.45,  $\text{CH}_2\text{Cl}_2$ , 96:4 er, (*S*)-configuration) [lit. $^{10}$   $[\alpha]_D^{24}$  +13.9 (*c* 0.50,  $\text{CHCl}_3$ , 99:1 er, (*S*)-configuration)].

### (*S*)-Diphenyl 3-allyl-2-oxindoline-1,3-dicarboxylate (**10e**) $^{10}$

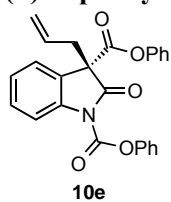

According to general procedure, substrate **9e** $^{10}$  (82.7 mg, 0.200 mmol) with a solution of catalyst **1j** (20.0  $\mu\text{L}$ , 50.0 mM in THF, 1.00  $\mu\text{mol}$ ) in THF (0.500 mL) at  $-20$  °C gave a pale yellow solid (82.5 mg, 0.200 mmol, >98% yield): enantiomeric ratio was determined by HPLC with DAICEL CHIRALPAK AD-H $^{\text{R}}$  (hexane/*i*-PrOH = 98/2, v/v, flow rate = 1.00 mL/min, 30 °C, UV = 254 nm),  $T_R$  = 24.9 min (minor) and  $T_R$  = 30.7 min (major), 99:1 er (Supplementary Figure 58);  $^1\text{H}$  NMR (400 MHz,  $\text{CDCl}_3$ )  $\delta$  8.03 (d,  $J$  = 8.0 Hz, 1H), 7.55–7.39 (m, 5H), 7.55–7.26 (m, 6H), 6.99 (d,  $J$  = 8.0 Hz, 2H), 5.60–5.45 (m, 1H), 5.18 (dd,  $J$  = 17.0, 1.4 Hz, 1H), 5.09 (d,  $J$  = 10.4, 1H), 3.17 (d,  $J$  = 7.2 Hz);  $^{13}\text{C}$  NMR (100 MHz,  $\text{CDCl}_3$ )  $\delta$  171.2, 167.1, 150.3, 150.2, 149.3, 139.8, 130.1, 129.7, 129.6, 126.7, 126.5, 126.4, 126.3, 125.7, 123.6, 121.6, 121.3, 121.1, 115.9, 60.2, 39.2; IR (KBr) 3066, 1788, 1751, 1477, 1224, 1159, 750  $\text{cm}^{-1}$ ; HRMS (FAB $^+$ ) calculated for  $\text{C}_{25}\text{H}_{20}\text{NO}_5$   $[\text{M}+\text{H}]^+$  414.1335, found 414.1329; mp 164.1–165.0 °C;  $[\alpha]_D^{24}$  +67.4 (*c* 0.76,  $\text{CH}_2\text{Cl}_2$ , 99:1 er, (*S*)-configuration) [lit. $^{10}$   $[\alpha]_D^{24}$  +29.1 (*c* 0.49,  $\text{CHCl}_3$ , 89:11 er, (*S*)-configuration)].

### (*S*)-Diphenyl 3-(but-2-yn-1-yl)-2-oxindoline-1,3-dicarboxylate (**10f**) $^{10}$

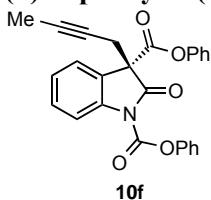

According to general procedure, substrate **9f** $^{10}$  (42.0 mg, 0.0987 mmol), THF (0.250 mL) with a solution of catalyst **1j** (10.0  $\mu\text{L}$ , 50.0 mM in THF, 0.500  $\mu\text{mol}$ ) at  $-20$  °C gave a colorless solid (41.7 mg, 0.0980 mmol, >98% yield): enantiomeric ratio was determined by HPLC with DAICEL CHIRALPAK AD-H $^{\text{R}}$  (hexane/*i*-PrOH = 85/15, v/v, flow rate = 1.00 mL/min, 30 °C, UV = 254 nm),  $T_R$  = 12.4 min (major) and  $T_R$  = 37.1

min (minor), 97:3 er (Supplementary Figure 59);  $^1\text{H}$  NMR (400 MHz,  $\text{CDCl}_3$ )  $\delta$  8.06 (d,  $J$  = 8.0 Hz, 1H), 7.52–7.42 (m, 4H), 7.38–7.28 (m, 6H), 7.23 (t,  $J$  = 7.6 Hz, 1H), 6.99 (d,  $J$  = 8.0 Hz, 2H), 3.25 (dd,  $J$  = 2.3, 2.0 Hz, 2H), 1.64 (t,  $J$  = 2.3 Hz, 3H);  $^{13}\text{C}$  NMR (100 MHz,  $\text{CDCl}_3$ )  $\delta$  170.9, 166.5, 150.2, 150.2, 149.3, 140.1, 130.2, 129.7, 129.6, 126.7, 126.4, 125.7, 123.4, 121.6, 121.2, 115.8, 79.5, 71.8, 59.5, 25.8, 3.5; IR (KBr) 2627, 2359, 2340, 1778, 1748, 1732, 1348, 1217, 1157, 689  $\text{cm}^{-1}$ ; HRMS (EI $^+$ ) calculated for  $\text{C}_{26}\text{H}_{19}\text{NO}_5$   $[\text{M}]^+$  425.1257, found 425.1257; mp 99.3–100.2 °C;  $[\alpha]_D^{24}$  +9.9 (*c* 0.85,  $\text{CH}_2\text{Cl}_2$ , 97:3 er, (*S*)-configuration) [lit. $^{10}$   $[\alpha]_D^{22}$  +17.0 (*c* 0.48,  $\text{CHCl}_3$ , 91:9 er, (*S*)-configuration)].

### (*R*)-Diphenyl 3-(2-((methoxycarbonyl)amino)ethyl)-2-oxindoline-1,3-dicarboxylate (**10g**) $^{10}$

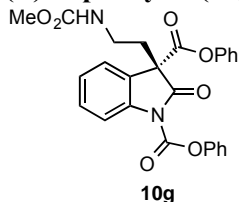

According to general procedure, substrate **9g** $^{10}$  (47.4 mg, 0.100 mmol), THF (0.250 mL) with a solution of catalyst **1j** (10.0  $\mu\text{L}$ , 50.0 mM in THF, 0.500  $\mu\text{mol}$ ) at  $-20$  °C gave a pale yellow solid (47.2 mg, 0.0991 mmol, >98% yield): enantiomeric ratio was determined by HPLC with DAICEL CHIRALPAK AD-H $^{\text{R}}$  (hexane/*i*-PrOH = 80/20, v/v, flow rate = 1.00 mL/min, 30 °C, UV = 254 nm),  $T_R$  = 17.0 min (major) and  $T_R$  =

21.6 min (minor), 97:3 er (Supplementary Figure 60);  $^1\text{H}$  NMR (400 MHz,  $\text{CDCl}_3$ )  $\delta$  8.06 (d,  $J = 8.0$  Hz, 1H), 7.55–7.40 (m, 4H), 7.39–7.27 (m, 6H), 7.22 (t,  $J = 7.2$  Hz, 1H), 6.97 (d,  $J = 8.0$  Hz, 2H), 4.81 (bs, 1H), 3.57 (s, 3H), 3.37–3.15 (m, 2H), 2.28–2.75 (m, 1H), 2.67–2.52 (m, 1H);  $^{13}\text{C}$  NMR (100 MHz,  $\text{CDCl}_3$ )  $\delta$  171.8, 167.1, 156.7, 150.2, 150.1, 149.2, 139.7, 130.3, 129.7, 129.6, 126.7, 126.6, 126.0, 123.4, 121.6, 121.2, 116.2, 58.7, 52.3, 36.7, 34.6; IR (KBr) 3404, 2951, 1748, 1593, 1479, 1350, 1221, 910, 750  $\text{cm}^{-1}$ ; HRMS ( $\text{EI}^+$ ) calculated for  $\text{C}_{26}\text{H}_{22}\text{N}_2\text{O}_7$  [ $\text{M}$ ] $^+$  474.1421, found 474.1409; mp 54.3–55.0  $^\circ\text{C}$ ;  $[\alpha]_{\text{D}}^{23} +68.7$  ( $c$  0.51,  $\text{CH}_2\text{Cl}_2$ , 97:3 er, (*S*)-configuration) [lit. $^{10}$   $[\alpha]_{\text{D}}^{23} +47.8$  ( $c$  0.52,  $\text{CHCl}_3$ , 92:8 er, (*S*)-configuration)].

**(*S*)-diphenyl 3-(2-((*tert*-butyldimethylsilyloxy)ethyl)-2-oxoindoline-1,3-dicarboxylate (10h) $^{10}$**

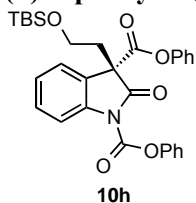

According to general procedure, substrate **10h** $^{10}$  (53.0 mg, 0.0997 mmol) with a solution of catalyst **1j** (10.0  $\mu\text{L}$ , 50.0 mM in THF, 0.500  $\mu\text{mol}$ ) in THF (0.250 mL) at  $-20$   $^\circ\text{C}$  gave a colorless oil (52.7 mg, 0.0991 mmol, >98% yield): enantiomeric ratio was determined by HPLC with DAICEL CHIRALPAK AD-H $^{\text{R}}$  (hexane/*i*-PrOH = 90/10, v/v, flow rate = 1.00 mL/min, 30  $^\circ\text{C}$ , UV = 254 nm),  $T_{\text{R}} = 7.3$  min (major) and  $T_{\text{R}} = 20.4$  min (minor), 92:8 er (Supplementary Figure 61);  $^1\text{H}$  NMR (400 MHz,  $\text{CDCl}_3$ )  $\delta$  8.08 (d,  $J = 8.4$  Hz, 1H), 7.48–7.46 (m, 3H), 7.38–7.27 (m, 7H), 7.21 (t,  $J = 7.6$  Hz, 1H), 6.95 (d,  $J = 7.6$  Hz, 2H), 3.71 (ddd,  $J = 10.2, 4.8, 3.1$  Hz, 1H), 3.41 (td,  $J = 10.2, 4.8$  Hz, 1H), 2.89 (ddd,  $J = 14.9, 10.2, 4.8$  Hz, 1H), 2.67 (dt,  $J = 14.9, 3.1$  Hz, 1H), 0.76 (s, 9H),  $-0.12$  (s, 3H),  $-0.15$  (s, 3H);  $^{13}\text{C}$  NMR (100 MHz,  $\text{CDCl}_3$ )  $\delta$  171.7, 167.8, 150.4, 150.3, 149.6, 140.5, 129.9, 129.6, 129.5, 126.5, 126.5, 125.9, 125.2, 123.5, 121.7, 121.3, 116.1, 58.9, 58.8, 36.2, 25.9, 18.4,  $-5.8$ ,  $-5.8$ ; IR (KBr) 2930, 1811, 1790, 1748, 1479, 1350, 1186, 752  $\text{cm}^{-1}$ ; HRMS ( $\text{ESI}^+$ ) calculated for  $\text{C}_{30}\text{H}_{34}\text{NO}_6\text{Si}$  [ $\text{M}+\text{H}$ ] $^+$  532.2146, found 532.2128;  $[\alpha]_{\text{D}}^{22} +29.4$  ( $c$  1.12,  $\text{CH}_2\text{Cl}_2$ , 92:8 er, (*S*)-configuration) [lit. $^{10}$   $[\alpha]_{\text{D}}^{22} +38.2$  ( $c$  0.48,  $\text{CHCl}_3$ , 92:8 er, (*S*)-configuration)].

**(*S*)-Diphenyl 3-(cyanomethyl)-2-oxoindoline-1,3-dicarboxylate (10i) $^{10}$**

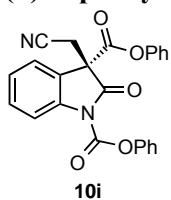

According to general procedure, substrate **9i** $^{10}$  (41.0 mg, 0.0994 mmol) with a solution of catalyst **1j** (10.0  $\mu\text{L}$ , 50.0 mM in THF, 0.500  $\mu\text{mol}$ ) in THF (0.250 mL) at  $-20$   $^\circ\text{C}$  gave a pale yellow solid (40.8 mg, 0.0989 mmol, >98% yield): enantiomeric ratio was determined by HPLC with DAICEL CHIRALPAK AD-H $^{\text{R}}$  (hexane/*i*-PrOH = 82/18, v/v, flow rate = 1.00 mL/min, 30  $^\circ\text{C}$ , UV = 254 nm),  $T_{\text{R}} = 17.6$  min (major) and  $T_{\text{R}} = 19.2$  min (minor), 91:9 er (Supplementary Figure 62);  $^1\text{H}$  NMR (400 MHz,  $\text{CDCl}_3$ )  $\delta$  8.12 (d,  $J = 8.4$  Hz, 1H), 7.59–7.22 (m, 11H), 6.97 (d,  $J = 8.4$  Hz, 2H), 3.51 (d,  $J = 16.8$  Hz, 1H), 3.31 (d,  $J = 16.8$  Hz, 1H);  $^{13}\text{C}$  NMR (100 MHz,  $\text{CDCl}_3$ )  $\delta$  169.4, 165.3, 150.0, 150.0, 148.9, 140.0, 131.5, 129.9, 129.8, 127.1, 127.0, 126.4, 124.1, 123.4, 121.5, 121.0, 116.7, 115.0, 56.8, 23.4; IR (KBr) 3059, 2978, 1809, 1782, 1755, 1602, 1481, 1348, 1217, 746, 689  $\text{cm}^{-1}$ ; HRMS ( $\text{EI}^+$ ) calculated for  $\text{C}_{24}\text{H}_{16}\text{N}_2\text{O}_5$  [ $\text{M}$ ] $^+$  412.1053, found 412.1079; mp 130.0–130.9  $^\circ\text{C}$ ;  $[\alpha]_{\text{D}}^{21} +35.2$  ( $c$  0.50,  $\text{CH}_2\text{Cl}_2$ , 91:9 er, (*S*)-configuration) [lit. $^{10}$   $[\alpha]_{\text{D}}^{24} +19.3$  ( $c$  0.52,  $\text{CHCl}_3$ , 99:1 er, (*S*)-configuration)].

**(*S*)-Diphenyl 3-phenyl-2-oxoindoline-1,3-dicarboxylate (10j) $^{9, 10, 16}$**

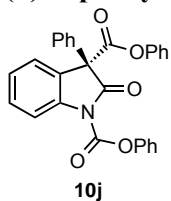

According to general procedure, substrate **9j** $^{9, 16}$  (45.2 mg, 0.101 mmol) with a catalyst **1j** (2.90 mg, 3.00  $\mu\text{mol}$ ) in THF (0.250 mL) at  $-20$   $^\circ\text{C}$  gave a colorless solid (45.0 mg, 0.100 mmol, >98% yield): enantiomeric ratio was determined by HPLC with DAICEL CHIRALPAK AD-H $^{\text{R}}$  (hexane/*i*-PrOH = 90/10, v/v, flow rate = 1.00 mL/min, 30  $^\circ\text{C}$ , UV = 254 nm),  $T_{\text{R}} = 15.7$  min (minor) and  $T_{\text{R}} = 22.9$  min (major), 84:16 er (Supplementary Figure 63);  $^1\text{H}$  NMR (400 MHz,  $\text{CDCl}_3$ )  $\delta$  8.15 (d,  $J = 8.4$  Hz, 1H), 7.65 (dd,  $J = 7.4, 1.0$  Hz, 1H), 7.56 (td,  $J = 7.8, 1.5$  Hz, 1H), 7.48–7.20 (m, 14H), 7.04 (d,  $J = 7.6$  Hz, 2H);  $^{13}\text{C}$  NMR (100 MHz,  $\text{CDCl}_3$ )  $\delta$  170.0, 167.2,

150.5, 150.2, 149.5, 140.2, 135.0, 130.6, 129.7, 129.6, 129.1, 129.0, 128.4, 126.7, 126.6, 126.0, 125.8, 125.6, 121.6, 121.2, 116.3, 64.8; IR (KBr) 3043, 2925, 1813, 1749, 1725, 1596, 1492, 1229, 841  $\text{cm}^{-1}$ ;  $[\alpha]_{\text{D}}^{22} +165.6$  (*c* 0.27,  $\text{CH}_2\text{Cl}_2$ , 84:16 er, (*S*)-configuration) [lit.<sup>10</sup>  $[\alpha]_{\text{D}}^{22} +139.5$  (*c* 0.49,  $\text{CHCl}_3$ , 92:8 er, (*S*)-configuration)].

### (*R*)-diphenyl 2-oxo-3-(thiophen-2-yl)indoline-1,3-dicarboxylate (**10k**)<sup>10</sup>

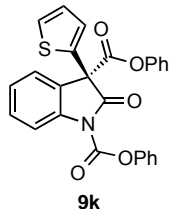

According to general procedure, substrate **9k**<sup>10</sup> (45.3 mg, 0.0995 mmol) with a catalyst **1j** (3.00 mg, 3.12  $\mu\text{mol}$ ) in THF (0.250 mL) at  $-20\text{ }^\circ\text{C}$  gave a brown solid (45.2 mg, 0.0992 mmol, >98% yield): enantiomeric ratio was determined by HPLC with DAICEL CHIRALPAK AD-H<sup>®</sup> (hexane/*i*-PrOH = 90/10, v/v, flow rate = 1.00 mL/min, 30  $^\circ\text{C}$ , UV = 254 nm),  $T_{\text{R}} = 20.5$  min (minor) and  $T_{\text{R}} = 26.8$  min (major), 79:21 er (Supplementary Figure 64);  $^1\text{H}$  NMR (400 MHz,  $\text{CDCl}_3$ )  $\delta$  8.12 (d,  $J = 8.2$  Hz, 1H), 7.70 (d,  $J = 8.2$  Hz, 1H), 7.54 (t, 8.2 Hz, 1H), 7.49–7.18 (m, 11H), 7.09–6.99 (m, 3 H);  $^{13}\text{C}$  NMR (100 MHz,  $\text{CDCl}_3$ )  $\delta$  169.3, 166.2, 150.4, 150.1, 149.3, 139.7, 136.6, 130.8, 129.7, 129.6, 128.3, 128.3, 127.5, 127.4, 127.1, 127.1, 126.7, 126.5, 125.8, 125.3, 121.5, 121.2, 116.2, 61.4; IR (KBr) 3108, 2929, 1813, 1749, 1722, 1600, 1491, 846  $\text{cm}^{-1}$ ; HRMS (ESI<sup>+</sup>) calculated for  $\text{C}_{26}\text{H}_{18}\text{NO}_5\text{S}$   $[\text{M}+\text{H}]^+$ : 456.0821; found: 456.0911; mp 165.8–166.3  $^\circ\text{C}$ ;  $[\alpha]_{\text{D}}^{21} +112.6$  (*c* 0.51,  $\text{CH}_2\text{Cl}_2$ , 79:21 er, (*R*)-configuration) [lit.<sup>10</sup>  $[\alpha]_{\text{D}}^{23} +60.4$  (*c* 0.48,  $\text{CHCl}_3$ , 99:1 er, (*R*)-configuration)].

### (*S*)-Diphenyl 5-bromo-3-methyl-2-oxoindoline-1,3-dicarboxylate (**10l**)<sup>10</sup>

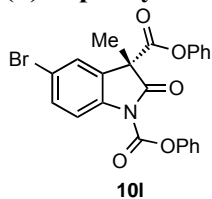

According to general procedure, substrate **9l**<sup>10</sup> (93.5 mg, 0.201 mmol) with a solution of catalyst **1j** (20.0  $\mu\text{L}$ , 50.0 mM in THF, 1.00  $\mu\text{mol}$ ) in THF (0.500 mL) at  $-20\text{ }^\circ\text{C}$  gave a colorless solid (92.5 mg, 0.198 mmol, >98% yield): enantiomeric ratio was determined by HPLC with DAICEL CHIRALPAK AD-H<sup>®</sup> (hexane/*i*-PrOH = 90/10, v/v, flow rate = 1.00 mL/min, 30  $^\circ\text{C}$ , UV = 254 nm),  $T_{\text{R}} = 13.1$  min (minor) and  $T_{\text{R}} = 17.5$  min (major), 92:8 er (Supplementary Figure 65);  $^1\text{H}$  NMR (400 MHz,  $\text{CDCl}_3$ )  $\delta$  7.95 (d,  $J = 8.4$  Hz, 1H), 7.60–7.51 (m, 2H), 7.45 (t,  $J = 7.8$  Hz, 2H), 7.40–7.20 (m, 6H), 7.00 (dd,  $J = 8.0$  Hz, 2H), 1.89 (s, 3H);  $^{13}\text{C}$  NMR (100 MHz,  $\text{CDCl}_3$ )  $\delta$  171.6, 167.1, 150.3, 150.0, 149.3, 138.2, 133.0, 130.5, 129.8, 129.7, 126.8, 126.7, 126.3, 121.5, 121.2, 118.7, 117.7, 55.9, 21.0; IR (KBr) 3072, 2630, 1813, 1782, 1739, 1475, 1340, 742  $\text{cm}^{-1}$ ; HRMS (FAB<sup>+</sup>) calculated for  $\text{C}_{23}\text{H}_{17}\text{BrNO}_5$   $[\text{M}+\text{H}]^+$  464.1492, found 464.1482; mp 59.8–60.3  $^\circ\text{C}$ ;  $[\alpha]_{\text{D}}^{24} +2.52$  (*c* 0.52,  $\text{CH}_2\text{Cl}_2$ , 92:8 er, (*S*)-configuration) [lit.<sup>10</sup>  $[\alpha]_{\text{D}}^{24} +3.90$  (*c* 0.50,  $\text{CHCl}_3$ , 90.5:9.5 er, (*S*)-configuration)].

### (*S*)-Phenyl 1,3-dimethyl-2-oxoindoline-3-carboxylate (**10m**)<sup>9,17</sup>

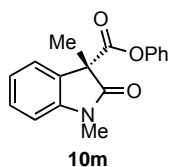

According to general procedure, substrate **9m**<sup>9,17</sup> (27.9 mg, 0.100 mmol) with a solution of catalyst **1j** (10.0  $\mu\text{L}$ , 50.0 mM in THF, 0.500  $\mu\text{mol}$ ) in THF (0.250 mL) at  $-20\text{ }^\circ\text{C}$  gave a colorless solid (27.9 mg, 0.100 mmol, >98% yield): enantiomeric ratio was determined by HPLC with DAICEL CHIRALPAK AD-H<sup>®</sup> (hexane/*i*-PrOH = 90/10, v/v, flow rate = 1.00 mL/min, 30  $^\circ\text{C}$ , UV = 254 nm),  $T_{\text{R}} = 9.8$  min (minor) and  $T_{\text{R}} = 15.0$  min (major), 87:13 er (Supplementary Figure 66);  $^1\text{H}$  NMR (400 MHz,  $\text{CDCl}_3$ )  $\delta$  7.46–7.22 (m, 4H), 7.21–7.09 (m, 2H), 6.97–6.88 (m, 3H), 3.29 (s, 3H), 1.76 (s, 3H);  $^{13}\text{C}$  NMR (100 MHz,  $\text{CDCl}_3$ )  $\delta$  174.8, 168.6, 150.6, 143.9, 129.9, 129.5, 126.2, 123.2, 123.1, 121.4, 108.8, 55.3, 26.8, 20.1; IR (KBr) 1761, 1728, 1610, 1491, 1182, 1086, 743  $\text{cm}^{-1}$ ;  $[\alpha]_{\text{D}}^{22} +28.4$  (*c* 0.50,  $\text{CH}_2\text{Cl}_2$ , 87:13 er, (*S*)-configuration).



**(S)-Bis(4-methoxyphenyl) 3-methyl-2-oxindoline-1,3-dicarboxylate (10n)<sup>10</sup>**

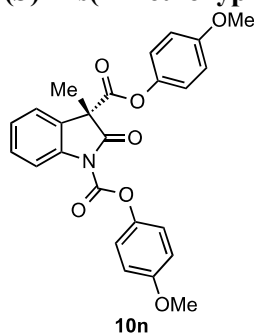

10n

According to general procedure, substrate **9n**<sup>10</sup> (40.1 mg, 0.0993 mmol) with a catalyst **1j** (4.80 mg, 5.00  $\mu$ mol) in THF (1.00 mL) at  $-20$  °C gave a brown oil (40.0 mg, 0.0991 mmol, >98% yield): enantiomeric ratio was determined by HPLC with DAICEL CHIRALPAK AS-3<sup>®</sup> (hexane/*i*-PrOH = 95/5, v/v, flow rate = 0.5 mL/min, 30 °C, UV = 254 nm),  $T_R$  = 47.8 min (major) and  $T_R$  = 62.8 min (minor), 98:2 er (Supplementary Figure 35); <sup>1</sup>H NMR (400 MHz, CDCl<sub>3</sub>)  $\delta$  8.04 (d,  $J$  = 8.0 Hz, 1H), 7.47–7.38 (m, 2H), 7.32–7.16 (m, 3H), 6.98–6.80 (m, 6H), 3.83 (s, 3H), 3.77 (m, 3H), 1.88 (s, 3H); <sup>13</sup>C NMR (100 MHz, CDCl<sub>3</sub>)  $\delta$  172.6, 168.1, 157.9, 157.7, 149.8, 143.8, 143.7, 139.2, 129.9, 128.8, 125.8, 123.0, 122.4, 122.0, 116.0, 114.7, 114.5, 56.0, 55.7, 55.7, 21.0; IR (KBr) 2359, 1807, 1780, 1748, 1715, 1504, 1348, 1221, 1175, 1099, 764 cm<sup>-1</sup>; HRMS (FAB<sup>+</sup>) calculated for C<sub>25</sub>H<sub>22</sub>NO<sub>7</sub> [M+H]<sup>+</sup> 448.1390, found 488.1417; [ $\alpha$ ]<sub>D</sub><sup>24</sup> +103.3 (*c* 0.25, CH<sub>2</sub>Cl<sub>2</sub>, 98:2 er, (*S*)-configuration) [lit.<sup>10</sup> [ $\alpha$ ]<sub>D</sub><sup>24</sup> +30.5 (*c* 0.45, CHCl<sub>3</sub>, 91:9 er, (*S*)-configuration)].

**(S)-Bis(4-fluorophenyl) 3-methyl-2-oxindoline-1,3-dicarboxylate (10o)<sup>10</sup>**

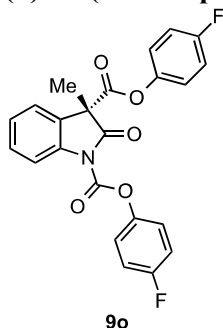

9o

According to general procedure, substrate **9o**<sup>10</sup> (42.9 mg, 0.101 mmol) with a catalyst **1j** (5.00 mg, 5.20  $\mu$ mol) in THF (1.00 mL) at  $-20$  °C gave a colorless solid (42.7 mg, 0.101 mmol, >98% yield): enantiomeric ratio was determined by HPLC with DAICEL CHIRALPAK AD-H<sup>®</sup> (hexane/*i*-PrOH = 97.5/2.5, v/v, flow rate = 1.00 mL/min, 30 °C, UV = 254 nm),  $T_R$  = 33.6 min (minor) and  $T_R$  = 68.6 min (major), 96:4 er (Supplementary Figure 36); <sup>1</sup>H NMR (600 MHz, CDCl<sub>3</sub>)  $\delta$  8.04 (d,  $J$  = 7.9 Hz, 1H), 7.46 (td,  $J$  = 7.9, 1.1 Hz, 1H), 7.41 (dd,  $J$  = 7.9, 1.1 Hz, 1H), 7.38–7.20 (m, 3H), 7.19–6.90 (m, 6H), 1.89 (s, 3H); <sup>13</sup>C NMR (100 MHz, CDCl<sub>3</sub>)  $\delta$  172.2, 167.6, 160.6 (d,  $J$  = 244.4 Hz), 160.5 (d,  $J$  = 244.4 Hz), 149.2, 145.9 (d,  $J$  = 13.4 Hz), 138.9, 130.0, 128.6, 125.8, 123.0 (d,  $J$  = 8.6 Hz), 122.6 (d,  $J$  = 8.6 Hz), 116.4, 116.3, 116.2, 116.0, 115.9, 55.8, 20.9; IR (KBr) 1780, 1751, 1506, 1179, 831, 768 cm<sup>-1</sup>; HRMS (FAB<sup>+</sup>) calculated for C<sub>23</sub>H<sub>16</sub>F<sub>2</sub>NO<sub>5</sub> [M+H]<sup>+</sup>: 424.0991, found: 424.0995; mp 127.8–128.7 °C; [ $\alpha$ ]<sub>D</sub><sup>24</sup> +73.9 (*c* 0.58, CH<sub>2</sub>Cl<sub>2</sub>, 96:4 er, (*S*)-configuration) [lit.<sup>10</sup> [ $\alpha$ ]<sub>D</sub><sup>20</sup> +57.8 (*c* 0.28, CHCl<sub>3</sub>, 68:32 er, (*S*)-configuration)].

**(S)-Dibenzyl 3-methyl-2-oxindoline-1,3-dicarboxylate (10p)<sup>10, 11</sup>**

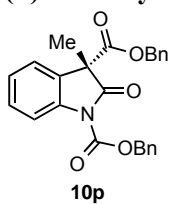

10p

According to general procedure, substrate **9p**<sup>10</sup> (37.1 mg, 0.100 mmol) with a catalyst **1j** (4.80 mg, 5.00  $\mu$ mol) in THF (1.00 mL) at  $-20$  °C gave a colorless solid (36.9 mg, 94% conv): enantiomeric ratio was determined by HPLC with DAICEL CHIRALPAK AD-H<sup>®</sup> (hexane/*i*-PrOH = 97.5/2.5, v/v, flow rate = 1.00 mL/min, 30 °C, UV = 254 nm),  $T_R$  = 25.8 min (major) and  $T_R$  = 30.6 min (minor), 92:8 er (Supplementary Figure 37); <sup>1</sup>H NMR (400

MHz, CDCl<sub>3</sub>)  $\delta$  7.93 (d,  $J$  = 8.0 Hz, 1H), 7.51 (d,  $J$  = 7.2 Hz, 2H), 7.44–7.31 (m, 4H), 7.26–7.06 (m, 7H), 5.46 (s, 2H), 5.11 (s, 2H), 1.74 (s, 3H); <sup>13</sup>C NMR (100 MHz, CDCl<sub>3</sub>)  $\delta$  173.0, 168.8, 150.8, 139.3, 135.2, 134.9, 129.5, 128.8, 128.6, 128.6, 128.3, 128.2, 127.4, 125.2, 123.1, 115.7, 68.9, 67.6, 55.8, 20.7; IR (KBr) 2359, 1776, 1738, 1288, 1227, 696 cm<sup>-1</sup>; [ $\alpha$ ]<sub>D</sub><sup>23</sup> +26.9 (*c* 0.52, CH<sub>2</sub>Cl<sub>2</sub>, 92.5:7.5 er, (*S*)-configuration) [lit.<sup>10</sup> [ $\alpha$ ]<sub>D</sub><sup>23</sup> +37.6 (*c* 0.13, CHCl<sub>3</sub>, 88:12 er, (*S*)-configuration)].

### (S)-dimethyl 3-methyl-2-oxindoline-1,3-dicarboxylate (**10q**)

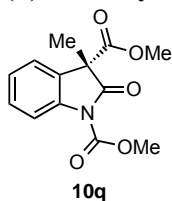

According to general procedure, substrate **9q** (26.1 mg, 0.0991 mmol) with a catalyst **1j** (4.70 mg, 4.89  $\mu\text{mol}$ ) in THF (1.00 mL) at  $-20\text{ }^\circ\text{C}$  gave a colorless solid (25.8 mg, 88% conv): enantiomeric ratio was determined by HPLC with DAICEL CHIRALPAK AD-H<sup>®</sup> (hexane/*i*-PrOH = 97.5/2.5, v/v, flow rate = 1.00 mL/min,  $30\text{ }^\circ\text{C}$ , UV = 254 nm),  $T_R = 14.0$  min (major) and  $T_R = 15.7$  min (minor), 95:5 er (Supplementary Figure 38);  $^1\text{H}$  NMR (400 MHz,  $\text{CDCl}_3$ )  $\delta$  7.96 (d,  $J = 7.7$  Hz, 1H), 7.38 (td,  $J = 7.7, 1.3$  Hz, 1H), 7.28 (dd,  $J = 7.7, 1.3$  Hz, 1H), 7.22 (t,  $J = 7.7$  Hz, 1H), 4.04 (s, 3H), 3.67 (s, 3H), 1.73 (s, 3H);  $^{13}\text{C}$  NMR (100 MHz,  $\text{CDCl}_3$ )  $\delta$  173.2, 169.5, 151.4, 139.2, 129.5, 128.9, 125.3, 123.0, 115.6, 55.6, 54.2, 53.4, 21.0; IR (KBr) 1801, 1778, 1742, 1439, 1350, 1244,  $770\text{ cm}^{-1}$ ; HRMS (FAB<sup>+</sup>) calculated for  $\text{C}_{13}\text{H}_{14}\text{NO}_5$   $[\text{M}+\text{H}]^+$  264.0866, found 264.0849; mp  $89.3\text{--}89.9\text{ }^\circ\text{C}$ ;  $[\alpha]_D^{22} +80.3$  ( $c$  0.57,  $\text{CH}_2\text{Cl}_2$ , 95:5 er, (*S*)-configuration).

### Considerations for the scrambling in Steglich rearrangement

Crossover experiment showed that treatment of 1:1 mixture of enol carbonates **9a** and **9n** using 0.5 mol % **1j** gave **9a** and **9n**; enol carbonates probably **9a'** and **9n'**; **10a** and **10n**; and **10a'** and **10n'** due to scrambling. This reaction was quenched after 30 min and the conversion was 30% that was determined by  $^1\text{H}$  NMR analysis of unpurified reaction mixture. Consequently, scrambling was occurred rapidly before C-C bond forming step. Same scrambling results were reported in the Steglich rearrangement of azlactone.<sup>18-20</sup>

When the reaction quenched after 5 h, the conversion to products was >98% and the enantiomeric ratios of products were determined by HPLC analysis as 96:4 er (**10a**), 97:3 er (**10n**), 96.5:3.5 er and 97:3 er (**10a'** or **10n'**) respectively. The enantiomeric ratio was determined by HPLC with CHIRALPAK AD-H<sup>®</sup> (hexane/*i*-PrOH = 92.5/7.5, v/v), flow rate = 1.00 mL/min,  $30\text{ }^\circ\text{C}$ , UV = 254 nm) (Supplementary Figure 68).

### General procedure for kinetic experiment and data in Steglich rearrangement

To a solution of **9a** (112 mg, 0.299 mmol) in THF (0.750 mL) was added a solution of **1j**, **1j'**, or DMAP (50.0 mM, 2.50  $\mu\text{L}$ , 1.50  $\mu\text{mol}$ ) in THF at  $-20\text{ }^\circ\text{C}$ . After stirring the indicated periods in Supplementary Table 6, the reaction mixture was sucked 100  $\mu\text{L}$  by syringe, poured into 1 M aqueous HCl (2 mL), extracted with EtOAc (3 mL  $\times$  3), dried over  $\text{MgSO}_4$ , and concentrated *in vacuo*. The crude product was passed through a short pad of silica gel (eluent: hexane/ $\text{Et}_2\text{O}$  = 1/1, v/v) and  $^1\text{H}$  NMR and HPLC were measured. The conversion was calculated by  $^1\text{H}$  NMR analysis and the enantiomeric ratio was determined by HPLC analysis.

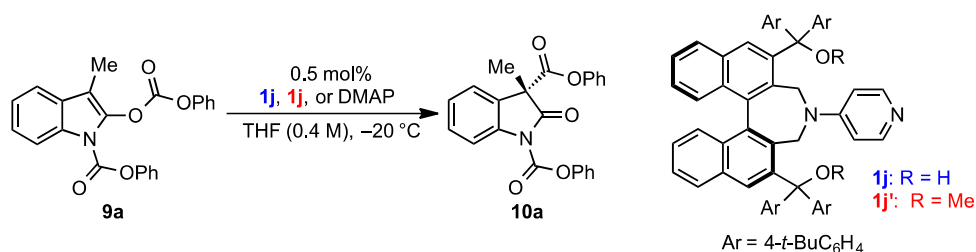

## Kinetic resolution of secondary carbinol (Figure 9a)

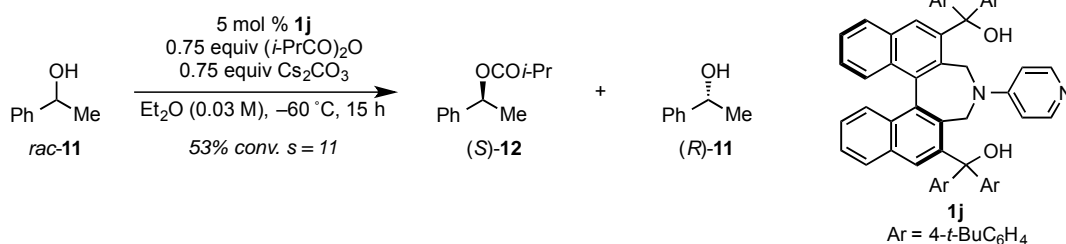

To a solution of racemic **11** (9.20  $\mu\text{L}$ , 76.3  $\mu\text{mol}$ ),  $\text{Cs}_2\text{CO}_3$  (18.7 mg, 57.4  $\mu\text{mol}$ ) and **1j** (3.50 mg, 3.64  $\mu\text{mol}$ ) in THF (2.25 mL) was added  $(i\text{-PrCO})_2\text{O}$  (9.48  $\mu\text{L}$ , 57.2  $\mu\text{mol}$ ) at  $-60^\circ\text{C}$ . The reaction mixture was stirred for 15 h at  $-60^\circ\text{C}$ , then MeOH (3 mL) was added to reaction vessel and stirred for 15 min at room temperature. The resulting solution was transferred to other flask using  $\text{Et}_2\text{O}$  to wash the reaction vessel and concentrated in *vacuo*. The residue was through a short pad of silica gel (eluent: hexane/ $\text{Et}_2\text{O}$  = 1/1, v/v) to give the crude mixture (11.9 mg, 53% conv,  $s = 11.4$ , er of acylate **12** = 84:16, er of substrate **11** = 88:12). The conversion was determined by  $^1\text{H}$  NMR analysis of the crude mixture and, enantiomeric ratios were determined by HPLC analysis. The conversion ( $C$ ) and selectivity factor ( $s$ ) of kinetic resolution were calculated by following Kagan's equation.<sup>21</sup>

$$s = \frac{\ln[1 - C(1 + ee')]}{\ln[1 - C(1 - ee')]} = \frac{\ln[(1 - C)(1 - ee)]}{\ln[(1 - C)(1 + ee)]} = \frac{k_{fast}}{k_{slow}}$$

$ee$  = enantiomeric excess measured for the starting material

$ee'$  = enantiomeric excess measured for the product

$$C = \frac{ee}{ee + ee'} \cdot 100 = \text{conversion}$$

### Analytical data for **11** and **12**

#### (*R*)-1-Phenylethanol (**11**)<sup>22</sup>

Enantiomeric ratio was determined by HPLC with DAICEL CHIRALPAK<sup>®</sup> OJ-H (hexane/*i*-PrOH = 99/1, v/v, flow rate = 0.500 mL/min, 30  $^\circ\text{C}$ , UV = 254 nm),  $T_R = 57.6$  min (minor) and  $T_R = 61.4$  min (major), 88:12 er (Supplementary Figure 71);  $^1\text{H}$  NMR (400 MHz,  $\text{CDCl}_3$ )  $\delta$  7.42–7.30 (m, 4H), 7.30–7.21 (m, 1H), 4.91 (q,  $J = 6.5$  Hz, 1H), 1.51 (d,  $J = 6.5$  Hz, 3H);  $^{13}\text{C}$  NMR (100 MHz,  $\text{CDCl}_3$ )  $\delta$  145.9, 128.5, 127.5, 125.5, 70.4, 25.2; IR (KBr) 3354, 2974, 1454, 1282, 899, 760, 698  $\text{cm}^{-1}$ ;  $[\alpha]_D^{20} +12.4$  ( $c$  0.49,  $\text{CHCl}_3$ , 68:32 er) [lit.<sup>22</sup>  $[\alpha]_D^{20} +27.0$  [ $c$  0.270,  $\text{CHCl}_3$ , 38% ee, (*R*) form].

#### (*S*)-1-Phenylethyl isobutyrate (**12**)<sup>23</sup>

Enantiomeric ratio was determined by HPLC with DAICEL CHIRALPAK<sup>®</sup> OJ-H (hexane/*i*-PrOH = 99/1, v/v, flow rate = 0.500 mL/min, 30  $^\circ\text{C}$ , UV = 254 nm),  $T_R = 12.1$  min (minor) and  $T_R = 13.7$  min (major), 84:16 er (Supplementary Figure 72);  $^1\text{H}$  NMR (400 MHz,  $\text{CDCl}_3$ ) 7.40–7.21 (m, 5H), 5.87 (q,  $J = 6.7$  Hz, 1H), 2.57 (sep,  $J = 6.9$  Hz, 1H), 1.52 (d,  $J = 6.7$  Hz, 3H), 1.18 (d,  $J = 6.9$  Hz, 3H), 1.16 (d,  $J = 6.9$  Hz, 3H);  $^{13}\text{C}$  NMR (100 MHz,  $\text{CDCl}_3$ )  $\delta$  176.4, 142.1, 128.6, 127.8, 126.0, 72.0, 34.2, 22.4, 19.0; IR (KBr) 3034, 2978, 2934, 2876, 1732, 1454,

1192, 1157, 1065, 760, 698  $\text{cm}^{-1}$ ;  $[\alpha]_{\text{D}}^{22} -29.7$  ( $c$  1.09,  $\text{CHCl}_3$ , 81:19  $er$ ).

### Kinetic resolution of racemic 1,2-diol (Figure 9b)

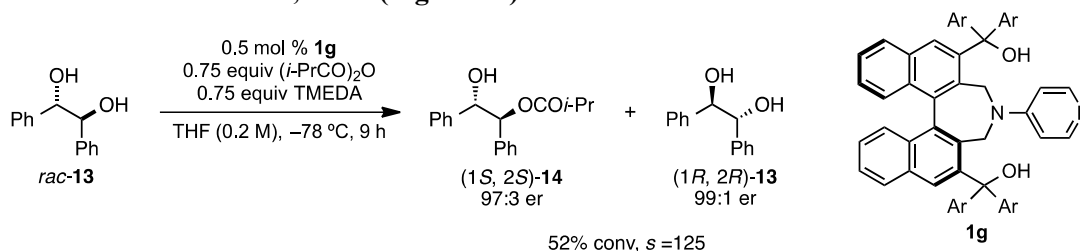

To a solution of racemic **13** (64.1 mg, 0.299 mmol), TMEDA (33.5  $\mu\text{L}$ , 0.225 mmol) and **1g** (1.1 mg, 1.50  $\mu\text{mol}$ ) in THF (1.50 mL) was added  $(i\text{-PrCO})_2\text{O}$  (37.3  $\mu\text{L}$ , 0.225 mmol) at  $-78$   $^\circ\text{C}$ . The reaction mixture was stirred for 9 h at  $-78$   $^\circ\text{C}$ , then MeOH (3 mL) was added to reaction vessel and stirred for 15 min at room temperature. The resulting solution was transferred to other flask using  $\text{Et}_2\text{O}$  to wash the reaction vessel and concentrated in *vacuo*. The residue was through a short pad of silica gel (eluent: hexane/ $\text{Et}_2\text{O}$  = 1/1, v/v) to give the crude mixture (75.1 mg, 52% conv,  $s = 125$ ,  $er$  of monoacylate **14** = 97:3,  $er$  of substrate **13** = 99:1). The conversion was determined by  $^1\text{H}$  NMR analysis of the crude mixture and, enantiomeric ratios were determined by HPLC analysis. The conversion ( $C$ ) and selectivity factor ( $s$ ) of kinetic resolution were calculated by preceding Kagan's equation.<sup>21</sup>

### Analytical data for **13** and **14**

#### (1*R*,2*R*)-hydrobenzoin (**13**)<sup>24</sup>

Colorless solid. Enantiomeric ratio was determined by HPLC with DAICEL CHIRALPAK<sup>®</sup> AS-3 (hexane/*i*-PrOH = 97/3, v/v, flow rate = 0.85 mL/min, 30  $^\circ\text{C}$ , UV = 254 nm),  $T_{\text{R}} = 18.9$  min (major) and  $T_{\text{R}} = 21.3$  min (minor), 99:1  $er$  (Supplementary Figure 75);  $^1\text{H}$  NMR (400 MHz,  $\text{CDCl}_3 + 0.03\%$  TMS)  $\delta$  7.29–7.19 (m, 6H), 7.17–7.09 (m, 4H), 4.72 (s, 2H), 2.84 (s, 2H);  $^{13}\text{C}$  NMR (100 MHz,  $\text{CDCl}_3$ )  $\delta$  140.0, 128.2, 128.0, 127.1, 79.2; IR (KBr) 3499, 3395, 2895, 1452, 1198, 1045, 777, 706, 694  $\text{cm}^{-1}$ ;  $[\alpha]_{\text{D}}^{24} +14.6$  ( $c$  1.03, EtOH, 72:28  $er$ , (1*R*, 2*R*)-configuration) [lit.<sup>24</sup>.  $[\alpha]_{\text{D}}^{28} +92.7$  ( $c$  1.0, EtOH, 97% ee, (1*R*, 2*R*)-configuration)].

#### (1*S*,2*S*)-2-hydroxy-1,2-diphenylethyl isobutyrate (**14**)<sup>25</sup>

Colorless solid. Enantiomeric ratio was determined by HPLC with DAICEL CHIRALPAK<sup>®</sup> AS-3 (hexane/*i*-PrOH = 95/5, v/v, flow rate = 0.95 mL/min, 30  $^\circ\text{C}$ , UV = 254 nm),  $T_{\text{R}} = 8.8$  min (major) and  $T_{\text{R}} = 11.8$  min (minor), 97:3  $er$  (Supplementary Figure 76);  $^1\text{H}$  NMR (400 MHz,  $\text{CDCl}_3 + 0.03\%$  TMS)  $\delta$  7.51–7.27 (m, 10H), 7.22 (d,  $J = 7.6$  Hz, 1H), 6.97 (d,  $J = 8.0$  Hz, 2H), 1.90 (s, 3H);  $^{13}\text{C}$  NMR (100 MHz,  $\text{CDCl}_3$ )  $\delta$  176.2, 139.2, 137.2, 128.2, 127.1, 79.8, 34.2, 19.1, 19.0; IR (KBr) 3445, 3032, 2972, 1740, 1705, 1456, 1209, 1159, 766, 700  $\text{cm}^{-1}$ ;  $[\alpha]_{\text{D}}^{22} +4.91$  ( $c$  1.05, MeOH, 84:16  $er$  (1*S*, 2*S*)-configuration) [lit.<sup>25</sup>  $[\alpha]_{\text{D}}^{22} +1.7$  ( $c$  1.0, MeOH, 65% ee, (1*S*, 2*S*)-configuration)].

### Enantioselective desymmetrization of *meso*-1,2-diol

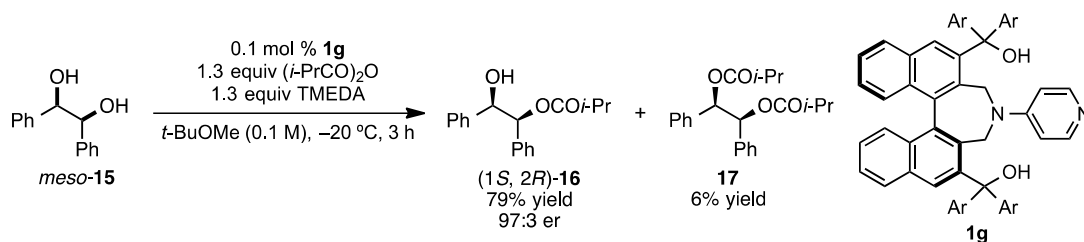

To a reaction vessel was added solution of catalyst **1g** (10.0 mM in chloroform, 40.0  $\mu\text{L}$ , 0.400  $\mu\text{mol}$ ) and reaction vessel was evaporated and dried under reduced pressure. The reaction vessel was added *meso*-hydrobenzoin **15** (85.6 mg, 0.400 mmol),  $\text{Et}_3\text{N}$  (72.2  $\mu\text{L}$ , 0.519 mmol) and, TBME (4.00 mL) at room temperature. The mixture was cooled to  $-20^\circ\text{C}$  and then isobutyric anhydride (86.2  $\mu\text{L}$ , 0.520 mmol) was added. The reaction mixture was stirred at  $-20^\circ\text{C}$  for 3 h, then methanol was added to reaction vessel and stirred for 1 h at room temperature. The resulting solution was transferred to other flask using  $\text{Et}_2\text{O}$  to wash the reaction vessel and concentrated in *vacuo*. The residue was through a short pad of silica gel (eluent:  $\text{Et}_2\text{O}$ ) to give the crude mixture. The purification of the crude product by flash column chromatography on a silica gel (eluent: hexane/ $\text{Et}_2\text{O}$  = 5/1 to 3/1 to 1/1 to  $\text{Et}_2\text{O}$ , v/v) gave the **16** (89.7 mg, 0.315 mmol, 79% yield, 97:3 er), **17** (8.6 mg, 24.3  $\mu\text{mol}$ , 6% yield), recovered substrate **15** (10.3 mg, 0.0481 mmol, 12% yield of recovered).

#### Analytical data for products *meso*-15–17

##### *meso*-1,2-diphenylethane-1,2-diol (**15**)<sup>12</sup>

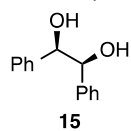

Colorless solid.  $^1\text{H NMR}$  (400 MHz,  $\text{CDCl}_3+0.03\%$  TMS)  $\delta$  7.35–7.21 (m, 10H), 4.83 (s, 2H), 2.20 (s, 2H);  $^{13}\text{C NMR}$  (100 MHz,  $\text{CDCl}_3$ )  $\delta$  139.9, 128.3, 128.2, 127.2, 78.2; IR (KBr) 3375, 3321, 2901, 1452, 1279, 1034, 1022, 754, 700  $\text{cm}^{-1}$

##### (1*S*,2*R*)-2-hydroxy-1,2-diphenylethyl isobutyrate (**16**)<sup>26</sup>

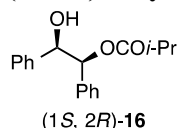

Colorless solid. Enantiomeric ratio was determined by HPLC with DAICEL CHIRALPAK<sup>®</sup> OJ-H (hexane/*i*-PrOH = 98/2, v/v, flow rate = 1.0 mL/min, 30  $^\circ\text{C}$ , UV = 254 nm),  $T_R$  = 27.6 min (major) and  $T_R$  = 37.6 min (minor), 97:3 er (Supplementary Figure 78);  $^1\text{H NMR}$  (400 MHz,  $\text{CDCl}_3+0.03\%$  TMS)  $\delta$  7.36–7.24 (m, 10H), 5.90 (d,  $J$  = 6.5 Hz, 1H), 4.96 (dd,  $J$  = 6.5, 3.5 Hz, 1H), 2.48 (sep.,  $J$  = 7.0 Hz, 1H), 2.11 (d,  $J$  = 3.5 Hz, 1H), 1.05 (d,  $J$  = 7.0 Hz, 3H), 1.01 (d,  $J$  = 7.0 Hz, 3H);  $^{13}\text{C NMR}$  (150 MHz,  $\text{CDCl}_3$ )  $\delta$  175.8, 139.8, 137.1, 128.5, 128.4, 128.2, 128.2 (2), 127.7, 127.6, 127.2, 78.5, 76.7, 34.1, 18.8; 3536, 2974, 2866, 1717, 1452, 1389, 1152, 970, 748, 706  $\text{cm}^{-1}$ ;  $[\alpha]_D^{21} +16.9$  ( $c$  0.85,  $\text{EtOAc}$ , 96:4 er, (1*S*, 2*R*)-configuration) [lit.<sup>26</sup>  $[\alpha]_D +27.2$  ( $c$  0.85,  $\text{EtOAc}$ , 99:1 er, (1*S*, 2*R*)-configuration)].

##### (1*R*,2*S*)-1,2-diphenylethane-1,2-diyl bis(2-methylpropanoate) (**17**)<sup>26</sup>

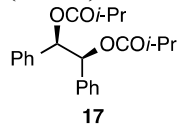

Colorless solid.  $^1\text{H NMR}$  (400 MHz,  $\text{CDCl}_3$ , 0.03% TMS)  $\delta$  7.31–7.19 (m, 10H), 6.07 (s, 2H), 2.48 (sep.,  $J$  = 7.0 Hz, 2H), 1.06 (d,  $J$  = 7.0 Hz, 6H), 1.03 (d,  $J$  = 7.0 Hz, 6H);  $^{13}\text{C NMR}$  (100 MHz,  $\text{CDCl}_3$ )  $\delta$  175.5, 136.6, 128.4, 128.2, 127.7, 76.3, 34.2, 18.9, 18.8; IR (KBr) 2974, 2936, 1728, 1458, 1192, 1157, 762, 700  $\text{cm}^{-1}$

## Supplementary Reference

1. Frisch, M. J. et al. Gaussian 03, revision C.02. 2004.
2. Becke, A. D. Density-functional exchange-energy approximation with correct asymptotic behavior. *Phys. Rev. A* **38**, 3098-3100 (1988).
3. Lee, C., Yang, W. & Parr, R. G. Development of the colle-salvetti correlation-energy formula into a functional of the electron density. *Phys. Rev. B* **37**, 785-789 (1988).
4. Ooi, T., Kameda, M. & Maruoka, K. Molecular design of a  $C_2$ -symmetric chiral phase-transfer catalyst for practical asymmetric synthesis of  $\alpha$ -amino acids. *J. Am. Chem. Soc.* **121**, 6519-6520 (1999).
5. Ooi, T., Kameda, M. & Maruoka, K. Design of  $N$ -spiro  $C_2$ -symmetric chiral quaternary ammonium bromides as novel chiral phase-transfer catalysts: Synthesis and application to practical asymmetric synthesis of  $\alpha$ -amino acids. *J. Am. Chem. Soc.* **125**, 5139-5151 (2003).
6. Liang, D. C., Luo, R. S., Yin, L. H., Chan, A. S. & Lu, G. A new synthetic route for axially chiral secondary amines with binaphthyl backbone and their applications in asymmetric michael reaction of aldehydes to nitroalkenes. *Org. Biomol. Chem.* **10**, 3071-3079 (2012).
7. Kano, T., Lan, Q., Wang, X. & Maruoka, K. Effects of aromatic substituents on binaphthyl-based chiral spiro-type ammonium salts in asymmetric phase-transfer reactions. *Adv. Synth. Catal.* **349**, 556-560 (2007).
8. Trost, B. M., Zhang, Y. & Zhang, T. Direct  $N$ -carbamoylation of 3-monosubstituted oxindoles with alkyl imidazole carboxylates. *J. Org. Chem.* **74**, 5115-5117 (2009).
9. Shaw, S. A. et al. Enantioselective TADMAP-catalyzed carboxyl migration reactions for the synthesis of stereogenic quaternary carbon. *J. Am. Chem. Soc.* **128**, 925-934 (2006).
10. Mandai, H. et al. Enantioselective steglich rearrangement of oxindole derivatives by easily accessible chiral  $N,N$ -4-(dimethylamino)pyridine derivatives. *Org. Lett.* **17**, 4436-4439 (2015).
11. Rajeswaran, W. G. & Cohen, L. A. Studies on protection of oxindoles. *Tetrahedron* **54**, 11375-11380 (1998).
12. Yamada, S., Misono, T., Iwai, Y., Masumizu, A. & Akiyama, Y. New class of pyridine catalyst having a conformation switch system: Asymmetric acylation of various *sec*-alcohols. *J. Org. Chem.* **71**, 6872-6880 (2006).
13. Qian, C. T., Huang, T. S., Zhu, C. J. & Sun, J. Synthesis of 3,3'-, 6,6'- and 3,3',6,6'-substituted binaphthols and their application in the asymmetric hydrophosphonylation of aldehydes—an obvious effect of substituents of BINOL on the enantioselectivity. *J. Chem. Soc., Perkin Trans. 1* 2097-2103 (1998).
14. Martin, R., Mathieu, V., Sorokin, V., Bachawala, P. & Mazur, W. A., inventors;  $N$ -Phenyl carbazole-based host material for light-emitting diodes patent WO 2010/043691, April 22, 2010.
15. Zhang, Y., Lu, Z., Desai, A. & Wulff, W. D. Mapping the active site in a chemzyme: Diversity in the  $N$ -substituent in the catalytic asymmetric aziridination of imines. *Org. Lett.* **10**, 5429-5432 (2008).
16. Shaw, S. A., Aleman, P. & Vedejs, E. Development of chiral nucleophilic pyridine catalysts: Applications in asymmetric quaternary carbon synthesis. *J. Am. Chem. Soc.* **125**, 13368-13369

(2003).

17. Thomson, J. E. et al. *N*-Heterocyclic carbene catalysed oxygen-to-carbon carboxyl transfer of indolyl and benzofuranyl carbonates. *Synthesis* 2805-2818 (2008).
18. Ruble, J. C. & Fu, G. C. Enantioselective construction of quaternary stereocenters: Rearrangements of *O*-acylated azlactones catalyzed by a planar-chiral derivative of 4-(pyrrolidino)pyridine. *J. Am. Chem. Soc.* **120**, 11532-11533 (1998).
19. Campbell, C. D., Concellón, C. & Smith, A. D. Catalytic enantioselective steglich rearrangements using chiral *N*-heterocyclic carbenes. *Tetrahedron: Asymmetry* **22**, 797-811 (2011).
20. Joannesse, C. et al. Isothiourea-mediated asymmetric *O*- to *C*-carboxyl transfer of oxazolyl carbonates: Structure-selectivity profiles and mechanistic studies. *Chem. Eur. J.* **18**, 2398-2408 (2012).
21. Kagan, H. B. & Fiaud, J. C. Kinetic resolution. *Top. Stereochem.* **18**, 249-330 (1988).
22. Rendler, S. & Oestreich, M. Conclusive evidence for an S<sub>N</sub>2-Si mechanism in the B(C<sub>6</sub>F<sub>5</sub>)<sub>3</sub>-catalyzed hydrosilylation of carbonyl compounds: Implications for the related hydrogenation. *Angew. Chem. Int. Ed. Engl.* **47**, 5997-6000 (2008).
23. Klomp, D. et al. Combined epimerisation and acylation: Meerwein-Ponndorf-Verley-Oppenauer catalysts in action. *Org. Biomol. Chem.* **3**, 483-489 (2005).
24. Takenaka, N., Xia, G. & Yamamoto, H. Catalytic, highly enantio- and diastereoselective pinacol coupling reaction with a new tethered bis(8-quinolinolato) ligand. *J. Am. Chem. Soc.* **126**, 13198-13199 (2004).
25. Matsumura, Y., Maki, T., Murakami, S. & Onomura, O. Copper ion-induced activation and asymmetric benzoylation of 1,2-diols: Kinetic chiral molecular recognition. *J. Am. Chem. Soc.* **125**, 2052-2053 (2003).
26. Anju, K. S., Ramakrishnan, S., Thomas, A. P., Suresh, E. & Srinivasan, A. 9,10,19,20-Tetraarylporphycenes. *Org. Lett.* **10**, 5545-5548 (2008).
